# Supplementary material for: Photocatalytic hydro-fluorosulfonylation of alkenes with N-fluorosulfonyl aldimines
Source: Royal Society of Chemistry journal article supplement (doi:10.1039/d4gc06205a), 2025-01-01

## Supporting Information

# Photocatalytic hydro-fluorosulfonylation of alkenes with N-fluorosulfonyl aldimines

Xiang Zhou, ‡<sup>a,c</sup> Sheng-Cai Wang, ‡<sup>a</sup> Qi-Long Chen,<sup>a</sup> Zi-Yan Zhang,<sup>a</sup> Yan-Shi Xiong,<sup>c\*</sup> Gui Lu<sup>a</sup> and Jiang Weng<sup>a,b\*</sup>

---

<sup>a</sup> State Key Laboratory of Anti-Infective Drug Discovery and Development, Guangdong Provincial Key Laboratory of Chiral Molecule and Drug Discovery, School of Pharmaceutical Sciences, Sun Yat-sen University, Guangzhou, 510006, P. R. China

E-mail: wengj2@mail.sysu.edu.cn

<sup>b</sup> Ministry of Education Key Laboratory for the Synthesis and Application of Organic Functional Molecules, Hubei University, Wuhan, 430062, P. R. China

<sup>c</sup> School of Pharmacy, Jiangxi Science & Technology Normal University, Nanchang, 330013, P. R. China.

E-mail: xiongy1214@163.com

# Table of contents

|                                                                                                                        |           |
|------------------------------------------------------------------------------------------------------------------------|-----------|
| <b>1. General information</b> .....                                                                                    | <b>3</b>  |
| <b>2. Experimental procedures and characterization data</b> .....                                                      | <b>3</b>  |
| 2.1 General procedure for the preparation of imidosulfonyl fluoride.....                                               | 3         |
| 2.2 Characterization data of compounds <b>2a-2j</b> .....                                                              | 3         |
| 2.3 Optimization of reaction conditions and general procedure .....                                                    | 6         |
| 2.4 Experimental procedure for scale-up reactions.....                                                                 | 10        |
| 2.5 Characterization data of compounds <b>4a-4al</b> .....                                                             | 10        |
| 2.6 Experimental procedure for synthetic applications.....                                                             | 20        |
| <b>3. Mechanism studies</b> .....                                                                                      | <b>23</b> |
| 3.1 Radical trapping experiments with TEMPO .....                                                                      | 23        |
| 3.2 Radical trapping experiments with 1,1-diphenylethylene .....                                                       | 24        |
| 3.3 Iminyl radical trapping experiment .....                                                                           | 25        |
| 3.4 Stern-Volmer quenching studies.....                                                                                | 25        |
| <b>4. Green metrics</b> .....                                                                                          | <b>27</b> |
| <b>5. Reference</b> .....                                                                                              | <b>32</b> |
| <b>6. <sup>1</sup>H NMR, <sup>13</sup>C NMR, <sup>19</sup>F NMR and <sup>31</sup>P NMR spectra for compounds</b> ..... | <b>33</b> |

## 1. General information

NMR spectra were recorded with Bruker Avance III HD500 and Bruker Avance III HD400 spectrometer at 500 MHz or 400 MHz. All  $^1\text{H}$ ,  $^{19}\text{F}$  and  $^{13}\text{C}$  NMR spectra were recorded using  $\text{CDCl}_3$  or  $\text{DMSO}-d_6$  as solvent. Tetramethylsilane (TMS) signals or residual solvent signals were used [TMS  $\delta = 0.00$  ( $^1\text{H}$  NMR), Chloroform-*d*  $\delta = 77.16$  ( $^{13}\text{C}$  NMR),  $\text{DMSO}-d_6$   $\delta = 2.50$  ( $^1\text{H}$  NMR),  $39.52$  ( $^{13}\text{C}$  NMR)] as internal standards. The following abbreviations were used to describe peak splitting patterns when appropriate: s = singlet, d = doublet, dd = double doublet, t = triplet, q = quartet, m = multiplet. High-resolution mass spectrometry (HRMS) was performed via electron ionization (EI) or electrospray ionization (ESI) sources or atmospheric pressure chemical ionization (APCI) source. The  $m/z$  ratios are reported in Daltons; high-resolution values are calculated to four decimal places from the molecular formula. All the reactions were monitored by thin layer chromatography (TLC), carried out on 0.25 mm silica gel plates using UV light as visualizing agent. Column chromatography was carried out on silica gel (230-400 mesh). The alkenes were synthesized according to procedures described in the literature.<sup>[1,2,3,4]</sup>

## 2. Experimental procedures and characterization data

### 2.1 General procedure for the preparation of imidosulfonyl fluoride

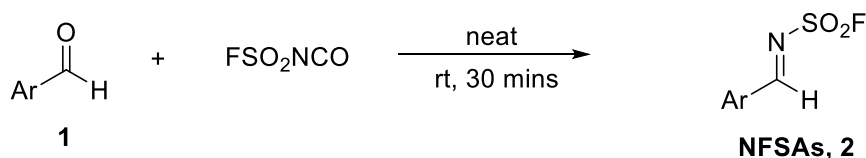

Following a modified literature procedure,<sup>[5]</sup> aldehyde **1** (12.5 mmol, 1.0 eq) was added to a 10 mL Schlenk tube equipped with a magnetic stir bar under nitrogen atmosphere.  $\text{FSO}_2\text{NCO}$  (FSI, 12.5 mmol, 1.0 eq) was then slowly added while stirring, and the mixture was stirred at room temperature for an additional 30 minutes. The solid product obtained can be used directly or recrystallized from hexane.

### 2.2 Characterization data of compounds **2a-2j**

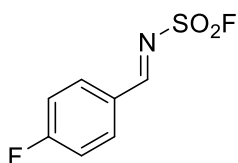

*(E)*-(4-fluorobenzylidene)sulfamoyl fluoride (**2a**)

Following the **General procedure for the preparation of imidosulfonyl fluoride**, recrystallization using n-hexane yielded **2a** as light yellow solid (94% yield).  $^1\text{H}$  NMR (400 MHz, Chloroform-*d*)  $\delta$  9.08 (s, 1H), 8.23 - 7.94 (m, 2H), 7.29 (t,  $J = 8.5$  Hz, 2H),  $^{13}\text{C}$  NMR (101 MHz, Chloroform-*d*)  $\delta$  176.00 (d,  $J = 3.8$  Hz), 169.48, 166.88, 135.15 (d,  $J =$

10.3 Hz), 127.62, 117.46, 117.24,  $^{19}\text{F}$  NMR (376 MHz, Chloroform-*d*)  $\delta$  43.81, -95.07 - -100.30 (m), HRMS (ESI):  $m/z$  calculated for  $[\text{C}_7\text{H}_4\text{F}_2\text{NO}_2\text{S}]$   $[\text{M}-\text{H}]^-$ : 203.9936, found: 203.9938.

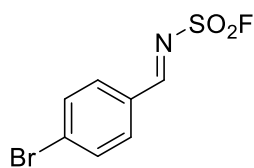

(*E*)-(4-bromobenzylidene)sulfamoyl fluoride (**2b**)

Following the **General procedure for the preparation of imidosulfonyl fluoride**, recrystallization using n-hexane yielded **2b** as yellow solid (95% yield).  $^1\text{H}$  NMR (400 MHz, Chloroform-*d*)  $\delta$  9.06 (s, 1H), 7.88 (d,  $J$  = 8.5 Hz, 2H), 7.74 (d,  $J$  = 8.5 Hz, 2H).  $^{13}\text{C}$  NMR (101 MHz, Chloroform-*d*)  $\delta$  176.49 (d,  $J$  = 3.8 Hz), 133.31, 133.20, 132.98, 132.50, 131.08, 129.93.  $^{19}\text{F}$  NMR (376 MHz, Chloroform-*d*)  $\delta$  43.78, HRMS (ESI):  $m/z$  calculated for  $[\text{C}_7\text{H}_4\text{ClFNO}_2\text{S}]$   $[\text{M}-\text{H}]^-$ : 263.9136, found: 263.9138.

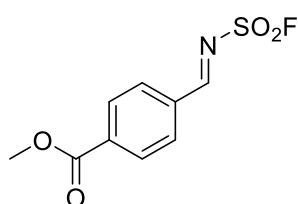

methyl (*E*)-4-((fluorosulfonyl)imino)methylbenzoate (**2c**)

Following the **General procedure for the preparation of imidosulfonyl fluoride**, recrystallization using n-hexane yielded **2c** as yellow solid (96% yield).  $^1\text{H}$  NMR (400 MHz, Chloroform-*d*)  $\delta$  9.15 (s, 1H), 8.38 - 8.19 (m, 2H), 8.10 (d,  $J$  = 8.4 Hz, 2H), 3.98 (s, 3H).  $^{13}\text{C}$  NMR (101 MHz, Chloroform-*d*)  $\delta$  176.62 (d,  $J$  = 4.0 Hz), 165.58, 137.05, 134.42, 132.02, 130.48, 130.20, 129.55, 52.86.  $^{19}\text{F}$  NMR (376 MHz, Chloroform-*d*)  $\delta$  43.48, HRMS (ESI):  $m/z$  calculated for  $[\text{C}_9\text{H}_7\text{FNO}_4\text{S}]$   $[\text{M}-\text{H}]^-$ : 244.0085, found: 244.0088.

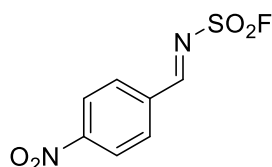

(*E*)-(4-nitrobenzylidene)sulfamoyl fluoride (**2d**)

Following the **General procedure for the preparation of imidosulfonyl fluoride**, recrystallization using n-hexane yielded **2d** as brown solid (96% yield).  $^1\text{H}$  NMR (400 MHz, Chloroform-*d*)  $\delta$  10.17 (s, 1H), 8.44 - 8.35 (m, 2H), 8.14 - 8.00 (m, 2H).  $^{13}\text{C}$  NMR (101 MHz, Chloroform-*d*)  $\delta$  190.35 (d,  $J$  = 2.5 Hz), 151.15, 140.07, 130.50, 124.31.  $^{19}\text{F}$  NMR (376 MHz, Chloroform-*d*)  $\delta$  44.73, HRMS (ESI):  $m/z$  calculated for  $[\text{C}_7\text{H}_4\text{FN}_2\text{O}_4\text{S}]$   $[\text{M}-\text{H}]^-$ : 230.9881, found: 230.9885.

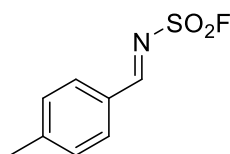

(*E*)-(4-methylbenzylidene)sulfamoyl fluoride (**2e**)

Following the **General procedure for the preparation of imidosulfonyl fluoride**, recrystallization using n-hexane yielded **2e** as light yellow solid (95% yield).  $^1\text{H}$  NMR (400 MHz, Chloroform-*d*)  $\delta$  9.04 (s, 1H), 7.91 (d,  $J$  = 8.2 Hz,

2H), 7.39 (d,  $J = 8.1$  Hz, 2H), 2.50 (s, 3H).  $^{13}\text{C}$  NMR (101 MHz, Chloroform- $d$ )  $\delta$  177.33 (d,  $J = 3.3$  Hz), 149.29, 132.56, 130.48, 128.66, 22.29.  $^{19}\text{F}$  NMR (376 MHz, Chloroform- $d$ )  $\delta$  43.92, HRMS (ESI):  $m/z$  calculated for  $[\text{C}_8\text{H}_7\text{FNO}_2\text{S}]$   $[\text{M}-\text{H}]^-$ : 200.0187, found: 200.0190.

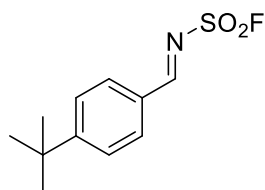

(*E*)-(4-(*tert*-butyl)benzylidene)sulfamoyl fluoride (**2f**)

Following the **General procedure for the preparation of imidosulfonyl fluoride**, recrystallization using *n*-hexane yielded **2f** as light yellow solid (96% yield).  $^1\text{H}$  NMR (400 MHz, Chloroform- $d$ )  $\delta$  9.07 (s, 1H), 7.96 (d,  $J = 8.5$  Hz, 2H), 7.61 (d,  $J = 8.5$  Hz, 2H), 1.37 (s, 9H).  $^{13}\text{C}$  NMR (101 MHz, Chloroform- $d$ )  $\delta$  177.28 (d,  $J = 3.6$  Hz), 162.04, 132.47, 128.59, 126.78, 35.79, 30.87.  $^{19}\text{F}$  NMR (376 MHz, Chloroform- $d$ )  $\delta$  43.97, HRMS (ESI):  $m/z$  calculated for  $[\text{C}_{11}\text{H}_{13}\text{FNO}_2\text{S}]$   $[\text{M}-\text{H}]^-$ : 242.0657, found: 242.0660.

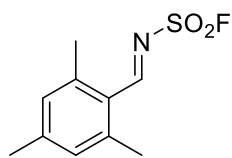

(*E*)-(2,4,6-trimethylbenzylidene)sulfamoyl fluoride (**2g**)

Following the **General procedure for the preparation of imidosulfonyl fluoride**, recrystallization using *n*-hexane yielded **2g** as light yellow solid (96% yield).  $^1\text{H}$  NMR (400 MHz, Chloroform- $d$ )  $\delta$  9.51 (s, 1H), 7.02 (s, 2H), 2.62 (s, 6H), 2.38 (s, 3H).  $^{13}\text{C}$  NMR (101 MHz, Chloroform- $d$ )  $\delta$  175.73 (d,  $J = 3.4$  Hz), 147.80, 145.17, 131.26, 125.10, 22.08, 21.86.  $^{19}\text{F}$  NMR (376 MHz, Chloroform- $d$ )  $\delta$  44.23, HRMS (ESI):  $m/z$  calculated for  $[\text{C}_{10}\text{H}_{11}\text{FNO}_2\text{S}]$   $[\text{M}-\text{H}]^-$ : 228.0500, found: 228.0505.

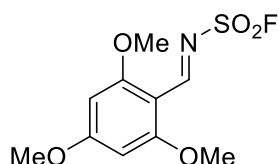

(*E*)-(2,4,6-trimethoxybenzylidene)sulfamoyl fluoride (**2h**)

Following the **General procedure for the preparation of imidosulfonyl fluoride**, recrystallization using *n*-hexane yielded **2h** as light yellow solid (96% yield).  $^1\text{H}$  NMR (400 MHz, Chloroform- $d$ )  $\delta$  9.43 (s, 1H), 6.08 (s, 2H), 3.93 (s, 9H).  $^{13}\text{C}$  NMR (101 MHz, Chloroform- $d$ )  $\delta$  170.14, 169.87, 165.70, 103.91, 90.62, 56.39, 55.95.  $^{19}\text{F}$  NMR (376 MHz, Chloroform- $d$ )  $\delta$  44.92, HRMS (ESI):  $m/z$  calculated for  $[\text{C}_{10}\text{H}_{11}\text{FNO}_5\text{S}]$   $[\text{M}-\text{H}]^-$ : 276.0347, found: 276.0350.

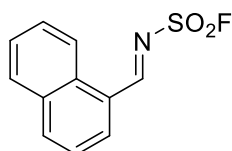

(*E*)-(naphthalen-1-ylmethylene)sulfamoyl fluoride (**2i**)

Following the **General procedure for the preparation of imidosulfonyl fluoride**, recrystallization using *n*-hexane yielded **2i** as light yellow solid (96% yield).  $^1\text{H}$  NMR (400 MHz, Chloroform- $d$ )  $\delta$  9.22 (s, 1H), 8.43 (s, 1H), 8.14 - 7.86 (m, 4H), 7.79 - 7.58 (m, 2H).  $^{13}\text{C}$  NMR (101 MHz, Chloroform- $d$ )  $\delta$  177.32 (d,  $J = 3.7$  Hz), 138.64, 137.46, 132.52,

130.77, 130.01, 129.85, 128.88, 128.29, 127.80, 123.77. <sup>19</sup>F NMR (376 MHz, Chloroform-*d*) δ 44.01, HRMS (ESI): *m/z* calculated for [C<sub>11</sub>H<sub>7</sub>FNO<sub>2</sub>S] [M-H]<sup>-</sup>: 236.0187, found: 236.0190.

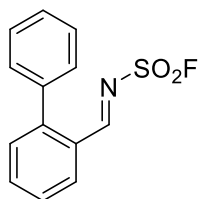

(*E*)-([1,1'-biphenyl]-2-ylmethylene)sulfamoyl fluoride (**2j**)

Following the **General procedure for the preparation of imidosulfonyl fluoride**, recrystallization using *n*-hexane yielded **2j** as light yellow solid (91% yield). <sup>1</sup>H NMR (400 MHz, DMSO-*d*<sub>6</sub>) δ 9.08 (s, 1H), 8.30 (dd, *J* = 8.0, 1.4 Hz, 1H), 7.97 – 7.87 (m, 1H), 7.72 – 7.61 (m, 2H), 7.60 – 7.51 (m, 3H), 7.49 (dd, *J* = 7.6, 1.9 Hz, 2H). <sup>13</sup>C NMR (101 MHz, DMSO-*d*<sub>6</sub>) δ 179.18 (d, *J* = 3.6 Hz), 148.76, 137.64, 137.23, 131.69, 130.70, 129.57, 129.17, 128.99, 128.65. <sup>19</sup>F NMR (376 MHz, DMSO-*d*<sub>6</sub>) δ 45.22, HRMS (ESI): *m/z* calculated for [C<sub>13</sub>H<sub>9</sub>FNO<sub>2</sub>S] [M-H]<sup>-</sup>: 262.0344, found: 262.0349.

## 2.3 Optimization of reaction conditions and general procedure

**Table S1** Investigating the effect of NFSAs

| Entry <sup>a</sup> | NFSAs     | Yield(%) <sup>b</sup>     |
|--------------------|-----------|---------------------------|
| 1                  | <b>2a</b> | <b>23(20)<sup>c</sup></b> |
| 2                  | <b>2b</b> | 20                        |
| 3                  | <b>2c</b> | 16                        |
| 4                  | <b>2d</b> | 15                        |
| 5                  | <b>2e</b> | 14                        |
| 6                  | <b>2f</b> | 15                        |
| 7                  | <b>2g</b> | 18                        |
| 8                  | <b>2h</b> | 14                        |
| 9                  | <b>2i</b> | 20                        |
| 10                 | <b>2j</b> | 17                        |

<sup>a</sup>General conditions: **3a** (1.0 equiv), **2** (3.0 equiv), [Ir(dF(CF<sub>3</sub>)ppy)<sub>2</sub>(dtbbpy)]PF<sub>6</sub> (1 mol %), CHCl<sub>3</sub> (3 mL), and nitrogen atmosphere, 30 W blue LEDs, 12 h. <sup>b</sup>Determined by <sup>19</sup>F NMR analysis using PhCF<sub>3</sub> as the internal standard. <sup>c</sup>Isolated yield.

**Table S2** Investigating the effect of solvents

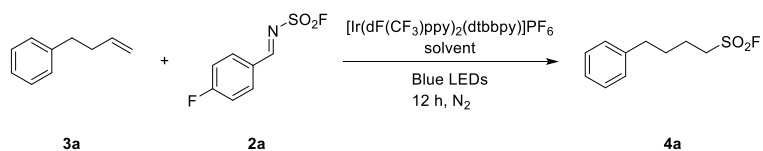

| Entry <sup>a</sup> | solvents             | Yield(%) <sup>b</sup> |
|--------------------|----------------------|-----------------------|
| 1                  | CHCl <sub>3</sub>    | 23(20) <sup>c</sup>   |
| 2                  | DCM                  | 10                    |
| 3                  | MeCN                 | N.D.                  |
| 4                  | DMF                  | N.D.                  |
| 5                  | DMSO                 | N.D.                  |
| 6                  | MeOH                 | N.D.                  |
| 7                  | DCE                  | 10                    |
| 8                  | CCl <sub>4</sub>     | trace                 |
| 9                  | Et <sub>2</sub> O    | N.D.                  |
| <b>10</b>          | <b>1,3-dioxolane</b> | <b>40</b>             |
| 11                 | Acetone              | 12                    |
| 12                 | THF                  | 20                    |
| 13                 | EA                   | trace                 |

<sup>a</sup>General conditions: **3a** (1.0 equiv), **2a** (3.0 equiv), [Ir(dF(CF<sub>3</sub>)ppy)<sub>2</sub>(dtbbpy)]PF<sub>6</sub> (1 mol %), solvent (3 mL), and nitrogen atmosphere, 30 W blue LEDs, 12 h. <sup>b</sup>Determined by <sup>19</sup>F NMR analysis using PhCF<sub>3</sub> as the internal standard. <sup>c</sup>Isolated yield.

**Table S3** Investigating the effect of additives

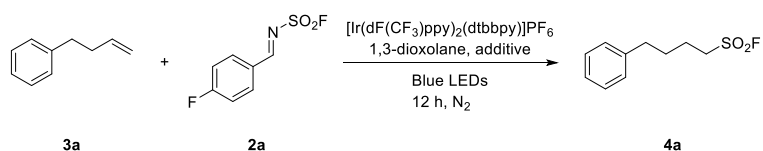

| Entry <sup>a</sup> | additives               | Yield(%) <sup>d</sup> |
|--------------------|-------------------------|-----------------------|
| 1                  | MgSO <sub>4</sub>       | 15                    |
| 2 <sup>b</sup>     | 5 Å MS                  | 18                    |
| 3                  | BnSH                    | 19                    |
| 4                  | Ph <sub>3</sub> SiH     | 39                    |
| 5                  | Et <sub>3</sub> SiH     | 38                    |
| 6                  | (TMS) <sub>3</sub> SiH  | 32                    |
| 7 <sup>c</sup>     | Ph <sub>3</sub> SiH     | 27                    |
| 8 <sup>c</sup>     | Ph(Me) <sub>2</sub> SiH | 28                    |
| 9 <sup>c</sup>     | (i-Pr) <sub>3</sub> SiH | 35                    |
| 10 <sup>c</sup>    | (MeO) <sub>3</sub> SiH  | 38                    |

|                 |                                     |                           |
|-----------------|-------------------------------------|---------------------------|
| 11 <sup>c</sup> | CH <sub>3</sub> Cl <sub>2</sub> SiH | 19                        |
| 12              | Na <sub>2</sub> CO <sub>3</sub>     | <b>60(58)<sup>e</sup></b> |
| 13              | NaHCO <sub>3</sub>                  | 50                        |
| 14              | CH <sub>3</sub> COONa               | 50                        |
| 15              | K <sub>2</sub> CO <sub>3</sub>      | 40                        |
| 16              | K <sub>3</sub> PO <sub>4</sub>      | 13                        |
| 17              | CS <sub>2</sub> CO <sub>3</sub>     | 25                        |
| 18              | NaOH                                | 13                        |
| 19              | <sup>t</sup> BuOK                   | N.D.                      |
| 20              | TMG                                 | 15                        |
| 21              | DBU                                 | N.D.                      |
| 22              | Pyridine                            | N.D.                      |
| 23              | Et <sub>3</sub> N                   | 8                         |
| 24              | DMAP                                | 5                         |

<sup>a</sup>General conditions: **3a** (1.0 equiv), **2a** (3.0 equiv), additive (1.0 equiv), [Ir(dF(CF<sub>3</sub>)ppy)<sub>2</sub>(dtbbpy)]PF<sub>6</sub> (1 mol %), 1,3-dioxolane (3 mL), and nitrogen atmosphere, 30 W blue LEDs, 12 h. <sup>b</sup>100 mg 5 Å MS was used. <sup>c</sup>1.0 equiv. additive was used. <sup>d</sup>Determined by <sup>19</sup>F NMR analysis using PhCF<sub>3</sub> as the internal standard. <sup>e</sup>Isolated yield.

**Table S4** Investigating the effect of NFSA loading

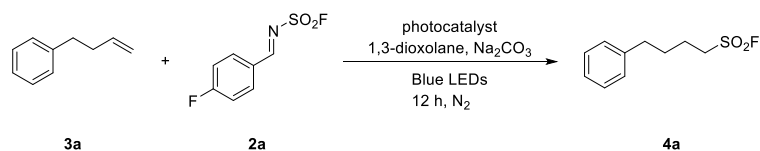

| Entry <sup>a</sup> | <b>2a</b> loading | Yield (%) <sup>b</sup>    |
|--------------------|-------------------|---------------------------|
| <b>1</b>           | <b>3.0 e.q.</b>   | <b>60(58)<sup>c</sup></b> |
| 2                  | 2.5 e.q.          | 52                        |
| 3                  | 2.0 e.q.          | 50                        |
| 4                  | 1.5 e.q.          | 44                        |
| 5                  | 1.0 e.q.          | 34                        |

<sup>a</sup>General conditions: **3a** (1.0 equiv), **2a**, Na<sub>2</sub>CO<sub>3</sub> (1.0 equiv), [Ir(dF(CF<sub>3</sub>)ppy)<sub>2</sub>(dtbbpy)]PF<sub>6</sub> (1 mol %), 1,3-dioxolane (3 mL), and nitrogen atmosphere, 30 W blue LEDs, 12 h. <sup>b</sup>Determined by <sup>19</sup>F NMR analysis using PhCF<sub>3</sub> as the internal standard. <sup>c</sup>Isolated yield.

**Table S5** Investigating the effect of photocatalyst



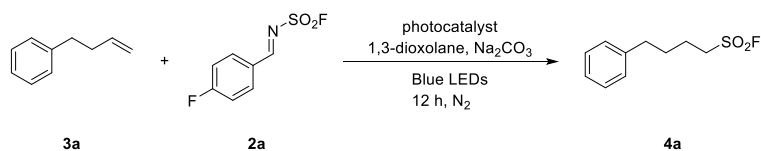

| Entry <sup>a</sup> | Photocatalyst                                                                 | Photocatalyst loading | Yield(%) <sup>b</sup>     |
|--------------------|-------------------------------------------------------------------------------|-----------------------|---------------------------|
| 1                  | <b>[Ir{dF(CF<sub>3</sub>)ppy}<sub>2</sub>(dtbbpy)]PF<sub>6</sub></b>          | <b>1%</b>             | <b>60(58)<sup>c</sup></b> |
| 2                  | [Ir{dF(CF <sub>3</sub> )ppy} <sub>2</sub> (bpy)]PF <sub>6</sub>               | 1%                    | 44                        |
| 3                  | [Ir(ppy) <sub>2</sub> (dtbbpy)]PF <sub>6</sub>                                | 1%                    | 10                        |
| 4                  | [Ir{dF(CF <sub>3</sub> )ppy} <sub>2</sub> (OMe) <sub>2</sub> ]PF <sub>6</sub> | 1%                    | 36                        |
| 5                  | [Ir{dF(CF <sub>3</sub> )ppy} <sub>2</sub> (Me) <sub>2</sub> ]PF <sub>6</sub>  | 1%                    | 50                        |
| 6                  | [Ir{dF(ppy) <sub>2</sub> (dtbbpy)]PF <sub>6</sub>                             | 1%                    | 24                        |
| 7                  | 4CzIPN                                                                        | 5 mol%                | 39                        |
| 8                  | Mes-Acr <sup>+</sup> BF <sub>4</sub> <sup>-</sup>                             | 5 mol%                | Trace                     |
| 9                  | Thioxanthone                                                                  | 5 mol%                | 44                        |
| 10                 | Eosin B                                                                       | 5 mol%                | Trace                     |
| 11                 | Eosin Y                                                                       | 5 mol%                | Trace                     |
| 12                 | Ru(bpy) <sub>3</sub> Cl <sub>2</sub>                                          | 1 mol%                | 44                        |
| 13                 | [Ir{dF(CF <sub>3</sub> )ppy} <sub>2</sub> (dtbbpy)]PF <sub>6</sub>            | 0.5%                  | 55                        |
| 14                 | [Ir{dF(CF <sub>3</sub> )ppy} <sub>2</sub> (dtbbpy)]PF <sub>6</sub>            | 2.5%                  | 48                        |
| 15                 | [Ir{dF(CF <sub>3</sub> )ppy} <sub>2</sub> (dtbbpy)]PF <sub>6</sub>            | 5%                    | 40                        |

<sup>a</sup>General conditions: **3a** (1.0 equiv), **2a** (3.0 equiv), photocatalyst, 1,3-dioxolane (3 mL), and nitrogen atmosphere, 30 W blue LEDs, 12 h. <sup>b</sup>Determined by <sup>19</sup>F NMR analysis using PhCF<sub>3</sub> as the internal standard.

<sup>c</sup>Isolated yield.

## General procedure for hydro-fluorosulfonylation of alkenes

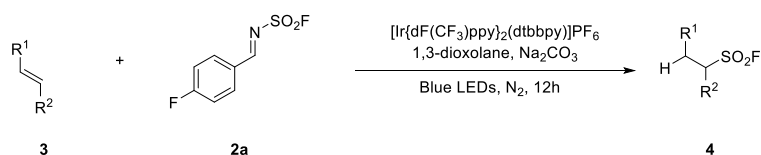

To a 10 mL Schenk tube equipped with a magnetic stirring bar, Na<sub>2</sub>CO<sub>3</sub> (0.1 mmol, 1.0 equiv.), [Ir{dF(CF<sub>3</sub>)ppy}<sub>2</sub>(dtbbpy)]PF<sub>6</sub> (1.1 mg, 0.001 mmol, 1 mol%), alkenes (0.10 mmol, 1.0 equiv.), (*E*)-(4-fluorobenzylidene)sulfamoyl fluoride (**2a**) (0.3 mmol, 3.0 equiv.) and 1,3-dioxolane (3 mL) were added, and the tube was backfilled with nitrogen. The Schlenk tube was stirred at room temperature under irradiation of 30 W blue LEDs for 12 h. The solvent was removed under reduced pressure, and then the residue was purified by flash column chromatography (PE/EA= 15:1-5:1) to afford the desired product **4**.

## 2.4 Experimental procedure for scale-up reactions

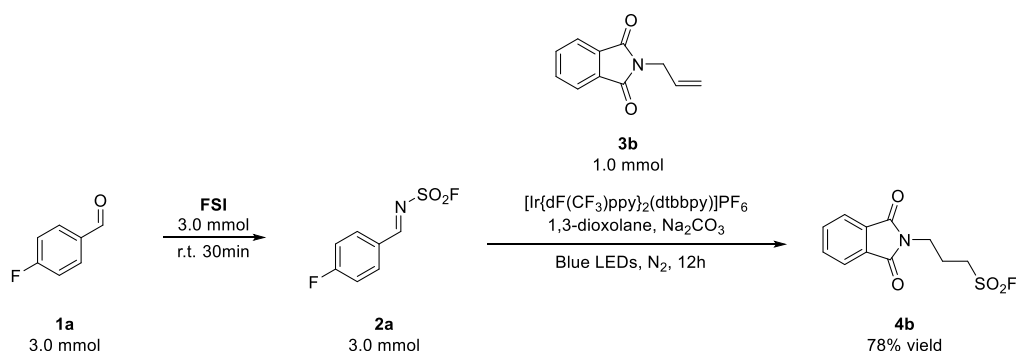

The scale-up reaction was prepared by one-pot method. To a flame-dried round-bottom-flask equipped with a magnetic stirring bar, **1a** (3.0 mmol, 3.0 equiv.) and **FSI** (3.0 mmol, 3.0 equiv.) were added into the reaction bottle. The reaction bottle was backfilled with nitrogen and reacted for 30 min at room temperature (pay attention to exhaust during the reaction). After the end of the reaction, added **3b** (1.0 mmol, 1.0 equiv.),  $[\text{Ir}\{\text{dF}(\text{CF}_3)\text{ppy}\}_2(\text{dtbbpy})]\text{PF}_6$  (11.2 mg, 0.01 mmol, 1 mol%),  $\text{Na}_2\text{CO}_3$  (1 mmol, 1.0 equiv.) and 1,3-dioxolane (30 mL). to the reaction bottle and backfill nitrogen again. The reaction mixture was then irradiated with 30 W blue LEDs for 12 h. After the reaction, the solution was purified by flash column chromatography or on silica gel to give the product **4b** in 80% yield.

## 2.5 Characterization data of compounds **4a-4al**

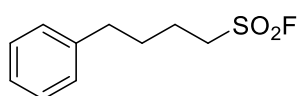

### 4-phenylbutane-1-sulfonyl fluoride (**4a**)<sup>[6]</sup>

Following the **General procedure for hydro-fluorosulfonylation of alkenes** to afford the desired product **4a** as colorless oil (58% yield).  $^1\text{H NMR}$  (400 MHz, Chloroform-*d*)  $\delta$  7.30 (t,  $J = 7.4$  Hz, 2H), 7.21 (t,  $J = 7.3$  Hz, 1H), 7.16 (d,  $J = 7.1$  Hz, 2H), 3.42 - 3.30 (m, 2H), 2.68 (t,  $J = 7.5$  Hz, 2H), 2.03 - 1.92 (m, 2H), 1.87 - 1.77 (m, 2H).  $^{13}\text{C NMR}$  (101 MHz, Chloroform-*d*)  $\delta$  140.71, 128.60, 128.34, 126.30, 50.76 (d,  $J = 16.3$  Hz), 35.06, 29.50, 22.96.  $^{19}\text{F NMR}$  (376 MHz, Chloroform-*d*)  $\delta$  53.57. **HRMS (ESI)**:  $m/z$  calculated for  $[\text{C}_{10}\text{H}_{12}\text{FO}_2\text{S}]$   $[\text{M}-\text{H}]^-$ : 215.0548, found: 215.0551.

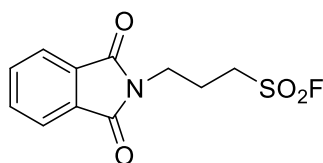

### 3-(1,3-dioxoisindolin-2-yl)propane-1-sulfonyl fluoride (**4b**)

Following the **General procedure for hydro-fluorosulfonylation of alkenes** to afford the desired product **4b** as yellow solid (74% yield).  $^1\text{H NMR}$  (400 MHz,  $\text{CDCl}_3$ )  $\delta$  7.87 (s, 2H), 7.77 (d,  $J = 3.0$  Hz, 2H), 3.88 (t,  $J = 6.3$  Hz, 2H), 3.47 (s, 2H), 2.35 (m, 2H).  $^{13}\text{C NMR}$  (101 MHz,  $\text{CDCl}_3$ )  $\delta$  168.17, 134.42, 131.75, 123.61, 48.72 (d,  $J = 18.2$  Hz), 35.78, 23.27.  $^{19}\text{F NMR}$  (376 MHz,  $\text{CDCl}_3$ )  $\delta$  53.34 (t,  $J = 4.4$  Hz). **HRMS (ESI)**:  $m/z$  calculated for  $[\text{C}_{11}\text{H}_9\text{FNO}_4\text{S}]$   $[\text{M}-\text{H}]^-$ : 270.0242, found: 270.0246.

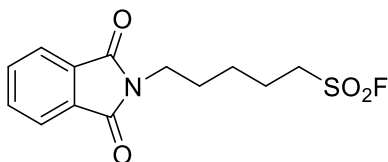

*5-(1,3-dioxisoindolin-2-yl)pentane-1-sulfonyl fluoride (4c)* <sup>[6]</sup>

Following the **General procedure for hydro-fluorosulfonylation of alkenes** to afford the desired product **4c** as brown solid (68% yield). <sup>1</sup>H NMR (400 MHz, Chloroform-*d*) δ 7.85 (dd, *J* = 5.3, 3.1 Hz, 2H), 7.73 (dd, *J* = 5.4, 3.1 Hz, 2H), 3.72 (t, *J* = 7.0 Hz, 2H), 3.51 - 3.27 (m, 2H), 2.11 - 1.97 (m, 2H), 1.83 - 1.72 (m, 2H), 1.56 (q, *J* = 8.0 Hz, 2H). <sup>13</sup>C NMR (101 MHz, Chloroform-*d*) δ 168.41, 134.08, 132.00, 123.31, 50.63 (d, *J* = 16.5 Hz), 37.21, 27.88, 25.11, 22.99. <sup>19</sup>F NMR (376 MHz, Chloroform-*d*) δ 53.43. HRMS (ESI): *m/z* calculated for [C<sub>13</sub>H<sub>14</sub>FNO<sub>4</sub>SNa<sup>+</sup>] [M+Na<sup>+</sup>]: 322.0520, found: 322.0518.

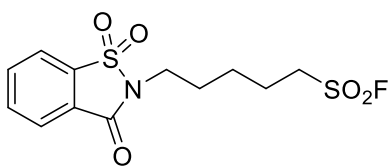

*5-(1,1-dioxido-3-oxobenzodisothiazol-2(3H)-yl)pentane-1-sulfonyl fluoride (4d)* <sup>[6]</sup>

Following the **General procedure for hydro-fluorosulfonylation of alkenes** to afford the desired product **4d** as brown solid (61% yield). <sup>1</sup>H NMR (400 MHz, Chloroform-*d*) δ 8.20 - 7.77 (m, 4H), 3.81 (t, *J* = 7.1 Hz, 2H), 3.48 - 3.29 (m, 2H), 2.15 - 1.87 (m, 4H), 1.63 (p, *J* = 7.8 Hz, 2H). <sup>13</sup>C NMR (101 MHz, Chloroform-*d*) δ 159.06, 137.62, 134.89, 134.45, 127.26, 125.23, 120.99, 50.58 (d, *J* = 16.5 Hz), 38.62, 27.60, 24.98, 22.92. <sup>19</sup>F NMR (377 MHz, Chloroform-*d*) δ 53.51. HRMS (ESI): *m/z* calculated for [C<sub>12</sub>H<sub>14</sub>FNO<sub>5</sub>S<sub>2</sub>Na<sup>+</sup>] [M+Na<sup>+</sup>]: 358.0190, found: 358.0188.

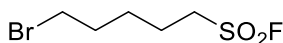

*5-bromopentane-1-sulfonyl fluoride (4e)* <sup>[6]</sup>

Following the **General procedure for hydro-fluorosulfonylation of alkenes** to afford the desired product **4e** as yellow oil (60% yield). <sup>1</sup>H NMR (400 MHz, Chloroform-*d*) δ 3.46 - 3.31 (m, 4H), 2.06 - 1.87 (m, 4H), 1.73 - 1.62 (m, 2H). <sup>13</sup>C NMR (101 MHz, Chloroform-*d*) δ 50.66 (d, *J* = 16.7 Hz), 32.55, 31.76, 26.43, 22.74. <sup>19</sup>F NMR (377 MHz, Chloroform-*d*) δ 53.66. HRMS (ESI): *m/z* calculated for [C<sub>5</sub>H<sub>9</sub>BrFO<sub>2</sub>S] [M-H]<sup>-</sup>: 230.9496, found: 230.9500.

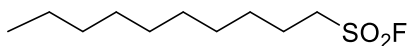

*decane-1-sulfonyl fluoride (4f)* <sup>[6]</sup>

Following the **General procedure for hydro-fluorosulfonylation of alkenes** to afford the desired product **4f** as yellow oil (57% yield). <sup>1</sup>H NMR (500 MHz, Chloroform-*d*) δ 3.41 - 3.19 (m, 2H), 2.00 - 1.80 (m, 2H), 1.62 - 1.43 (m, 2H), 1.47 - 1.37 (m, 2H), 1.33 - 1.10 (m, 10H), 1.00 - 0.65 (m, 3H). <sup>13</sup>C NMR (101 MHz, Chloroform-*d*) δ 49.90 (d, *J* = 16.8 Hz), 30.81, 28.69, 28.37, 28.16 (d, *J* = 4.8 Hz), 27.79, 26.85, 22.37, 21.63, 13.07. <sup>19</sup>F NMR (377 MHz, Chloroform-*d*) δ 53.26. HRMS (ESI): *m/z* calculated for [C<sub>10</sub>H<sub>21</sub>FO<sub>2</sub>SNa<sup>+</sup>] [M+Na<sup>+</sup>]: 247.1138, found: 247.1125.

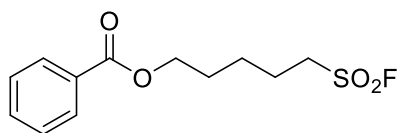

5-(fluorosulfonyl)pentyl benzoate (**4g**)<sup>[6]</sup>

Following the **General procedure for hydro-fluorosulfonylation of alkenes** to afford the desired product **4g** as brown oil (68% yield). <sup>1</sup>H NMR (400 MHz, Chloroform-*d*) δ 8.06 - 8.00 (m, 2H), 7.57 (t, *J* = 7.4 Hz, 1H), 7.45 (t, *J* = 7.7 Hz, 2H), 4.35 (t, *J* = 6.3 Hz, 2H), 3.53 - 3.28 (m, 2H), 2.14 - 1.99 (m, 2H), 1.90 - 1.80 (m, 2H), 1.74-1.63 (m, 2H). <sup>13</sup>C NMR (101 MHz, Chloroform-*d*) δ 166.56, 133.06, 130.14, 129.54, 128.43, 64.13, 50.72 (d, *J* = 16.6 Hz), 28.11, 24.62, 23.23. <sup>19</sup>F NMR (377 MHz, Chloroform-*d*) δ 53.66. HRMS (ESI): *m/z* calculated for [C<sub>12</sub>H<sub>14</sub>FO<sub>4</sub>S] [M-H]<sup>-</sup>: 273.0602, found: 273.0606.

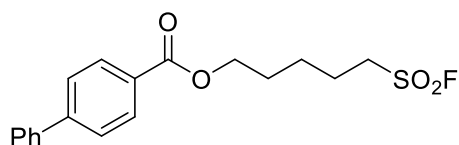

5-(fluorosulfonyl)pentyl [1,1'-biphenyl]-4-carboxylate (**4h**)<sup>[6]</sup>

Following the **General procedure for hydro-fluorosulfonylation of alkenes** to afford the desired product **4h** as brown oil (60% yield). <sup>1</sup>H NMR (400 MHz, Chloroform-*d*) δ 8.14 - 8.02 (m, 2H), 7.72 - 7.65 (m, 2H), 7.65 - 7.59 (m, 2H), 7.52 - 7.44 (m, 2H), 7.43 - 7.34 (m, 1H), 4.37 (t, *J* = 6.3 Hz, 2H), 3.45 - 3.31 (m, 2H), 2.11 - 2.01 (m, 2H), 1.94 - 1.80 (m, 2H), 1.75 - 1.58 (m, 2H). <sup>13</sup>C NMR (101 MHz, Chloroform-*d*) δ 166.45, 145.82, 139.96, 130.09, 128.97, 128.86, 128.22, 127.29, 127.12, 64.15, 50.74 (d, *J* = 16.5 Hz), 28.16, 24.65, 23.26. <sup>19</sup>F NMR (376 MHz, Chloroform-*d*) δ 53.68. HRMS (ESI): *m/z* calculated for [C<sub>18</sub>H<sub>19</sub>FO<sub>4</sub>SNa<sup>+</sup>] [M+Na<sup>+</sup>]: 373.0880, found: 373.0882.

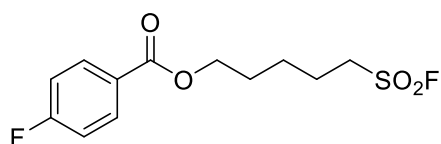

5-(fluorosulfonyl)pentyl 4-fluorobenzoate (**4i**)<sup>[6]</sup>

Following the **General procedure for hydro-fluorosulfonylation of alkenes** to afford the desired product **4i** as brown oil (65% yield). <sup>1</sup>H NMR (400 MHz, Chloroform-*d*) δ 8.19 - 8.00 (m, 2H), 7.23 - 7.04 (m, 2H), 4.34 (t, *J* = 6.4 Hz, 2H), 3.47 - 3.32 (m, 2H), 2.10 - 1.99 (m, 2H), 1.89 - 1.80 (m, 2H), 1.71 - 1.64 (m, 2H). <sup>13</sup>C NMR (101 MHz, Chloroform-*d*) δ 165.83 (d, *J* = 254.1 Hz), 165.59, 132.10 (d, *J* = 9.3 Hz), 126.35 (d, *J* = 2.8 Hz), 115.60 (d, *J* = 22.0 Hz), 64.27, 50.62, 28.10, 24.60, 23.23. <sup>19</sup>F NMR (376 MHz, Chloroform-*d*) δ 53.72, -105.51. HRMS (ESI): *m/z* calculated for [C<sub>12</sub>H<sub>14</sub>O<sub>4</sub>F<sub>2</sub>SNa<sup>+</sup>] [M+Na<sup>+</sup>]: 315.0473, found: 315.0472.

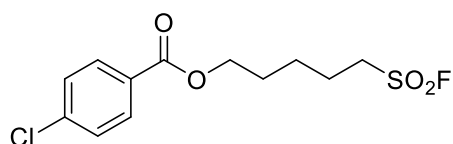

5-(fluorosulfonyl)pentyl 4-chlorobenzoate (**4j**)

Following the **General procedure for hydro-fluorosulfonylation of alkenes** to afford the desired product **4j** as light yellow oil (79% yield). <sup>1</sup>H NMR (400 MHz, Chloroform-*d*) δ 7.88 (d, *J* = 8.5 Hz, 2H), 7.34 (d, *J* = 8.6 Hz, 2H), 4.27 (t, *J* = 6.4 Hz, 2H), 3.52 - 3.27 (m, 2H), 2.11 - 1.88 (m, 2H), 1.85 - 1.74 (m, 2H), 1.68 - 1.56 (m, 2H). <sup>13</sup>C NMR (101 MHz, Chloroform-*d*) δ 165.67, 139.51, 130.95, 128.78, 128.59, 64.37, 50.69 (d, *J* = 16.6 Hz), 28.06, 24.56, 23.21. <sup>19</sup>F

**NMR (376 MHz, Chloroform-*d*)**  $\delta$  53.80. **HRMS (ESI):** *m/z* calculated for [C<sub>12</sub>H<sub>14</sub>O<sub>4</sub>ClFSNa<sup>+</sup>] [M+Na<sup>+</sup>]: 331.0178, found: 331.0180.

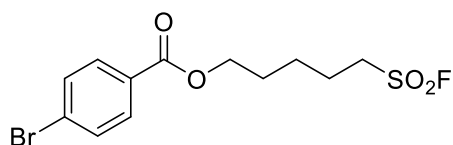

**5-(fluorosulfonyl)pentyl 4-bromobenzoate (4k)**

Following the **General procedure for hydro-fluorosulfonylation of alkenes** to afford the desired product **4k** as yellow soild (73% yield). **<sup>1</sup>H NMR (400 MHz, Chloroform-*d*)**  $\delta$  7.92 - 7.68 (m, 2H), 7.62 - 7.45 (m, 2H), 4.27 (t, *J* = 6.4 Hz, 2H), 3.56 - 3.03 (m, 2H), 2.15 - 1.92 (m, 2H), 1.92 - 1.71 (m, 2H), 1.70 - 1.53 (m, 2H). **<sup>13</sup>C NMR (101 MHz, Chloroform-*d*)**  $\delta$  165.81, 131.79, 131.08, 129.03, 128.18, 64.40, 50.70 (d, *J* = 16.6 Hz), 28.06, 24.57, 23.21. **<sup>19</sup>F NMR (376 MHz, Chloroform-*d*)**  $\delta$  53.78. **HRMS (ESI):** *m/z* calculated for [C<sub>12</sub>H<sub>14</sub>O<sub>4</sub>BrFSNa<sup>+</sup>] [M+Na<sup>+</sup>]: 374.9672, found: 374.9675.

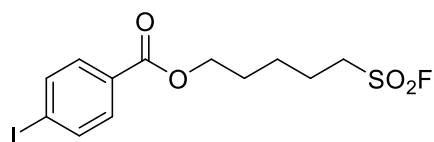

**5-(fluorosulfonyl)pentyl 4-iodobenzoate (4l)**

Following the **General procedure for hydro-fluorosulfonylation of alkenes** to afford the desired product **4l** as yellow soild (92% yield). **<sup>1</sup>H NMR (400 MHz, Chloroform-*d*)**  $\delta$  7.77 - 7.69 (m, 2H), 7.68 - 7.61 (m, 2H), 4.25 (t, *J* = 6.3 Hz, 2H), 3.65 - 3.00 (m, 2H), 2.01 - 1.89 (m, 2H), 1.81 - 1.70 (m, 2H), 1.63 - 1.53 (m, 2H). **<sup>13</sup>C NMR (101 MHz, Chloroform-*d*)**  $\delta$  166.02, 137.79, 130.99, 129.62, 100.85, 64.41, 50.68 (d, *J* = 16.5 Hz), 28.04, 24.55, 23.21. **<sup>19</sup>F NMR (376 MHz, Chloroform-*d*)**  $\delta$  53.77. **HRMS (ESI):** *m/z* calculated for [C<sub>12</sub>H<sub>14</sub>O<sub>4</sub>IFSNa<sup>+</sup>] [M+Na<sup>+</sup>]: 422.9534, found: 422.9538.

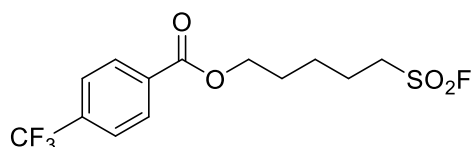

**5-(fluorosulfonyl)pentyl 4-(trifluoromethyl)benzoate (4m)** [6]

Following the **General procedure for hydro-fluorosulfonylation of alkenes** to afford the desired product **4m** as yellow oil (62% yield). **<sup>1</sup>H NMR (400 MHz, Chloroform-*d*)**  $\delta$  8.32 - 8.09 (m, 2H), 7.93 - 7.57 (m, 2H), 4.39 (t, *J* = 6.4 Hz, 2H), 3.89 - 3.28 (m, 2H), 2.45 - 1.95 (m, 2H), 1.93 - 1.81 (m, 2H), 1.77 - 1.62 (m, 2H). **<sup>13</sup>C NMR (101 MHz, Chloroform-*d*)**  $\delta$  165.3, 134.6 (q, *J* = 32.7 Hz), 133.3, 130.0, 125.5 (q, *J* = 3.7 Hz), 123.6 (q, *J* = 272.9 Hz), 64.7, 50.7 (d, *J* = 16.5 Hz), 28.0, 24.6, 23.2. **<sup>19</sup>F NMR (376 MHz, Chloroform-*d*)**  $\delta$  53.84, -63.14. **HRMS (ESI):** *m/z* calculated for [C<sub>13</sub>H<sub>14</sub>F<sub>4</sub>O<sub>4</sub>SNa<sup>+</sup>] [M+Na<sup>+</sup>]: 365.0441, found: 365.0442.

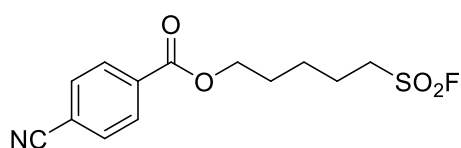

**5-(fluorosulfonyl)pentyl 4-cyanobenzoate (4n)** [6]

Following the **General procedure for hydro-fluorosulfonylation of alkenes** to afford the desired product **4n** as yellow oil (45% yield). **<sup>1</sup>H NMR (400 MHz, Chloroform-*d*)**  $\delta$  8.31 - 8.07 (m, 2H), 7.93 - 7.69 (m, 2H), 4.39 (t, *J* = 6.4 Hz,

2H), 3.60 - 3.31 (m, 2H), 2.18 - 1.98 (m, 2H), 1.95 - 1.80 (m, 2H), 1.77 - 1.57 (m, 2H).  $^{13}\text{C}$  NMR (101 MHz, Chloroform-*d*)  $\delta$  164.91, 133.91, 132.30, 130.08, 117.95, 116.53, 64.96, 50.66 (d,  $J = 16.5$  Hz), 28.01, 24.52, 23.20.  $^{19}\text{F}$  NMR (376 MHz, Chloroform-*d*)  $\delta$  53.90. HRMS (ESI):  $m/z$  calculated for  $[\text{C}_{13}\text{H}_{14}\text{FO}_4\text{NSNa}^+]$   $[\text{M}+\text{Na}^+]$ : 322.0520, found: 322.0519.

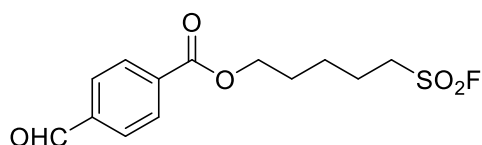

*5-(fluorosulfonyl)pentyl 4-formylbenzoate (4o)* <sup>[6]</sup>

Following the **General procedure for hydro-fluorosulfonylation of alkenes** to afford the desired product **4o** as yellow oil (64% yield).  $^1\text{H}$  NMR (400 MHz, Chloroform-*d*)  $\delta$  10.11 (s, 1H), 8.19 (d,  $J = 8.2$  Hz, 2H), 7.96 (d,  $J = 8.4$  Hz, 2H), 4.40 (t,  $J = 6.4$  Hz, 2H), 3.54 - 3.31 (m, 2H), 2.15 - 1.98 (m, 2H), 1.92-1.83 (m, 2H), 1.73 - 1.65 (m, 2H).  $^{13}\text{C}$  NMR (101 MHz, Chloroform-*d*)  $\delta$  191.57, 165.51, 139.26, 135.06, 130.16, 129.55, 64.74, 50.69 (d,  $J = 16.5$  Hz), 28.04, 24.56, 23.21.  $^{19}\text{F}$  NMR (376 MHz, Chloroform-*d*)  $\delta$  53.85. HRMS (ESI):  $m/z$  calculated for  $[\text{C}_{13}\text{H}_{15}\text{FO}_5\text{SNa}^+]$   $[\text{M}+\text{Na}^+]$ : 325.0516, found: 325.0511.

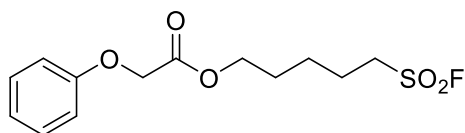

*5-(fluorosulfonyl)pentyl 2-phenoxyacetate (4p)* <sup>[6]</sup>

Following the **General procedure for hydro-fluorosulfonylation of alkenes** to afford the desired product **4p** as yellow oil (67% yield).  $^1\text{H}$  NMR (400 MHz, Chloroform-*d*)  $\delta$  7.35 - 7.27 (m, 2H), 7.08 - 6.98 (m, 1H), 6.97 - 6.87 (m, 2H), 4.64 (d,  $J = 1.7$  Hz, 2H), 4.22 (t,  $J = 6.3$  Hz, 2H), 3.34 - 3.21 (m, 2H), 1.97 - 1.85 (m, 2H), 1.79 - 1.66 (m, 2H), 1.56 - 1.39 (m, 2H).  $^{13}\text{C}$  NMR (101 MHz, Chloroform-*d*)  $\delta$  169.06, 157.81, 129.62, 121.81, 114.59, 65.31, 64.40, 50.59 (d,  $J = 16.6$  Hz), 27.81, 24.29, 23.02.  $^{19}\text{F}$  NMR (376 MHz, Chloroform-*d*)  $\delta$  53.70. HRMS (ESI):  $m/z$  calculated for  $[\text{C}_{13}\text{H}_{17}\text{FO}_5\text{SNa}^+]$   $[\text{M}+\text{Na}^+]$ : 327.0673, found: 327.0667.

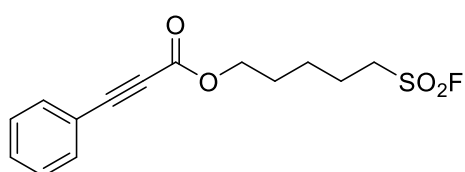

*5-(fluorosulfonyl)pentyl 3-phenylpropiolate (4q)*

Following the **General procedure for hydro-fluorosulfonylation of alkenes** to afford the desired product **4q** as brown oil (31% yield).  $^1\text{H}$  NMR (400 MHz, Chloroform-*d*)  $\delta$  7.58 - 7.48 (m, 2H), 7.43 - 7.35 (m, 1H), 7.34 - 7.27 (m, 2H), 4.18 (t,  $J = 6.3$  Hz, 2H), 3.59 - 2.99 (m, 2H), 1.97 - 1.88 (m, 2H), 1.79 - 1.66 (m, 2H), 1.61 - 1.47 (m, 2H).  $^{13}\text{C}$  NMR (101 MHz, Chloroform-*d*)  $\delta$  154.00, 133.01, 130.77, 128.63, 119.49, 86.63, 80.44, 65.17, 50.68 (d,  $J = 16.6$  Hz), 27.81, 24.45, 23.15.  $^{19}\text{F}$  NMR (376 MHz, Chloroform-*d*)  $\delta$  53.62. HRMS (ESI):  $m/z$  calculated for  $[\text{C}_{14}\text{H}_{15}\text{O}_4\text{FSNa}^+]$   $[\text{M}+\text{Na}^+]$ : 321.0567, found: 321.0577.

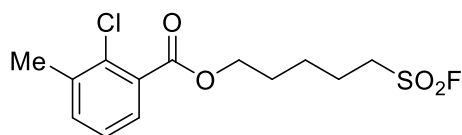

*5-(fluorosulfonyl)pentyl 2-chloro-3-methylbenzoate (4r)* <sup>[6]</sup>

Following the **General procedure for hydro-fluorosulfonylation of alkenes** to afford the desired product **4r** as brown oil (64% yield). <sup>1</sup>H NMR (400 MHz, Chloroform-*d*) δ 7.56 - 7.51 (m, 1H), 7.39 - 7.35 (m, 1H), 7.29 - 7.17 (m, 1H), 4.36 (t, *J* = 6.3 Hz, 2H), 3.52 - 3.35 (m, 2H), 2.43 (s, 3H), 2.09 - 1.97 (m, 2H), 1.88 - 1.80 (m, 2H), 1.71 - 1.63 (m, 2H). <sup>13</sup>C NMR (101 MHz, Chloroform-*d*) δ 166.62, 137.96, 133.68, 132.77, 131.34, 128.26, 126.21, 64.69, 50.71 (d, *J* = 16.5 Hz), 27.97, 24.61, 23.18, 20.66. <sup>19</sup>F NMR (376 MHz, Chloroform-*d*) δ 53.61. HRMS (ESI): *m/z* calculated for [C<sub>13</sub>H<sub>16</sub>FCIO<sub>4</sub>SNa<sup>+</sup>] [M+Na<sup>+</sup>]: 345.0334, found: 345.0334.

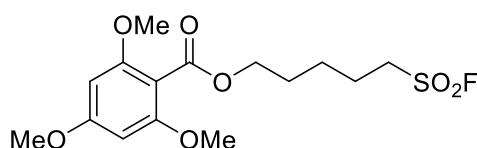

*5-(fluorosulfonyl)pentyl 2,4,6-trimethoxybenzoate (4s)*

Following the **General procedure for hydro-fluorosulfonylation of alkenes** to afford the desired product **4s** as brown oil (48% yield). <sup>1</sup>H NMR (400 MHz, Chloroform-*d*) δ 7.51 (d, *J* = 8.9 Hz, 1H), 6.63 (d, *J* = 8.9 Hz, 1H), 4.24 (t, *J* = 6.3 Hz, 2H), 3.86 (s, 3H), 3.84 (s, 3H), 3.80 (s, 3H), 3.36 - 3.28 (m, 2H), 2.09 - 1.89 (m, 2H), 1.84 - 1.68 (m, 2H), 1.68 - 1.50 (m, 2H). <sup>13</sup>C NMR (126 MHz, Chloroform-*d*) δ 164.56, 156.25, 153.66, 141.98, 125.83, 116.83, 105.93, 62.89, 60.74, 59.99, 55.08, 49.71 (d, *J* = 16.5 Hz), 27.08, 23.61, 22.19. <sup>19</sup>F NMR (376 MHz, Chloroform-*d*) δ 53.70. HRMS (ESI): *m/z* calculated for [C<sub>15</sub>H<sub>21</sub>FO<sub>7</sub>SNa<sup>+</sup>] [M+Na<sup>+</sup>]: 387.0884, found: 387.0884.

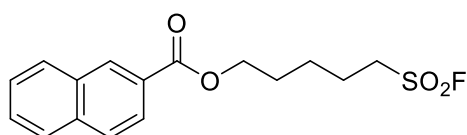

*5-(fluorosulfonyl)pentyl 2-naphthoate (4t)* <sup>[6]</sup>

Following the **General procedure for hydro-fluorosulfonylation of alkenes** to afford the desired product **4t** as yellow soild (62% yield). <sup>1</sup>H NMR (400 MHz, Chloroform-*d*) δ 8.59 (d, *J* = 1.7 Hz, 1H), 8.05 (dd, *J* = 8.6, 1.7 Hz, 1H), 7.96 (dd, *J* = 7.9, 1.5 Hz, 1H), 7.89 (dd, *J* = 8.6, 1.9 Hz, 2H), 7.65 - 7.50 (m, 2H), 4.42 (t, *J* = 6.4 Hz, 2H), 3.65 - 3.20 (m, 2H), 2.14 - 2.00 (m, 2H), 1.97 - 1.84 (m, 2H), 1.77 - 1.66 (m, 2H). <sup>13</sup>C NMR (101 MHz, Chloroform-*d*) δ 166.73, 135.59, 132.51, 131.06, 129.37, 128.35, 128.25, 127.79, 127.36, 126.74, 125.14, 64.29, 50.75 (d, *J* = 16.6 Hz), 28.18, 24.69, 23.28. <sup>19</sup>F NMR (376 MHz, Chloroform-*d*) δ 53.72. HRMS (ESI): *m/z* calculated for [C<sub>16</sub>H<sub>18</sub>FO<sub>4</sub>S<sup>+</sup>] [M+H<sup>+</sup>]: 325.0904, found: 325.0908

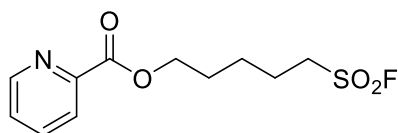

*5-(fluorosulfonyl)pentyl picolinate (4u)* <sup>[6]</sup>

Following the **General procedure for hydro-fluorosulfonylation of alkenes** to afford the desired product **4u** as colorless oil (62% yield). <sup>1</sup>H NMR (400 MHz, Chloroform-*d*) δ 8.77 (d, *J* = 4.3 Hz, 1H), 8.13 (d, *J* = 7.8 Hz, 1H), 8.05 - 7.79 (m, 1H), 7.50 (dd, *J* = 6.7, 4.9 Hz, 1H), 4.45 (t, *J* = 6.5 Hz, 2H), 3.54 - 3.30 (m, 2H), 2.09 - 2.01 (m, 2H), 1.97 -

1.86 (m, 2H), 1.70 - 1.65 (m, 2H).  $^{13}\text{C}$  NMR (101 MHz, Chloroform-*d*)  $\delta$  165.24, 149.94, 147.95, 137.09, 127.03, 125.20, 65.08, 50.67 (d,  $J = 16.5$  Hz), 27.99, 24.56, 23.19.  $^{19}\text{F}$  NMR (376 MHz, Chloroform-*d*)  $\delta$  53.54. HRMS (ESI):  $m/z$  calculated for  $[\text{C}_{11}\text{H}_{14}\text{FNO}_4\text{SNa}^+]$   $[\text{M}+\text{Na}^+]$ : 298.0520, found: 298.0506.

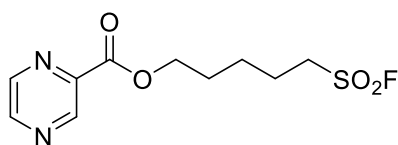

5-(fluorosulfonyl)pentyl pyrazine-2-carboxylate (**4v**)<sup>[6]</sup>

Following the **General procedure for hydro-fluorosulfonylation of alkenes** to afford the desired product **4v** as brown oil (63% yield).  $^1\text{H}$  NMR (400 MHz, Chloroform-*d*)  $\delta$  9.31 (s, 1H), 8.92 - 8.66 (m, 2H), 4.48 (t,  $J = 6.5$  Hz, 2H), 3.49 - 3.36 (m, 2H), 2.11 - 2.00 (m, 2H), 1.99 - 1.87 (m, 2H), 1.74 - 1.64 (m, 2H).  $^{13}\text{C}$  NMR (101 MHz, Chloroform-*d*)  $\delta$  163.95, 147.78, 146.27, 144.47, 143.33, 65.47, 50.63 (d,  $J = 16.8$  Hz), 27.91, 24.50, 23.15.  $^{19}\text{F}$  NMR (376 MHz, Chloroform-*d*)  $\delta$  53.67. HRMS (ESI):  $m/z$  calculated for  $[\text{C}_{10}\text{H}_{14}\text{FN}_2\text{O}_4\text{S}^+]$   $[\text{M}+\text{H}^+]$ : 277.0653, found: 277.0655.

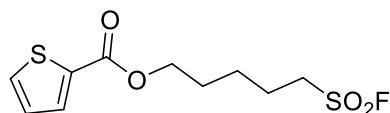

5-(fluorosulfonyl)pentyl thiophene-2-carboxylate (**4w**)<sup>[6]</sup>

Following the **General procedure for hydro-fluorosulfonylation of alkenes** to afford the desired product **4w** as brown oil (68% yield).  $^1\text{H}$  NMR (400 MHz, Chloroform-*d*)  $\delta$  7.80 (dd,  $J = 3.7, 1.3$  Hz, 1H), 7.57 (dd,  $J = 5.0, 1.3$  Hz, 1H), 7.11 (dd,  $J = 5.0, 3.7$  Hz, 1H), 4.33 (t,  $J = 6.3$  Hz, 2H), 3.45 - 3.31 (m, 2H), 2.16 - 1.98 (m, 2H), 1.93 - 1.78 (m, 2H), 1.73 - 1.58 (m, 2H).  $^{13}\text{C}$  NMR (101 MHz, Chloroform-*d*)  $\delta$  162.18, 133.59, 133.53, 132.50, 127.83, 64.29, 50.72 (d,  $J = 16.5$  Hz), 28.07, 24.58, 23.20.  $^{19}\text{F}$  NMR (376 MHz, Chloroform-*d*)  $\delta$  53.67. HRMS (ESI):  $m/z$  calculated for  $[\text{C}_{10}\text{H}_{13}\text{FO}_4\text{S}_2\text{Na}^+]$   $[\text{M}+\text{Na}^+]$ : 303.0131, found: 303.0141.

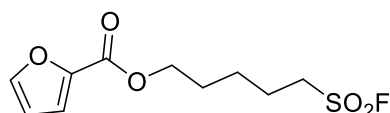

5-(fluorosulfonyl)pentyl furan-2-carboxylate (**4x**)<sup>[6]</sup>

Following the **General procedure for hydro-fluorosulfonylation of alkenes** to afford the desired product **4x** as brown oil (64% yield).  $^1\text{H}$  NMR (400 MHz, Chloroform-*d*)  $\delta$  7.59 (d,  $J = 1.7$  Hz, 1H), 7.19 (d,  $J = 3.5$  Hz, 1H), 6.52 (dd,  $J = 3.6, 1.8$  Hz, 1H), 4.34 (t,  $J = 6.3$  Hz, 2H), 3.43 - 3.32 (m, 2H), 2.12 - 1.97 (m, 2H), 1.93 - 1.80 (m, 2H), 1.76 - 1.58 (m, 2H).  $^{13}\text{C}$  NMR (101 MHz, Chloroform-*d*)  $\delta$  158.67, 146.42, 144.55, 118.08, 111.91, 64.10, 50.69 (d,  $J = 16.5$  Hz), 28.01, 24.55, 23.17.  $^{19}\text{F}$  NMR (376 MHz, Chloroform-*d*)  $\delta$  53.62. HRMS (ESI):  $m/z$  calculated for  $[\text{C}_{10}\text{H}_{13}\text{FO}_5\text{SNa}^+]$   $[\text{M}+\text{Na}^+]$ : 287.0360, found: 287.0351.

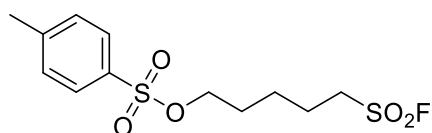

5-(fluorosulfonyl)pentyl 4-methylbenzenesulfonate (**4y**)<sup>[6]</sup>

Following the **General procedure for hydro-fluorosulfonylation of alkenes** to afford the desired product **4y** as brown oil (62% yield).  $^1\text{H}$  NMR (400 MHz, Chloroform-*d*)  $\delta$  7.79 (d,  $J = 8.3$  Hz, 2H), 7.36 (d,  $J = 8.2$  Hz, 2H), 4.05 (t,  $J = 6.1$  Hz, 2H), 3.43 - 3.24 (m, 2H), 2.46 (s, 3H), 1.97 - 1.86 (m, 2H), 1.77 - 1.68 (m, 2H), 1.55 (q,  $J = 8.3$  Hz, 2H).  $^{13}\text{C}$



**NMR (101 MHz, Chloroform-*d*)**  $\delta$  145.03, 132.90, 129.96, 127.87, 69.47, 50.55 (d,  $J = 16.7$  Hz), 28.18, 23.93, 22.88, 21.65.  **$^{19}\text{F}$  NMR (376 MHz, Chloroform-*d*)**  $\delta$  53.69. **HRMS (ESI):**  $m/z$  calculated for  $[\text{C}_{12}\text{H}_{17}\text{FO}_5\text{S}_2\text{Na}^+]$   $[\text{M}+\text{Na}^+]$ : 347.0394, found: 347.0385.

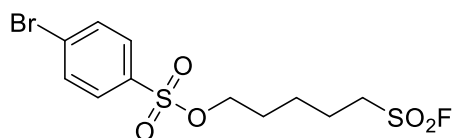

*5-(fluorosulfonyl)pentyl 4-bromobenzenesulfonate (4z)* <sup>[6]</sup>

Following the **General procedure for hydro-fluorosulfonylation of alkenes** to afford the desired product **4z** as brown solid (65% yield).  **$^1\text{H}$  NMR (400 MHz, Chloroform-*d*)**  $\delta$  8.04 - 7.57 (m, 4H), 4.09 (t,  $J = 6.1$  Hz, 2H), 3.53 - 3.04 (m, 2H), 2.04 - 1.88 (m, 2H), 1.84 - 1.71 (m, 2H), 1.65 - 1.48 (m, 2H).  **$^{13}\text{C}$  NMR (101 MHz, Chloroform-*d*)**  $\delta$  134.93, 132.72, 129.33, 129.21, 70.01, 50.54 (d,  $J = 16.7$  Hz), 28.25, 23.95, 22.94.  **$^{19}\text{F}$  NMR (376 MHz, Chloroform-*d*)**  $\delta$  53.90. **HRMS (ESI):**  $m/z$  calculated for  $[\text{C}_{11}\text{H}_{13}\text{BrFO}_5\text{S}_2]$   $[\text{M}-\text{H}]^-$ : 386.9377, found: 386.9383.

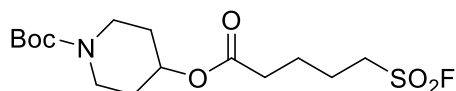

*tert-butyl 4-((5-(fluorosulfonyl)pentanoyl)oxy)piperidine-1-carboxylate (4aa)* <sup>[6]</sup>

Following the **General procedure for hydro-fluorosulfonylation of alkenes** to afford the desired product **4aa** as brown oil (68% yield).  **$^1\text{H}$  NMR (400 MHz, Chloroform-*d*)**  $\delta$  4.99 - 4.88 (m, 1H), 3.73 (d,  $J = 12.7$  Hz, 2H), 3.47 - 3.35 (m, 2H), 3.25 - 3.15 (m, 2H), 2.40 (t,  $J = 7.1$  Hz, 2H), 2.09 - 1.96 (m, 2H), 1.94 - 1.83 (m,  $J = 7.5$  Hz, 4H), 1.64 - 1.55 (m, 2H), 1.46 (s, 9H).  **$^{13}\text{C}$  NMR (101 MHz, Chloroform-*d*)**  $\delta$  171.78, 154.72, 79.78, 70.28, 50.52 (d,  $J = 16.7$  Hz), 33.47, 30.60, 29.70, 28.41, 23.10, 22.91.  **$^{19}\text{F}$  NMR (377 MHz, Chloroform-*d*)**  $\delta$  53.75. **HRMS (ESI):**  $m/z$  calculated for  $[\text{C}_{15}\text{H}_{26}\text{FNO}_6\text{SNa}^+]$   $[\text{M}+\text{Na}^+]$ : 390.1357, found: 390.1356.

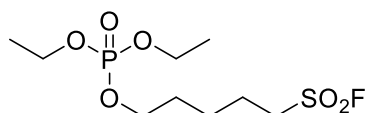

*diethyl (5-(fluorosulfonyl)pentyl) phosphate (4ab)* <sup>[6]</sup>

Following the **General procedure for hydro-fluorosulfonylation of alkenes** to afford the desired product **4ab** as brown oil (62% yield).  **$^1\text{H}$  NMR (400 MHz, Chloroform-*d*)**  $\delta$  4.24 - 3.94 (m, 6H), 3.44 - 3.32 (m, 2H), 2.07 - 1.93 (m, 2H), 1.85 - 1.70 (m, 2H), 1.69 - 1.56 (m, 2H), 1.40 - 1.31 (m, 6H).  **$^{13}\text{C}$  NMR (101 MHz, Chloroform-*d*)**  $\delta$  66.63 (d,  $J = 5.9$  Hz), 63.84 (d,  $J = 5.9$  Hz), 50.71 (d,  $J = 16.5$  Hz), 29.51 (d,  $J = 6.9$  Hz), 24.07, 23.06, 16.16 (d,  $J = 6.6$  Hz).  **$^{19}\text{F}$  NMR (376 MHz, Chloroform-*d*)**  $\delta$  53.67.  **$^{31}\text{P}$  NMR (162 MHz, Chloroform-*d*)**  $\delta$  -0.92. **HRMS (ESI):**  $m/z$  calculated for  $[\text{C}_9\text{H}_{21}\text{FO}_6\text{PS}^+]$   $[\text{M}+\text{H}^+]$ : 307.0775, found: 307.0774.

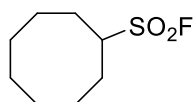

*cyclooctanesulfonyl fluoride (4ac)* <sup>[6]</sup>

Following the **General procedure for hydro-fluorosulfonylation of alkenes** to afford the desired product **4ac** as brown oil (68% yield).  **$^1\text{H}$  NMR (400 MHz, Chloroform-*d*)**  $\delta$  3.61 - 3.38 (m, 1H), 2.39 - 2.22 (m, 2H), 2.05 - 1.77 (m, 4H),

1.72 - 1.52 (m, 8H).  $^{13}\text{C}$  NMR (101 MHz, Chloroform-*d*)  $\delta$  62.23 (d,  $J = 10.3$  Hz), 29.71, 26.61, 25.98, 24.66.  $^{19}\text{F}$  NMR (376 MHz, Chloroform-*d*)  $\delta$  41.08. HRMS (ESI):  $m/z$  calculated for  $[\text{C}_8\text{H}_{14}\text{FO}_2\text{S}]$   $[\text{M}-\text{H}]^-$ : 193.0704, found: 193.0707.

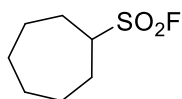

cycloheptanesulfonyl fluoride (**4ad**)<sup>[7]</sup>

Following the **General procedure for hydro-fluorosulfonylation of alkenes** to afford the desired product **4ad** as colorless oil (57% yield).  $^1\text{H}$  NMR (400 MHz, Chloroform-*d*)  $\delta$  3.44 – 3.28 (m, 1H), 2.33 – 2.22 (m, 2H), 1.96 – 1.74 (m, 4H), 1.60 – 1.41 (m, 6H).  $^{13}\text{C}$  NMR (101 MHz, Chloroform-*d*)  $\delta$  61.80 (d,  $J = 10.2$  Hz), 27.12, 27.04, 24.31.  $^{19}\text{F}$  NMR (376 MHz, Chloroform-*d*)  $\delta$  41.47. HRMS (ESI):  $m/z$  calculated for  $[\text{C}_7\text{H}_{12}\text{FO}_2\text{S}]$   $[\text{M}-\text{H}]^-$ : 179.0548, found: 179.0549.

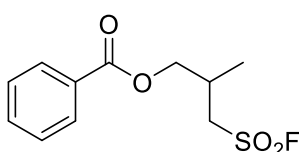

3-(fluorosulfonyl)-2-methylpropyl benzoate (**4ae**)<sup>[6]</sup>

Following the **General procedure for hydro-fluorosulfonylation of alkenes** to afford the desired product **4ae** as yellow oil (63% yield).  $^1\text{H}$  NMR (400 MHz, Chloroform-*d*)  $\delta$  8.03 (d,  $J = 7.7$  Hz, 2H), 7.60 (t,  $J = 7.4$  Hz, 1H), 7.47 (t,  $J = 7.6$  Hz, 2H), 4.43 – 4.22 (m, 2H), 3.73 – 3.57 (m, 1H), 3.47 – 3.25 (m, 1H), 2.85 – 2.63 (m, 1H), 1.32 (d,  $J = 6.9$  Hz, 3H).  $^{13}\text{C}$  NMR (101 MHz, Chloroform-*d*)  $\delta$  166.1, 133.5, 129.6, 129.5, 128.6, 66.9, 54.2 (d,  $J = 15.8$  Hz), 29.9, 16.4.  $^{19}\text{F}$  NMR (376 MHz, Chloroform-*d*)  $\delta$  59.02. HRMS (ESI):  $m/z$  calculated for  $[\text{C}_{11}\text{H}_{13}\text{O}_4\text{FSNa}^+]$   $[\text{M}+\text{Na}^+]$ : 283.0411, found: 283.0413.

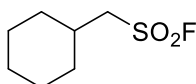

cyclohexylmethanesulfonyl fluoride (**4af**)

Following the **General procedure for hydro-fluorosulfonylation of alkenes** to afford the desired product **4af** as colorless oil (47% yield).  $^1\text{H}$  NMR (400 MHz, Chloroform-*d*)  $\delta$  3.47 – 3.42 (m, 2H), 1.80 – 1.66 (m, 4H), 1.54 – 1.43 (m, 1H), 1.33 – 1.12 (m, 4H), 1.02 – 0.87 (m, 2H).  $^{13}\text{C}$  NMR (101 MHz, Chloroform-*d*)  $\delta$  68.82, 40.51, 29.57, 26.60, 25.85.  $^{19}\text{F}$  NMR (376 MHz, Chloroform-*d*)  $\delta$  53.45. HRMS (ESI):  $m/z$  calculated for  $[\text{C}_7\text{H}_{12}\text{FO}_2\text{S}]$   $[\text{M}-\text{H}]^-$ : 179.0548, found: 179.0543.

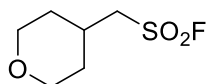

(tetrahydro-2H-pyran-4-yl)methanesulfonyl fluoride (**4ag**)

Following the **General procedure for hydro-fluorosulfonylation of alkenes** to afford the desired product **4ag** as colorless oil (59% yield).  $^1\text{H}$  NMR (400 MHz, Chloroform-*d*)  $\delta$  3.98 (m, 2H), 3.43 (m, 2H), 2.29 (d,  $J = 7.1$  Hz, 2H), 2.03 (m, 1H), 1.69 (m, 2H), 1.38 (m, 2H).  $^{13}\text{C}$  NMR (101 MHz, Chloroform-*d*)  $\delta$  67.64, 41.08, 32.53, 31.78.  $^{19}\text{F}$  NMR (376 MHz, Chloroform-*d*)  $\delta$  53.56. HRMS (ESI):  $m/z$  calculated for  $[\text{C}_6\text{H}_{10}\text{FO}_3\text{S}]$   $[\text{M}-\text{H}]^-$ : 181.0340, found: 181.0343.

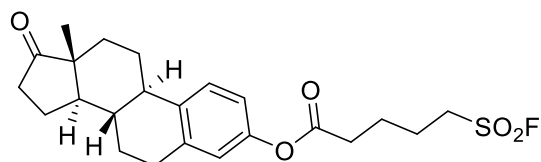

(8*S*,9*R*,13*R*)-13-methyl-17-oxo-7,8,9,11,12,13,14,15,16,17-decahydro-6*H*-cyclopenta[*a*]phenanthren-3-yl 5-(fluorosulfonyl)pentanoate (**4ah**)<sup>[6]</sup>

Following the **General procedure for hydro-fluorosulfonylation of alkenes** to afford the desired product **4ad** as yellow solid (52% yield). <sup>1</sup>H NMR (400 MHz, Chloroform-*d*) δ 7.30 - 7.27 (m, 1H), 6.87 - 6.83 (m, 1H), 6.80 (d, *J* = 2.5 Hz, 1H), 3.58 - 3.22 (m, 2H), 2.91 (dd, *J* = 8.6, 3.9 Hz, 2H), 2.64 (t, *J* = 7.1 Hz, 2H), 2.58 - 2.51 (m, 1H), 2.45 - 2.36 (m, 1H), 2.33 - 2.25 (m, 1H), 2.22 - 2.02 (m, 4H), 2.01 - 1.85 (m, 4H), 1.74 - 1.38 (m, 7H), 0.91 (s, 3H). <sup>13</sup>C NMR (101 MHz, Chloroform-*d*) δ 171.31, 148.35, 138.15, 137.63, 126.49, 121.44, 118.60, 50.63, 50.47, 50.44, 47.95, 44.16, 38.00, 35.86, 33.33, 31.56, 29.41, 26.32, 25.76, 23.07, 22.93, 21.60, 13.84. <sup>19</sup>F NMR (376 MHz, Chloroform-*d*) δ 53.82. HRMS (ESI): *m/z* calculated for [C<sub>23</sub>H<sub>29</sub>FO<sub>5</sub>SNa<sup>+</sup>] [M+Na<sup>+</sup>]: 459.1612, found: 459.1611.

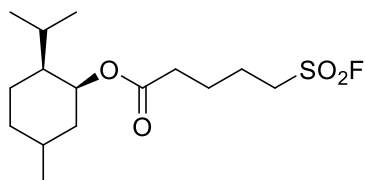

(1*S*,2*S*)-2-isopropyl-5-methylcyclohexyl 5-(fluorosulfonyl)pentanoate (**4ai**)<sup>[6]</sup>

Following the **General procedure for hydro-fluorosulfonylation of alkenes** to afford the desired product **4ae** as brown oil (61% yield). <sup>1</sup>H NMR (400 MHz, Chloroform-*d*) δ 4.76 - 4.58 (m, 1H), 3.45 - 3.32 (m, 2H), 2.37 (t, *J* = 7.1 Hz, 2H), 2.09 - 1.90 (m, 3H), 1.90 - 1.77 (m, 3H), 1.74 - 1.62 (m, 3H), 1.56 - 1.45 (m, 1H), 1.43 - 1.31 (m, 1H), 1.15 - 0.95 (m, 2H), 0.93 - 0.78 (m, 6H), 0.76 (d, *J* = 7.0 Hz, 3H). <sup>13</sup>C NMR (101 MHz, Chloroform-*d*) δ 172.05, 74.61, 50.56 (d, *J* = 16.8 Hz), 47.00, 40.94, 34.20, 33.60, 31.39, 26.38, 23.41, 23.24, 22.93, 22.00, 20.74, 16.28. <sup>19</sup>F NMR (376 MHz, Chloroform-*d*) δ 53.56. HRMS (ESI): *m/z* calculated for [C<sub>15</sub>H<sub>27</sub>FO<sub>4</sub>SNa<sup>+</sup>] [M+Na<sup>+</sup>]: 345.1506, found: 345.1499.

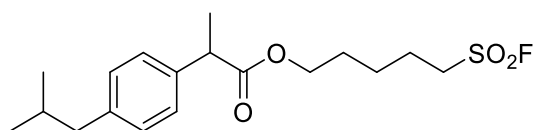

5-(fluorosulfonyl)pentyl 2-(4-isobutylphenyl)propanoate (**4aj**)<sup>[6]</sup>

Following the **General procedure for hydro-fluorosulfonylation of alkenes** to afford the desired product **4af** as brown oil (50% yield). <sup>1</sup>H NMR (400 MHz, Chloroform-*d*) δ 7.19 (dd, *J* = 8.1, 2.2 Hz, 2H), 7.14 - 7.06 (m, 2H), 4.17 - 3.95 (m, 2H), 3.68 (q, *J* = 7.0 Hz, 1H), 3.30 - 3.18 (m, 2H), 2.45 (dd, *J* = 7.2, 2.1 Hz, 2H), 1.93 - 1.76 (m, 3H), 1.72 - 1.55 (m, 2H), 1.52 - 1.46 (m, 3H), 1.45 - 1.35 (m, 2H), 0.90 (dd, *J* = 6.7, 2.1 Hz, 6H). <sup>13</sup>C NMR (101 MHz, Chloroform-*d*) δ 174.71, 140.66, 137.77, 129.35, 127.15, 63.69, 50.61 (d, *J* = 16.5 Hz), 45.16, 44.98, 30.21, 27.78, 24.28, 22.98, 22.37, 18.29. <sup>19</sup>F NMR (377 MHz, Chloroform-*d*) δ 53.50. HRMS (ESI): *m/z* calculated for [C<sub>18</sub>H<sub>27</sub>FO<sub>4</sub>SNa<sup>+</sup>] [M+Na<sup>+</sup>]: 381.1506, found: 381.1506.

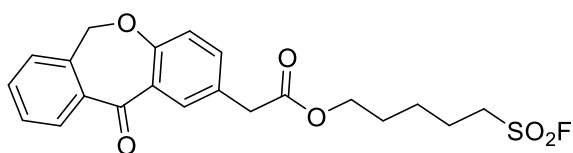

4-(fluorosulfonyl)butyl 2-(11-oxo-6,11-dihydrodibenzo[b,e]oxepin-2-yl)acetate (**4ak**)<sup>[6]</sup>

Following the **General procedure for hydro-fluorosulfonylation of alkenes** to afford the desired product **4ag** as brown oil (64% yield). <sup>1</sup>H NMR (400 MHz, Chloroform-*d*) δ 8.12 (d, *J* = 2.4 Hz, 1H), 7.89 (dd, *J* = 7.7, 1.4 Hz, 1H), 7.60 - 7.52 (m, 1H), 7.51 - 7.45 (m, 1H), 7.41 (dd, *J* = 8.4, 2.4 Hz, 1H), 7.36 (dd, *J* = 7.4, 1.3 Hz, 1H), 7.03 (d, *J* = 8.4 Hz, 1H), 5.19 (s, 2H), 4.13 (t, *J* = 6.3 Hz, 2H), 3.64 (s, 2H), 3.47 - 3.33 (m, 2H), 2.16 - 1.87 (m, 2H), 1.76 - 1.64 (m, 2H), 1.60 - 1.48 (m, 2H). <sup>13</sup>C NMR (101 MHz, Chloroform-*d*) δ 189.82, 170.32, 159.49, 139.35, 135.29, 134.55, 131.84, 131.34, 128.45, 128.29, 126.84, 126.73, 124.18, 120.10, 72.63, 63.11, 49.63 (d, *J* = 16.5 Hz), 39.27, 28.68, 26.88, 23.43, 22.11. <sup>19</sup>F NMR (377 MHz, Chloroform-*d*) δ 53.64. HRMS (APCI): *m/z* calculated for [C<sub>21</sub>H<sub>22</sub>FO<sub>6</sub>S<sup>+</sup>] [M+H<sup>+</sup>]: 421.1116, found: 421.1115.

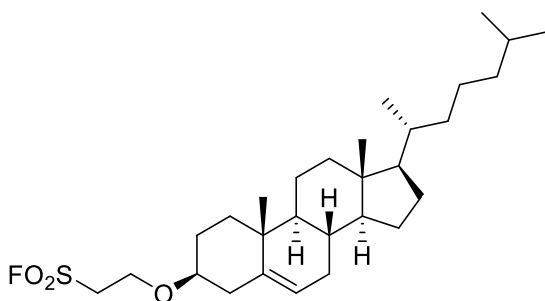

2-(((3*S*,8*S*,9*S*,10*R*,13*R*,14*S*,17*R*)-10,13-dimethyl-17-((*R*)-6-methylheptan-2-yl)-2,3,4,7,8,9,10,11,12,13,14,15,16,17-tetradecahydro-1*H*-cyclopenta[*a*]phenanthren-3-yl)oxy)ethane-1-sulfonyl fluoride (**4al**)<sup>[6]</sup>

Following the **General procedure for hydro-fluorosulfonylation of alkenes** to afford the desired product **4ah** as white solid (54% yield). <sup>1</sup>H NMR (400 MHz, Chloroform-*d*) δ 5.42 - 5.32 (m, 1H), 4.02 - 3.87 (m, 2H), 3.74 - 3.51 (m, 2H), 3.35 - 3.14 (m, 1H), 2.39 - 2.31 (m, 1H), 2.29 - 2.17 (m, 1H), 2.12 - 1.94 (m, 2H), 1.93 - 1.75 (m, 3H), 1.65 - 1.42 (m, 7H), 1.41 - 1.30 (m, 4H), 1.22 - 1.08 (m, 7H), 1.07 - 0.96 (m, 6H), 0.91 (d, *J* = 6.5 Hz, 3H), 0.86 (dd, *J* = 6.6, 1.9 Hz, 6H), 0.68 (s, 3H). <sup>13</sup>C NMR (101 MHz, Chloroform-*d*) δ 140.21, 122.19, 80.14, 60.91, 56.75, 56.16, 51.65 (d, *J* = 15.4 Hz), 50.15, 42.33, 39.76, 39.53, 38.73, 37.04, 36.82, 36.20, 35.80, 31.90 (d, *J* = 6.5 Hz), 29.72, 28.24, 28.07 (d, *J* = 7.1 Hz), 24.30, 23.84, 22.84, 22.58, 21.08, 19.36, 18.73, 11.87. <sup>19</sup>F NMR (376 MHz, Chloroform-*d*) δ 58.96. HRMS (APCI): *m/z* calculated for [C<sub>29</sub>H<sub>50</sub>FO<sub>3</sub>S<sup>+</sup>] [M+H<sup>+</sup>]: 497.3459, found: 497.3456.

## 2.6 Experimental procedure for synthetic applications

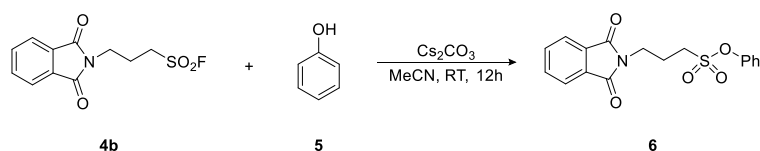

To a 10 mL round-bottomed flask equipped with a magnetic stir bar, **4b** (27.1 mg, 0.10 mmol, 1.0 eq.), phenol **5** (10.4 mg, 0.11 mmol, 1.1 eq) and Cs<sub>2</sub>CO<sub>3</sub> (65.2 mg, 0.20 mmol, 2.0 eq.) in MeCN (1 mL) were added. Stir the reaction mixture for 12 hours at 25 °C under nitrogen. After completion of the reaction, purify the residue by silica gel column chromatography (PE/EA = 5:1) and product **6** was obtained in 76% yield (26.2 mg). <sup>1</sup>H NMR (400 MHz, CDCl<sub>3</sub>) δ 7.91 - 7.81 (m, 2H), 7.79 - 7.70 (m, 2H), 7.37 (t, *J* = 7.7 Hz, 2H), 7.32 - 7.21 (m, 3H), 3.87 (t, *J* = 6.7 Hz, 2H), 3.57 - 3.06 (m,

2H), 2.41 - 2.34 (m, 2H).  $^{13}\text{C}$  NMR (101 MHz,  $\text{CDCl}_3$ )  $\delta$  168.18, 148.95, 134.30, 131.84, 130.01, 127.31, 123.51, 122.00, 48.13, 36.11, 23.33. HRMS (ESI):  $m/z$  calculated for  $[\text{C}_{17}\text{H}_{14}\text{NO}_5\text{S}]$   $[\text{M}-\text{H}]^-$ : 344.0598, found: 344.0560.

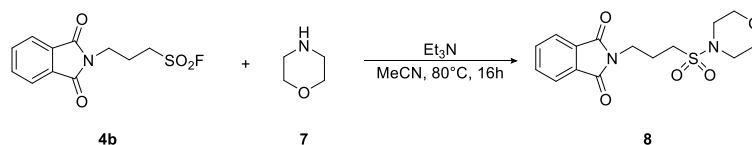

To a 10 mL round-bottomed flask equipped with a magnetic stir bar, **4b** (27.1 mg, 0.10 mmol, 1.0 eq.), morpholine **7** (17.4 mg, 0.2 mmol, 2.0 eq.), triethylamine (28  $\mu\text{L}$ , 0.2 mmol, 2.0 eq.), and MeCN (0.5 mL) were added. Stir the reaction mixture for 16 hours at 80°C under nitrogen. After completion of the reaction, purify the residue by silica gel column chromatography (PE/EA = 3:1) and the product **8** was obtained in 82% yield (27.7 mg).  $^1\text{H}$  NMR (400 MHz,  $\text{CDCl}_3$ )  $\delta$  7.89 - 7.81 (m, 2H), 7.78 - 7.70 (m, 2H), 3.83 (t,  $J$  = 6.7 Hz, 2H), 3.78 - 3.69 (m, 4H), 3.31 - 3.21 (m, 4H), 3.12 - 2.92 (m, 2H), 2.25 - 2.17 (m, 2H).  $^{13}\text{C}$  NMR (101 MHz,  $\text{CDCl}_3$ )  $\delta$  168.27, 134.26, 131.89, 123.47, 66.59, 46.71, 45.83, 36.50, 22.82. HRMS (ESI):  $m/z$  calculated for  $[\text{C}_{15}\text{H}_{17}\text{N}_2\text{O}_5\text{S}]$   $[\text{M}-\text{H}]^-$ : 337.0864, found: 337.0868.

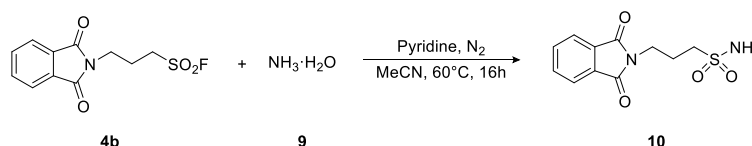

To a 10 mL round-bottomed flask equipped with a magnetic stir bar, **4b** (27.1 mg, 0.10 mmol, 1.0 eq.),  $\text{NH}_3\cdot\text{H}_2\text{O}$  **9** (143  $\mu\text{L}$ , 2.0 mmol, 20.0 eq.), pyridine (31.7 mg, 0.4 mmol, 2.0 eq.), and MeCN (2 mL) were added. Stir the reaction mixture for 16 hours at 60°C under nitrogen. After completion of the reaction, purify the residue by silica gel column chromatography and the product **10** was obtained in 72% yield (19.3 mg).  $^1\text{H}$  NMR (400 MHz,  $\text{DMSO}-d_6$ )  $\delta$  8.22 - 7.62 (m, 4H), 6.76 (s, 2H), 3.69 (t,  $J$  = 6.4 Hz, 2H), 3.10 - 2.94 (m, 2H), 2.13 - 1.90 (m, 2H).  $^{13}\text{C}$  NMR (101 MHz,  $\text{DMSO } d_6$ )  $\delta$  168.46, 134.86, 132.14, 123.51, 52.59, 36.63, 23.60. HRMS (ESI):  $m/z$  calculated for  $[\text{C}_{11}\text{H}_{11}\text{N}_2\text{O}_4\text{S}]$   $[\text{M}-\text{H}]^-$ : 267.0445, found: 267.0449.

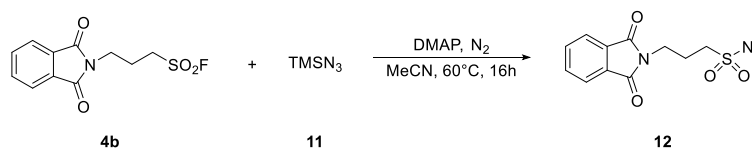

Under nitrogen atmosphere, add **4b** (27.1 mg, 0.10 mmol, 1.0 eq.), DMAP (36.7 mg, 0.3 mmol, 1.5 eq.),  $\text{TMSN}_3$  **11** (20  $\mu\text{L}$ , 0.15 mmol, 1.5 eq.), and 2 mL MeCN to a 5 mL reaction tube equipped with a magnetic stir bar. After 15 minutes of reaction, add  $\text{TMSN}_3$  (20  $\mu\text{L}$ , 0.15 mmol, 1.5 eq.) to the mixture. Repeat this addition of  $\text{TMSN}_3$  in the same amount after another 15 minutes. Continue the reaction for another 15 minutes and then add an equal amount of  $\text{TMSN}_3$  again. Let the reaction proceed at room temperature for an additional 16 hours. Upon completion, remove the solvent under reduced pressure. Purify the product by column chromatography to obtain the **12** in 80% yield (23.5 mg).  $^1\text{H}$  NMR (400 MHz,  $\text{CDCl}_3$ )  $\delta$  7.85 (dd,  $J$  = 5.3, 3.1 Hz, 2H), 7.74 (dd,  $J$  = 5.4, 3.1 Hz, 2H), 3.86 (t,  $J$  = 6.6 Hz, 2H), 3.40 (dd,  $J$  = 9.0, 6.7 Hz, 2H), 2.47 - 2.03 (m, 2H).  $^{13}\text{C}$  NMR (101 MHz,  $\text{CDCl}_3$ )  $\delta$  168.20, 134.37, 131.79, 123.56, 53.58, 35.88, 23.20. HRMS (ESI):  $m/z$  calculated for  $[\text{C}_{11}\text{H}_9\text{N}_4\text{O}_4\text{S}]$   $[\text{M}-\text{H}]^-$ : 293.0350, found: 293.0351.

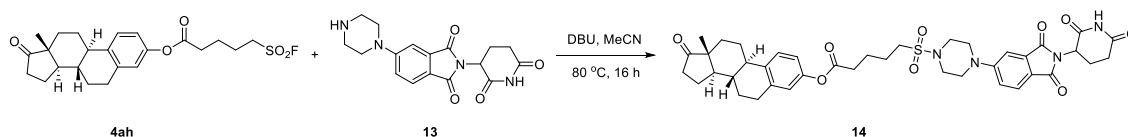

To a round-bottomed flask equipped with a magnetic stir bar, **4ah** (0.1 mmol), pomalidomide derivative **13** and DBU (0.2 mmol) and MeCN (1 mL) were added. Stir the reaction mixture for 16 hours at 80°C under nitrogen. After completion of the reaction, purify the residue by silica gel column chromatography (PE/EA = 1:1) and the product **14** was obtained in 46% yield (34.8 mg). **<sup>1</sup>H NMR (400 MHz, DMSO-*d*<sub>6</sub>)** δ 11.08 (s, 1H), 7.71 (d, *J* = 8.4 Hz, 1H), 7.40 (s, 1H), 7.29 (t, *J* = 8.9 Hz, 2H), 6.89 - 6.74 (m, 2H), 5.08 (dd, *J* = 12.9, 5.4 Hz, 1H), 3.56 (t, *J* = 4.8 Hz, 4H), 3.16 (d, *J* = 7.5 Hz, 2H), 2.88 (t, *J* = 8.6 Hz, 1H), 2.82 (d, *J* = 5.2 Hz, 2H), 2.62 (t, *J* = 6.5 Hz, 2H), 2.56 (q, *J* = 4.6 Hz, 1H), 2.47 - 2.30 (m, 2H), 2.28 - 2.14 (m, 1H), 2.05 (dd, *J* = 19.3, 9.3 Hz, 2H), 1.91 (s, 2H), 1.69 - 1.17 (m, 16H), 0.83 (s, 3H). **<sup>13</sup>C NMR (101 MHz, DMSO-*d*<sub>6</sub>)** δ 220.0, 173.3, 172.2, 170.5, 167.9, 167.4, 155.3, 148.7, 138.2, 137.6, 134.3, 126.8, 125.4, 121.9, 119.5, 119.3, 118.9, 109.0, 60.2, 50.0, 49.3, 47.9, 47.5, 45.2, 44.0, 37.9, 35.8, 33.3, 31.8, 31.5, 29.3, 26.3, 25.8, 23.6, 22.5, 21.6, 21.2, 13.9. **HRMS (ESI):** *m/z* calculated for [C<sub>40</sub>H<sub>45</sub>N<sub>4</sub>O<sub>9</sub>S] [M-H]<sup>-</sup>: 757.2913, found: 757.2919.

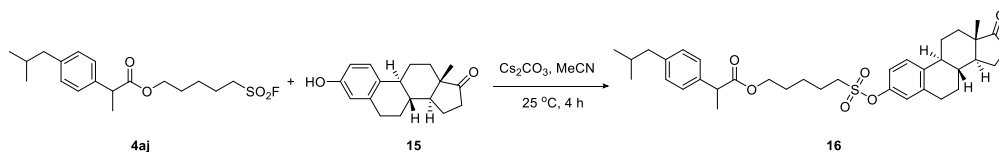

To a 10 mL round-bottomed flask equipped with a magnetic stir bar, **4aj** (0.1 mmol), estrone **15** (0.15 mmol) and Cs<sub>2</sub>CO<sub>3</sub> (0.15 mmol) in MeCN (2 mL) were added. Stir the reaction mixture for 4 hours at 25°C under nitrogen. After completion of the reaction, purify the residue by silica gel column chromatography (PE/EA = 2:1) and product **16** was obtained in 85% yield (51.8 mg). **<sup>1</sup>H NMR (400 MHz, Chloroform-*d*)** δ 7.30 (d, *J* = 8.4 Hz, 1H), 7.19 (d, *J* = 7.7 Hz, 2H), 7.08 (d, *J* = 7.7 Hz, 2H), 7.01 (d, *J* = 11.0 Hz, 2H), 4.06 (dd, *J* = 12.9, 6.2 Hz, 2H), 3.68 (q, *J* = 7.2 Hz, 1H), 3.15 (t, *J* = 7.9 Hz, 2H), 2.93 (dd, *J* = 9.2, 4.2 Hz, 2H), 2.51 (dd, *J* = 18.8, 8.7 Hz, 1H), 2.44 (d, *J* = 7.3 Hz, 2H), 1.97 - 1.79 (m, 4H), 1.69 - 1.36 (m, 14H), 1.27 (s, 1H), 1.25 (d, *J* = 7.4 Hz, 3H), 0.91 (s, 3H), 0.89 (s, 3H), 0.88 (s, 3H). **<sup>13</sup>C NMR (101 MHz, Chloroform-*d*)** δ 219.5, 173.7, 145.9, 139.5, 137.9, 137.8, 136.8, 128.3, 126.1, 125.9, 121.0, 118.0, 62.9, 49.4, 49.1, 46.9, 44.1, 44.0, 43.1, 36.9, 34.8, 30.5, 29.1, 28.4, 27.0, 25.2, 24.7, 23.5, 22.1, 21.4, 20.6, 17.3, 12.8. **HRMS (ESI):** *m/z* calculated for [C<sub>36</sub>H<sub>49</sub>O<sub>6</sub>S]<sup>+</sup>[M+H]<sup>+</sup>: 609.3244, found: 609.3247.

### 3. Mechanism studies

#### 3.1 Radical trapping experiments with TEMPO

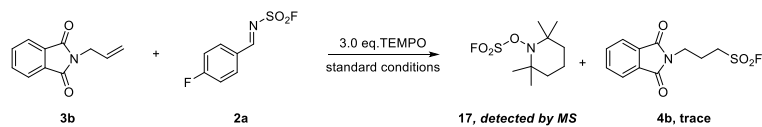

**3b** (0.1 mmol), **2a** (0.3 mmol), [Ir[dF(CF<sub>3</sub>)ppy]<sub>2</sub>(dtbbpy)]PF<sub>6</sub> (1 mmol%), Na<sub>2</sub>CO<sub>3</sub> (0.1 mmol), TEMPO (0.3 mmol) and 1,3-dioxane (3 mL) were added to a 10 mL Schlenk tube equipped with a magnetic stirring bar. The tube was evacuated and backfilled with nitrogen. The reaction mixture was then irradiated with 30 W blue LEDs for 12 h. TLC and LC-MS analysis demonstrated that **17** is found. **MS (ESI)**: m/z calculated for [C<sub>9</sub>H<sub>19</sub>FNO<sub>3</sub>S<sup>+</sup>] [M+H<sup>+</sup>]: 240.11, found: 240.95.

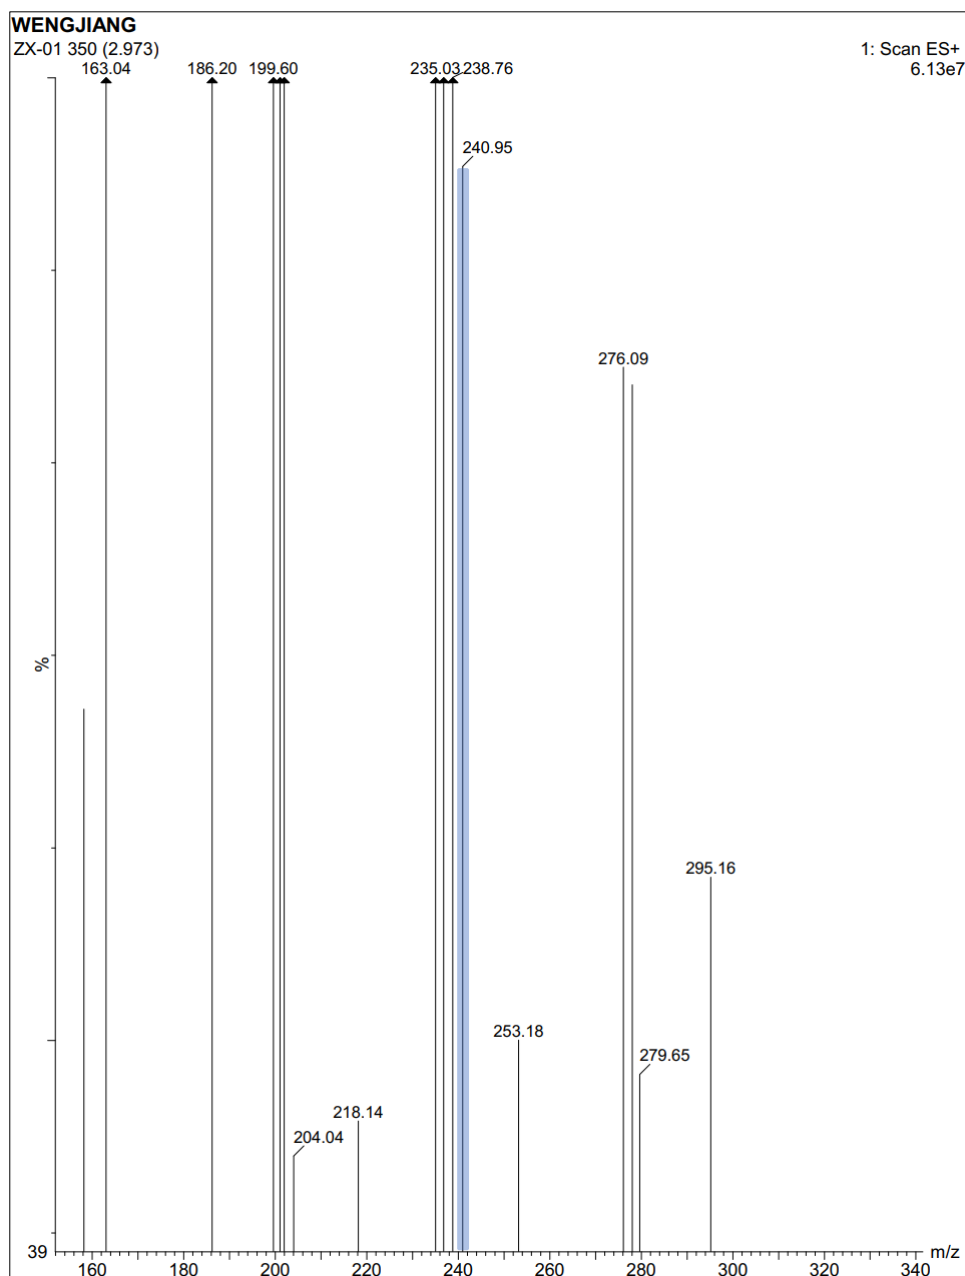

### 3.2 Radical trapping experiments with 1,1-diphenylethylene

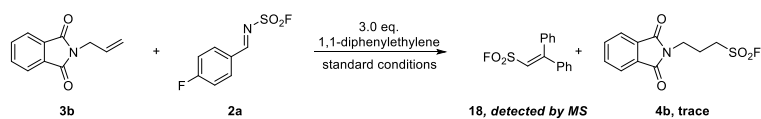

**3b** (0.1 mmol), **2a** (0.3 mmol),  $[\text{Ir}(\text{dF}(\text{CF}_3)\text{ppy})_2(\text{dtbbpy})]\text{PF}_6$  (1 mmol%),  $\text{Na}_2\text{CO}_3$  (0.1 mmol), 1,1-diphenylethylene (0.3 mmol) and 1,3-dioxane (3 mL) were added to a 10 mL Schlenk tube equipped with a magnetic stirring bar. The tube was evacuated and backfilled with nitrogen. The reaction mixture was then irradiated with 30 W blue LEDs for 12 h. TLC and LC-MS analysis demonstrated that **18** is found. **MS (ESI):**  $m/z$  calculated for  $[\text{C}_{14}\text{H}_{12}\text{FO}_2\text{S}^+]$   $[\text{M}+\text{H}^+]$ : 263.05, found: 263.16.

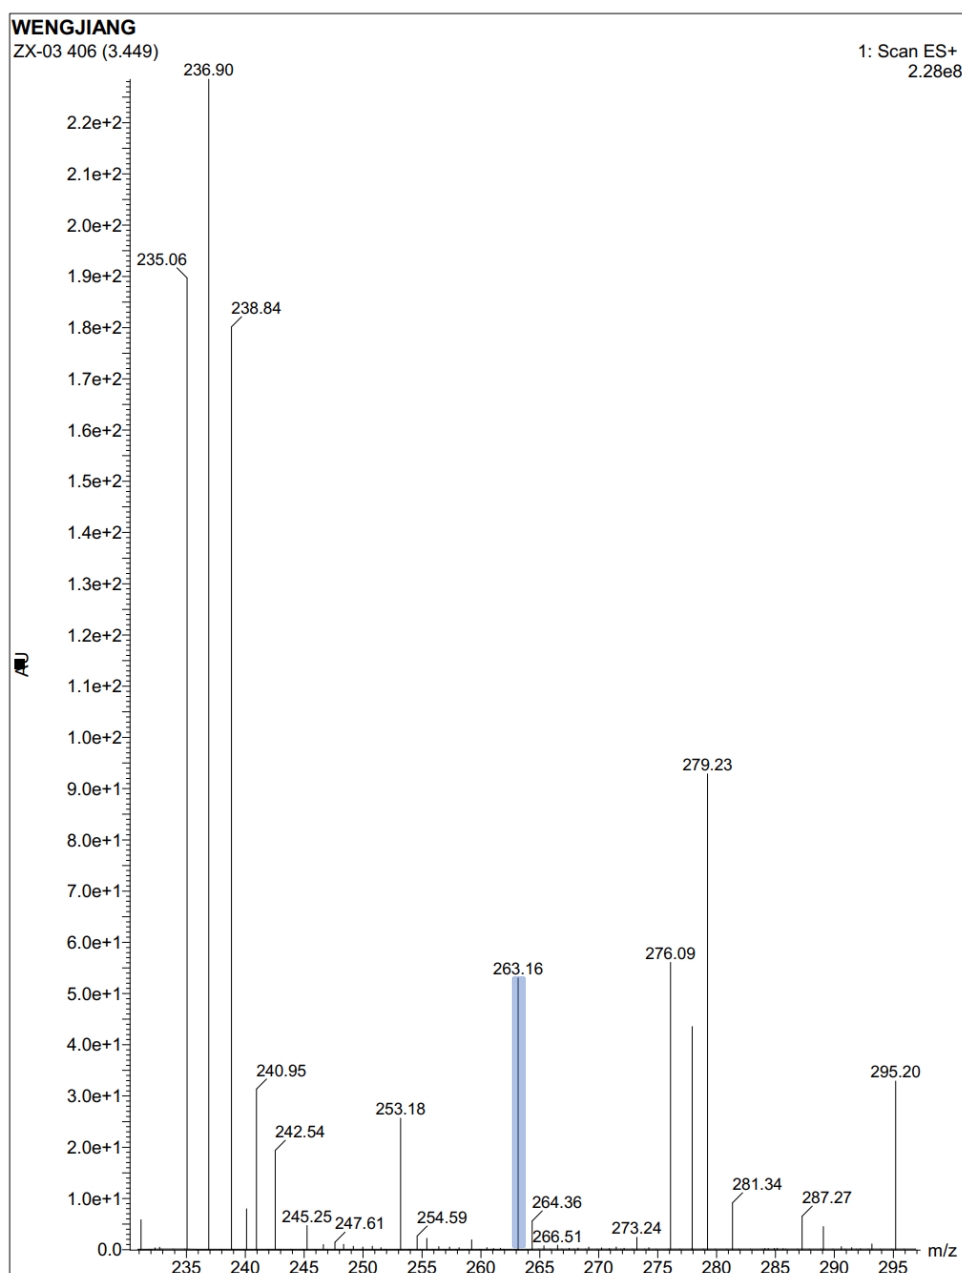



### 3.3 Iminyl radical trapping experiment

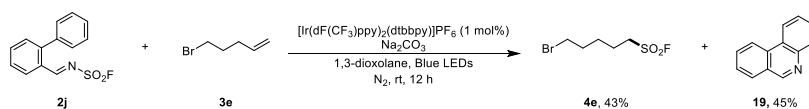

**3e** (0.1 mmol), **2j** (0.3 mmol),  $[\text{Ir}(\text{dF}(\text{CF}_3)\text{ppy})_2(\text{dtbbpy})]\text{PF}_6$  (1 mmol%),  $\text{Na}_2\text{CO}_3$  (0.1 mmol) and 1,3-dioxane (3 mL) were added to a 10 mL Schlenk tube equipped with a magnetic stirring bar. The flask was backfilled with nitrogen. The reaction mixture was then irradiated with 30 W blue LEDs for 12 h. After the reaction, the solution was purified by flash column chromatography or on silica gel to give the product **4e** in 43% yield and **19**<sup>[8]</sup> in 45% yield. Compound **19**: **<sup>1</sup>H NMR (400 MHz, Chloroform-*d*)**  $\delta$  9.30 (s, 1H), 8.65 – 8.56 (m, 2H), 8.20 (dd,  $J = 8.1, 1.4$  Hz, 1H), 8.06 (dd,  $J = 8.0, 1.4$  Hz, 1H), 7.91 – 7.84 (m, 1H), 7.80 – 7.66 (m, 3H). **<sup>13</sup>C NMR (101 MHz, Chloroform-*d*)**  $\delta$  153.60, 144.49, 132.59, 131.04, 130.17, 128.80, 128.72, 127.52, 127.12, 126.42, 124.13, 122.24, 121.90. **HRMS (ESI):**  $m/z$  calculated for  $[\text{C}_{13}\text{H}_{10}\text{N}^+][\text{M}+\text{H}^+]$ : 180.0808, found: 180.0813.

### 3.4 Stern-Volmer quenching studies

Stern-Volmer luminescence quenching studies were performed using a Jasco FP-8300 spectrofluorometer using Starna® fluorescence quartz cuvettes (type: 29-F, chamber volume = 1.400 mL,  $H \times W \times D = 48 \text{ mm} \times 12.5 \text{ mm} \times 12.5 \text{ mm}$ , path length = 10 mm). The following parameters were set: data interval = 0.5 nm, scan-speed = 500 nm/min, excitation wavelength  $\lambda_{\text{ex}} = 405 \text{ nm}$ , measured luminescence wavelength  $\lambda = 471 \text{ nm}$ . All samples used in the luminescence quenching-based screening studies were prepared in an argon-filled glovebox with degassed and dry MeCN. Stock solutions of potential quenchers and the photocatalyst  $[\text{Ir}(\text{dF}(\text{CF}_3)\text{ppy})_2(\text{dtbbpy})]\text{PF}_6$  ( $5 \times 10^{-5} \text{ M}$ ) were initially prepared. Stern-Volmer luminescence quenching studies were performed using a stock solution of the photocatalyst and variable concentrations of the potential quenchers at rt under an argon atmosphere. The samples were prepared by dilution in the 1.4 mL quartz cuvettes inside the argon-filled glovebox. The solutions were irradiated at 405 nm and the luminescence was measured at 471 nm. The ratio of  $I_0/I$  was plotted as a function of the quencher concentration [Quencher] ( $I_0$  = emission intensity of the photocatalyst in isolation at the specified wavelength 471 nm;  $I$  = observed emission intensity of the photocatalyst with added quencher).

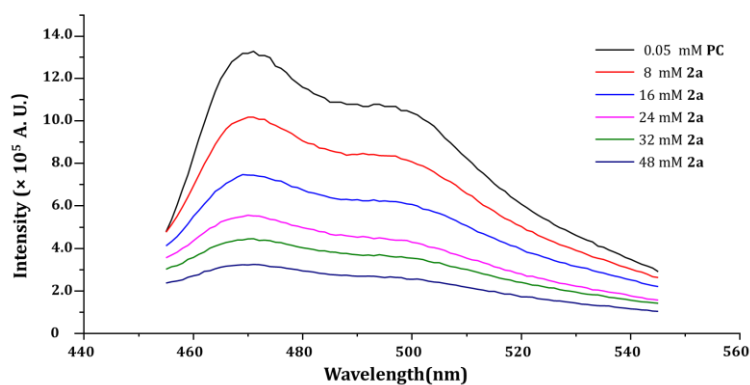

**Figure S1.** Emission spectra of  $[\text{Ir}(\text{dF}(\text{CF}_3)\text{ppy})_2(\text{dtbbpy})]\text{PF}_6$  ( $5 \times 10^{-5} \text{ M}$ ) at different concentrations of **2a**

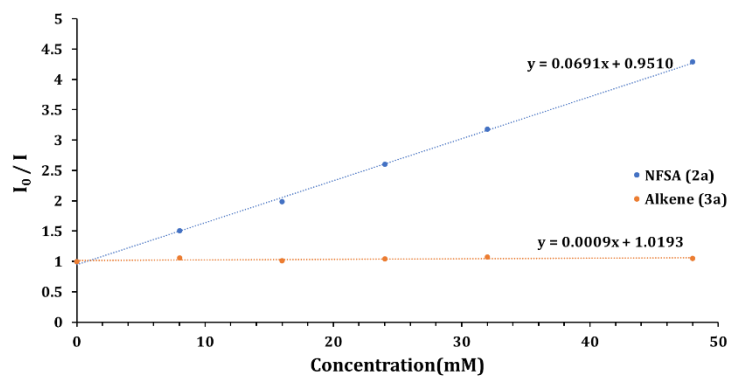

**Figure S2.** Stern-Volmer plot of  $(\text{Ir}[\text{dF}(\text{CF}_3)\text{ppy}]_2(\text{dtbbpy}))\text{PF}_6$  ( $5 \times 10^{-5}$  M) at different concentrations of **2a** and **3a**

## 4. Green metrics<sup>[9]</sup>

To give a clear calculation, compound **4g** has been chosen as a representative example.

| entry    | Work of different groups | <i>E</i> -Factor | AE           | RME          | PMI         |
|----------|--------------------------|------------------|--------------|--------------|-------------|
| <b>1</b> | <b>This work</b>         | <b>4.35</b>      | <b>58.4%</b> | <b>21.2%</b> | <b>5.35</b> |
| 2        | Wang <sup>[9]</sup>      | 6.24             | 35.2%        | 14.0%        | 7.24        |
| 3        | Liao <sup>[10]</sup>     | 6.94             | 35.2%        | 12.6%        | 7.94        |
| 4        | Glorius <sup>[11]</sup>  | 4.48             | 39.3%        | 18.5%        | 5.47        |
| 5        | Weng <sup>[6]</sup>      | 4.82             | 50.5%        | 17.4%        | 5.82        |

### Our method

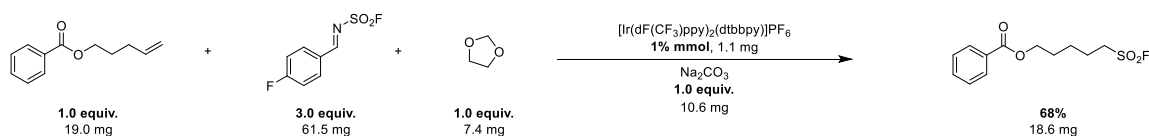

Total amounts of reactants = 99.6 mg

Amount of final product = 18.6 mg

Amount of waste: 99.6 mg – 18.6 mg = 81.0 mg

***E*-Factor** = Amount of waste/Amount of final product = 4.35

Molecular weight of product = 274.1

Sum of molecular weight of reagent = 469.1

**AE** = Molecular weight of product/Sum of molecular weight of reagent = 58.4%

Mass of product = 18.6 mg

Total mass of reagent = 87.9 mg

**RME** = Mass of product/Total mass of reagent = 21.2%

Total mass in process = 99.6 mg

Mass of product = 18.6 mg

**PMI** = Total mass in process/Mass of product = 5.35

## Wang's work<sup>[10]</sup>

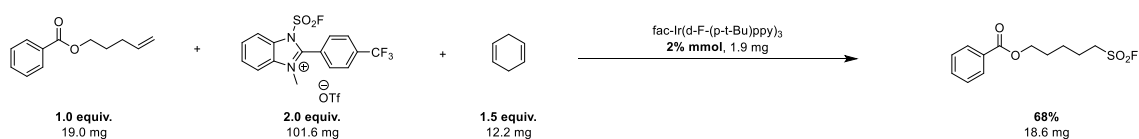

Total amounts of reactants = 134.7 mg

Amount of final product = 18.6 mg

Amount of waste: 134.7 mg – 18.6 mg = 116.1 mg

**E-Factor** = Amount of waste/Amount of final product = 6.24

Molecular weight of product = 274.1

Sum of molecular weight of reagent = 778.2

**AE** = Molecular weight of product/Sum of molecular weight of reagent = 35.2%

Mass of product = 18.6 mg

Total mass of reagent = 132.8 mg

**RME** = Mass of product/Total mass of reagent = 14.0 %

Total mass in process = 134.7 mg

Mass of product = 18.6 mg

**PMI** = Total mass in process/Mass of product = 7.24

## Liao's work<sup>[11]</sup>

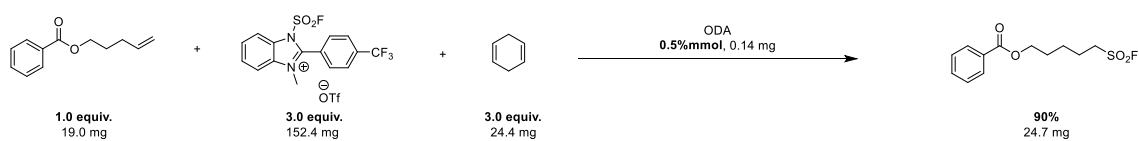

Total amounts of reactants = 195.9 mg

Amount of final product = 24.7 mg

Amount of waste: 195.9 mg – 24.7 mg = 171.2 mg

**E-Factor** = Amount of waste/Amount of final product = 6.94

Molecular weight of product = 274.1

Sum of molecular weight of reagent = 778.2

**AE** = Molecular weight of product/Sum of molecular weight of reagent = 35.2%

Mass of product = 24.7 mg

Total mass of reagent = 195.8 mg

**RME** = Mass of product/Total mass of reagent = 12.6 %

Total mass in process = 195.9 mg

Mass of product = 24.7 mg

**PMI** = Total mass in process/Mass of product = 7.94

## Glorius's work<sup>[12]</sup>

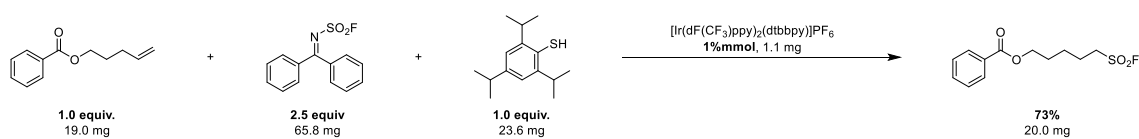

Total amounts of reactants = 109.5 mg

Amount of final product = 20.0 mg

Amount of waste: 109.5 mg – 20.0 mg = 89.5 mg

**E-Factor** = Amount of waste/Amount of final product = 4.48

Molecular weight of product = 274.1

Sum of molecular weight of reagent = 689.6

**AE** = Molecular weight of product/Sum of molecular weight of reagent = 39.3%

Mass of product = 20.0 mg

Total mass of reagent = 108.4 mg

**RME** = Mass of product/Total mass of reagent = 18.5 %

Total mass in process = 109.5 mg

Mass of product = 20.0 mg

**PMI** = Total mass in process/Mass of product = 5.47

## Weng's work<sup>[6]</sup>

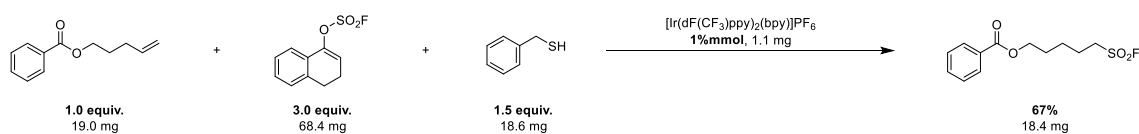

Total amounts of reactants = 107.1 mg

Amount of final product = 18.4 mg

Amount of waste: 107.1 mg – 18.4 mg = 88.7 mg

**E-Factor** = Amount of waste/Amount of final product = 4.82

Molecular weight of product = 274.1

Sum of molecular weight of reagent = 542.3

**AE** = Molecular weight of product/Sum of molecular weight of reagent = 50.5%

Mass of product = 18.4 mg

Total mass of reagent = 106.0 mg

**RME** = Mass of product/Total mass of reagent = 17.4 %

Total mass in process = 107.1 mg

Mass of product = 18.4 mg

**PMI** = Total mass in process/Mass of product = 5.82

## 5. Reference

- [1] N. F. Nikitas, E. Voutyritsa, P. L. Gkizis, C. G. Kokotos, *Eur. J. Org. Chem.*, **2021**, 2021, 96-101.
- [2] F. Wang, P. Xu, F. Cong, P. Tang, *Chem. Sci.*, **2018**, 9, 8836-8841.
- [3] J. R. Tabor, D. C. Obenschain, F. E. Michael, *Chem. Sci.*, **2020**, 11, 1677-1682.
- [4] A. A. Thomas, *J. Am. Chem. Soc.*, **2018**, 140, 13976-13984.
- [5] K. Clauß, H.-J. Friedrich and H. Jensen, *Justus Liebigs Ann. Chem.* **1974**, 561–592.
- [6] T. Xiong, Q.-L. Chen, Z.-D. Chen, J.-T. Yi, S.-C. Wang, G. Lu, A.S.C. Chan, J. Weng, *Chem Catal.*, **2023**, 3, 100821.
- [7] T. Xu, T. Cao, M. Yang, R. Xu, X. Nie, S. Liao, *Org. Lett.* **2020**, 2, 3692–3696.
- [8] C. Tang, Y. Yuan, N. Jiao, *Org. Lett.*, **2015**, 17, 2206-2209.
- [9] (a) K. V. Aken, L. Strekowski, L. Patiny, Beilstein *J. Org. Chem.*, **2006**, 2, 3; (b) R. A. Sheldon, *Green Chem.*, **2007**, 9, 1273-1283; (c) R. A. Sheldon, *Chem. Commun.*, **2008**, 44, 3352-3356; (d) C. Jimenez-Gonzalez, C. S. Ponder, Q. B. Broxterman, J. B. Manley, *Org. Process Res. Dev.*, **2011**, 15, 912-917.
- [10] W. Zhang, H. Li, X. Li, Z. Zou, M. Huang, J. Liu, X. Wang, S. Ni, Y. Pan, Y. Wang, *Nat. Commun.*, 2022, **13**, 3515.
- [11] P. Wang, H. Zhang, M. Zhao, S. Ji, L. Lin, N. Yang, X. Nie, J. Song, S. Liao, *Angew. Chem., Int. Ed.*, 2022, **61**, e202207684.
- [12] J. E. Erchinger, R. Hoogesteger, R. Laskar, S. Dutta, C. Hümpel, D. Rana, C. G. Daniliuc, F. Glorius, *J. Am. Chem. Soc.*, 2023, **145**, 2364–2374.



## 6. $^1\text{H}$ NMR, $^{13}\text{C}$ NMR, $^{19}\text{F}$ NMR and $^{31}\text{P}$ NMR spectra for compounds

(*E*)-(4-fluorobenzylidene)sulfamoyl fluoride (**2a**)

$^1\text{H}$  NMR

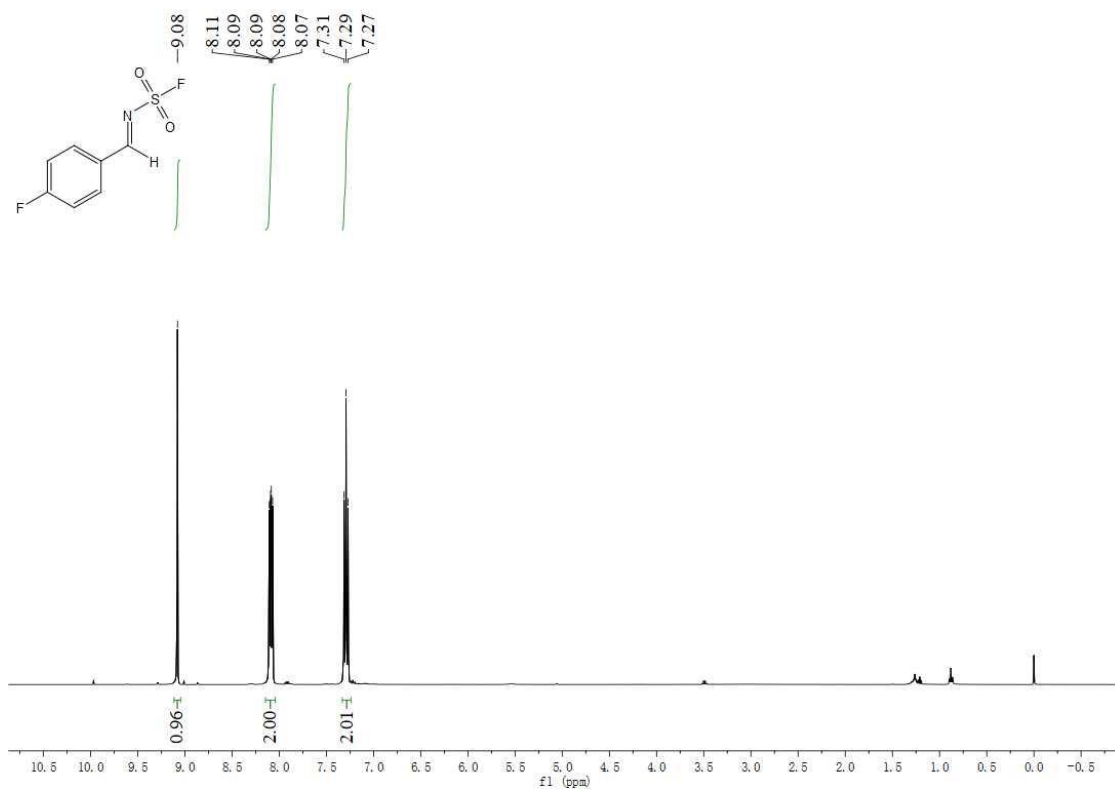

$^{13}\text{C}$  NMR

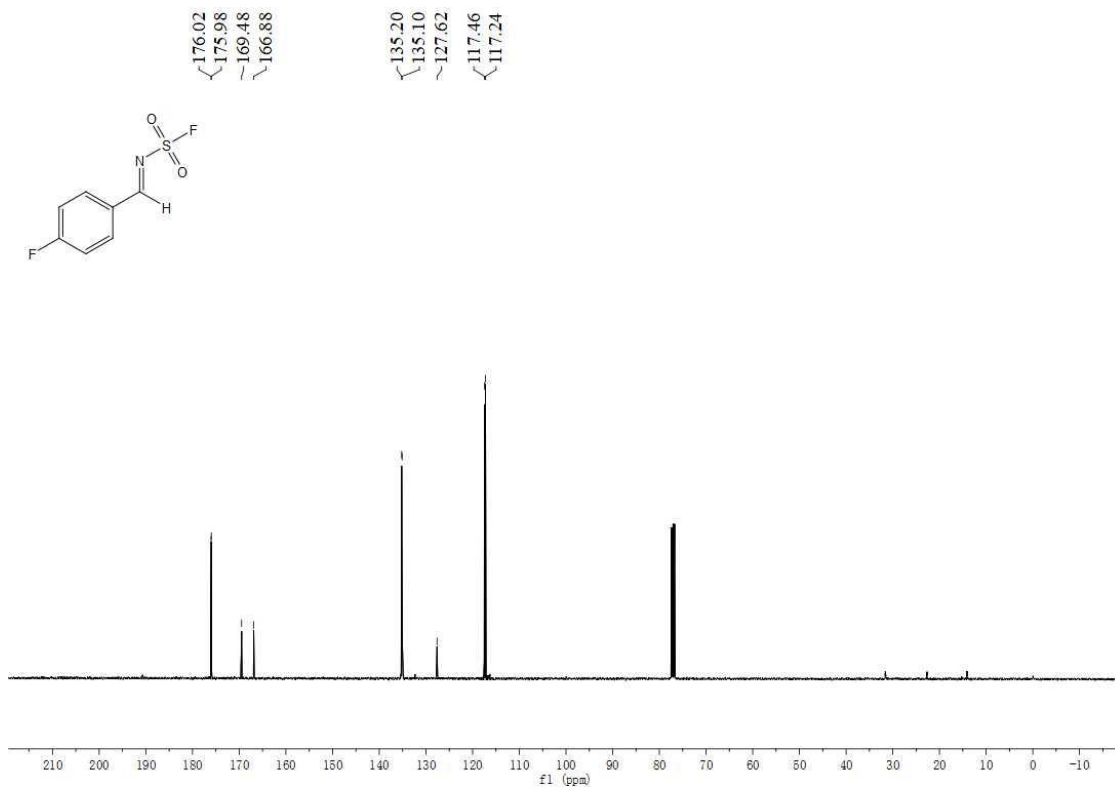

# <sup>19</sup>F NMR

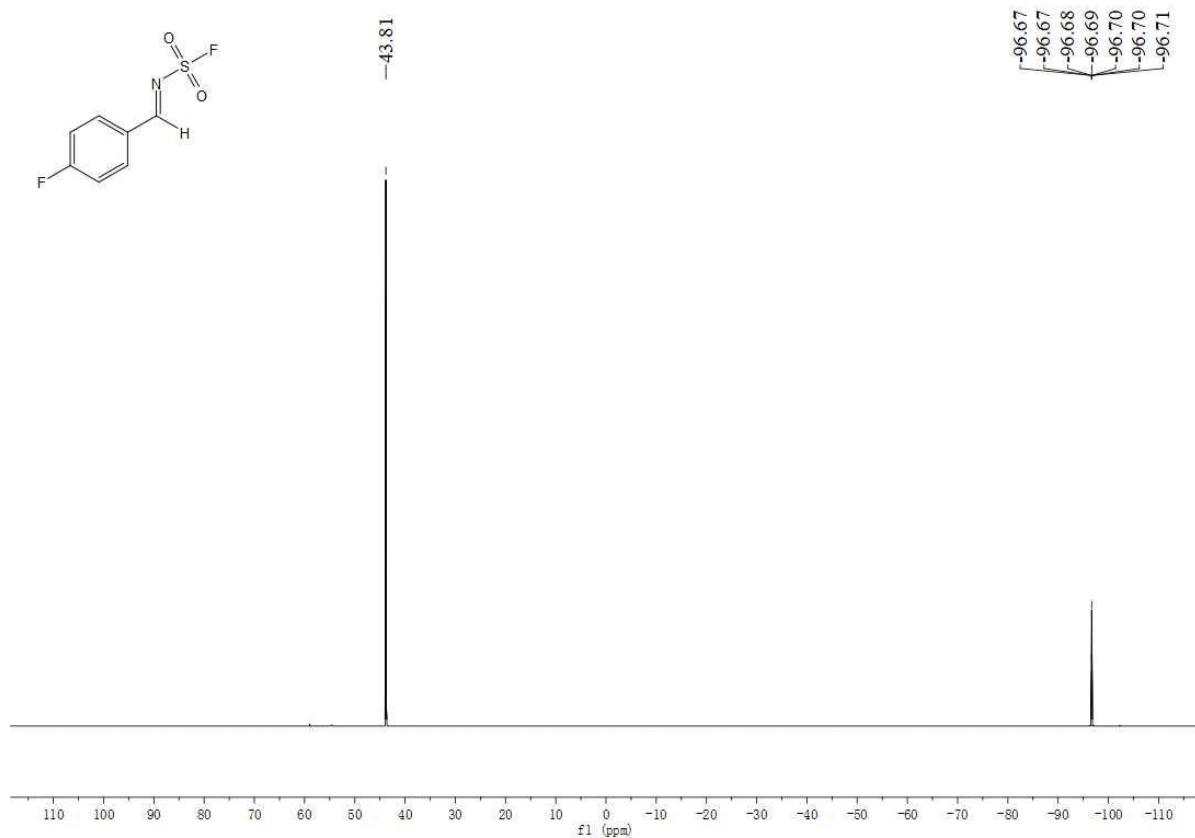

# (E)-4-(4-bromobenzylidene)sulfamoyl fluoride (2b)

## <sup>1</sup>H NMR

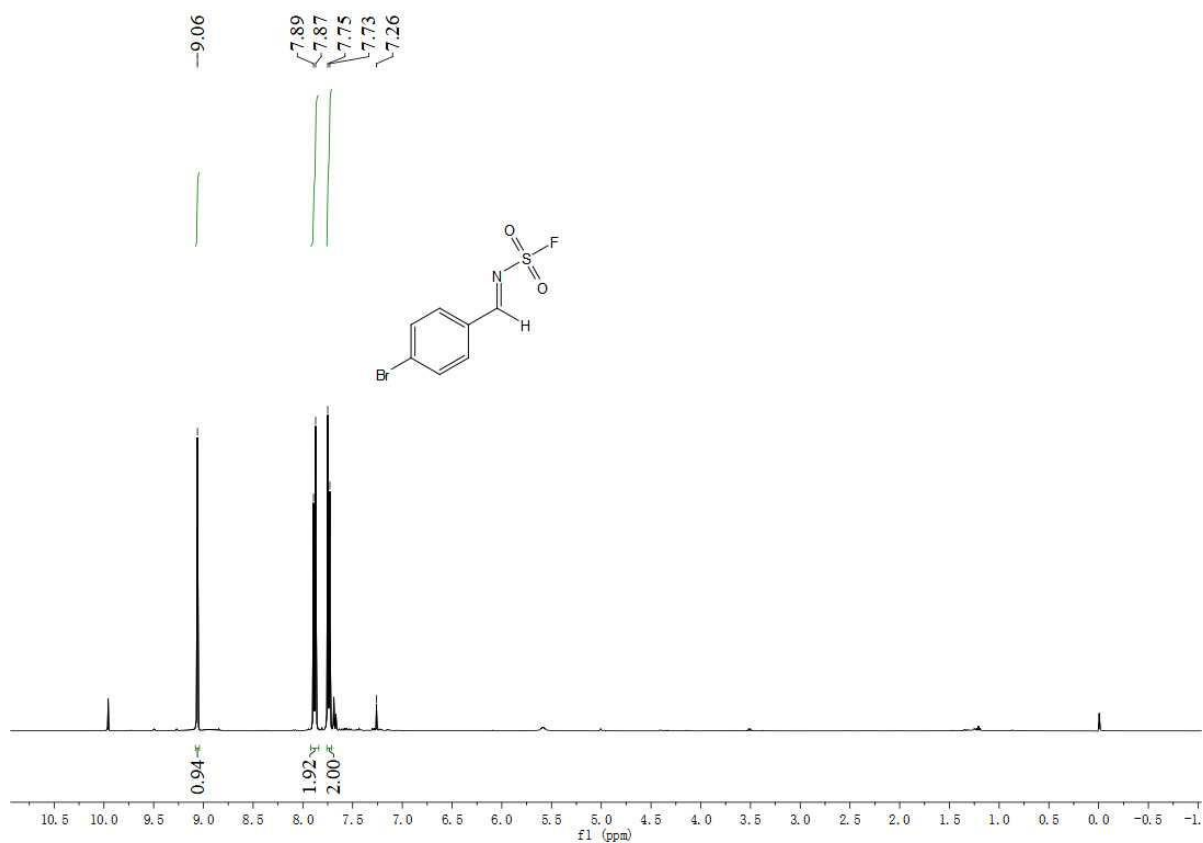

# <sup>13</sup>C NMR

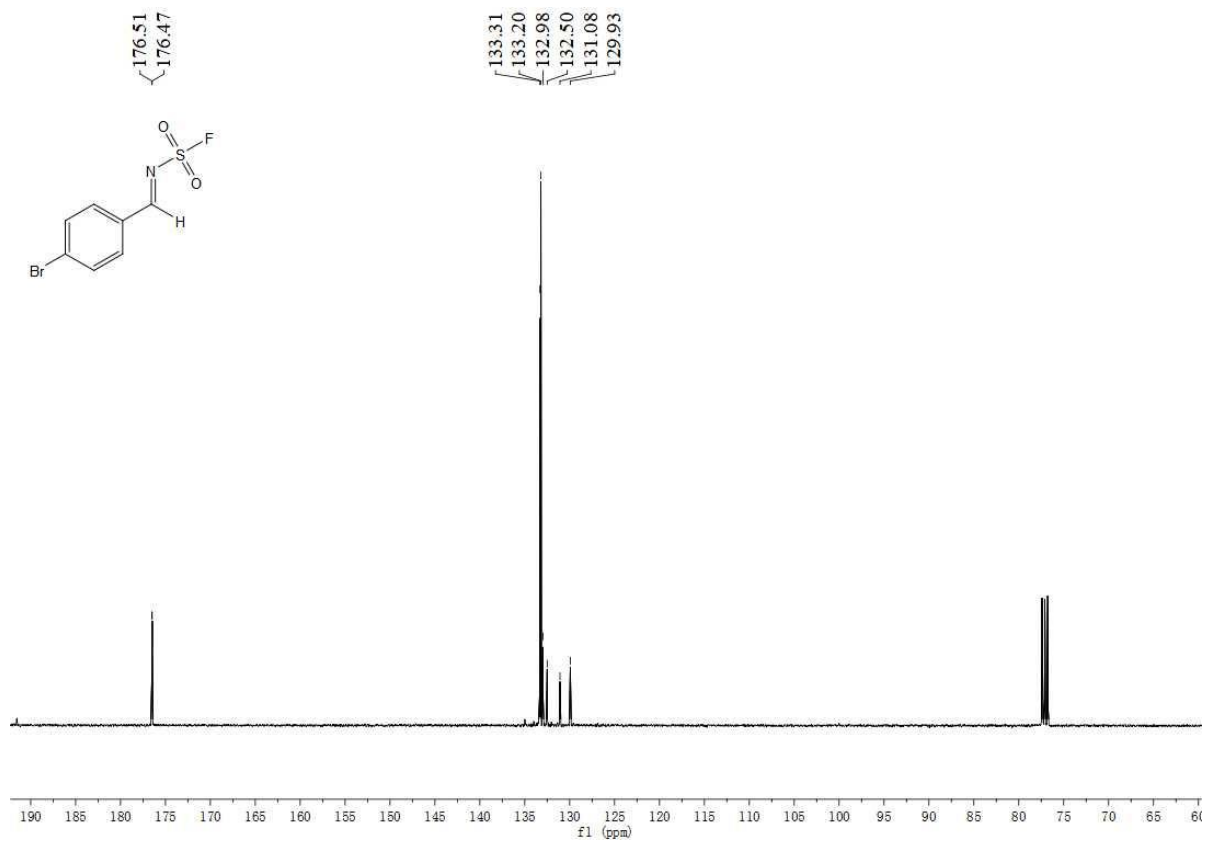

# <sup>19</sup>F NMR

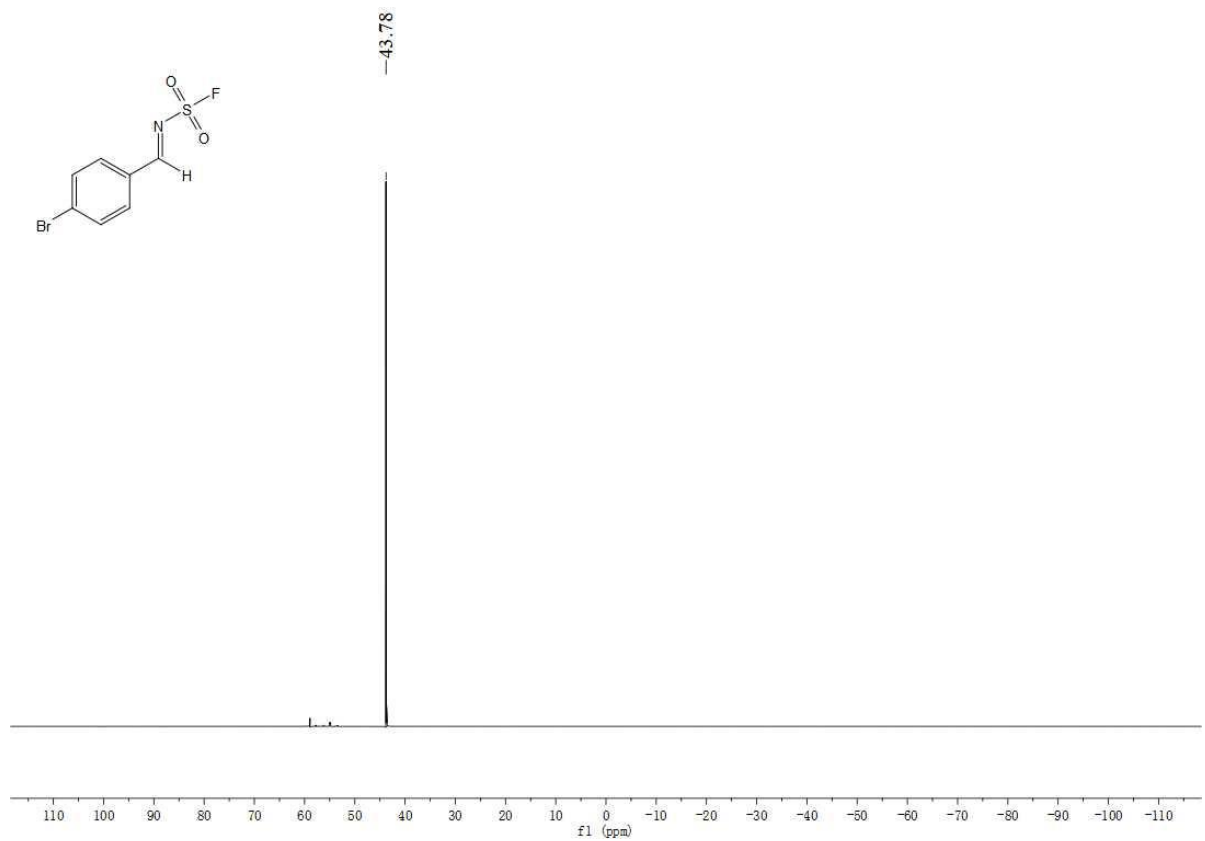

*methyl (E)-4-(((fluorosulfonyl)imino)methyl)benzoate (2c)*

<sup>1</sup>H NMR

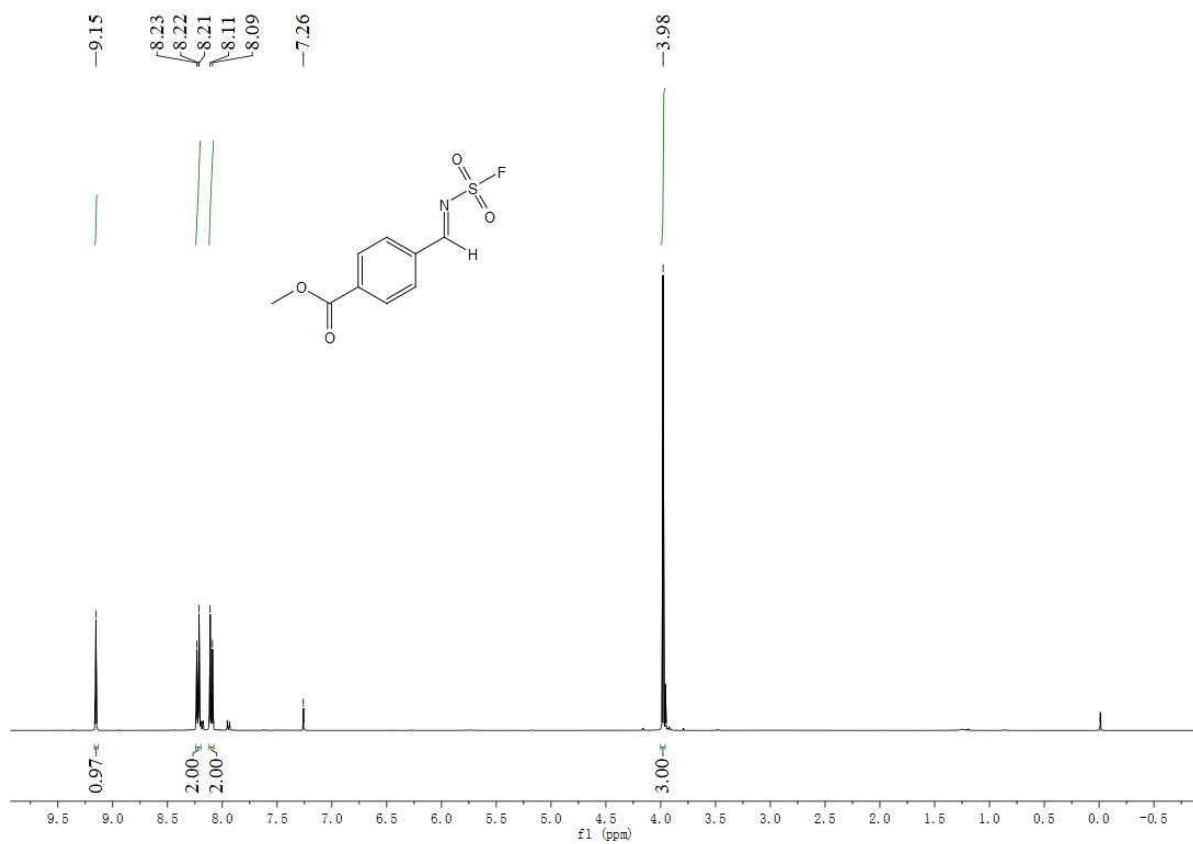

<sup>13</sup>C NMR

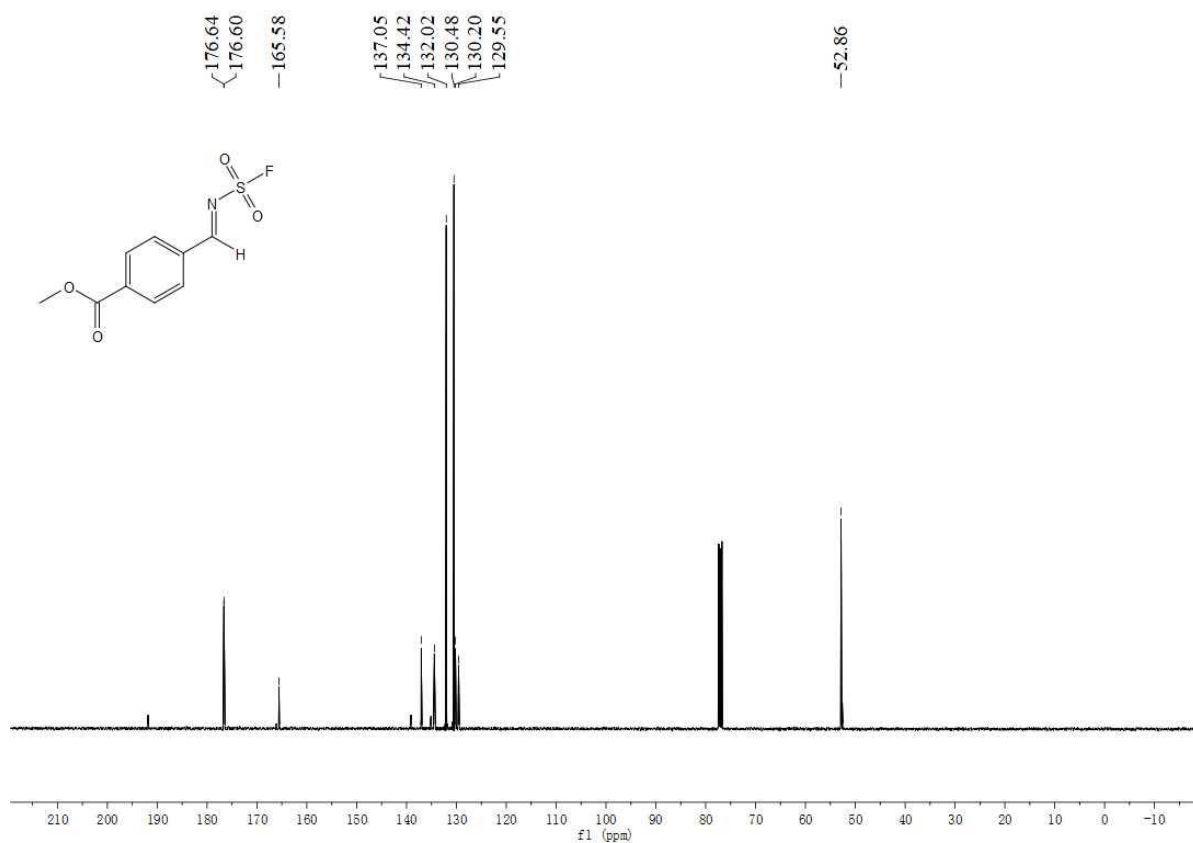

# <sup>19</sup>F NMR

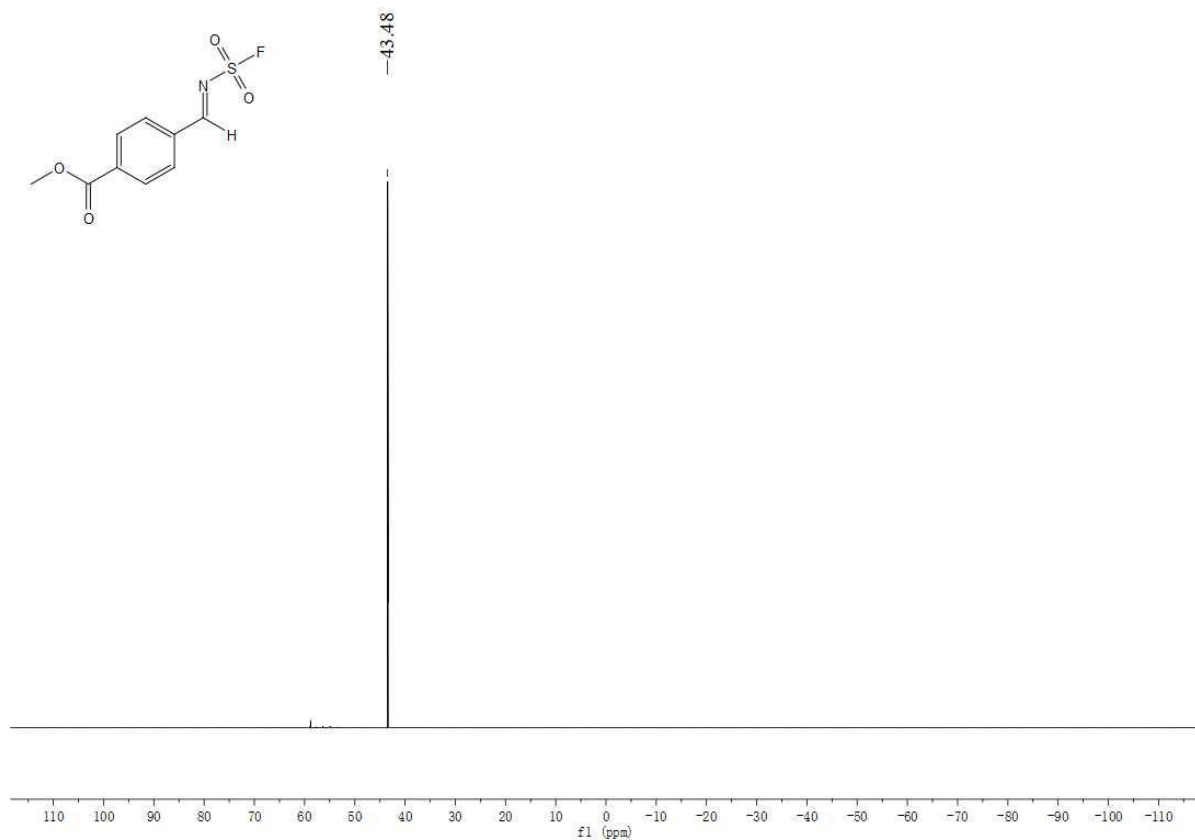

# (E)-4-(4-nitrobenzylidene)sulfamoyl fluoride (2d)

## <sup>1</sup>H NMR

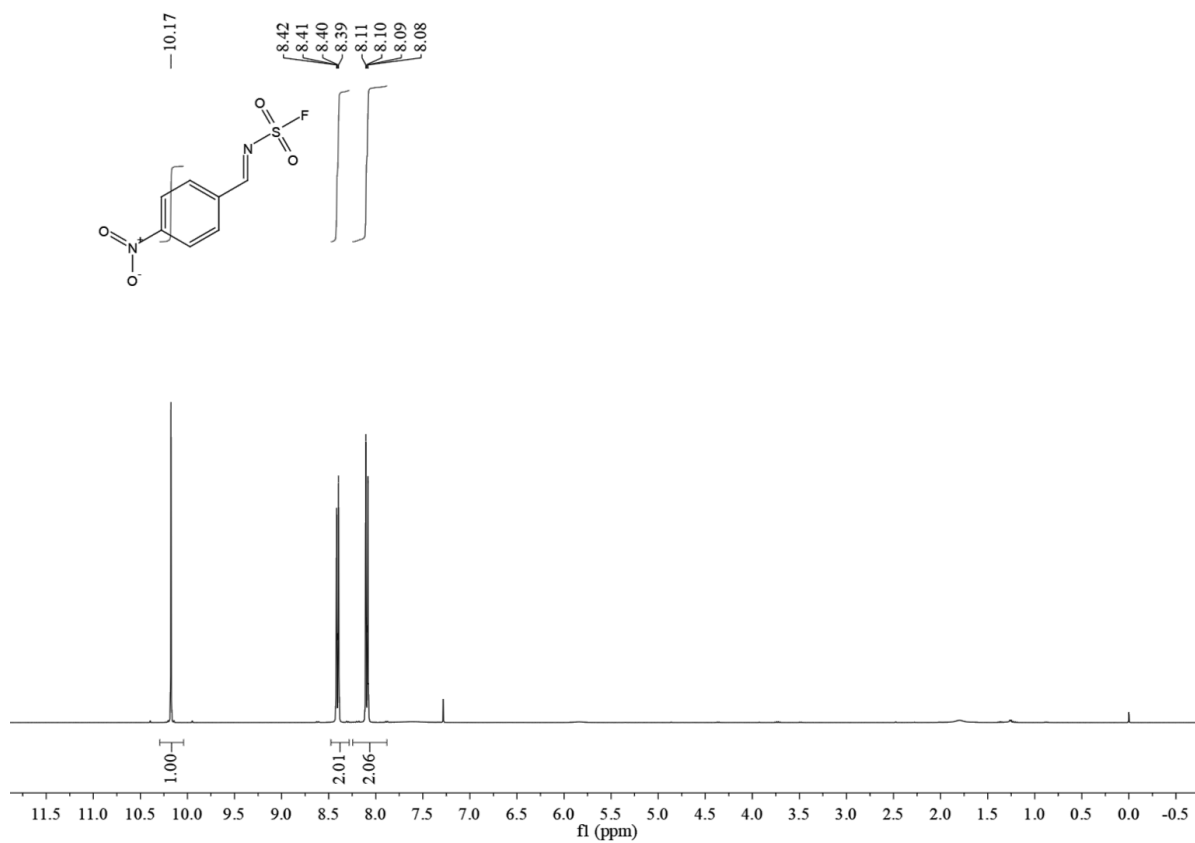

# <sup>13</sup>C NMR

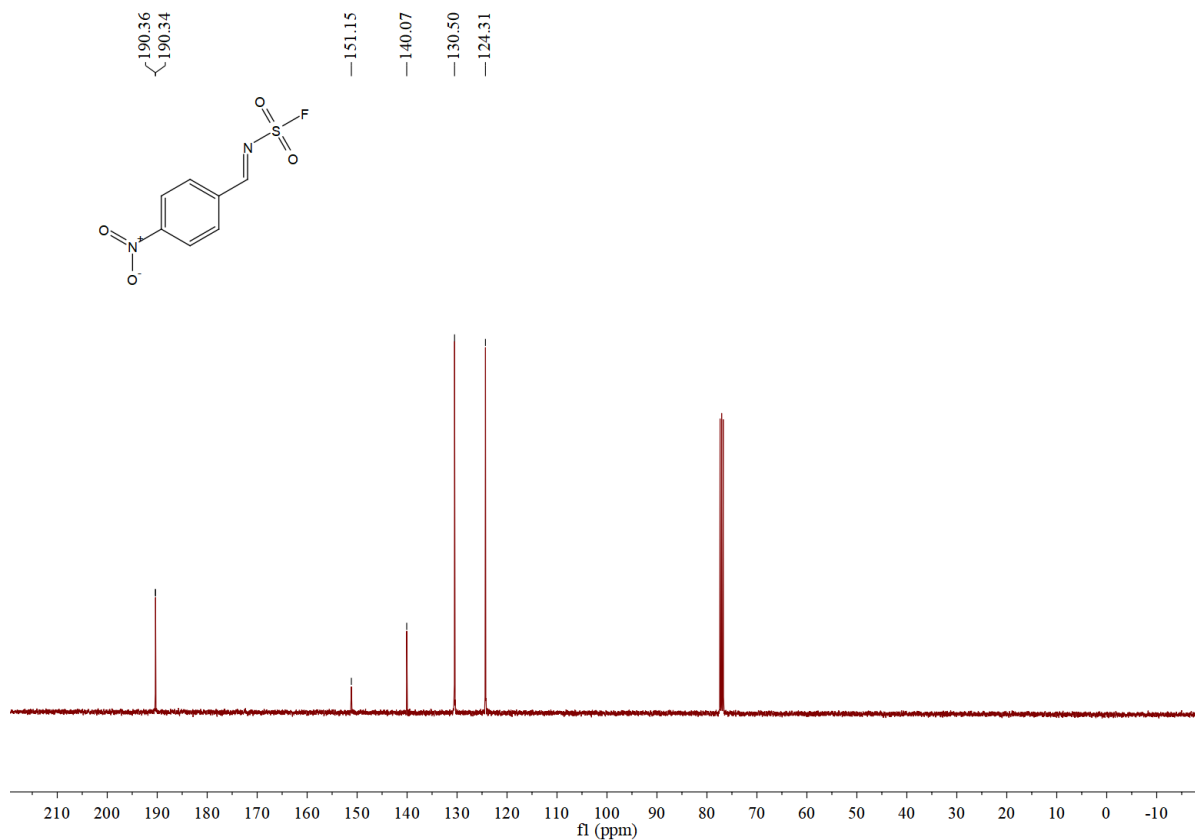

# <sup>19</sup>F NMR

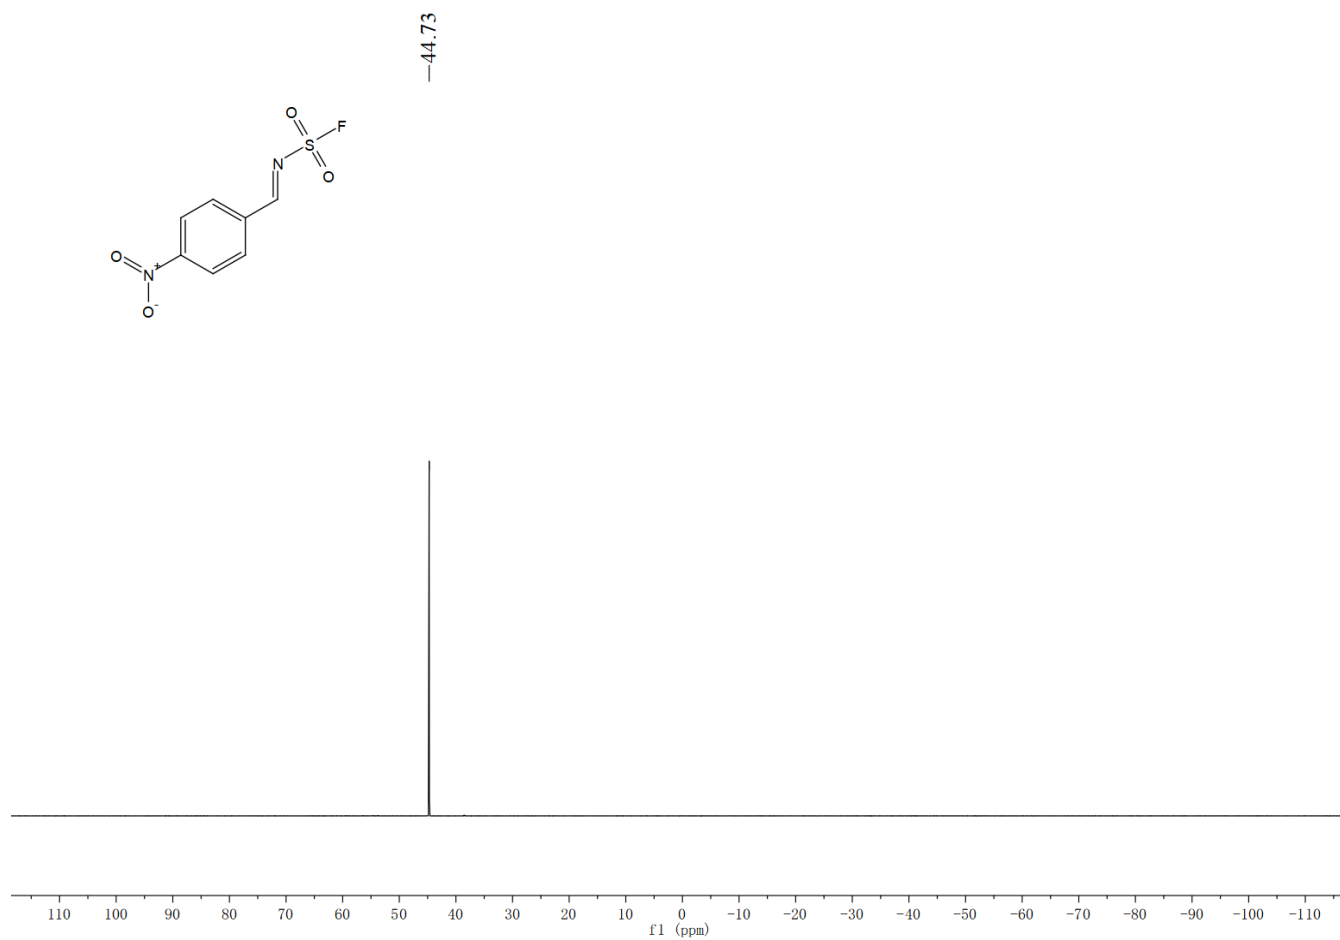

(E)-(4-methylbenzylidene)sulfamoyl fluoride (2e)

<sup>1</sup>H NMR

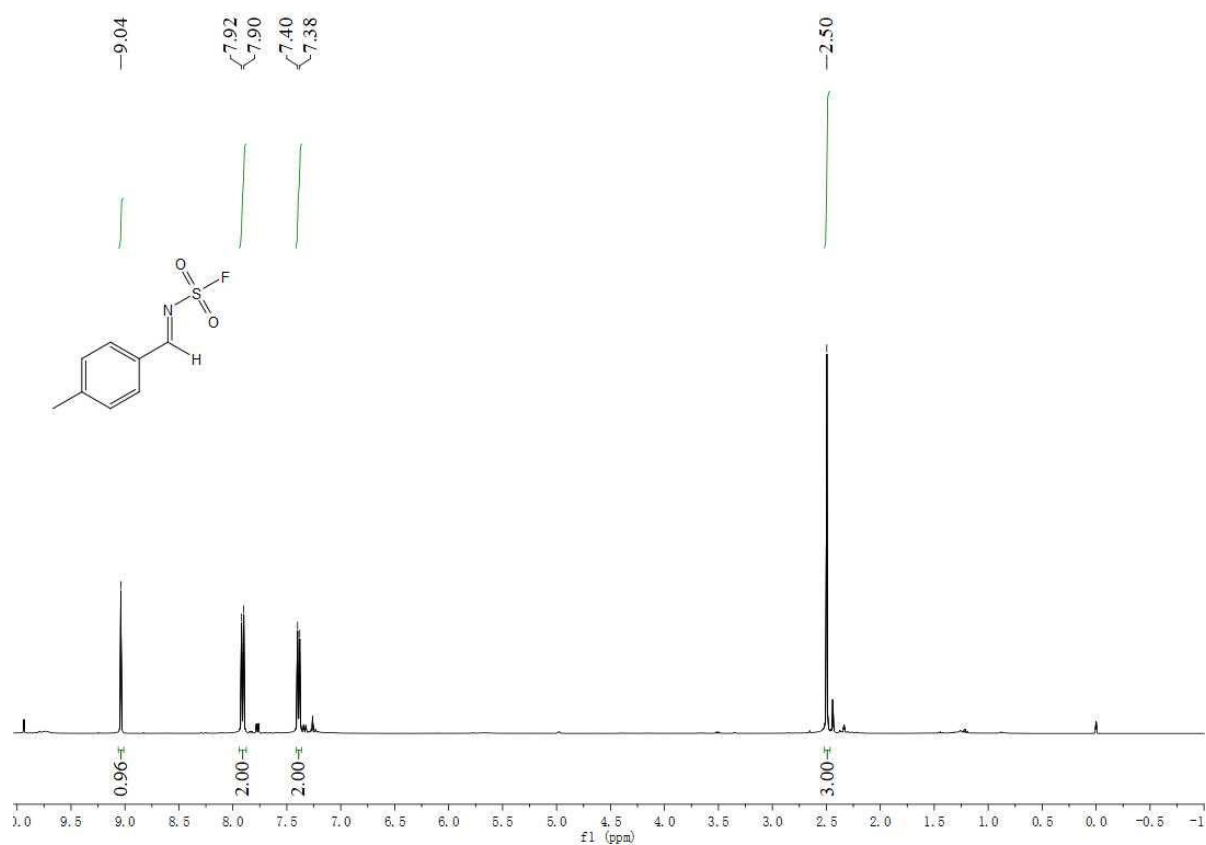

<sup>13</sup>C NMR

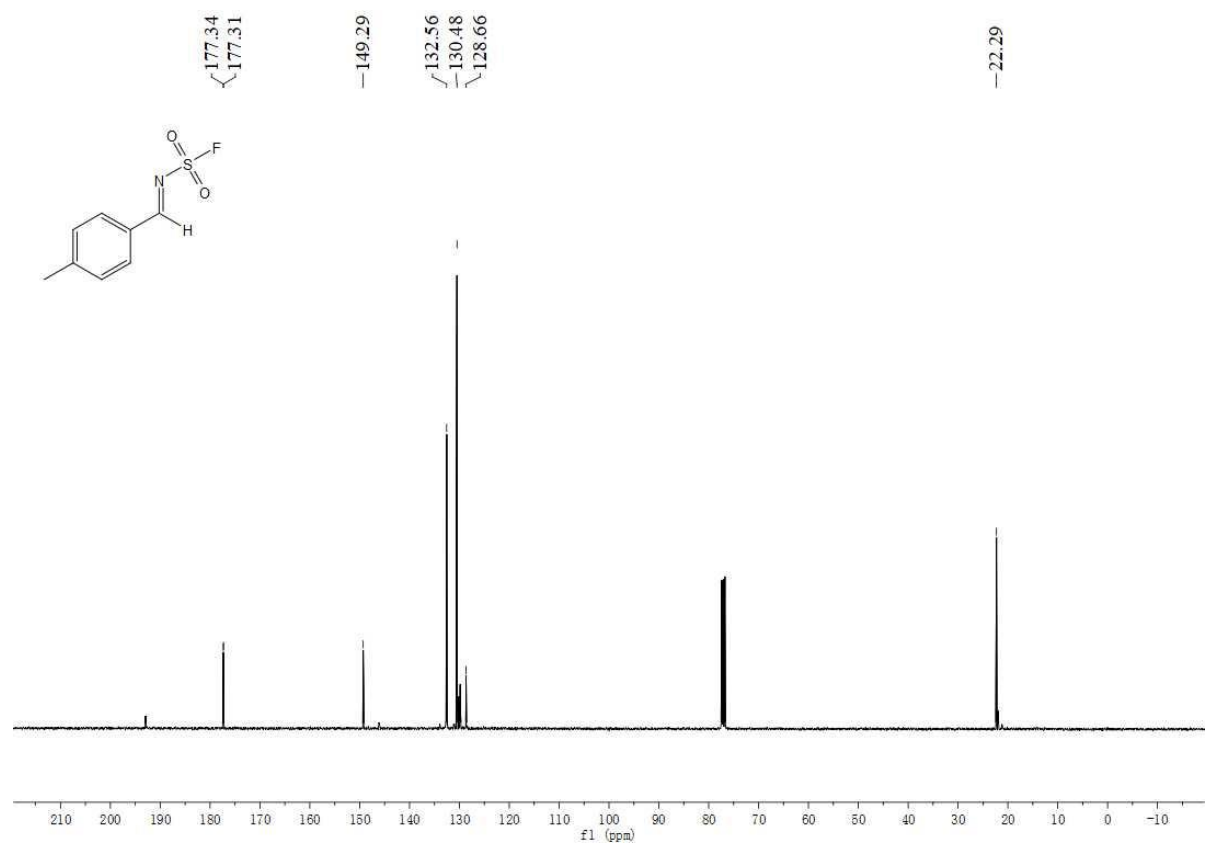

# <sup>19</sup>F NMR

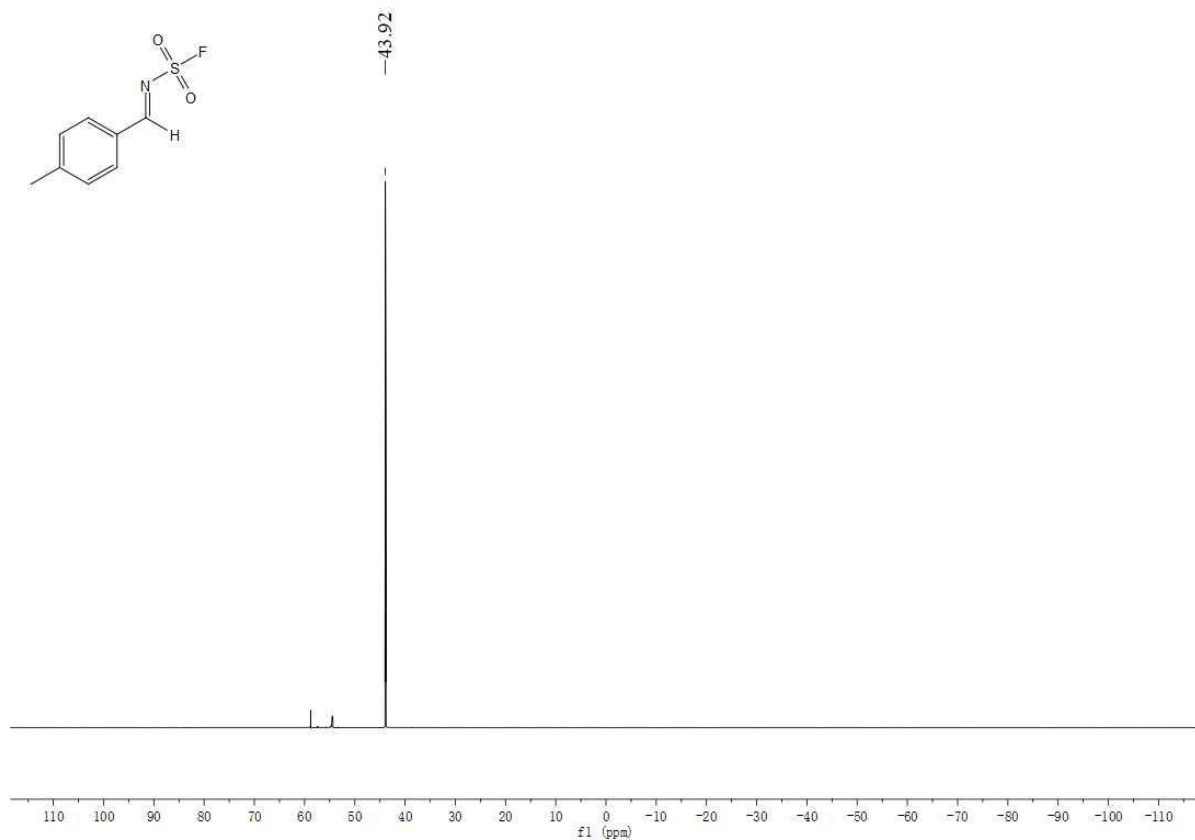

# (E)-4-(4-*tert*-butyl)benzylidene)sulfamoyl fluoride (2f)

## <sup>1</sup>H NMR

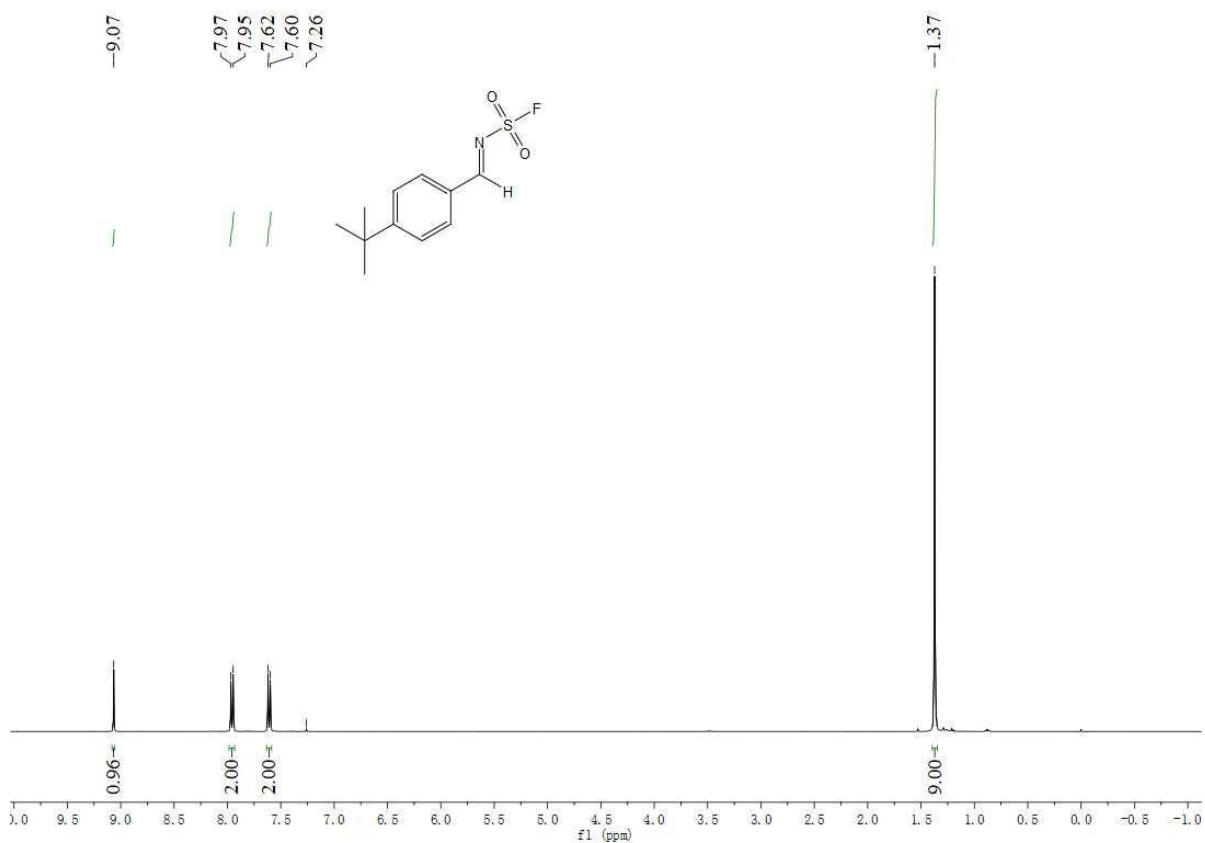



# <sup>13</sup>C NMR

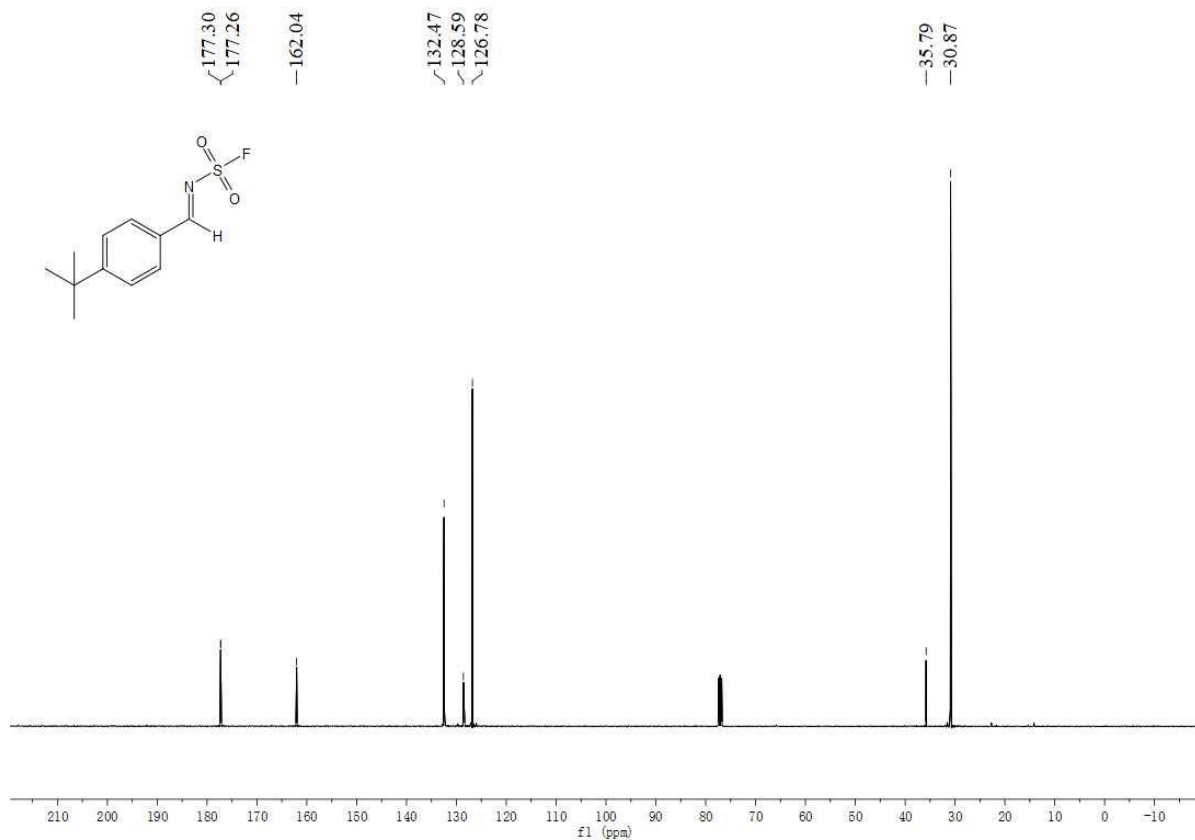

# <sup>19</sup>F NMR

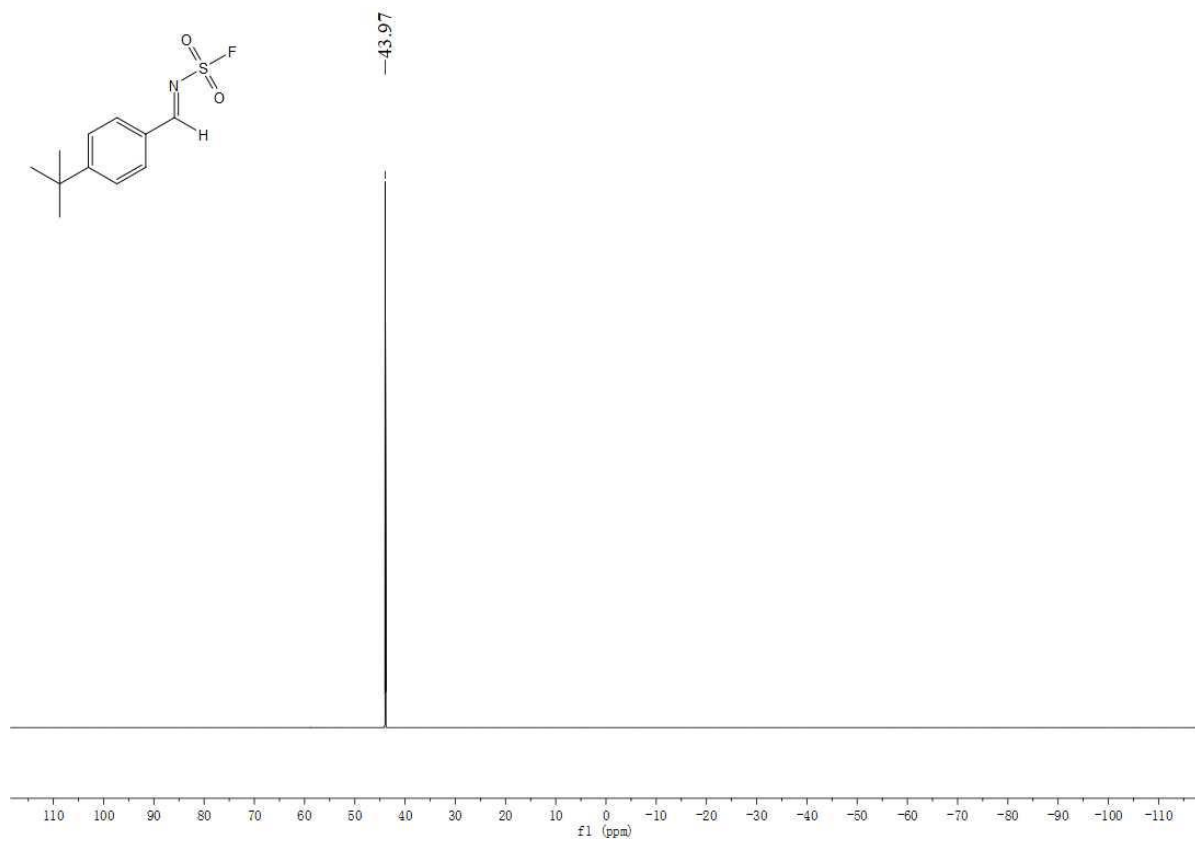

(E)-(2,4,6-trimethylbenzylidene)sulfamoyl fluoride (2g)

<sup>1</sup>H NMR

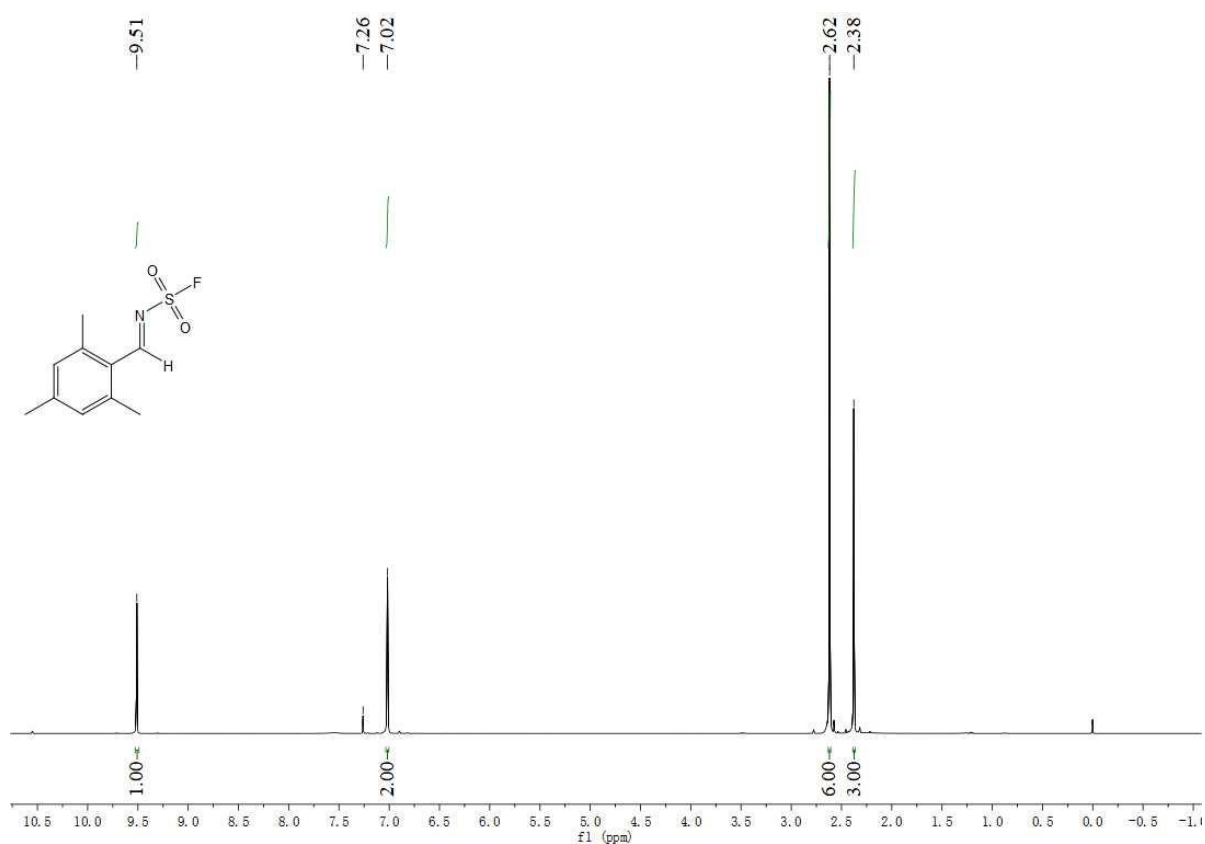

<sup>13</sup>C NMR

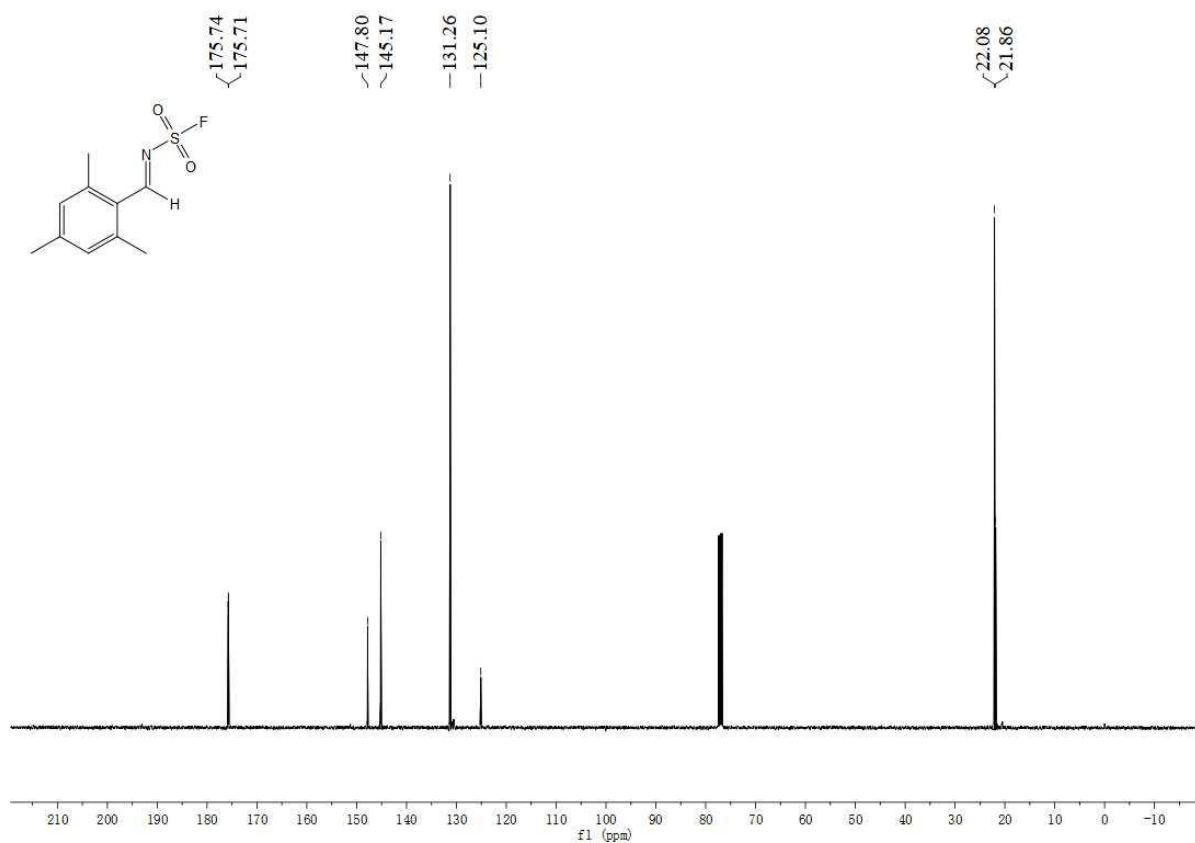

# <sup>19</sup>F NMR

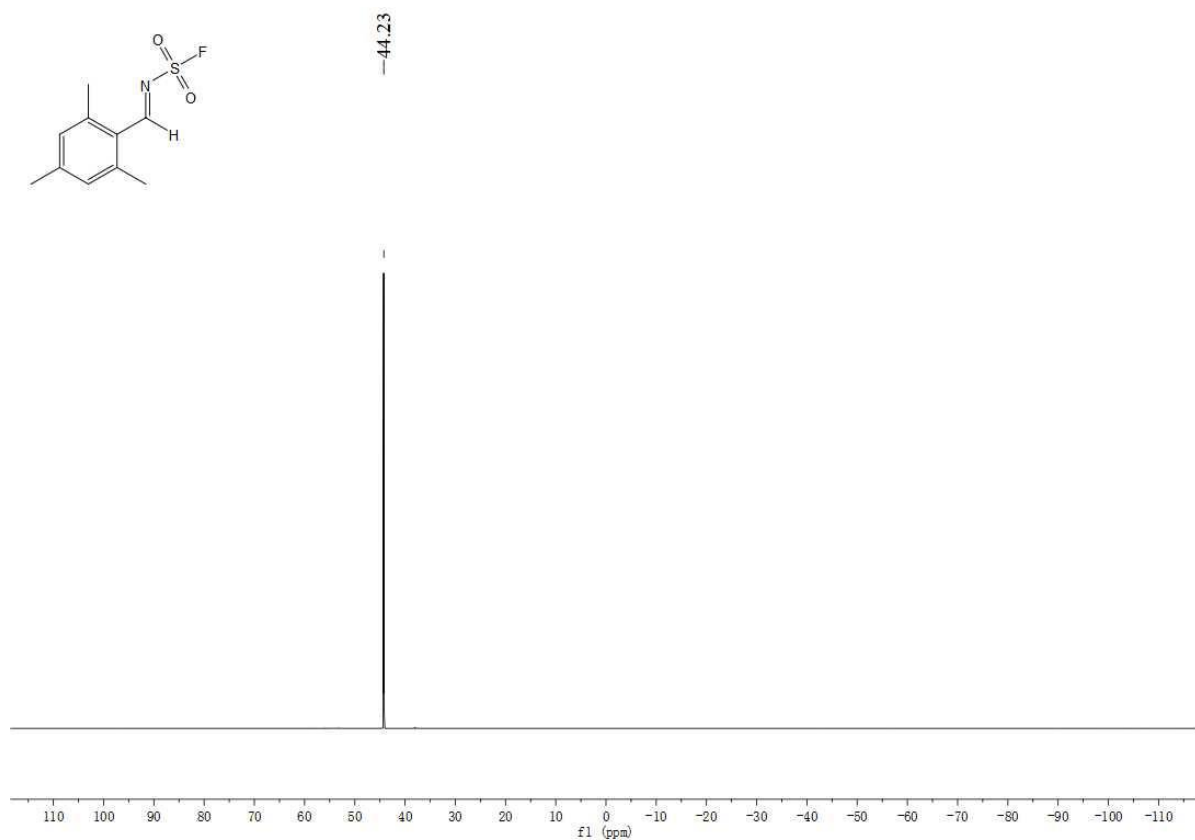

# (E)-(2,4,6-trimethoxybenzylidene)sulfamoyl fluoride (2h)

## <sup>1</sup>H NMR

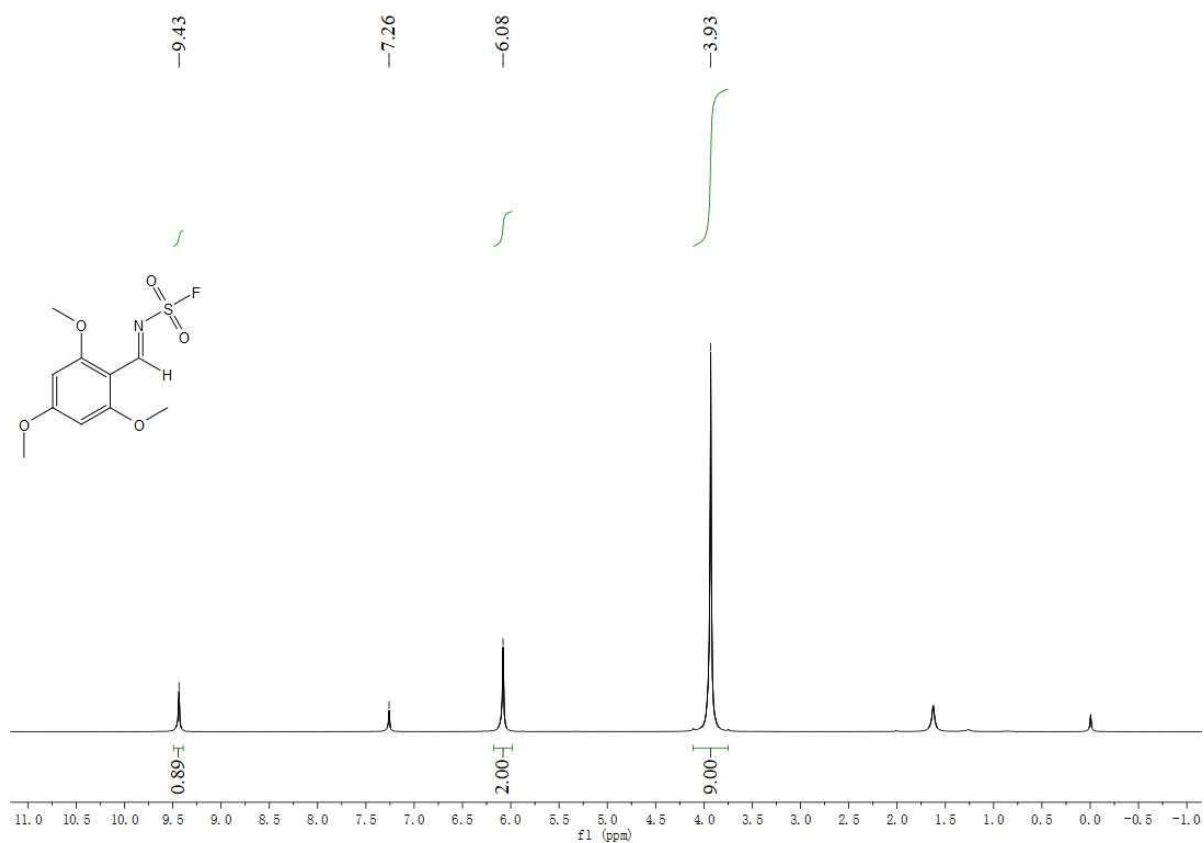

# <sup>13</sup>C NMR

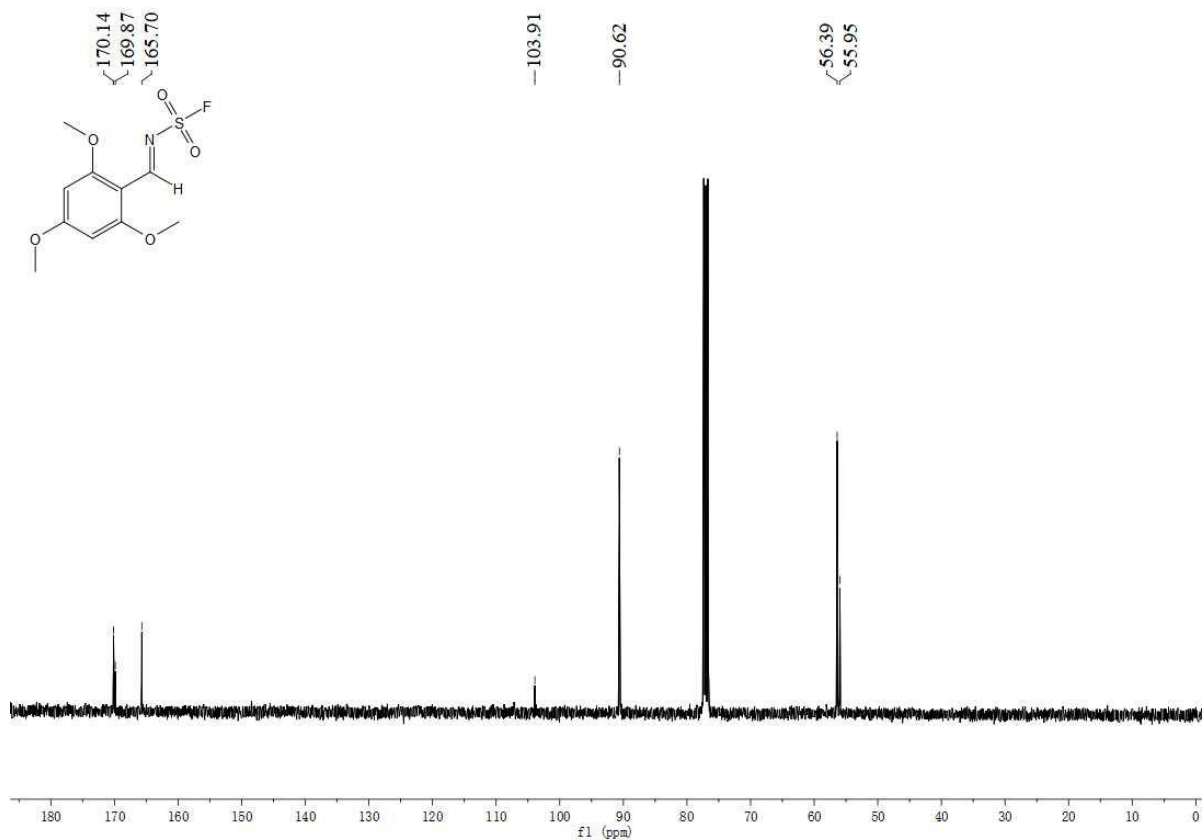

# <sup>19</sup>F NMR

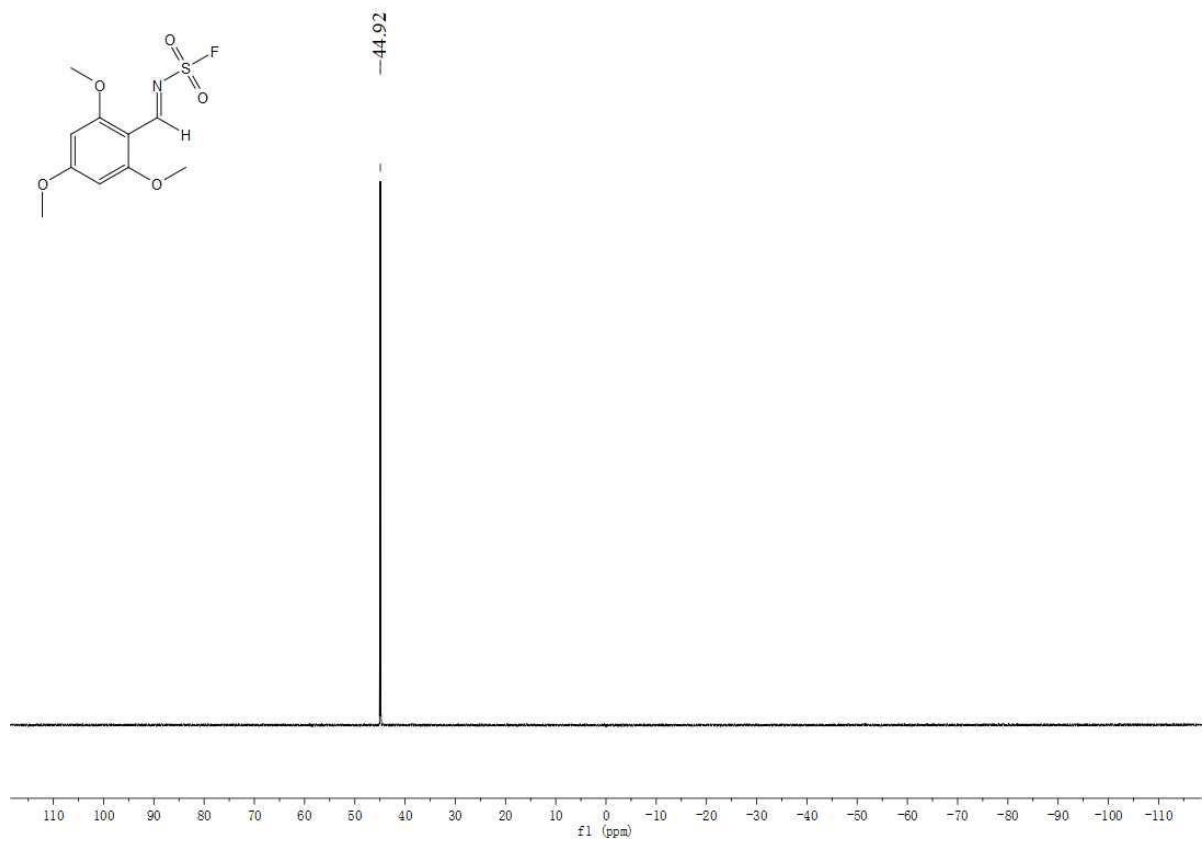

(E)-(naphthalen-1-ylmethylene)sulfamoyl fluoride (2i)

<sup>1</sup>H NMR

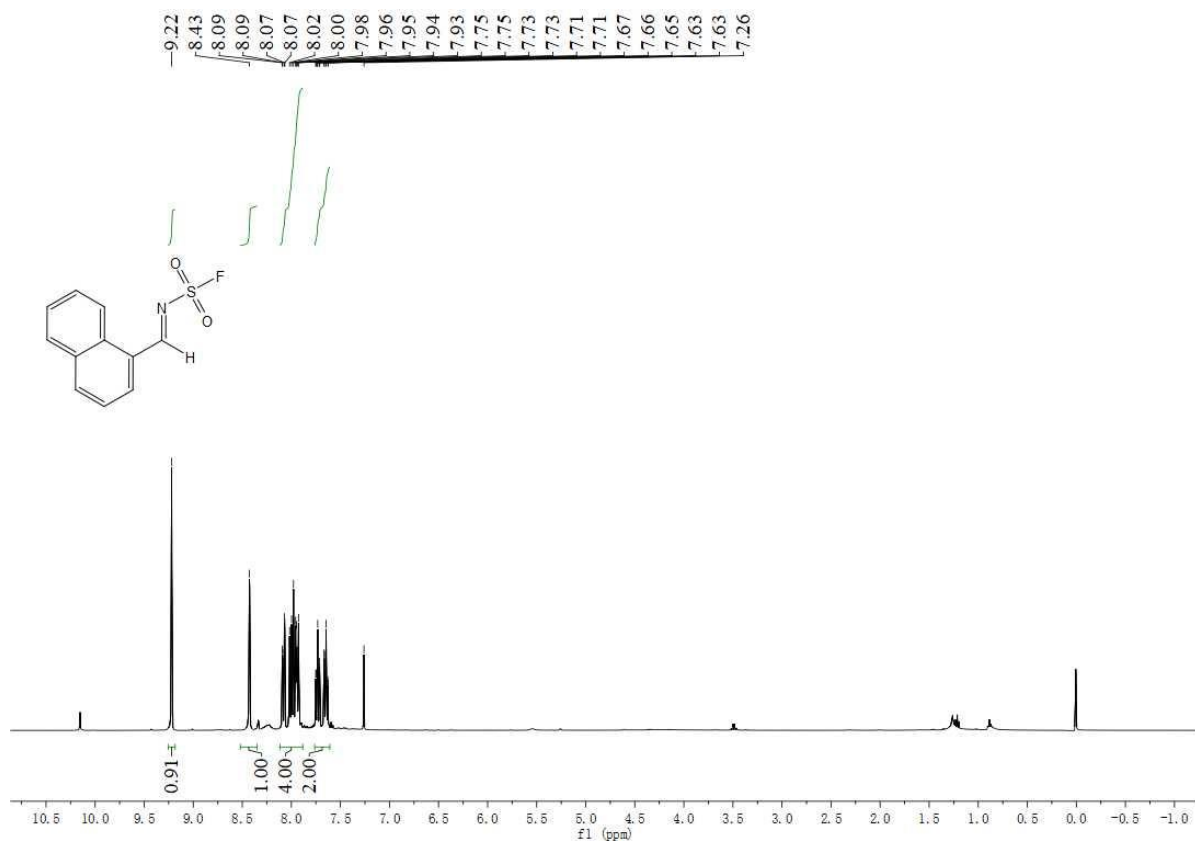

<sup>13</sup>C NMR

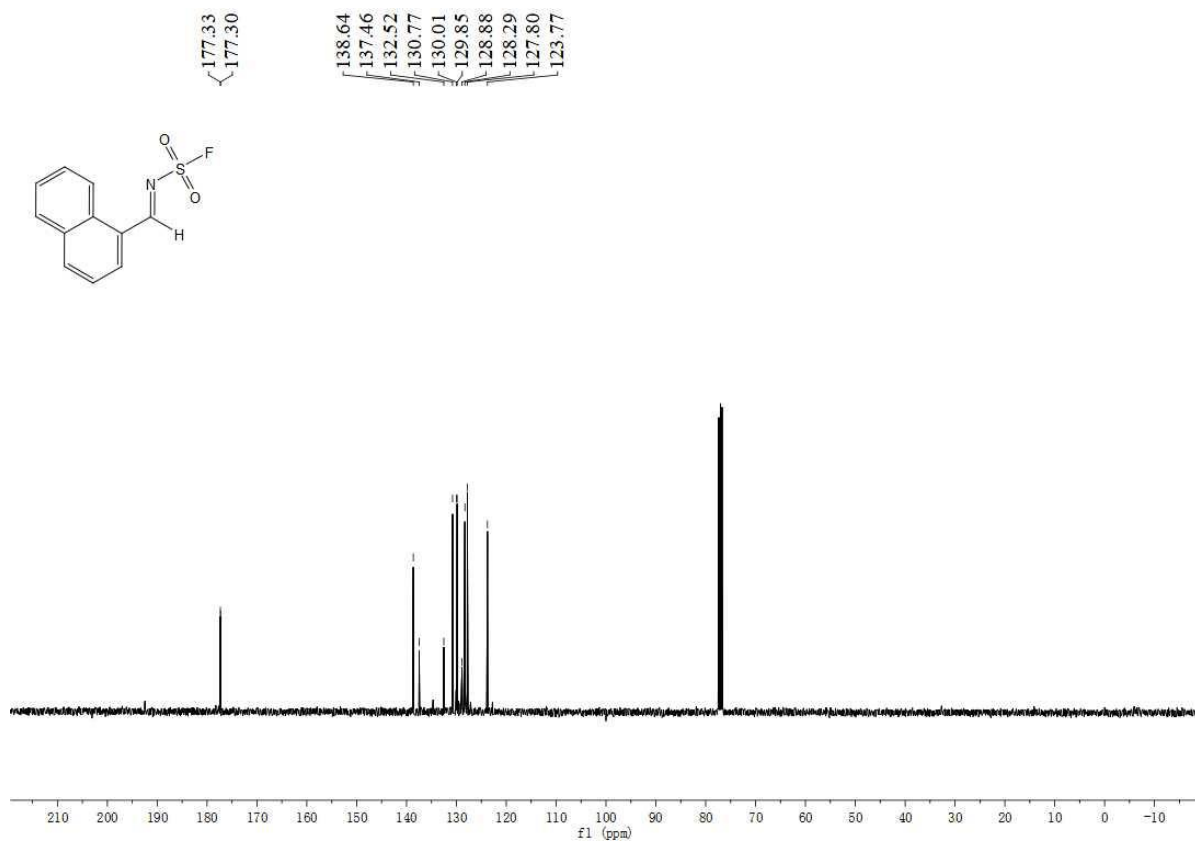

# <sup>19</sup>F NMR

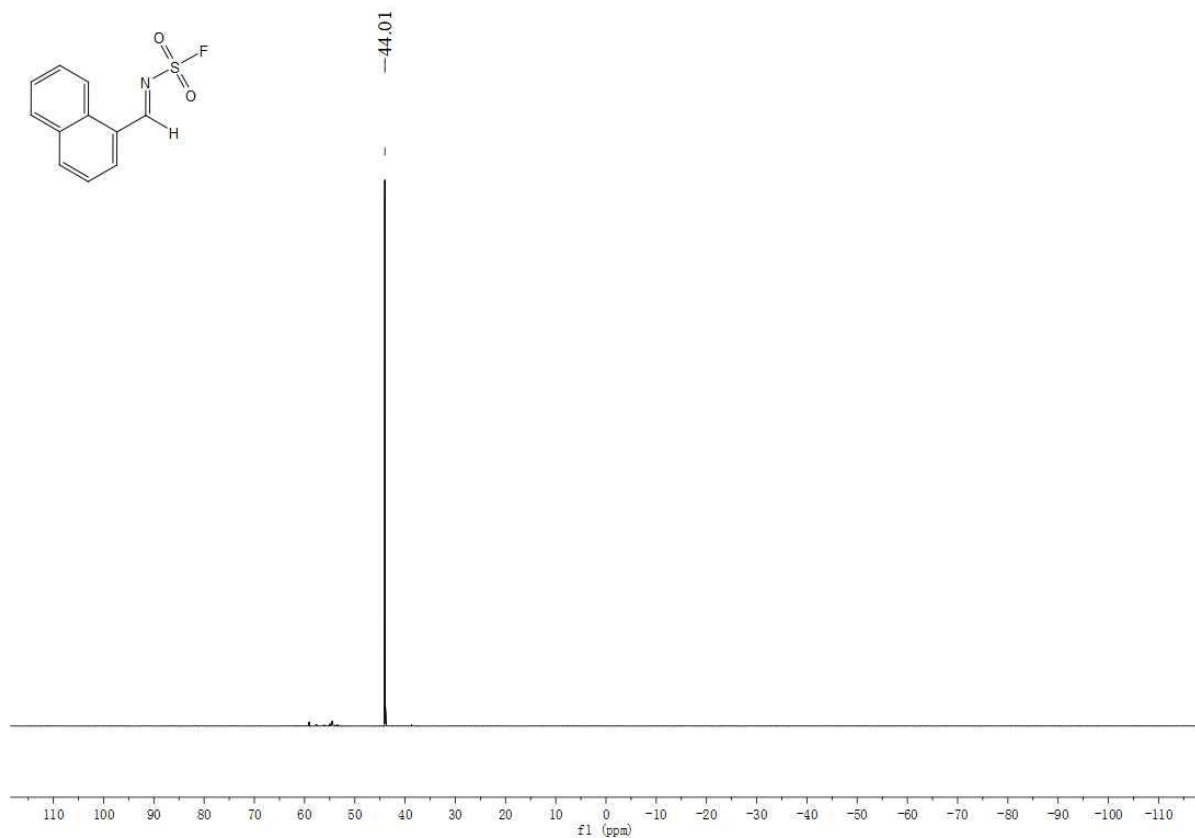

## (E)-[1,1'-biphenyl]-2-yl((fluorosulfonyl)imino)methanide (2j)

### <sup>1</sup>H NMR

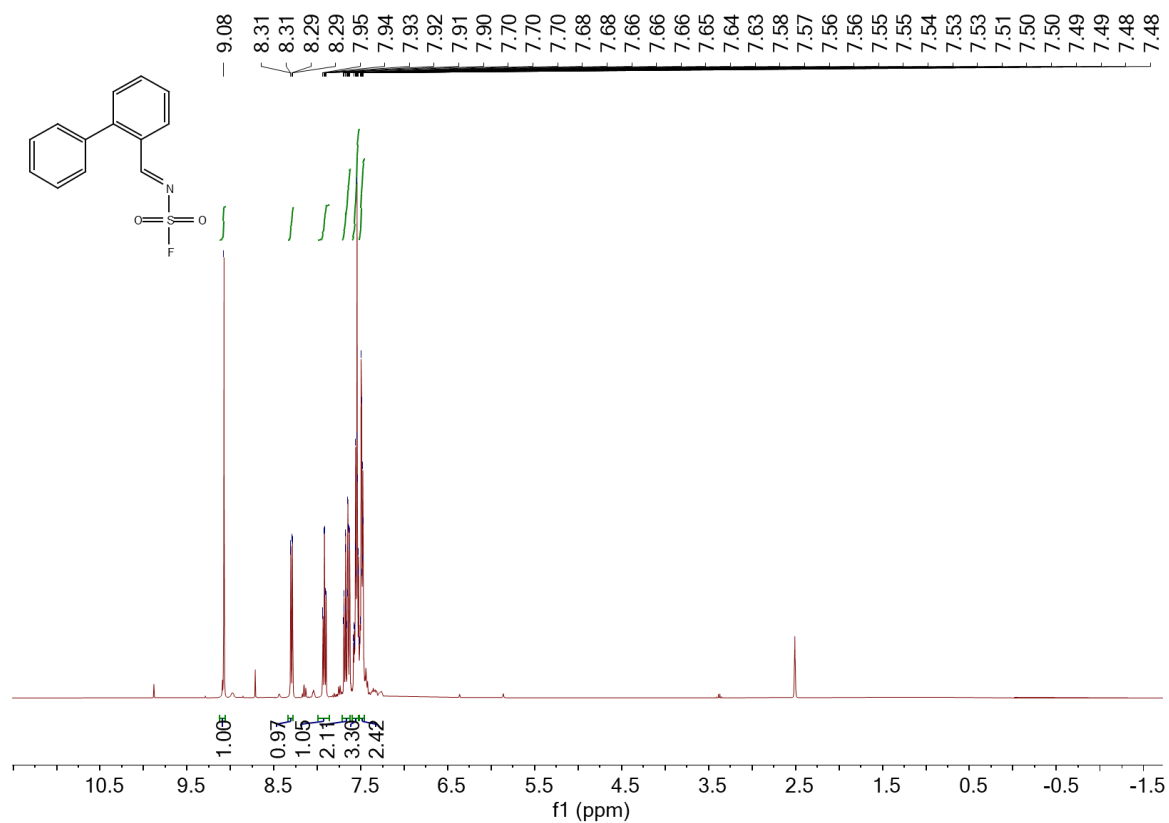

# <sup>13</sup>C NMR

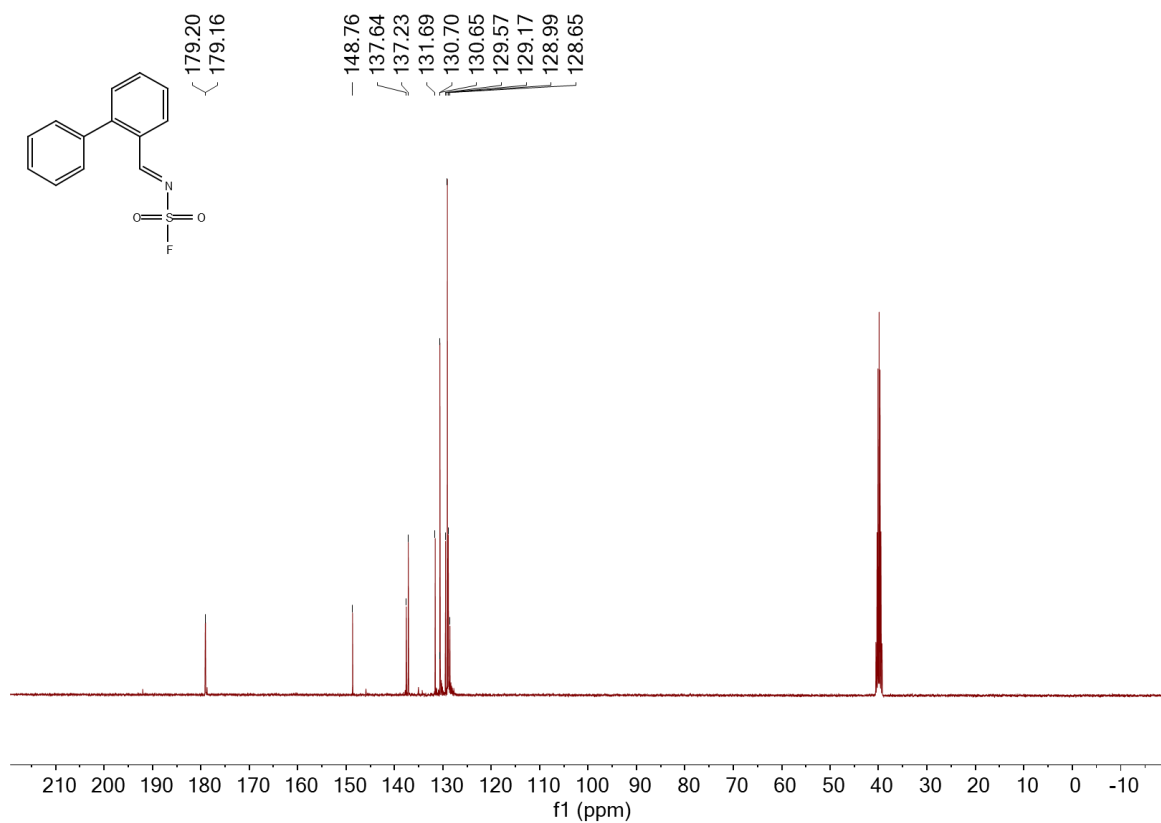

# <sup>19</sup>F NMR

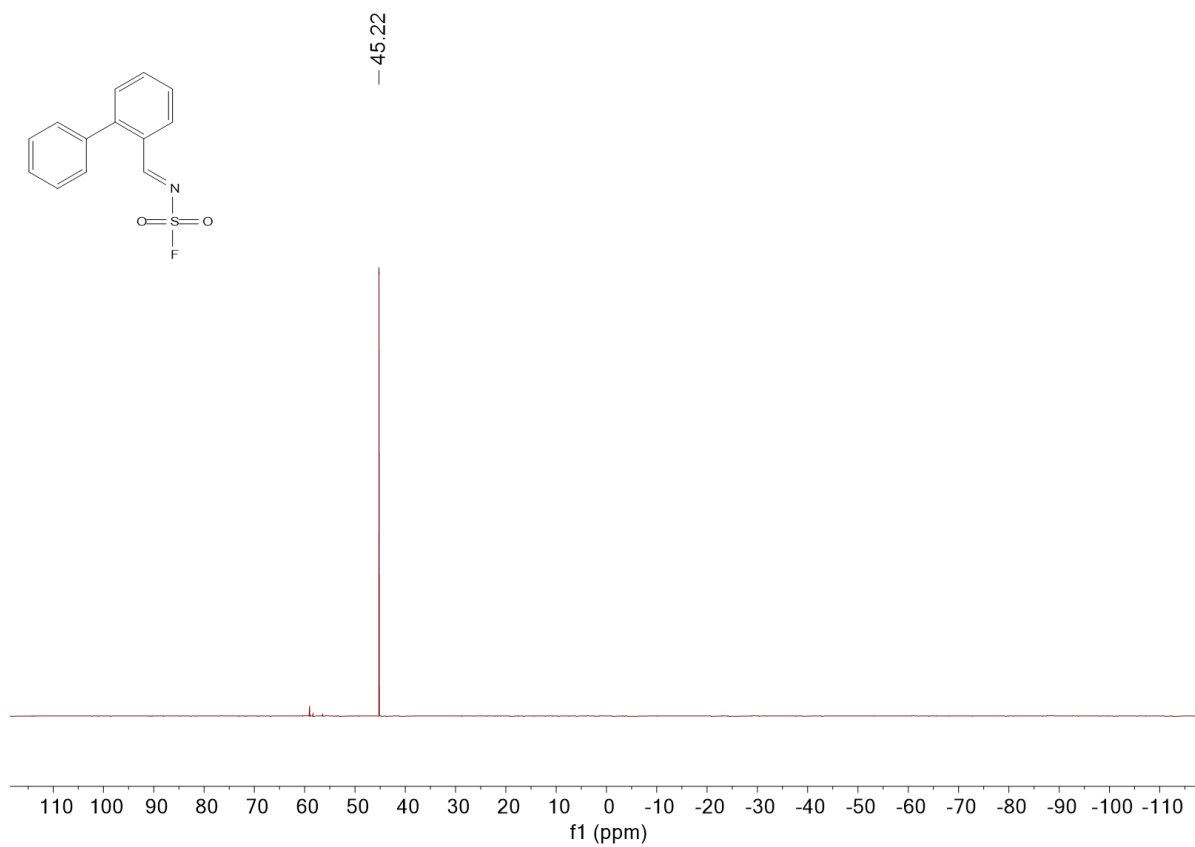

4-phenylbutane-1-sulfonyl fluoride (4a)

<sup>1</sup>H NMR

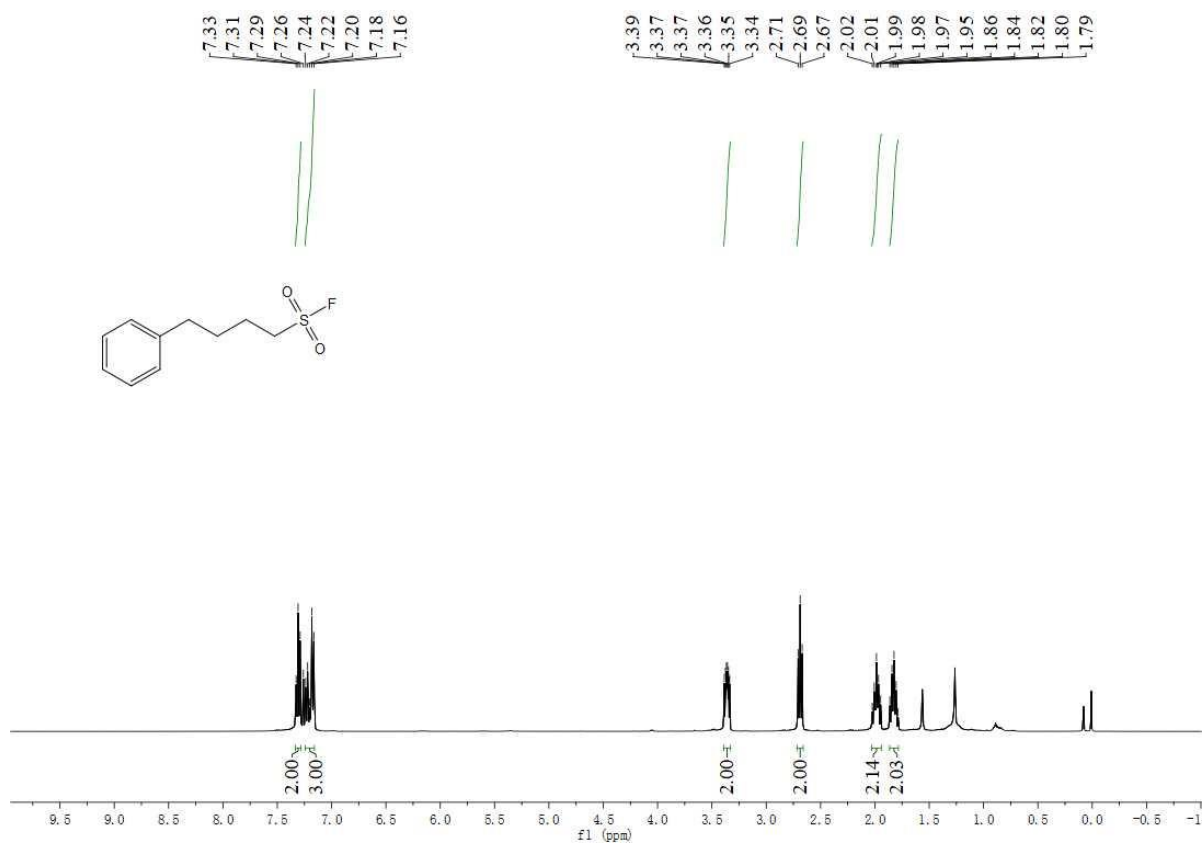

<sup>13</sup>C NMR

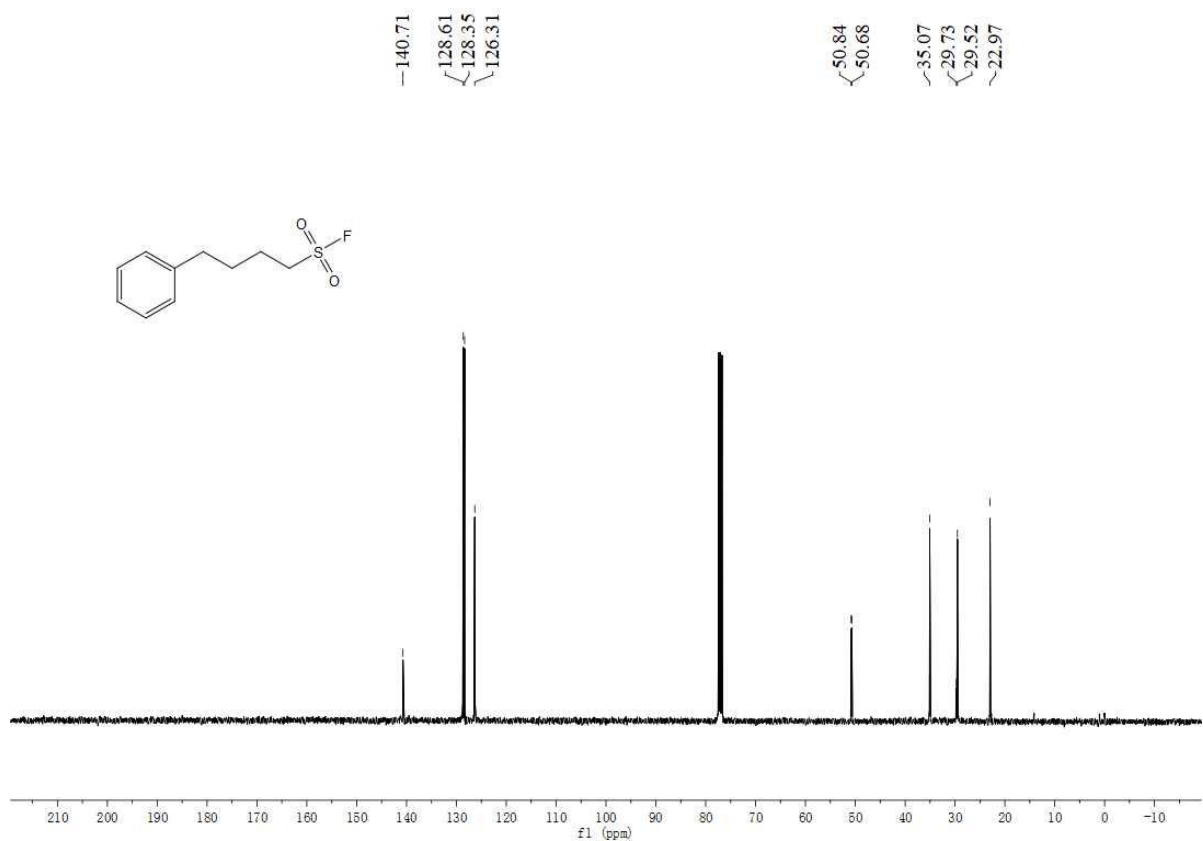



# <sup>19</sup>F NMR

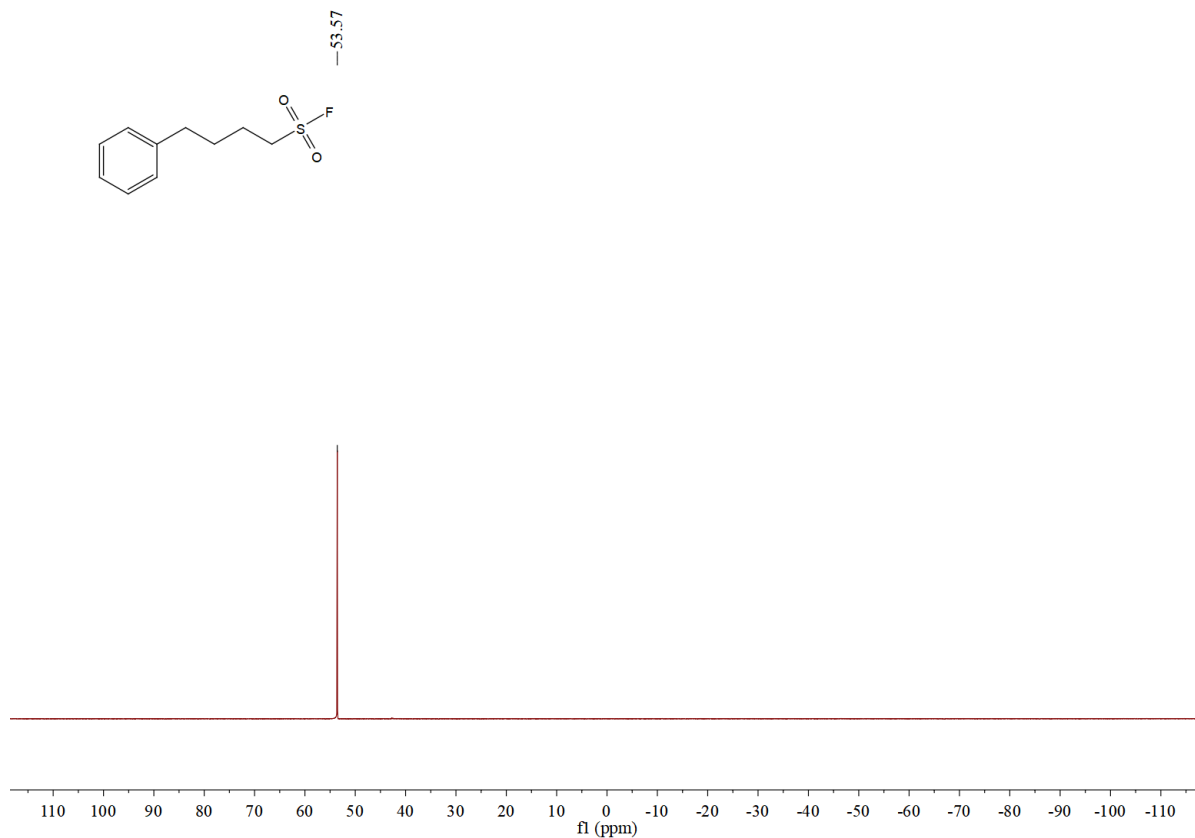

## 3-(1,3-dioxisoindolin-2-yl)propane-1-sulfonyl fluoride (4b)

### <sup>1</sup>H NMR

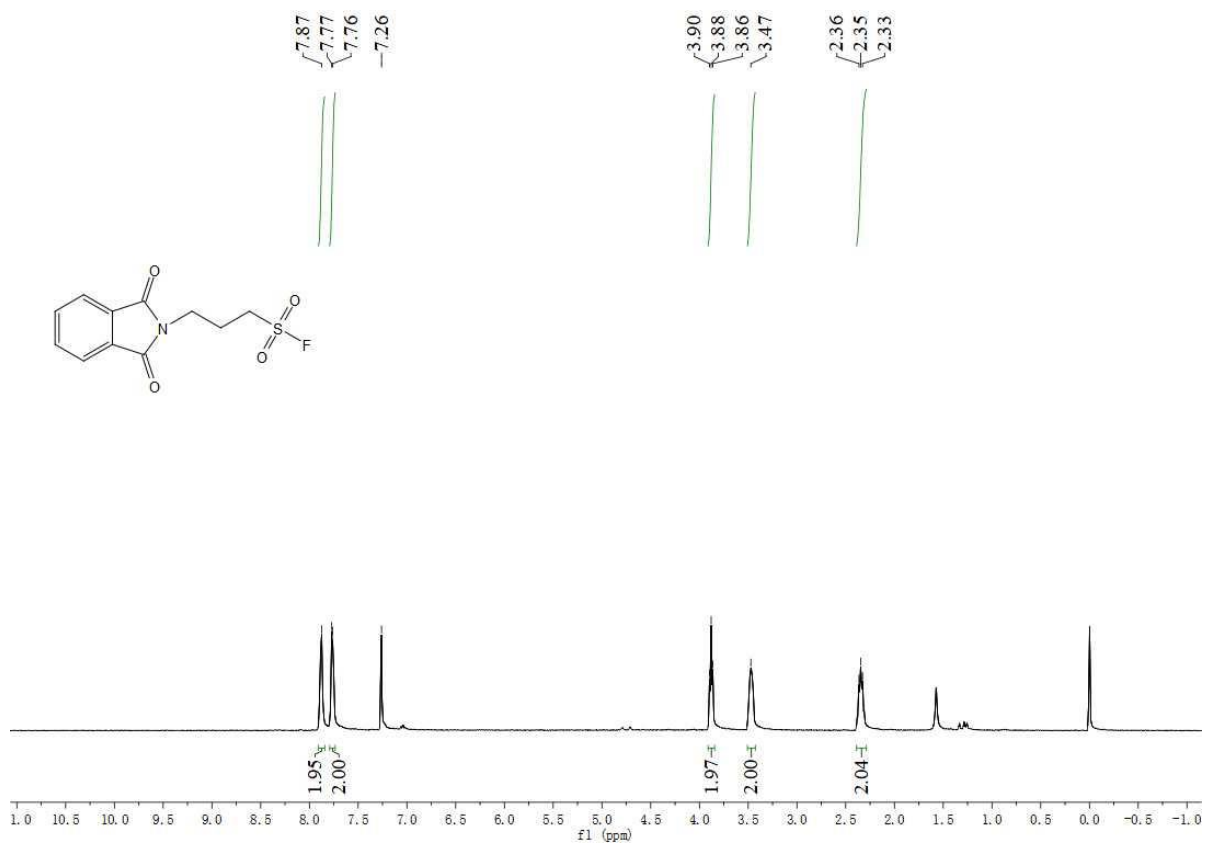

# <sup>13</sup>C NMR

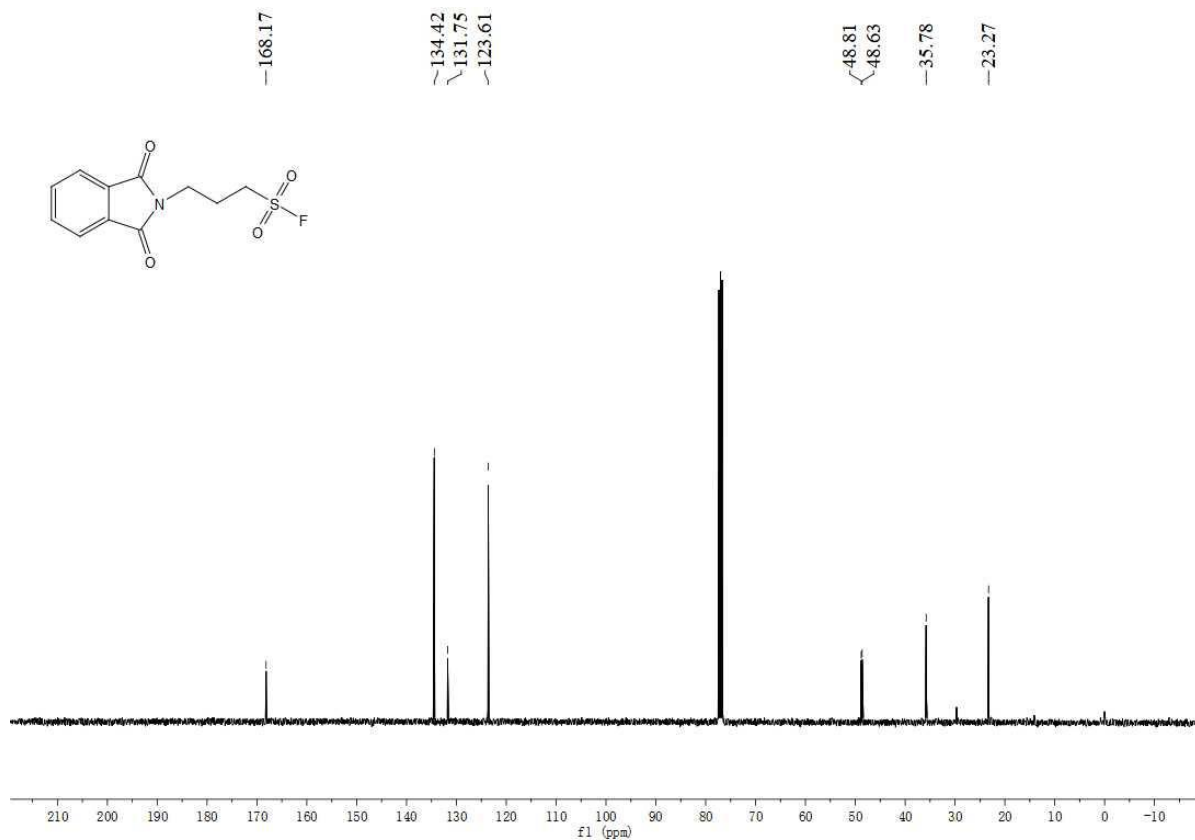

# <sup>19</sup>F NMR

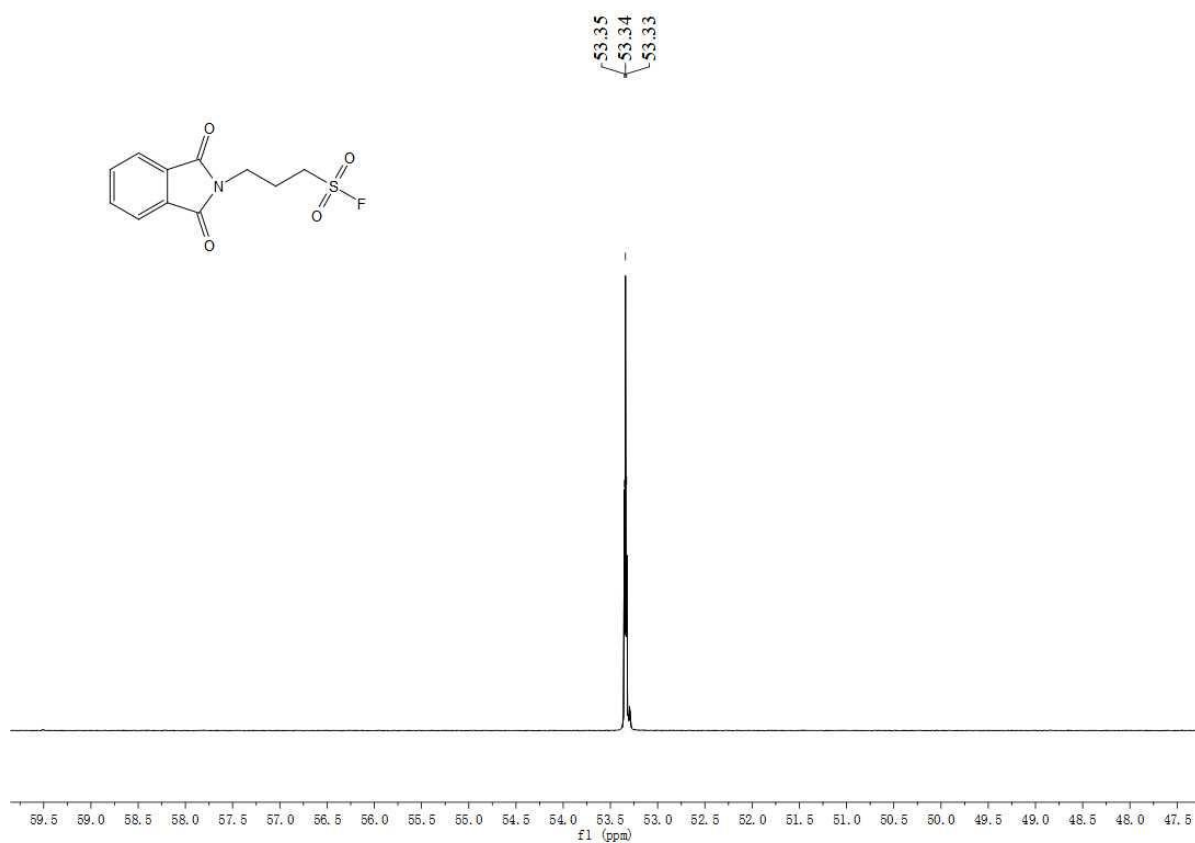

5-(1,3-dioxisoindolin-2-yl)pentane-1-sulfonyl fluoride (**4c**)

<sup>1</sup>H NMR

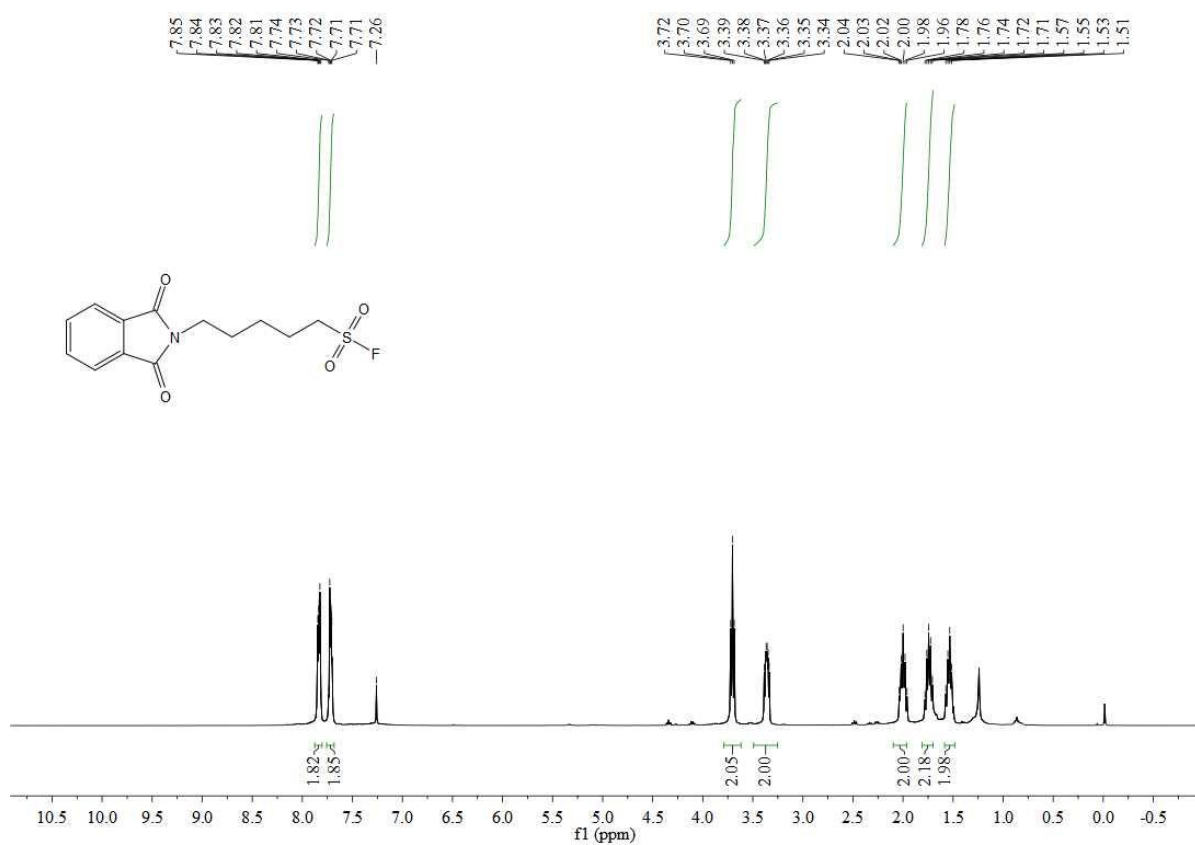

<sup>13</sup>C NMR

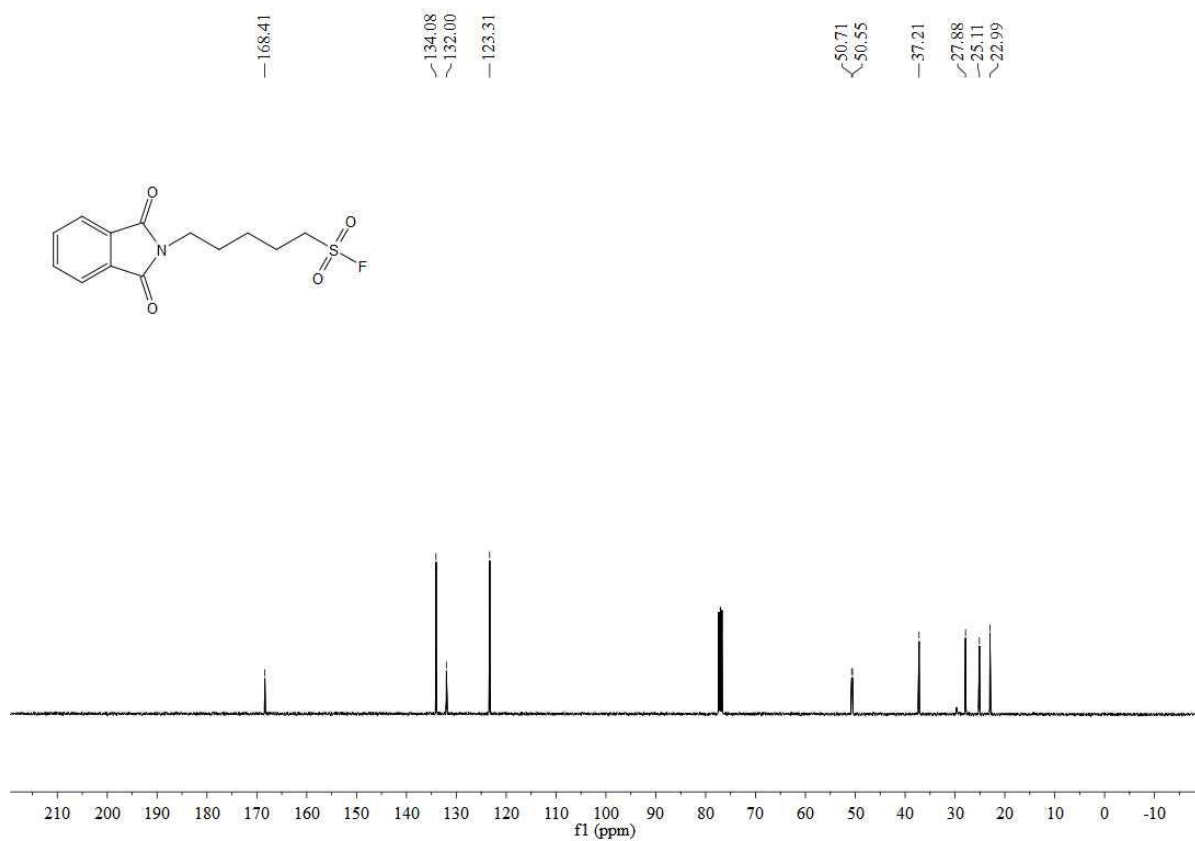

# <sup>19</sup>F NMR

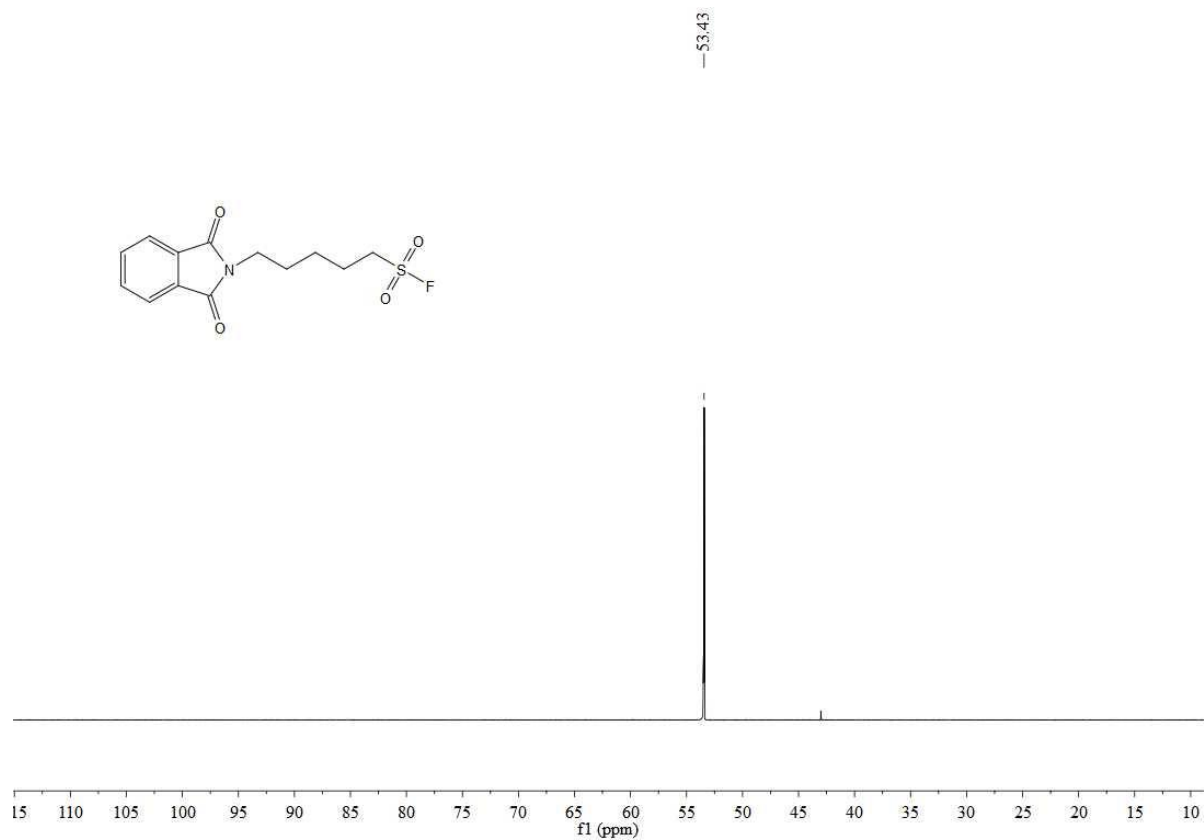

## 5-(1,1-dioxido-3-oxobenzodisothiazol-2(3H)-yl)pentane-1-sulfonyl fluoride (4d)

### <sup>1</sup>H NMR

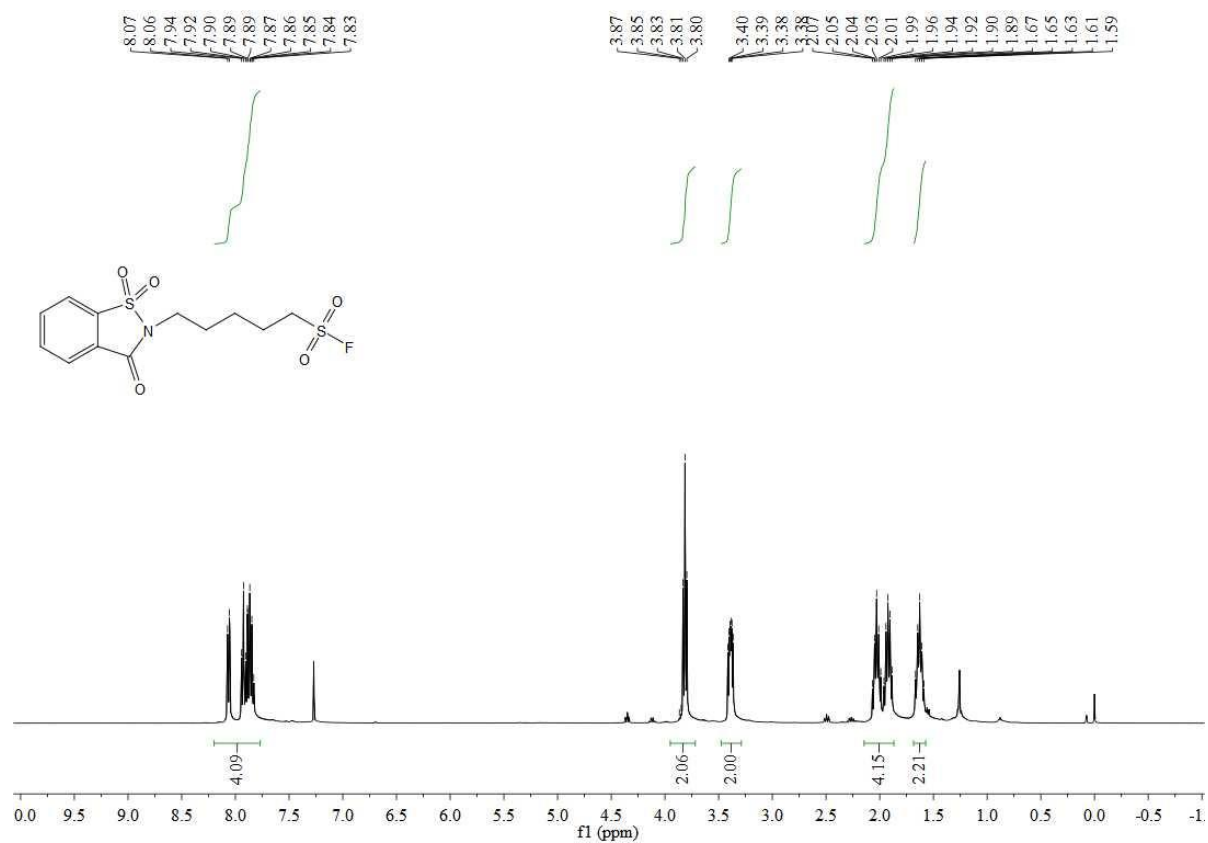

# <sup>13</sup>C NMR

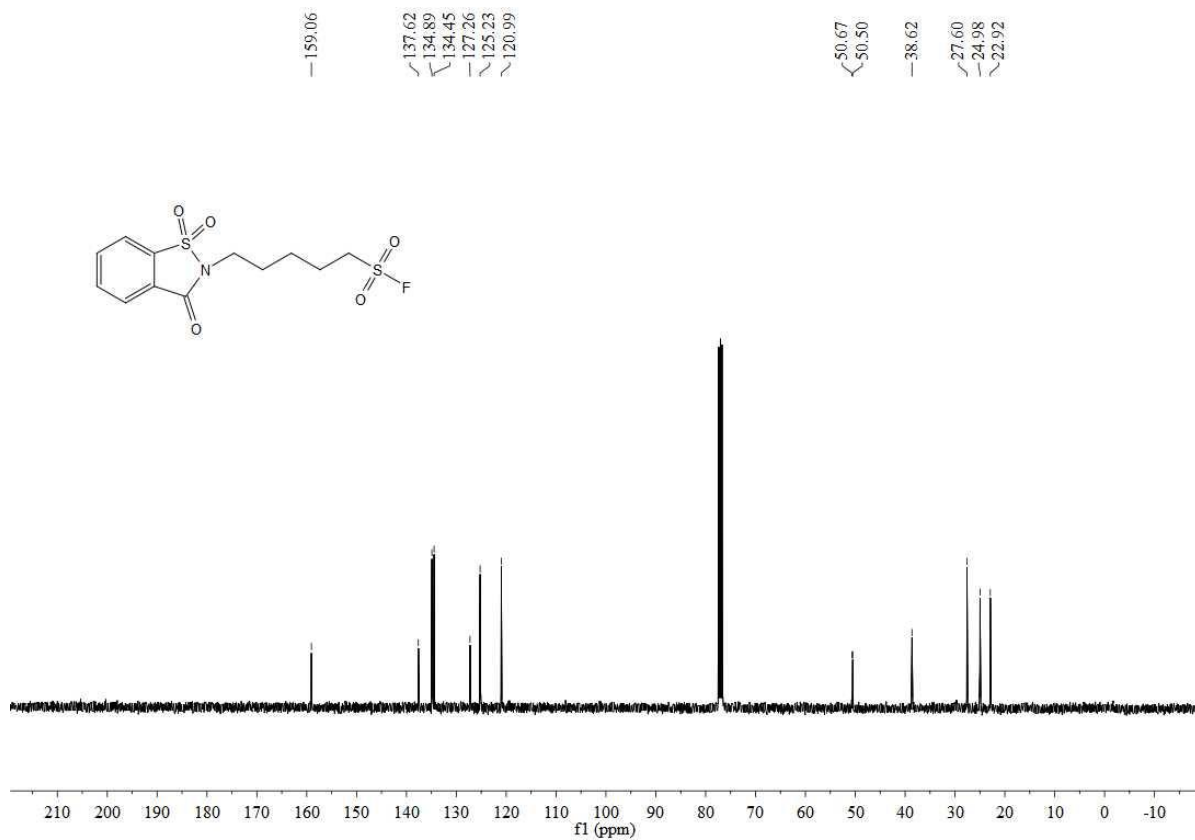

# <sup>19</sup>F NMR

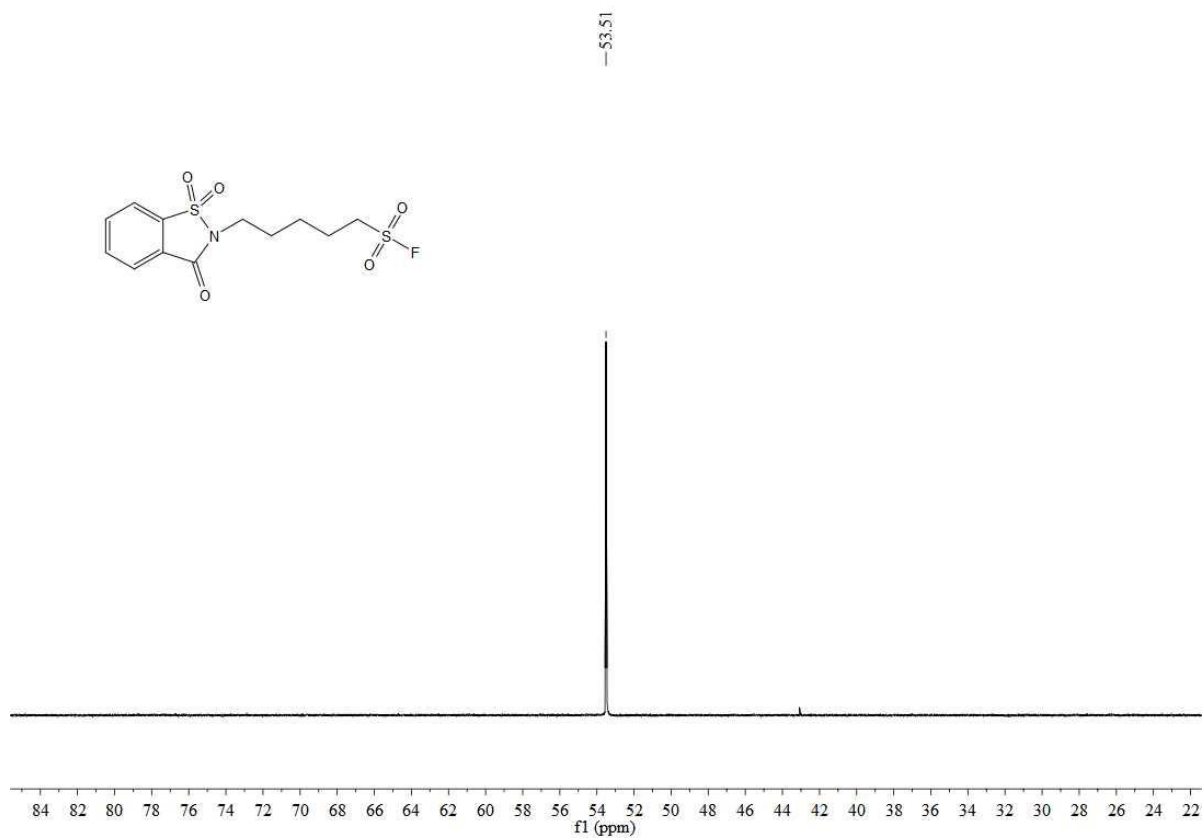

5-bromopentane-1-sulfonyl fluoride (4e)

<sup>1</sup>H NMR

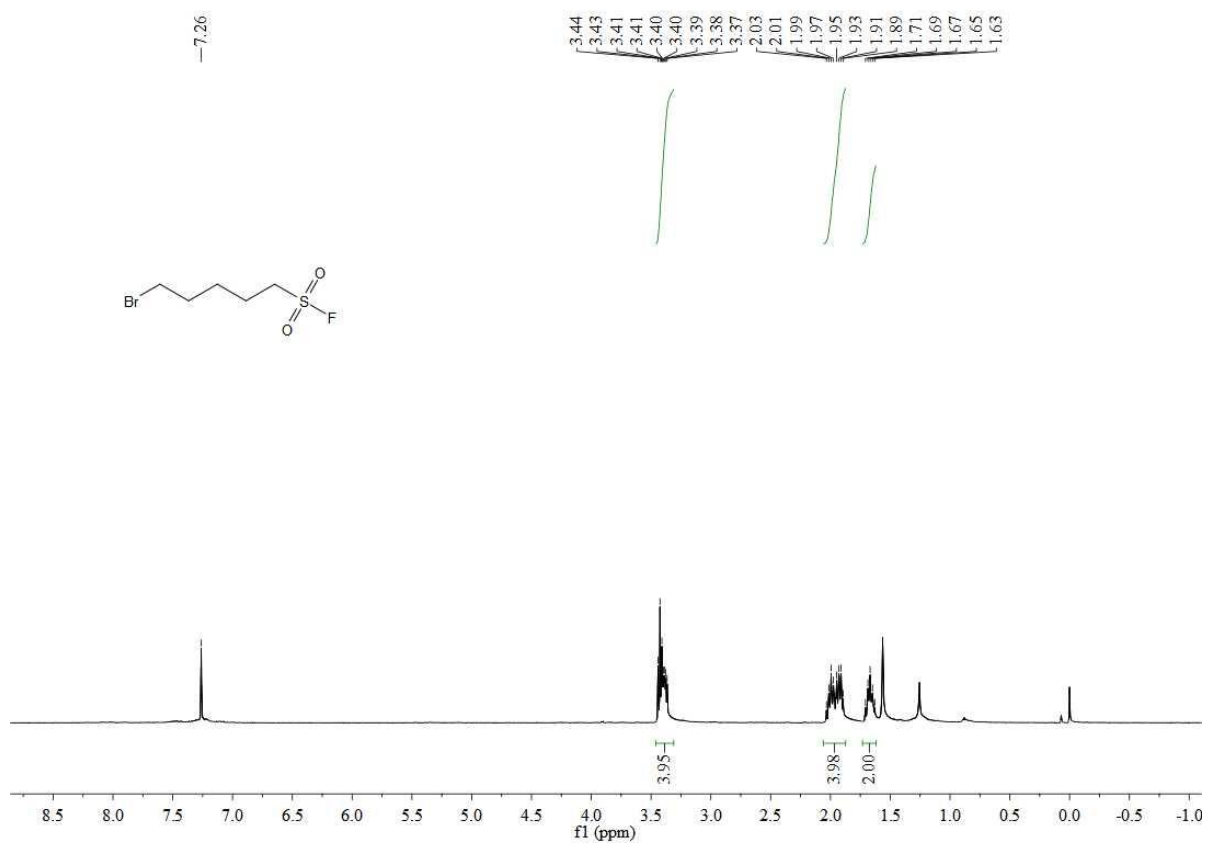

<sup>13</sup>C NMR

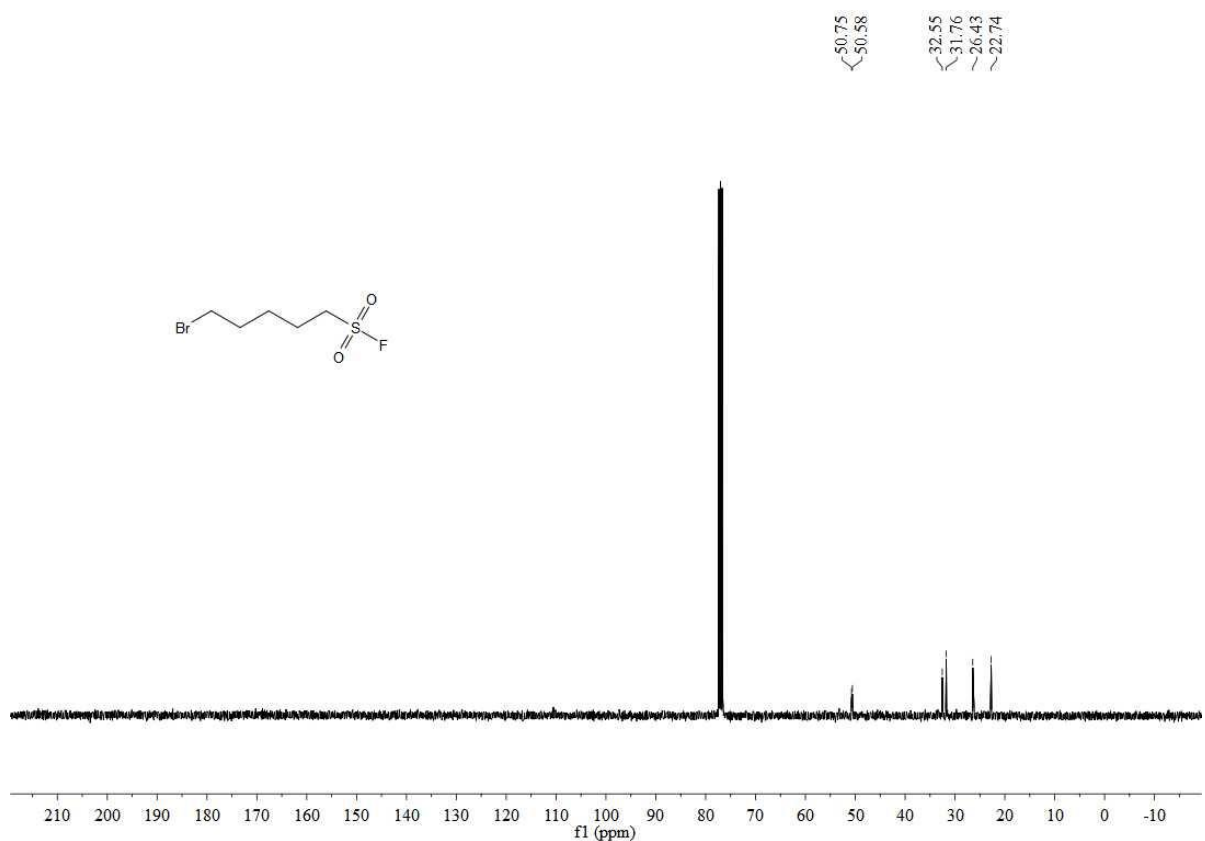

# <sup>19</sup>F NMR

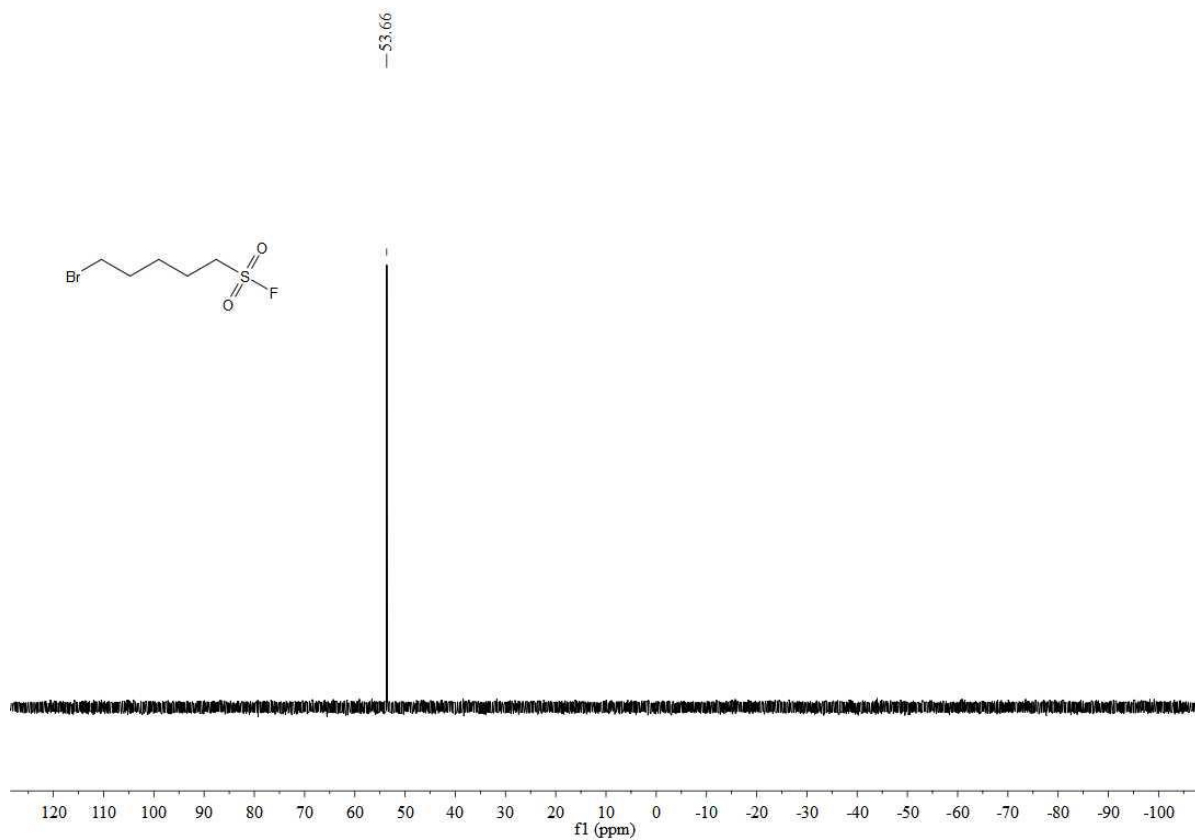

# decane-1-sulfonyl fluoride (4f)

## <sup>1</sup>H NMR

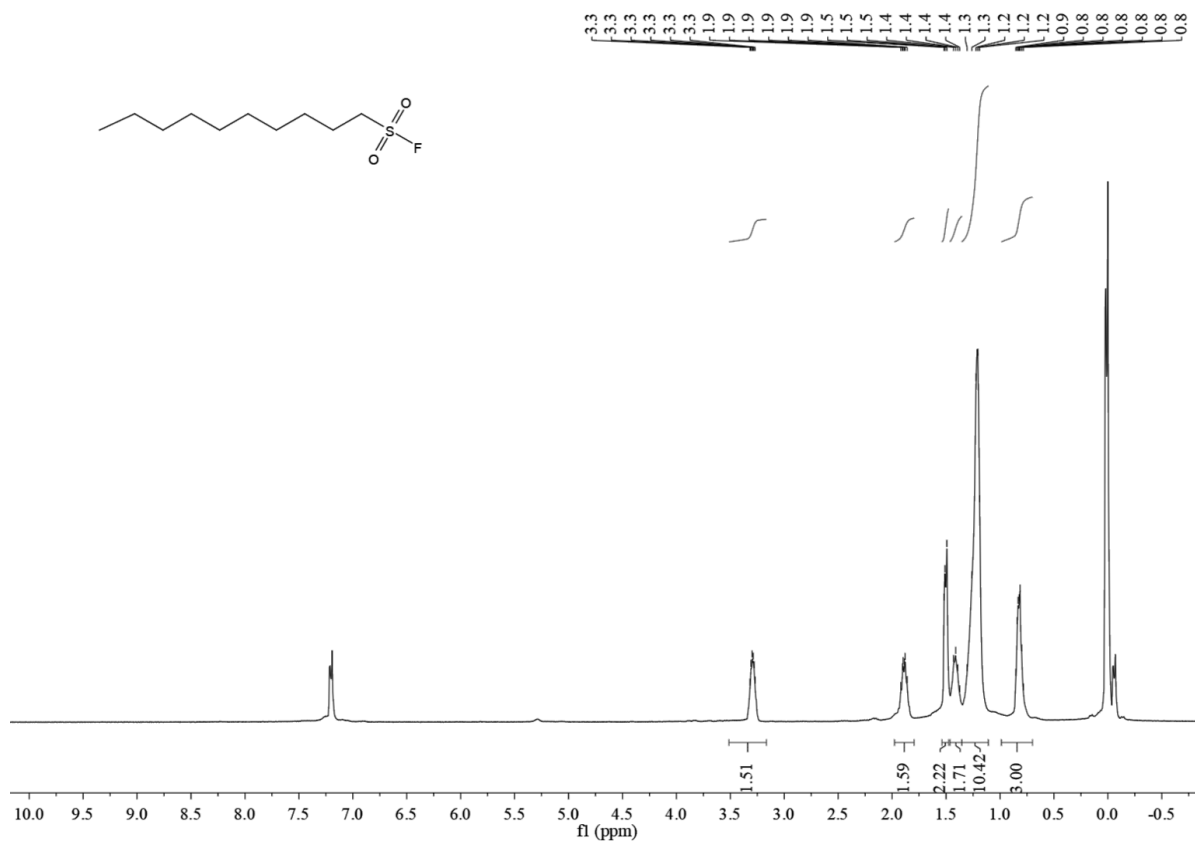

# <sup>13</sup>C NMR

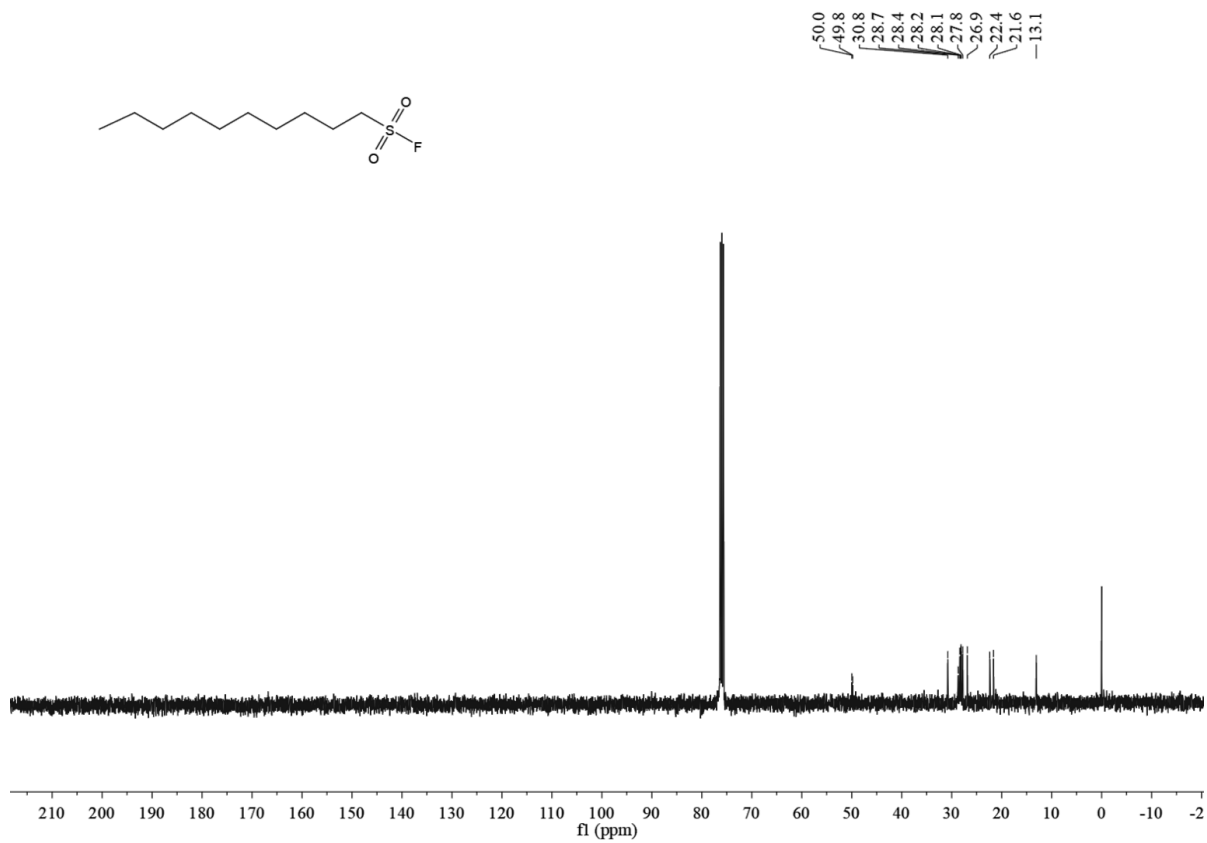

# <sup>19</sup>F NMR

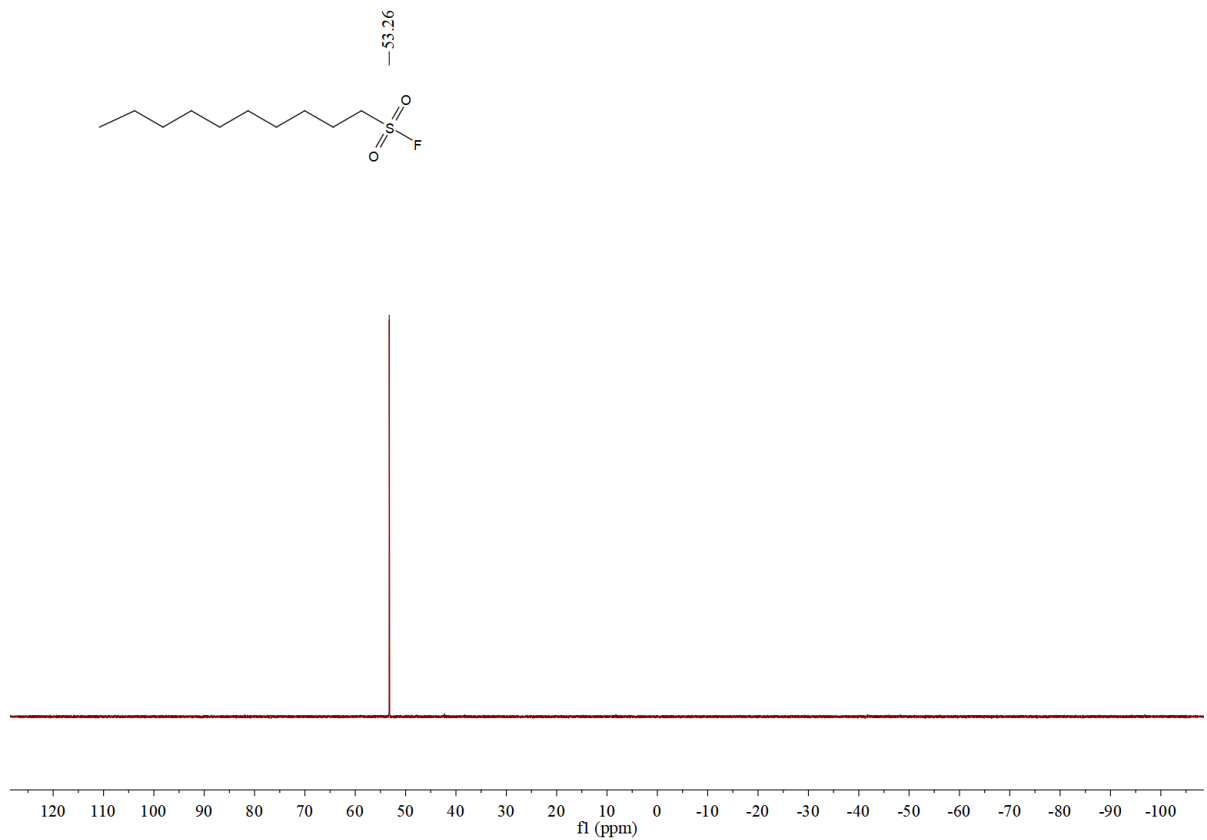



# 5-(fluorosulfonyl)pentyl benzoate (4g)

## <sup>1</sup>H NMR

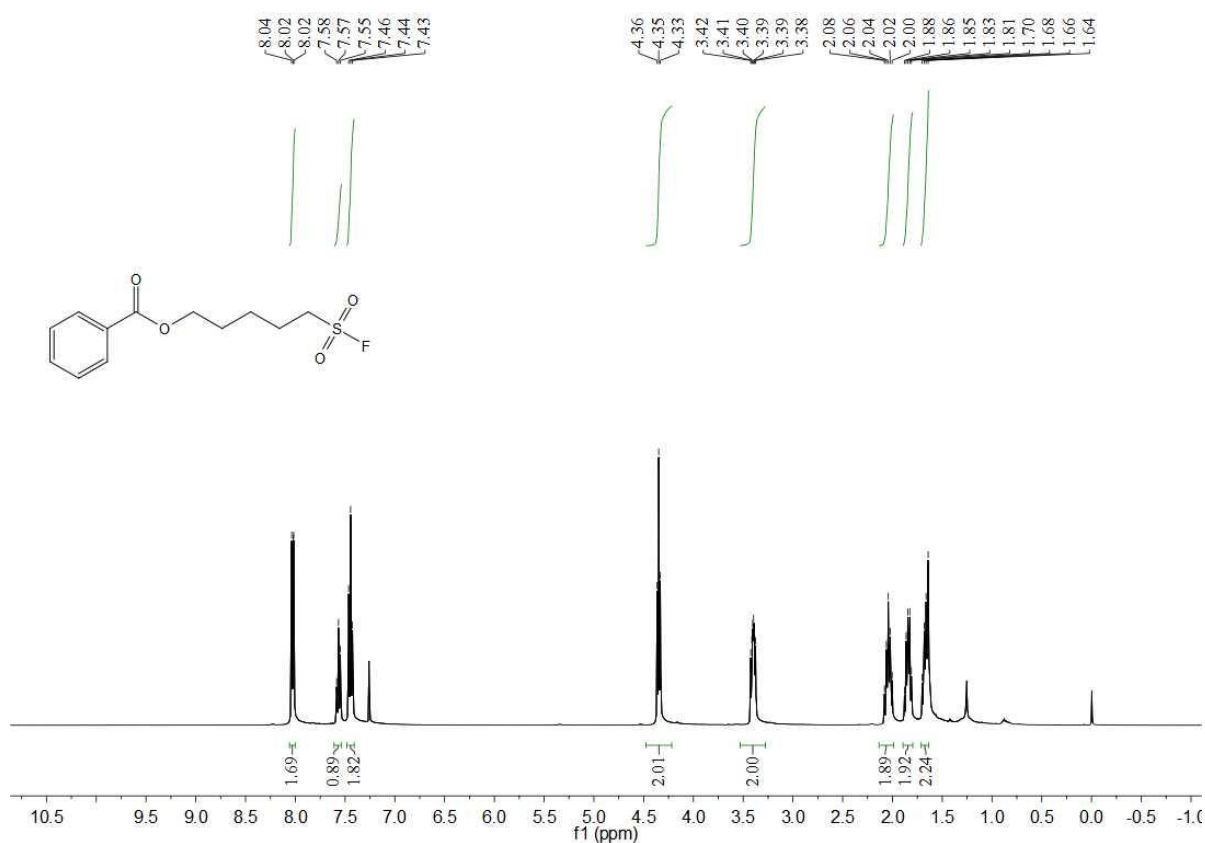

## <sup>13</sup>C NMR

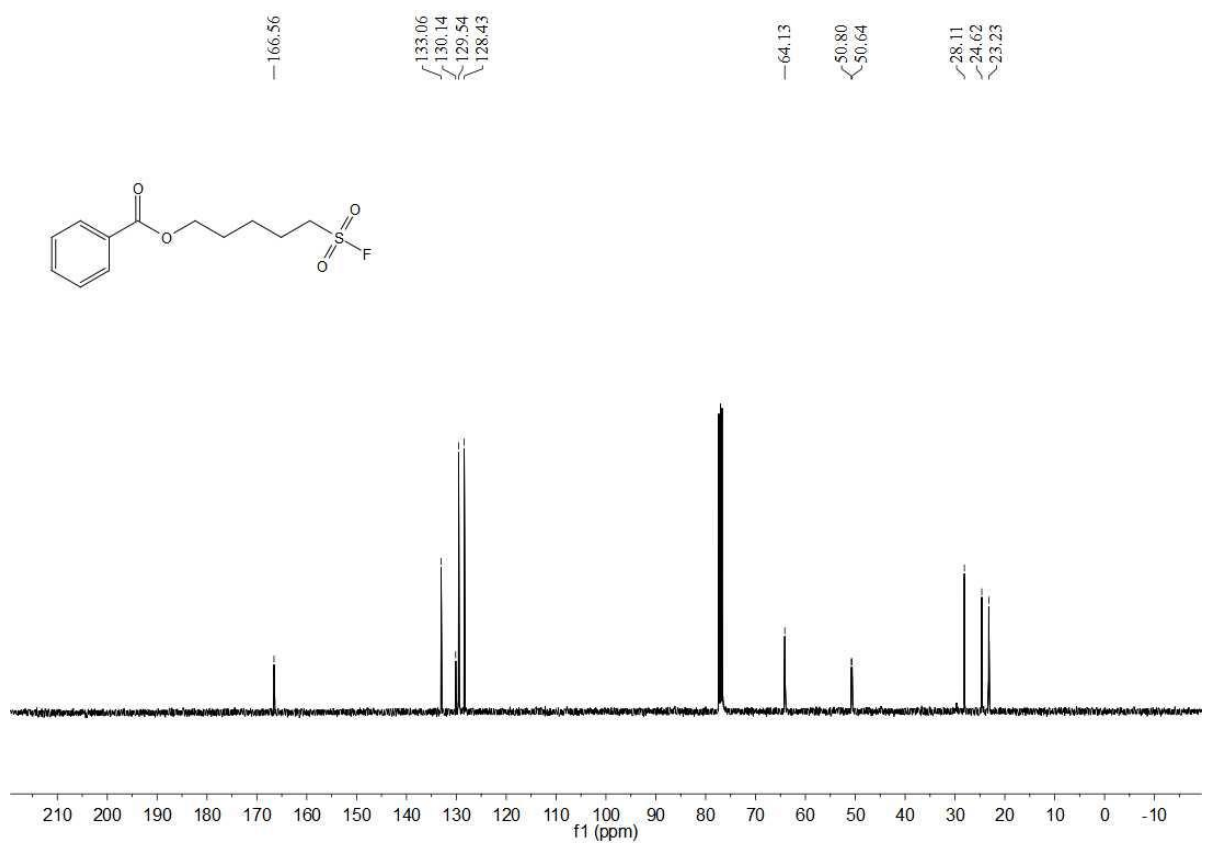

# <sup>19</sup>F NMR

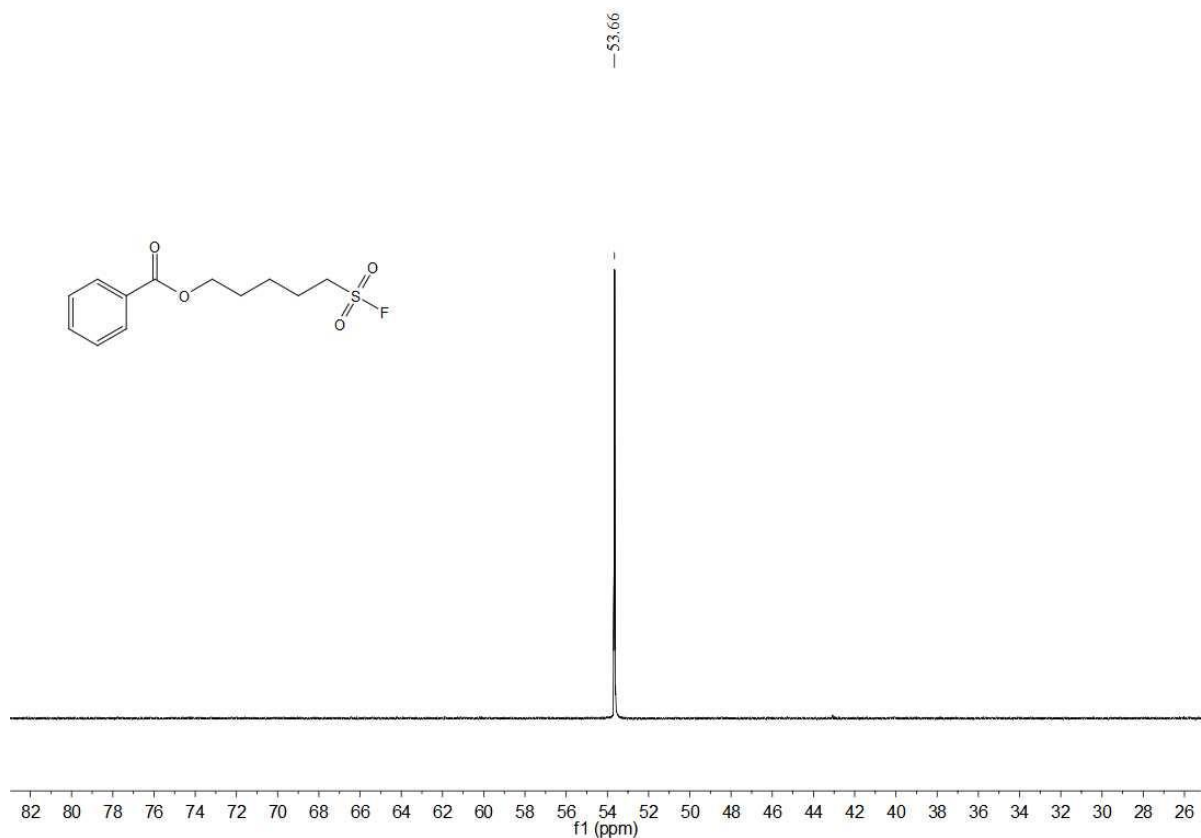

## 5-(fluorosulfonyl)pentyl [1,1'-biphenyl]-4-carboxylate (4h)

### <sup>1</sup>H NMR

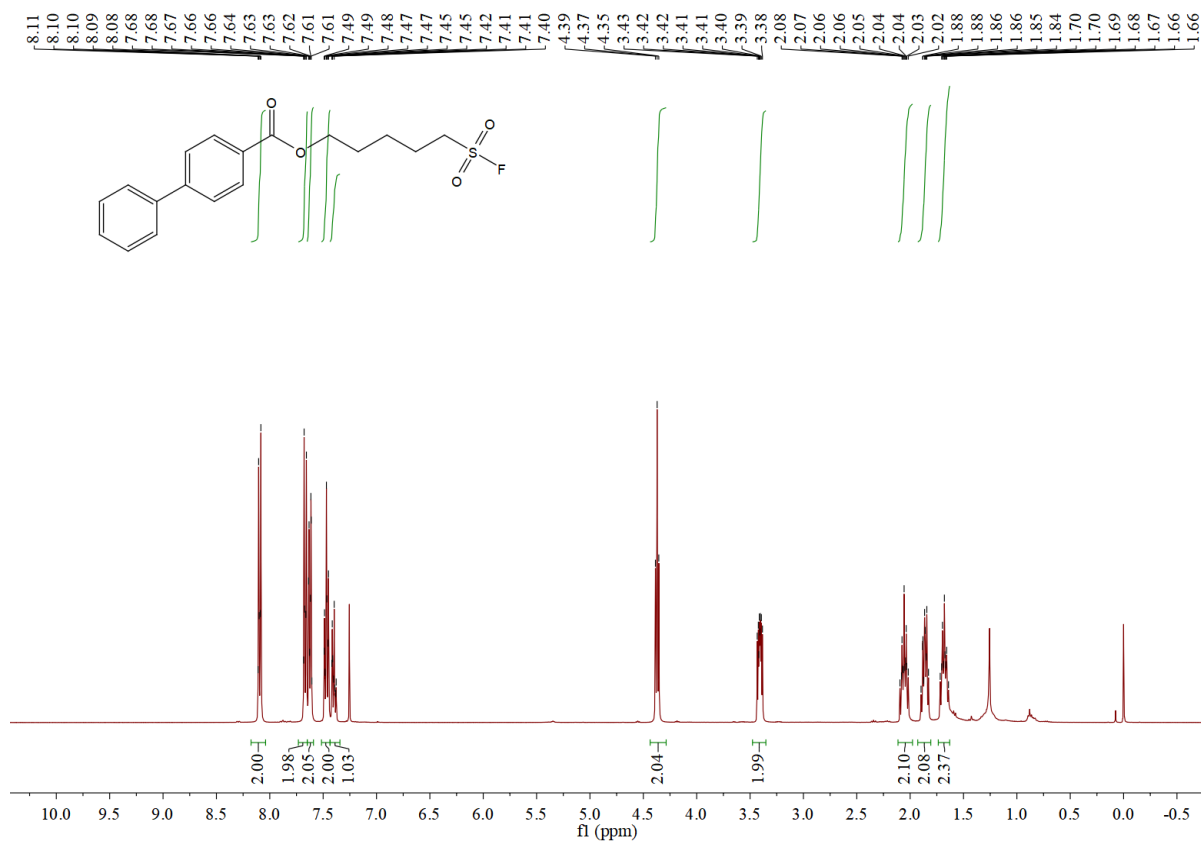

# <sup>13</sup>C NMR

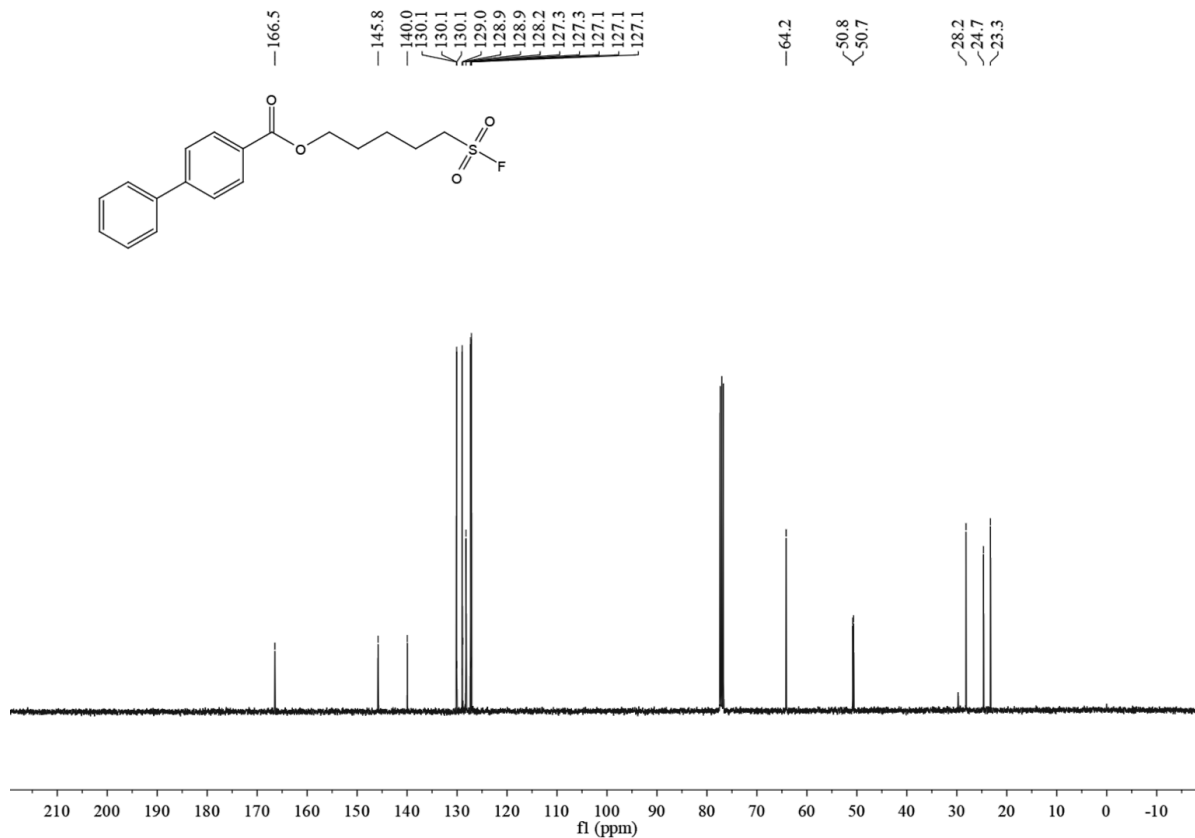

# <sup>19</sup>F NMR

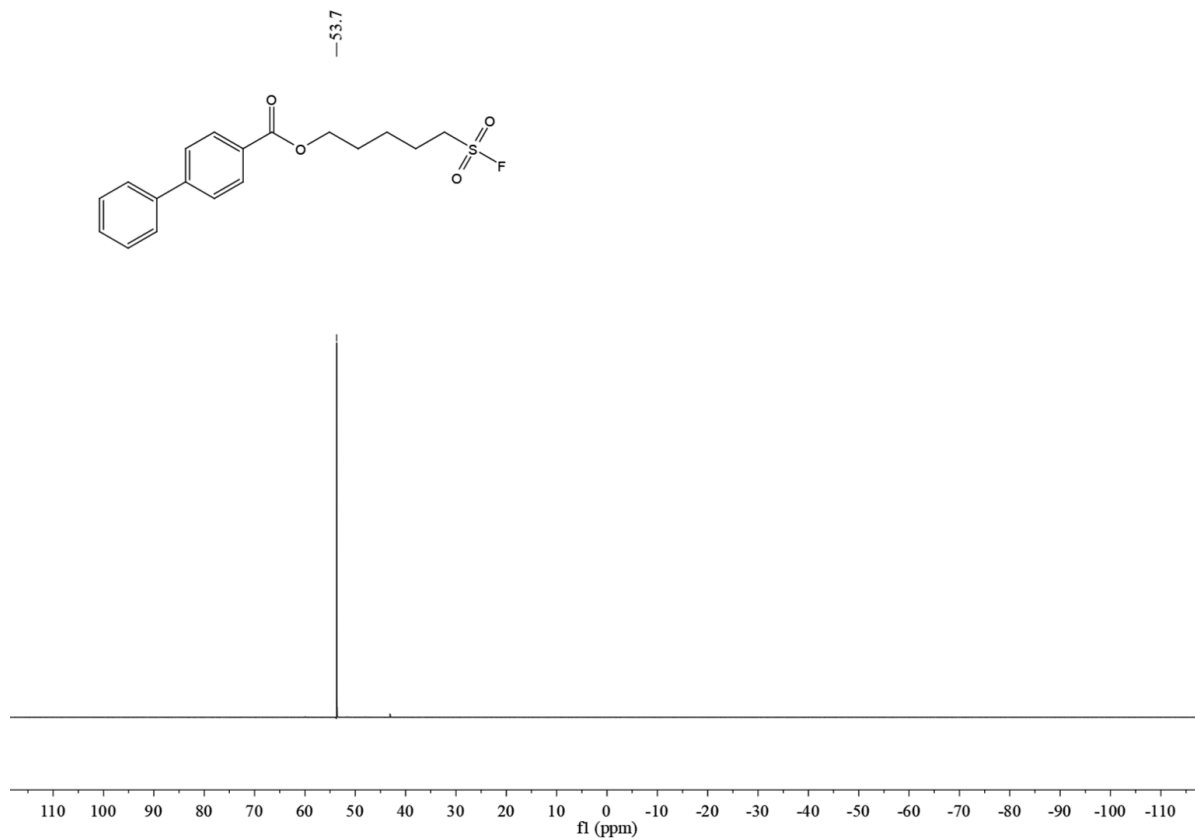

# 5-(fluorosulfonyl)pentyl 4-fluorobenzoate (2i)

## <sup>1</sup>H NMR

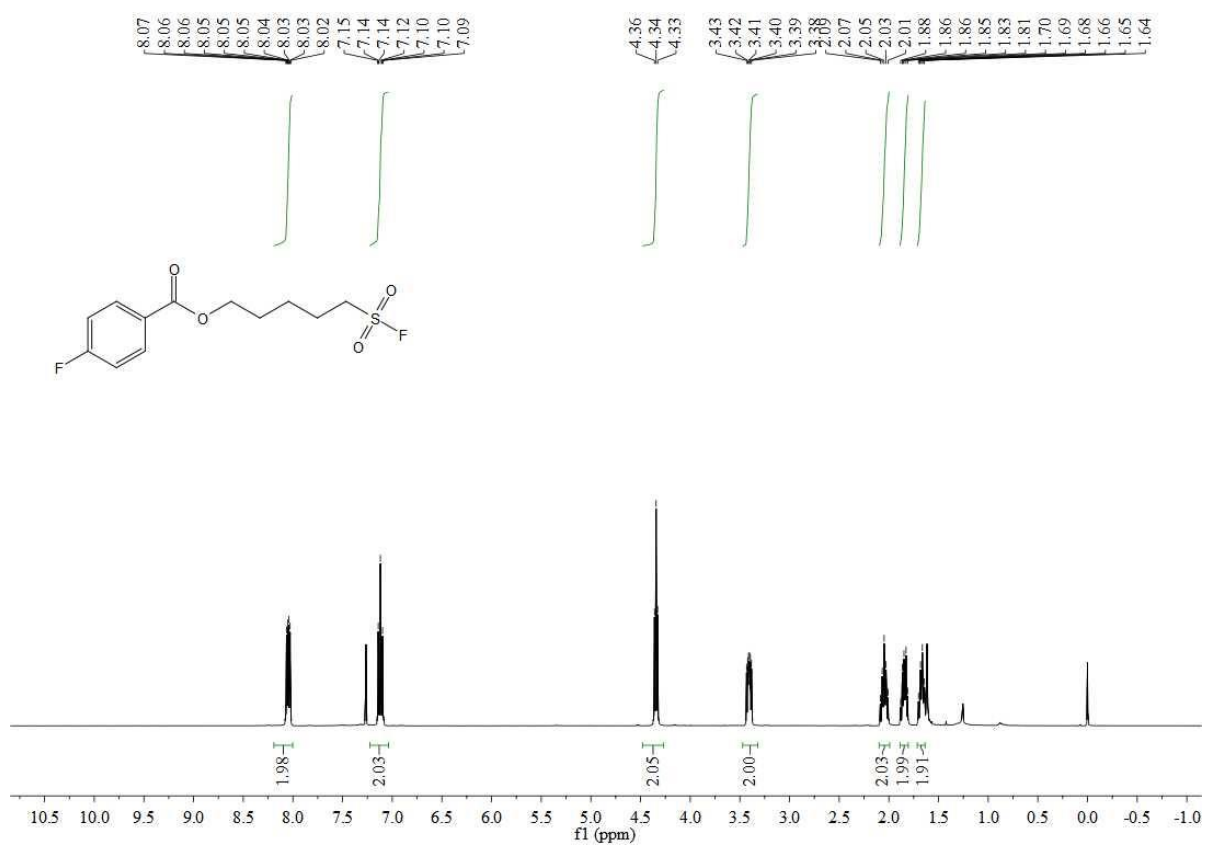

## <sup>13</sup>C NMR

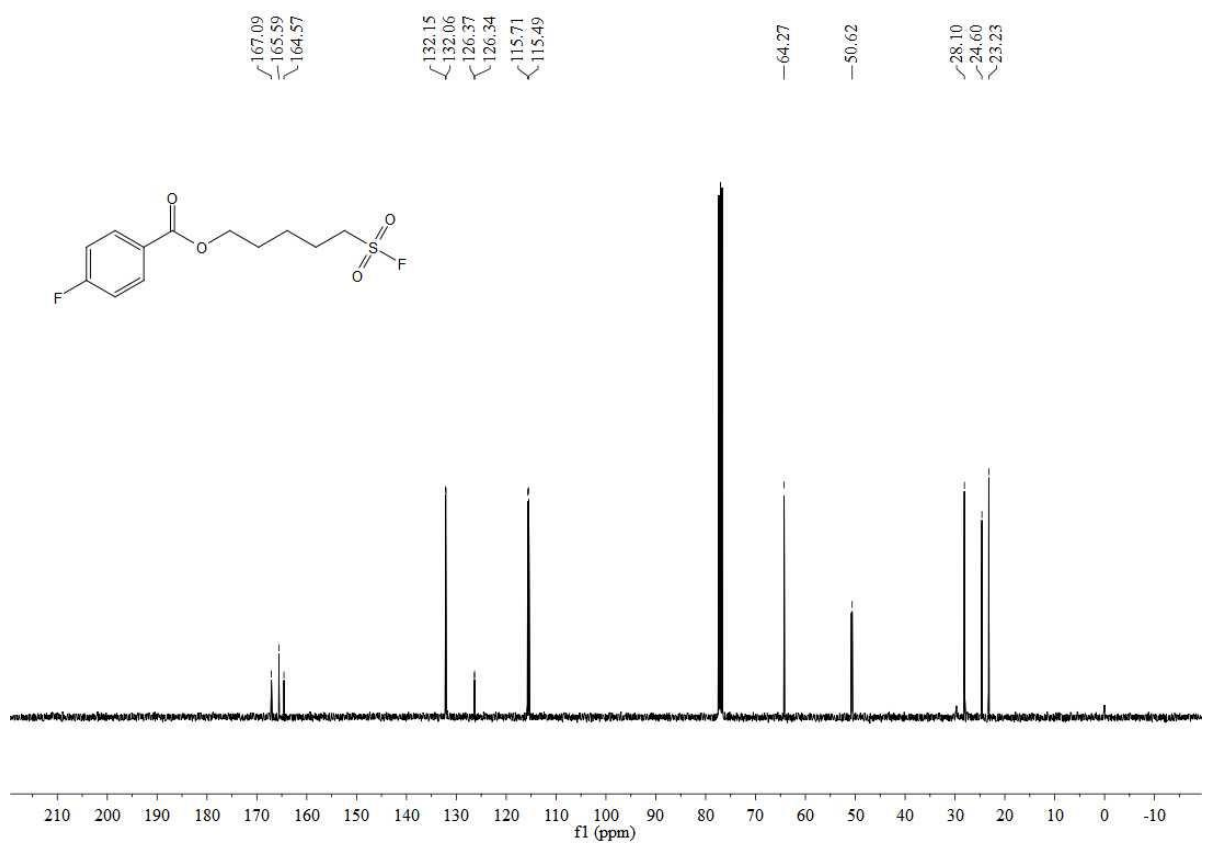

# <sup>19</sup>F NMR

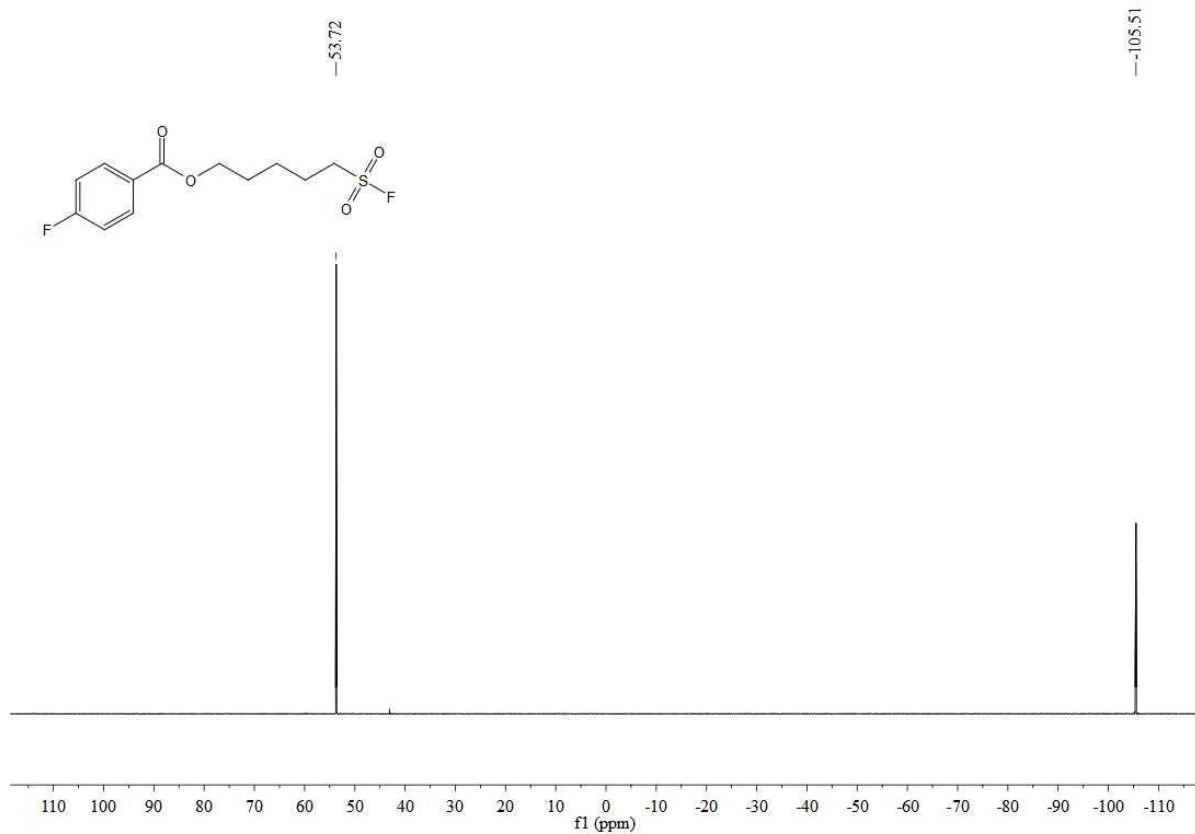

## 5-(fluorosulfonyl)pentyl 4-chlorobenzoate (**4j**)

### <sup>1</sup>H NMR

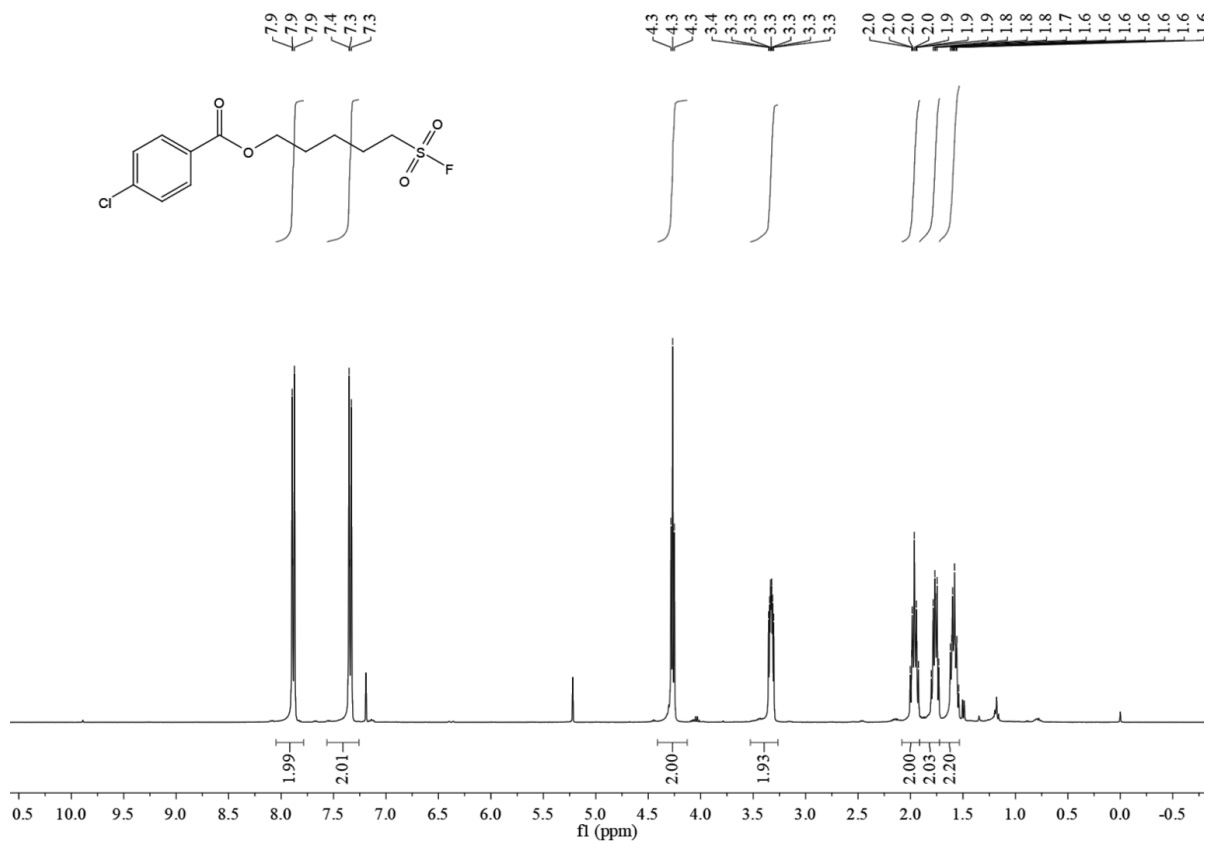

# <sup>13</sup>C NMR

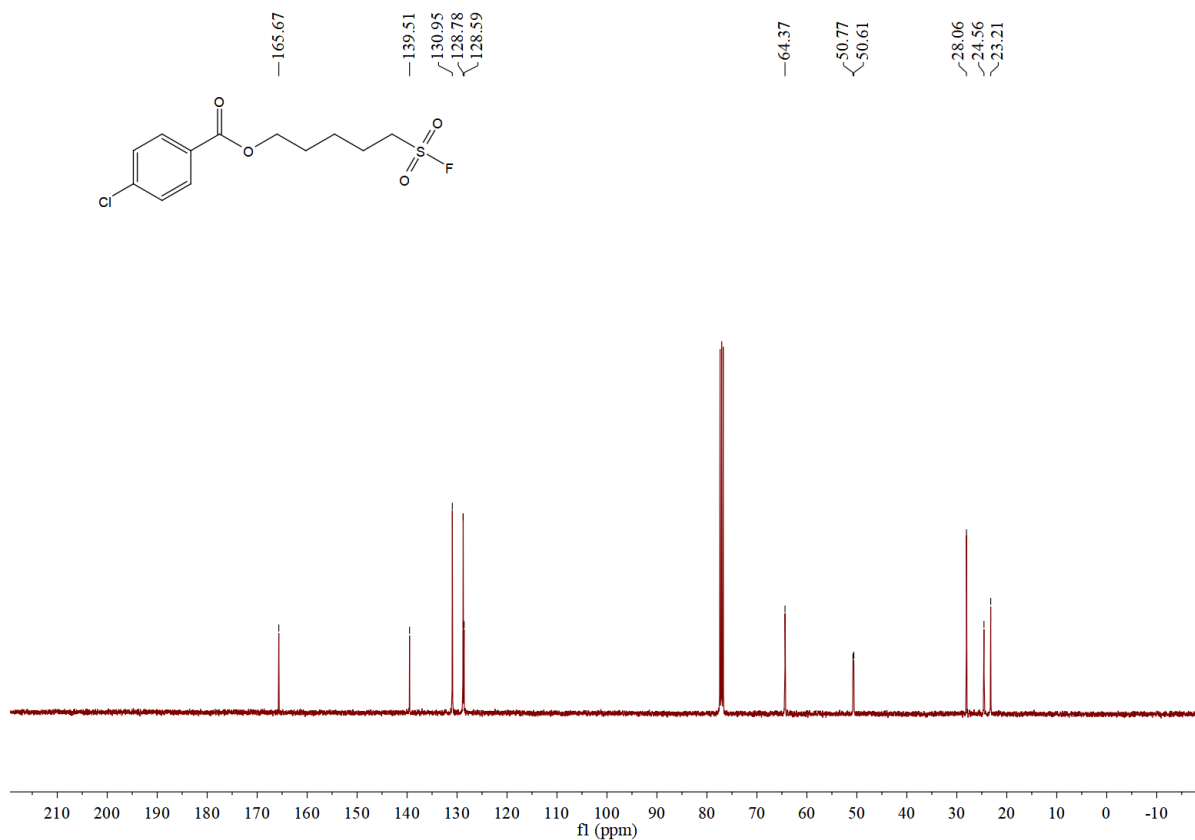

# <sup>19</sup>F NMR

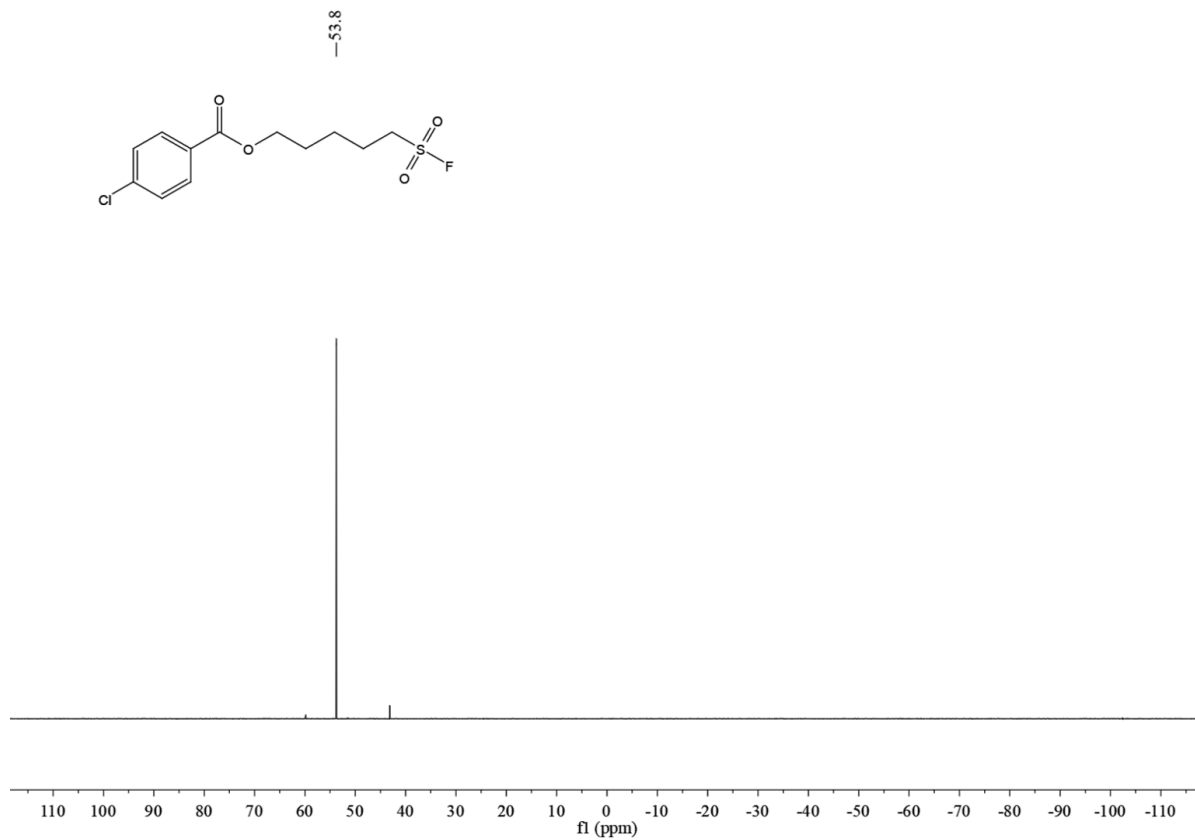

5-(fluorosulfonyl)pentyl 4-bromobenzoate (**4k**)

<sup>1</sup>H NMR

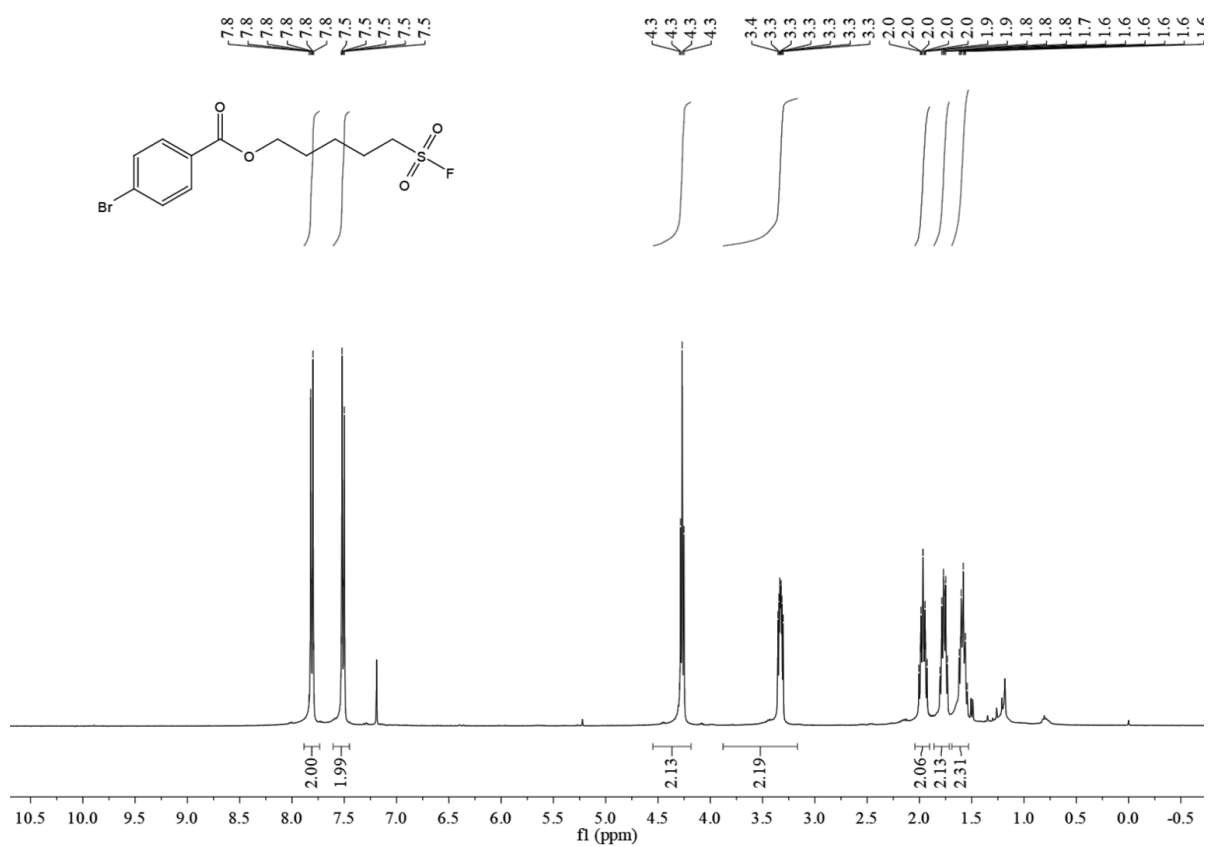

<sup>13</sup>C NMR

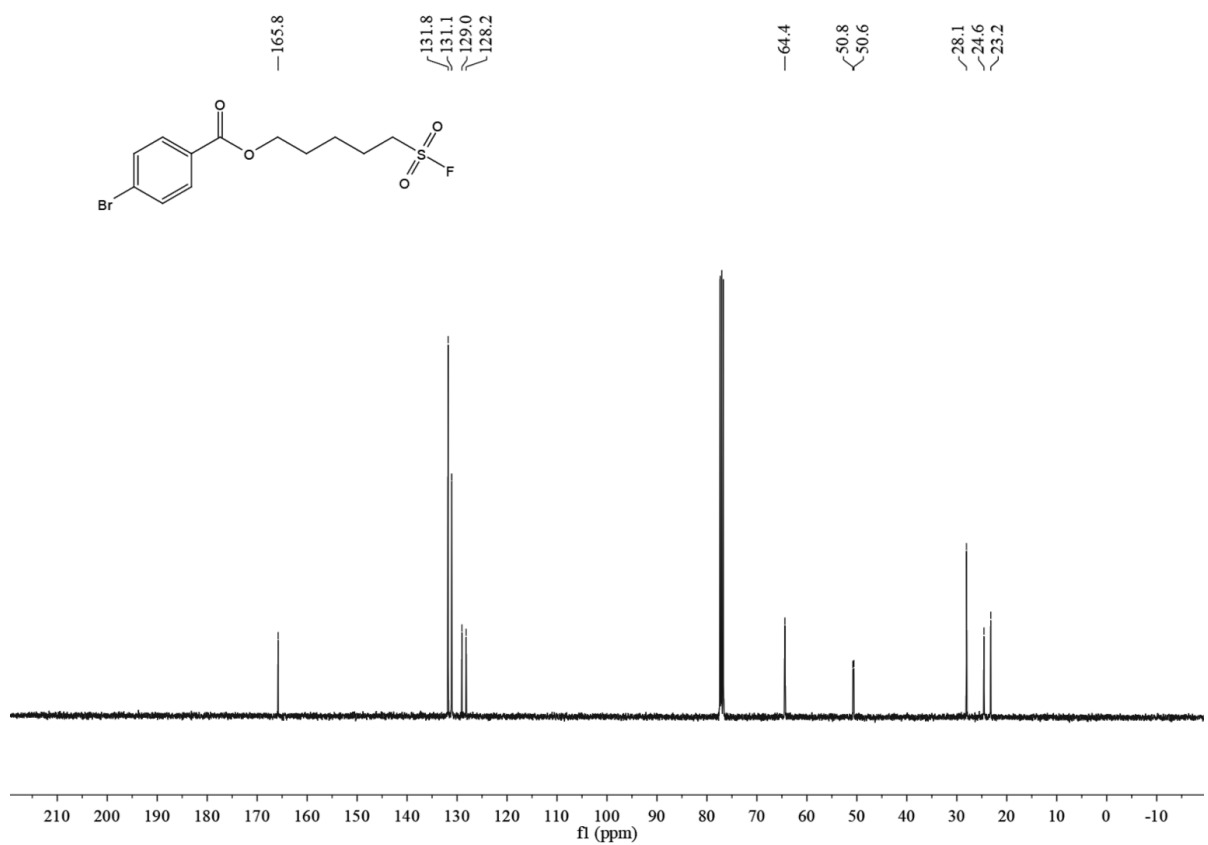

# <sup>19</sup>F NMR

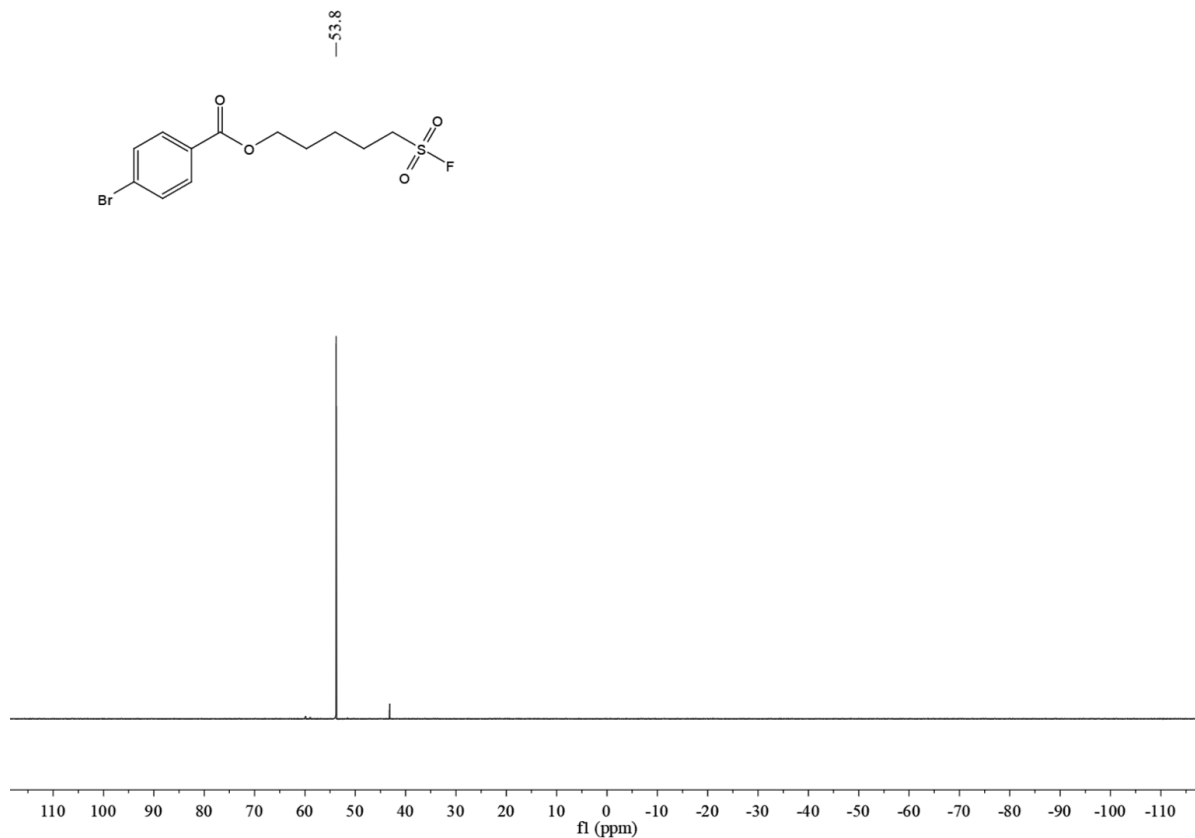

## 5-(fluorosulfonyl)pentyl 4-iodobenzoate (**4l**)

### <sup>1</sup>H NMR

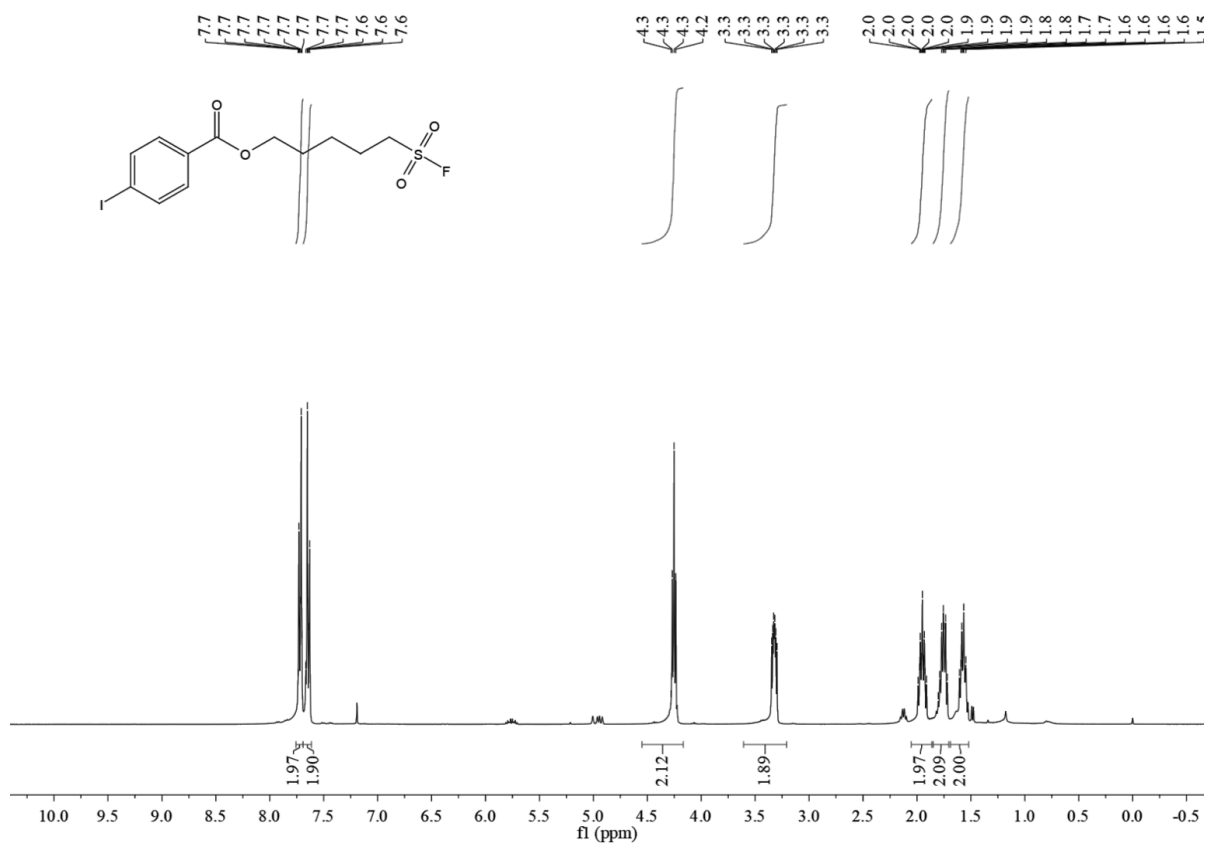



### <sup>13</sup>C NMR

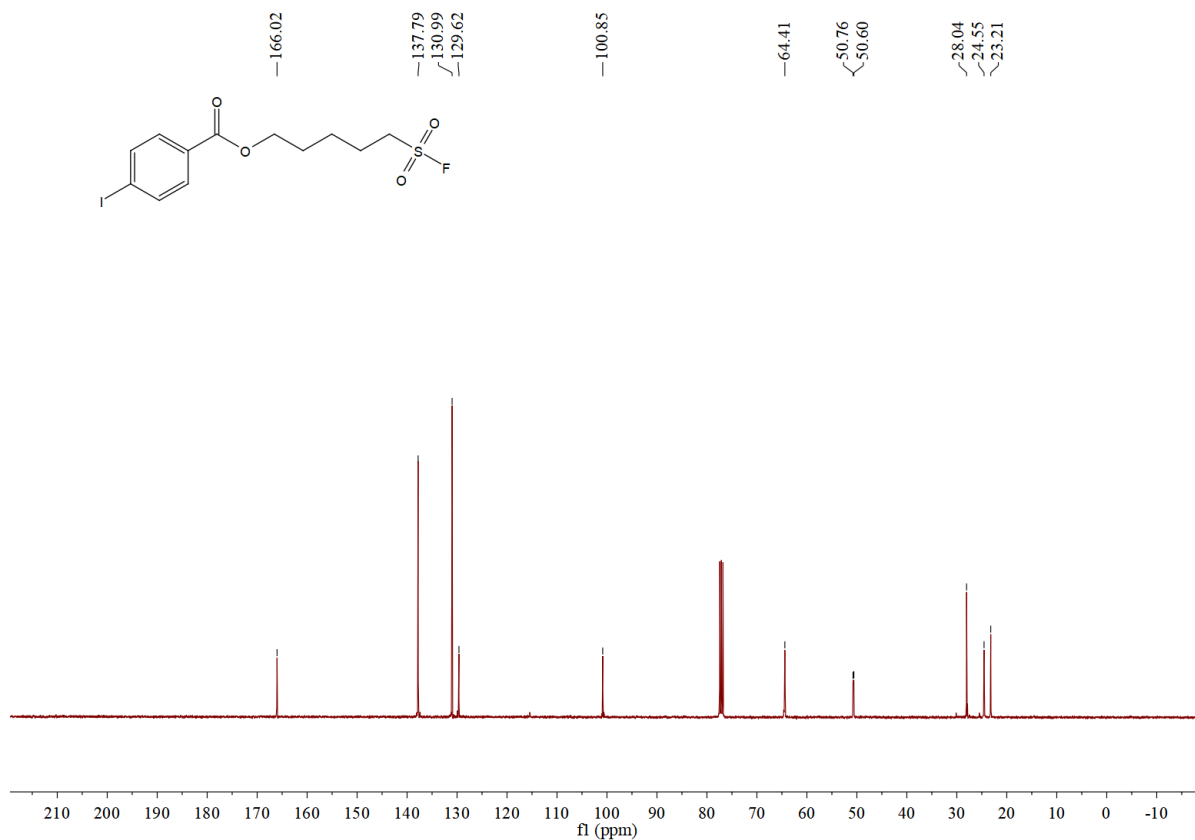

### <sup>19</sup>F NMR

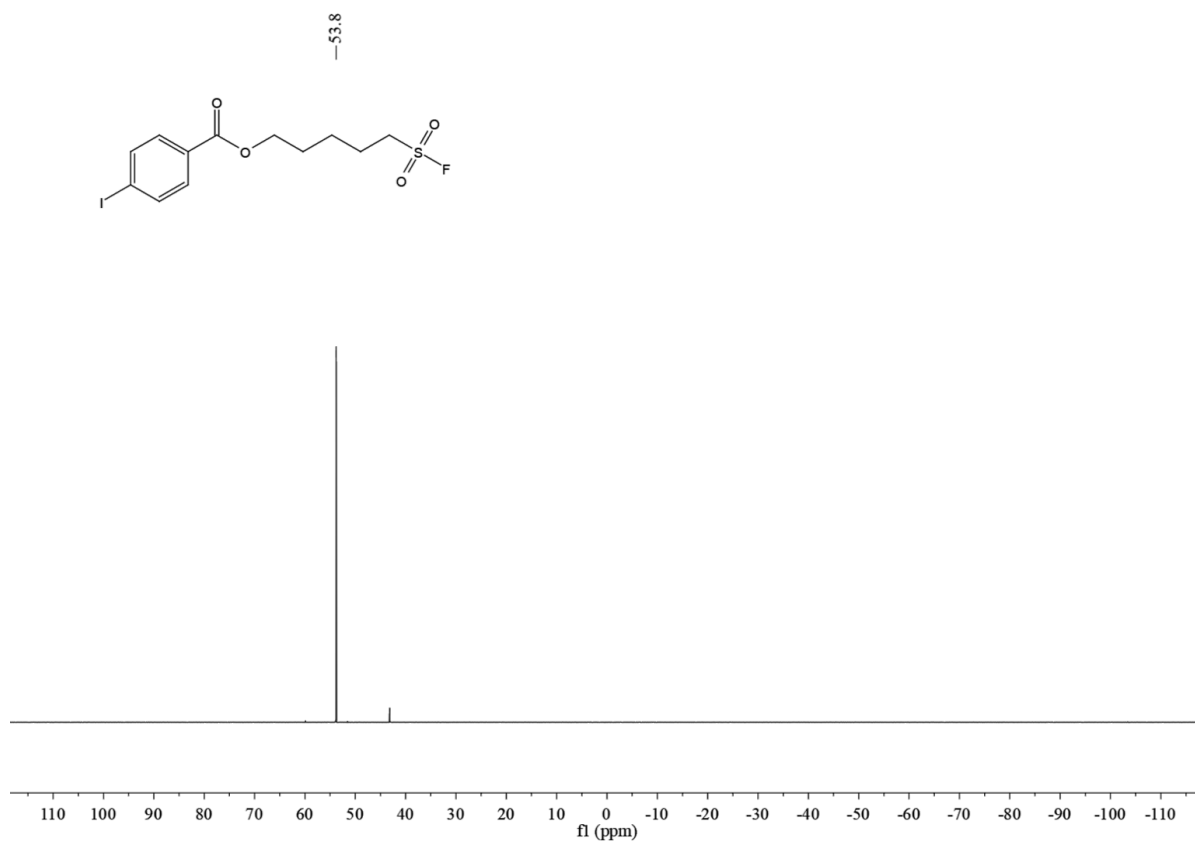

5-(trifluoromethyl)pentyl 4-(trifluoromethyl)benzoate (4m)

<sup>1</sup>H NMR

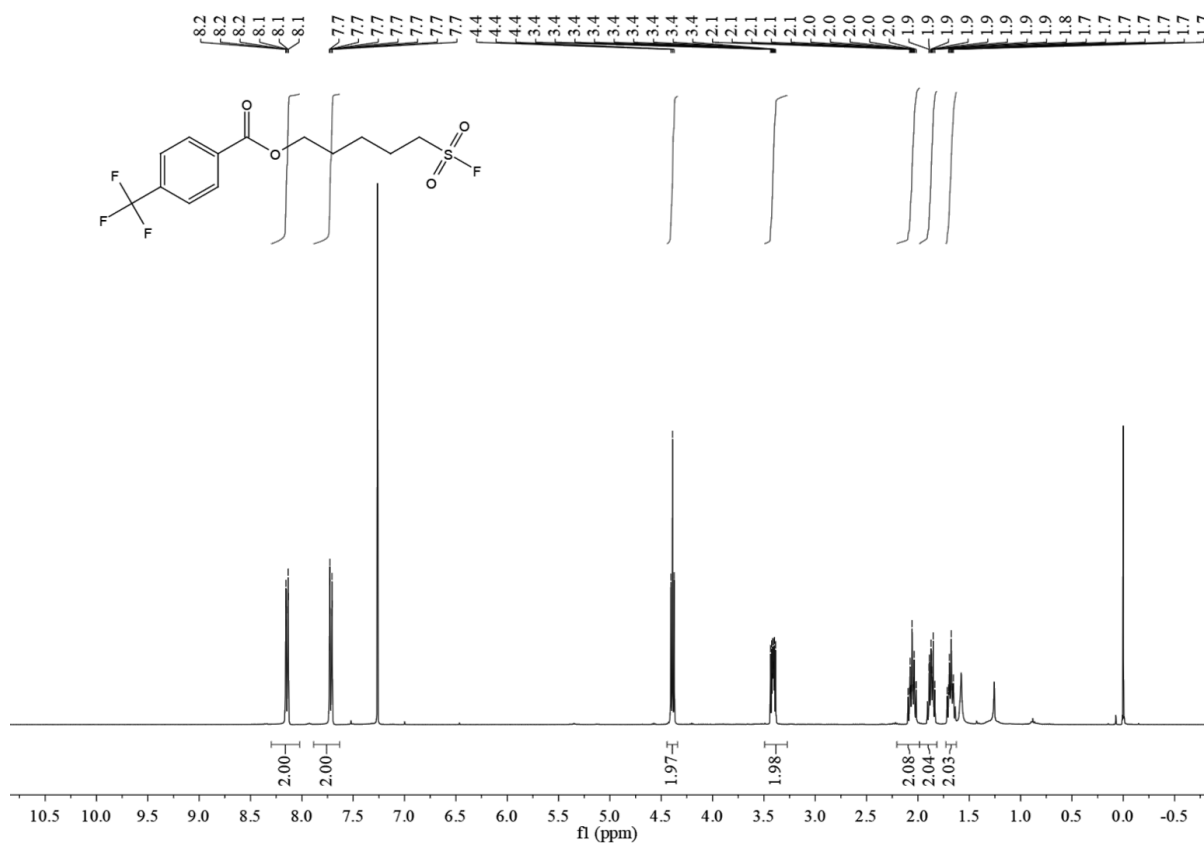

<sup>13</sup>C NMR

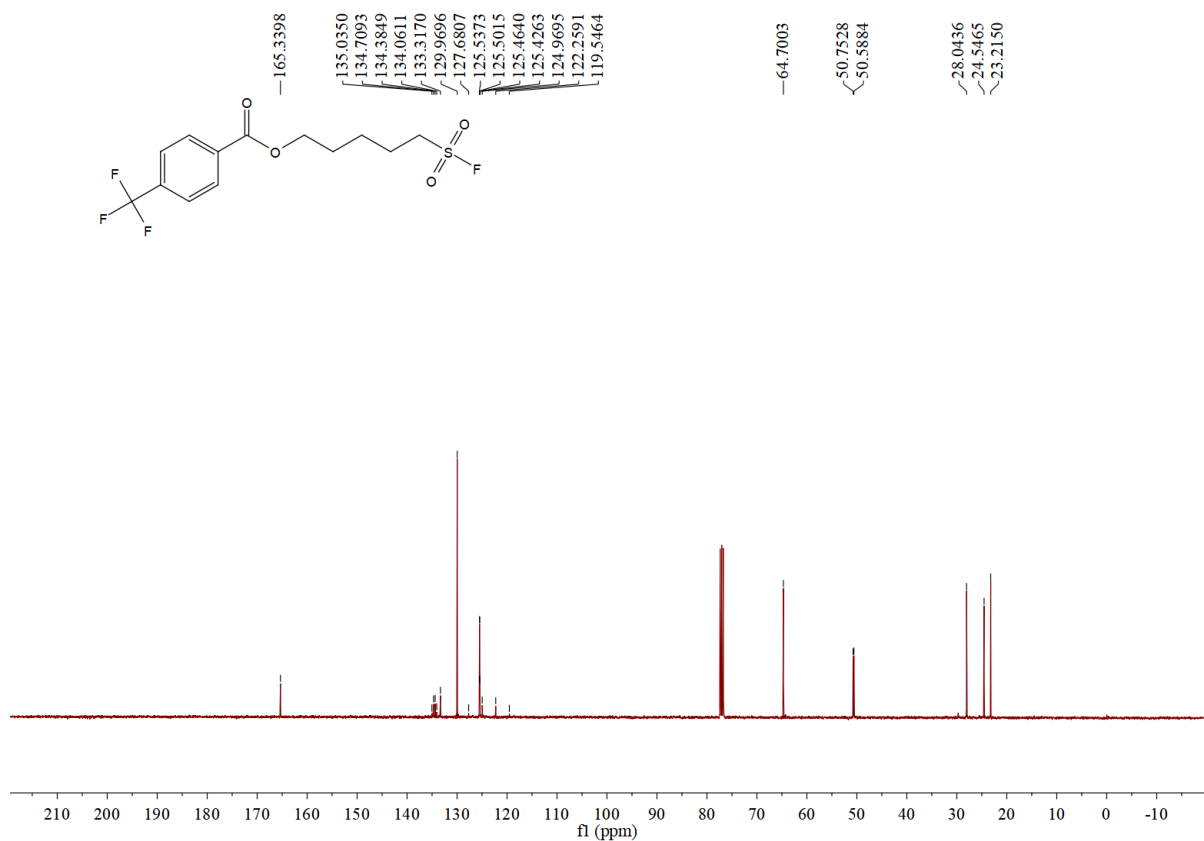

# <sup>19</sup>F NMR

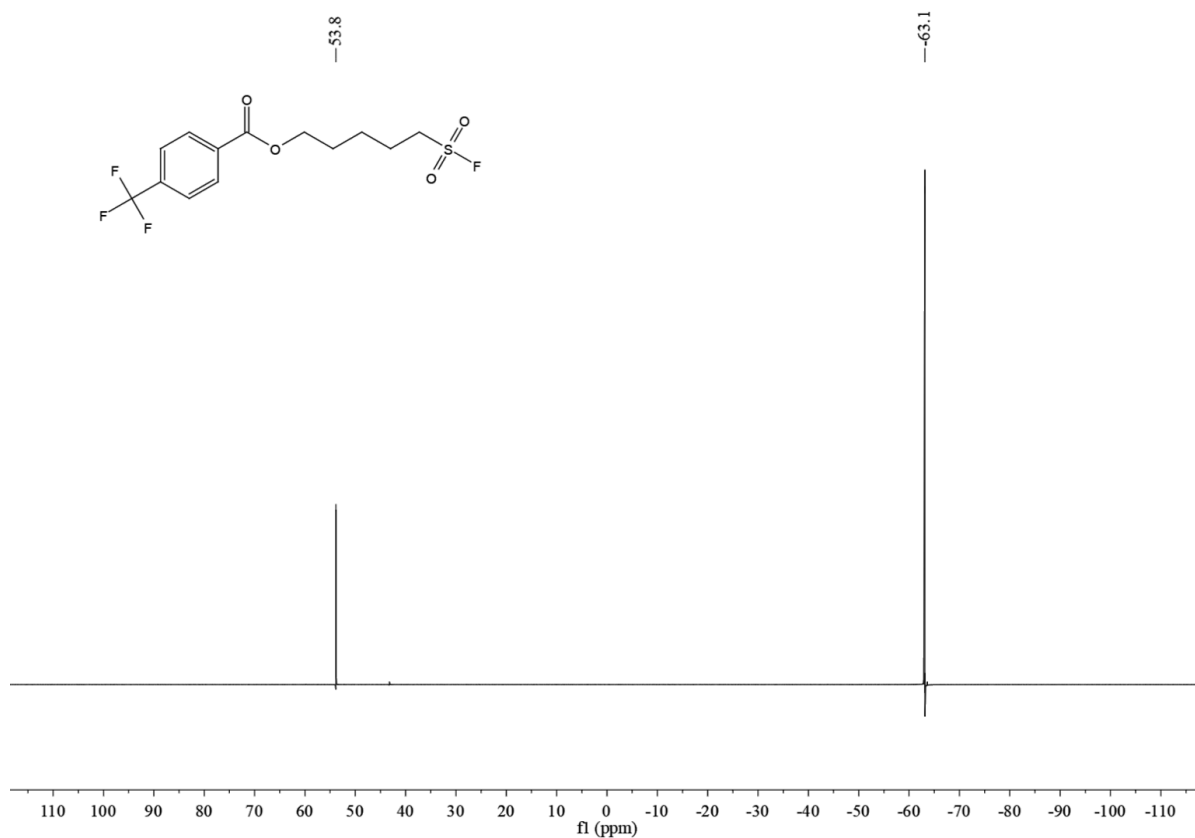

# 5-(fluorosulfonyl)pentyl 4-cyanobenzoate (**4n**)

## <sup>1</sup>H NMR

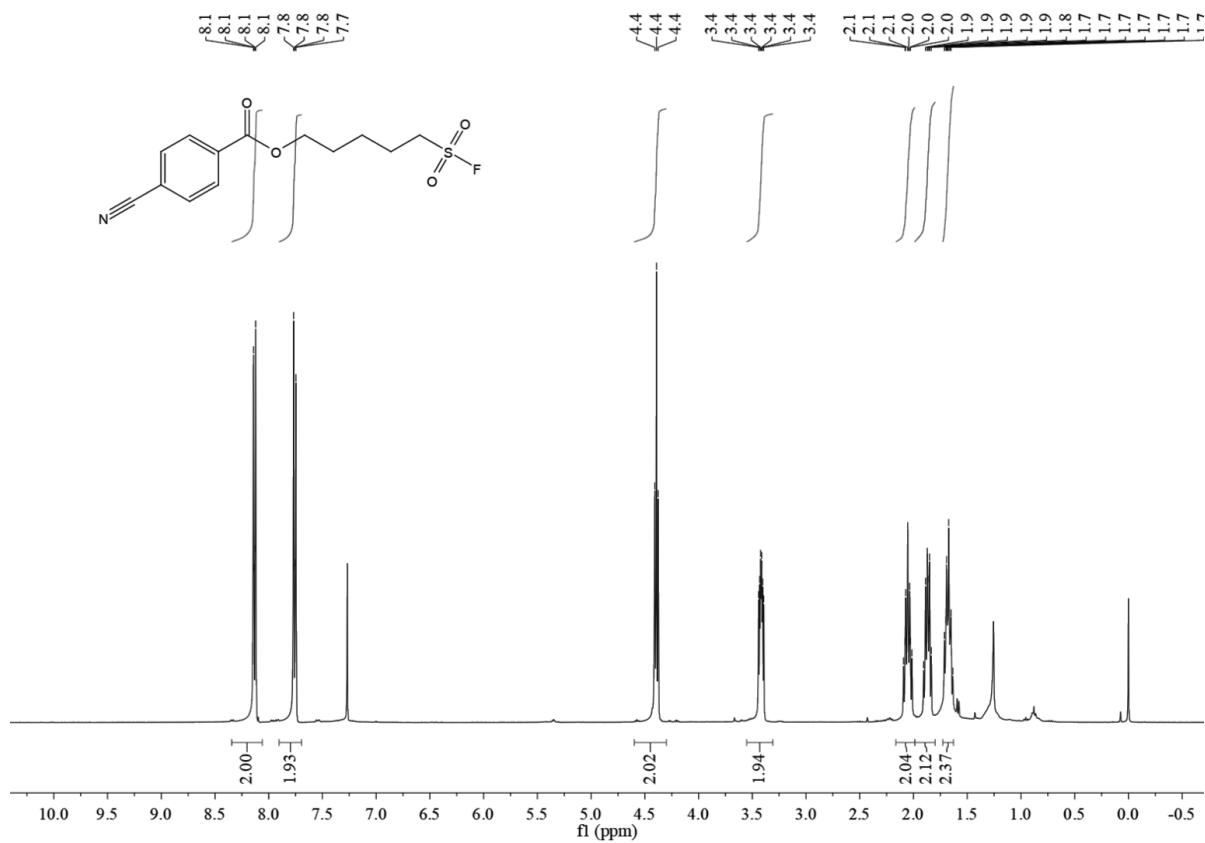

# <sup>13</sup>C NMR

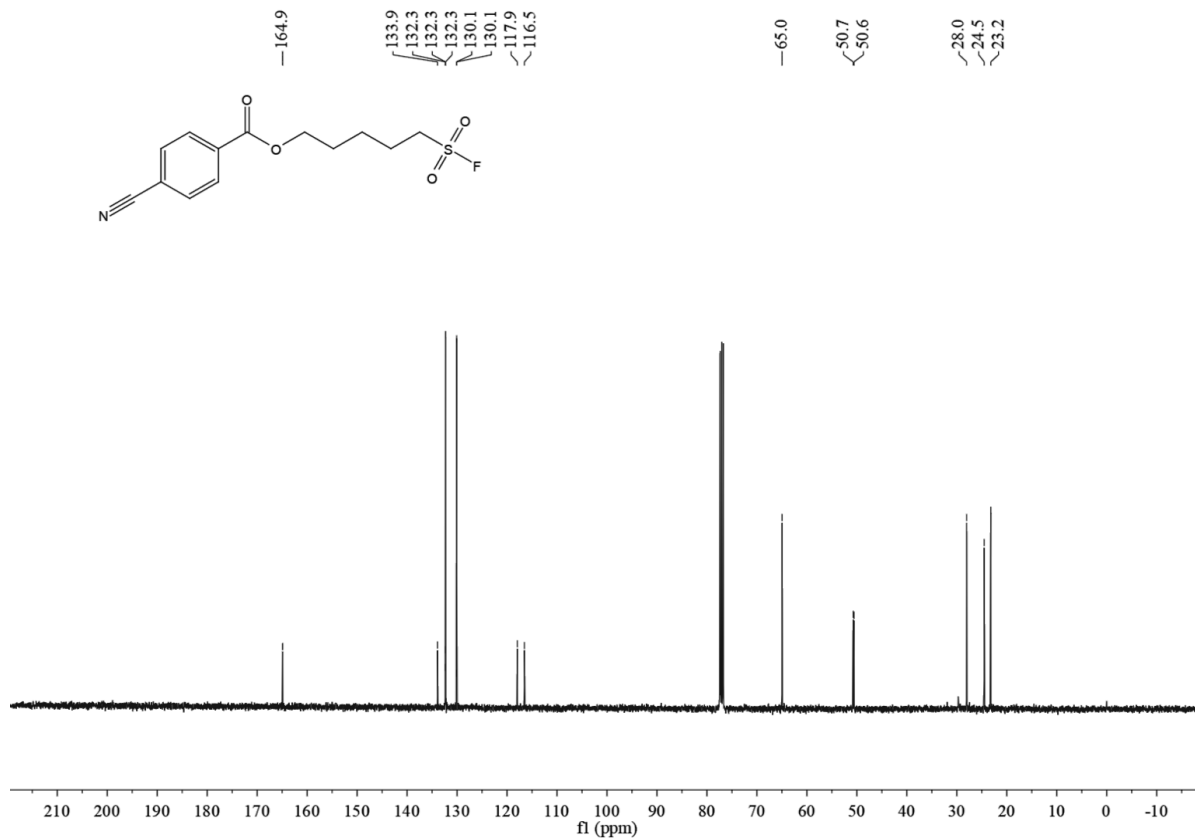

# <sup>19</sup>F NMR

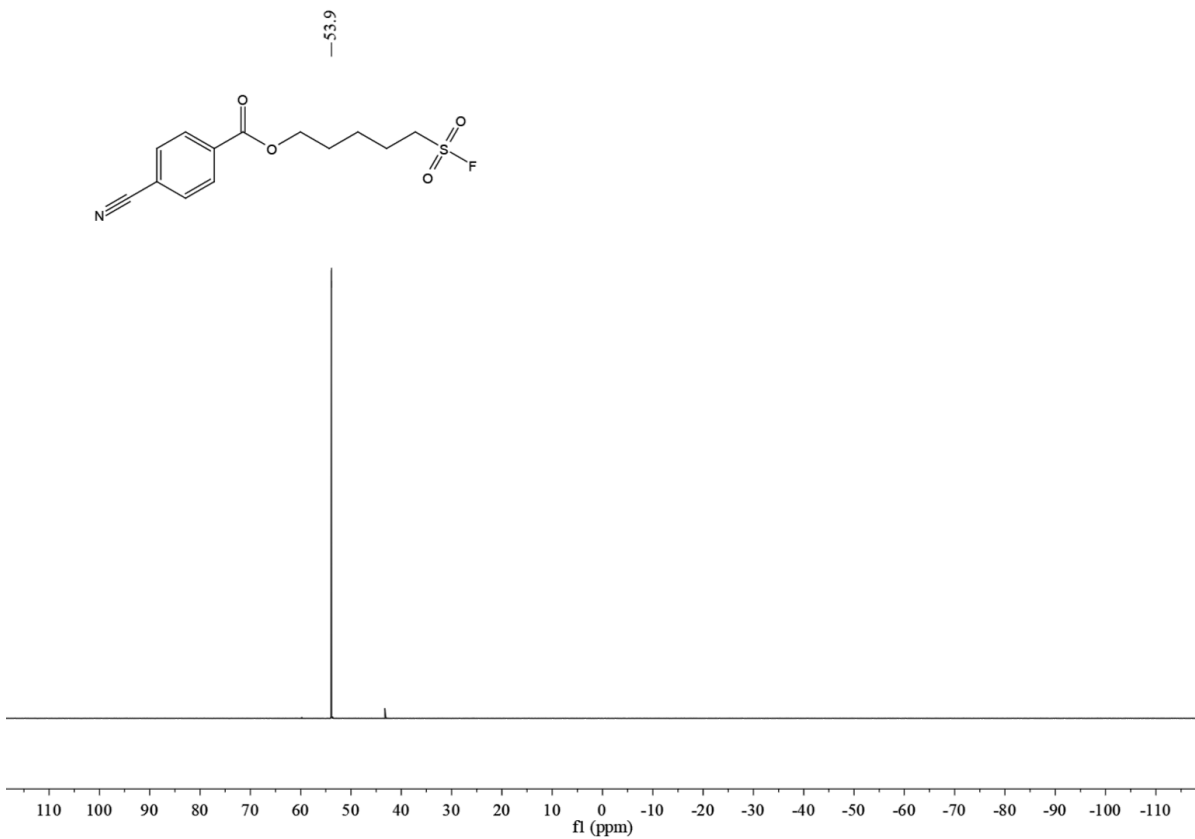

# 5-(fluorosulfonyl)pentyl 4-formylbenzoate (4o)

## <sup>1</sup>H NMR

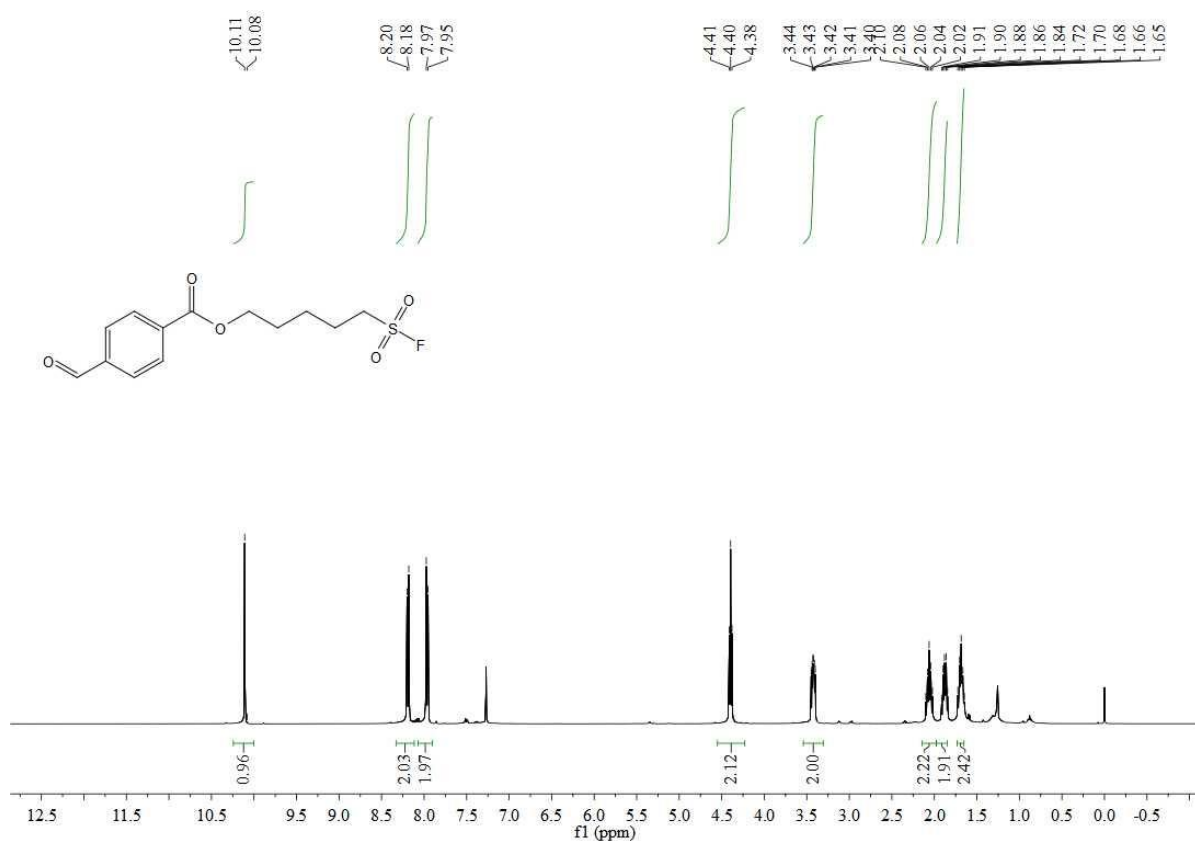

## <sup>13</sup>C NMR

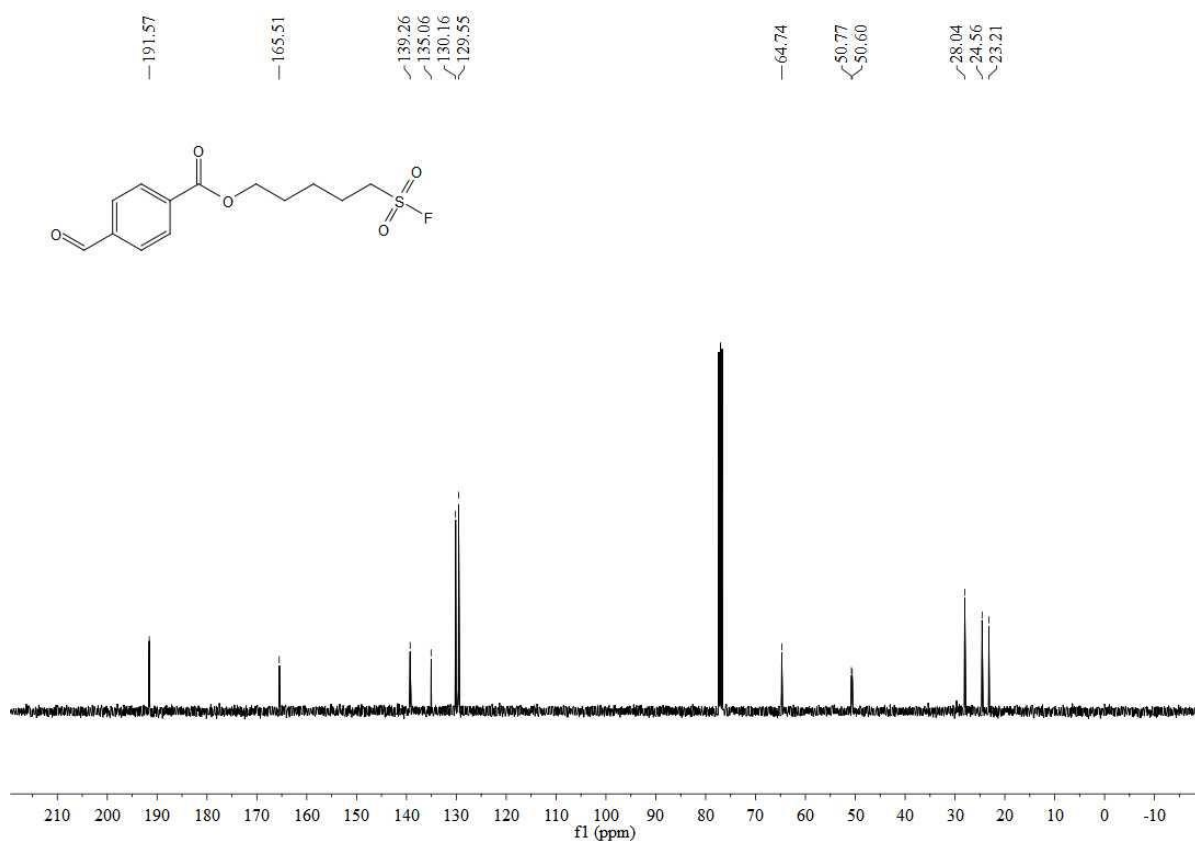

# <sup>19</sup>F NMR

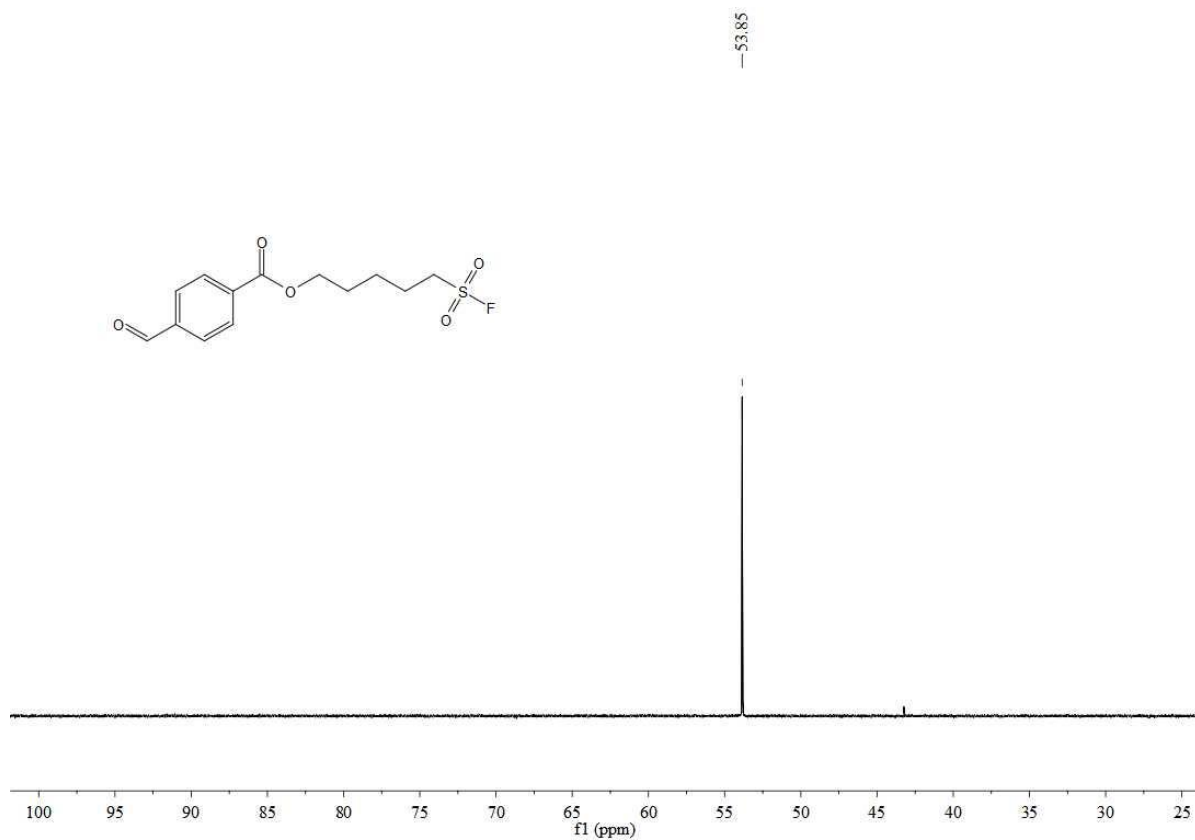

## 5-(fluorosulfonyl)pentyl 2-phenoxyacetate (4p)

### <sup>1</sup>H NMR

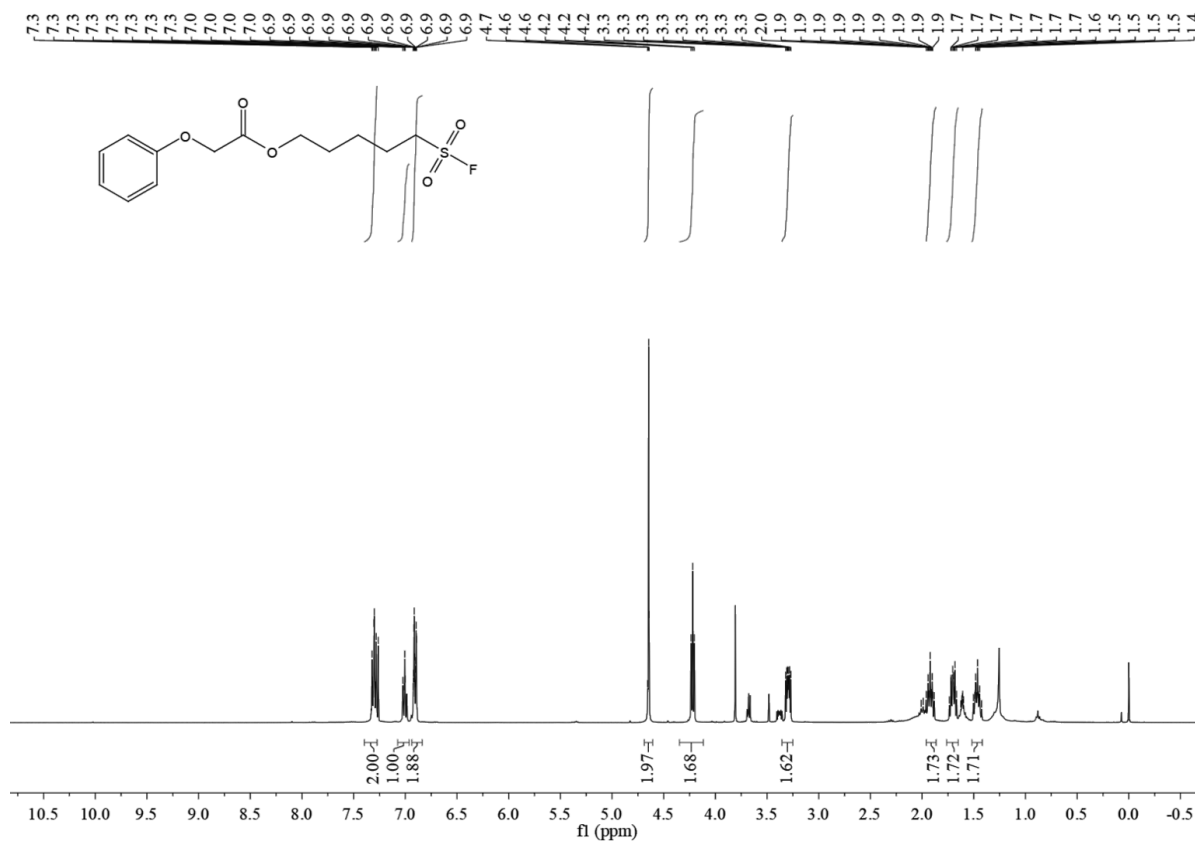

### <sup>13</sup>C NMR

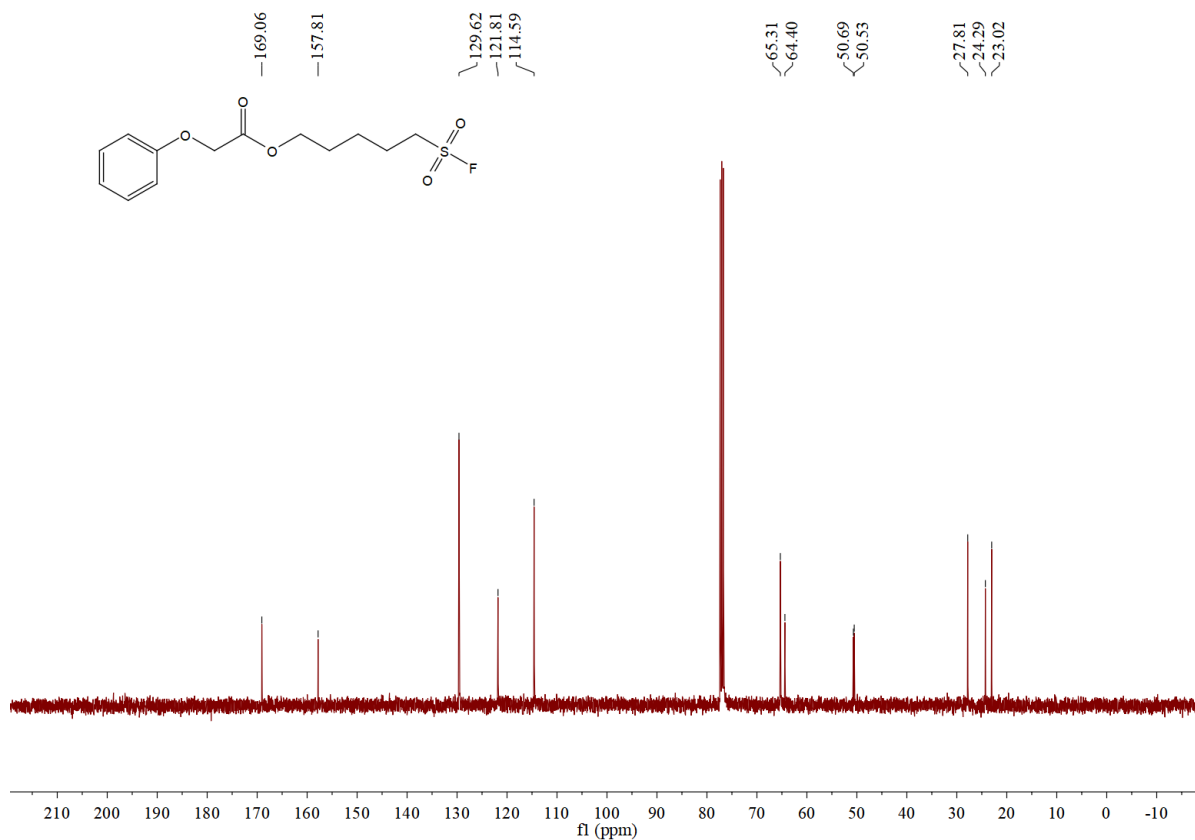

### <sup>19</sup>F NMR

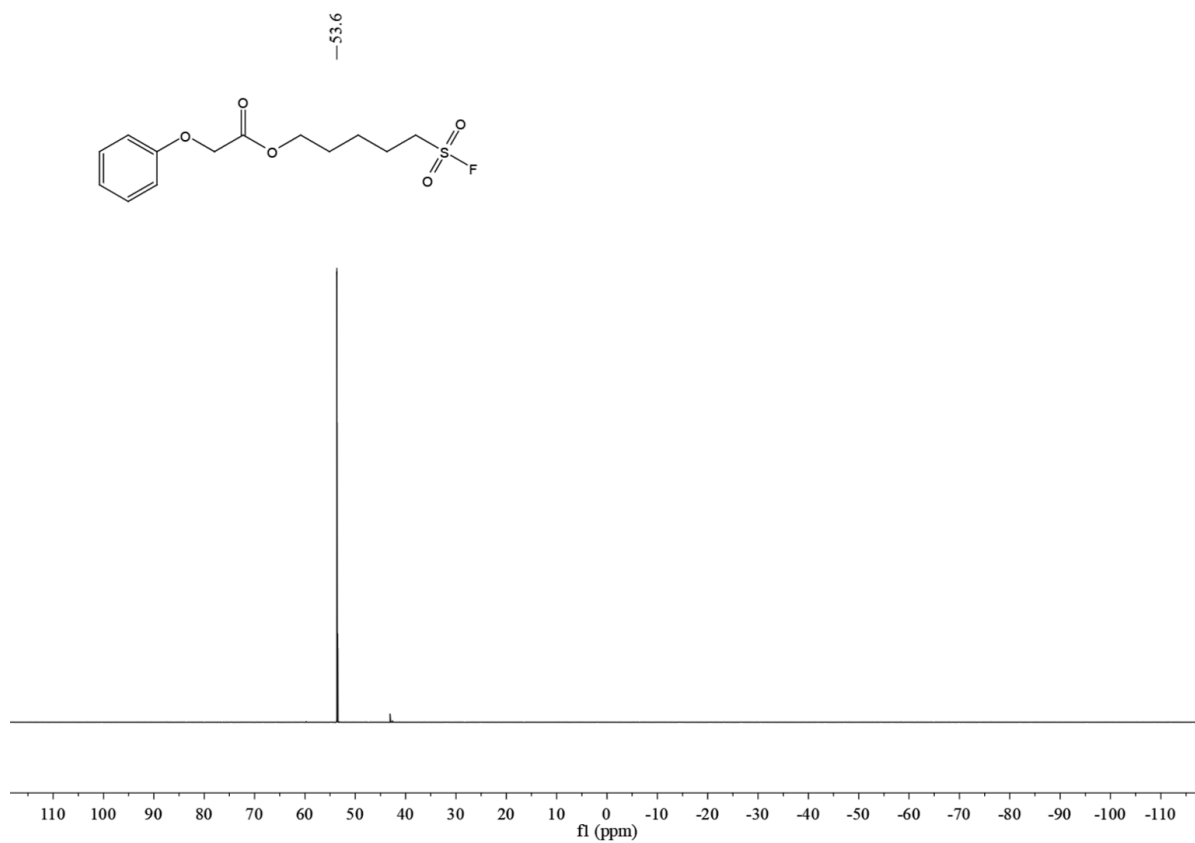

5-(fluorosulfonyl)pentyl 3-phenylpropiolate (**4q**)

<sup>1</sup>H NMR

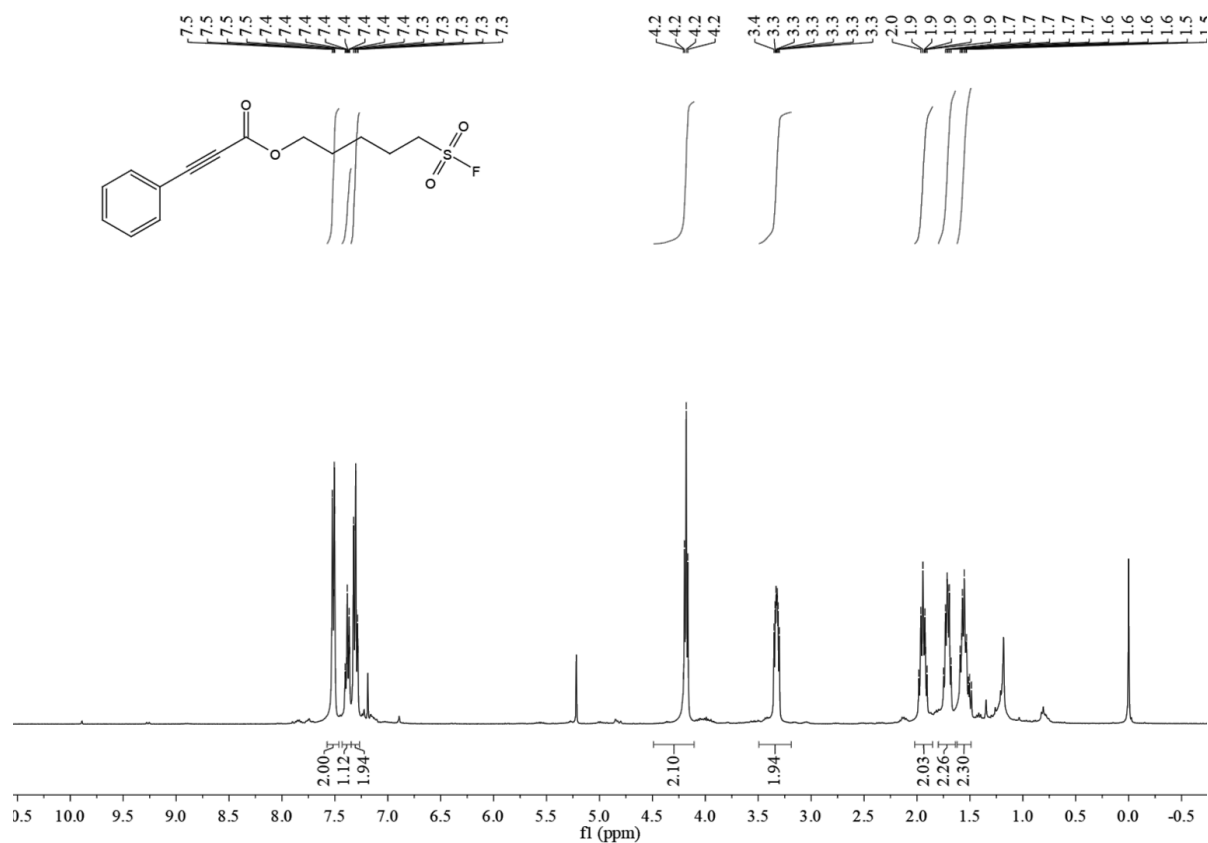

<sup>13</sup>C NMR

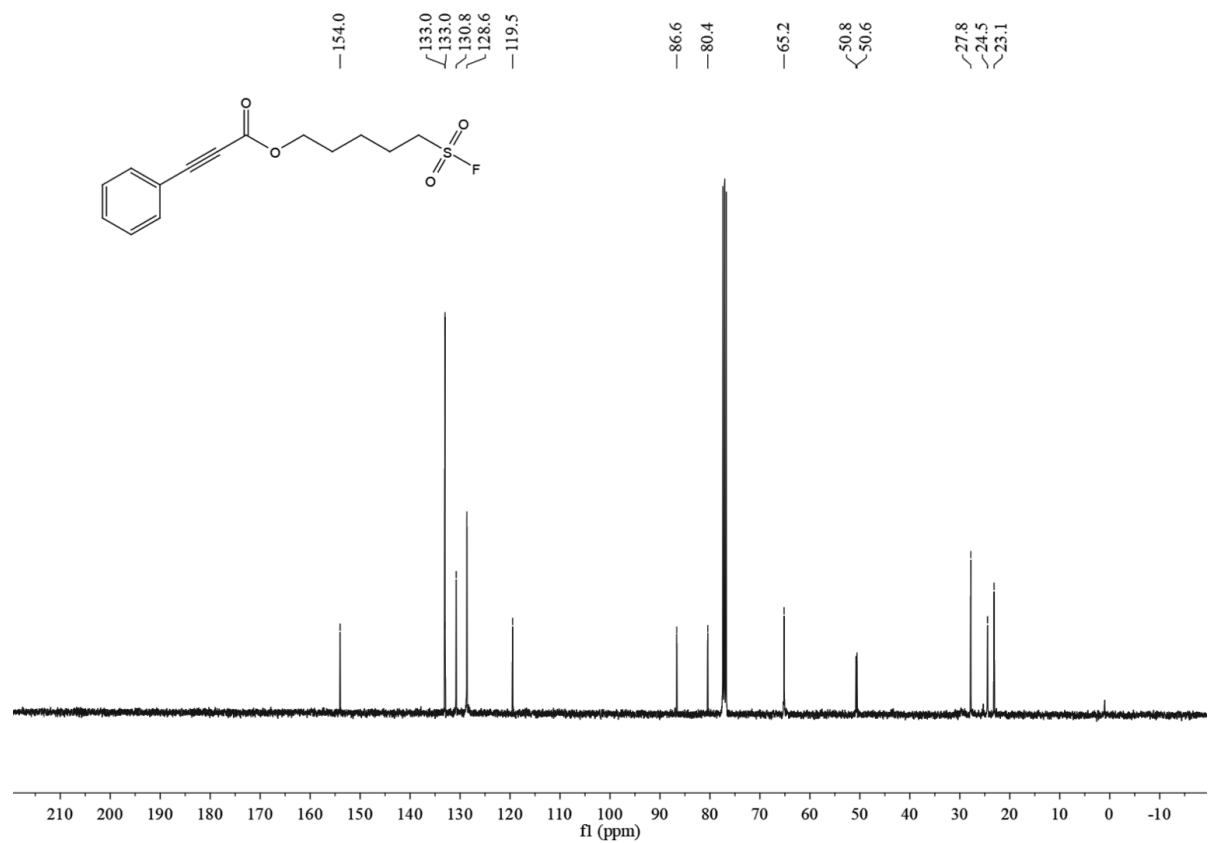



# <sup>19</sup>F NMR

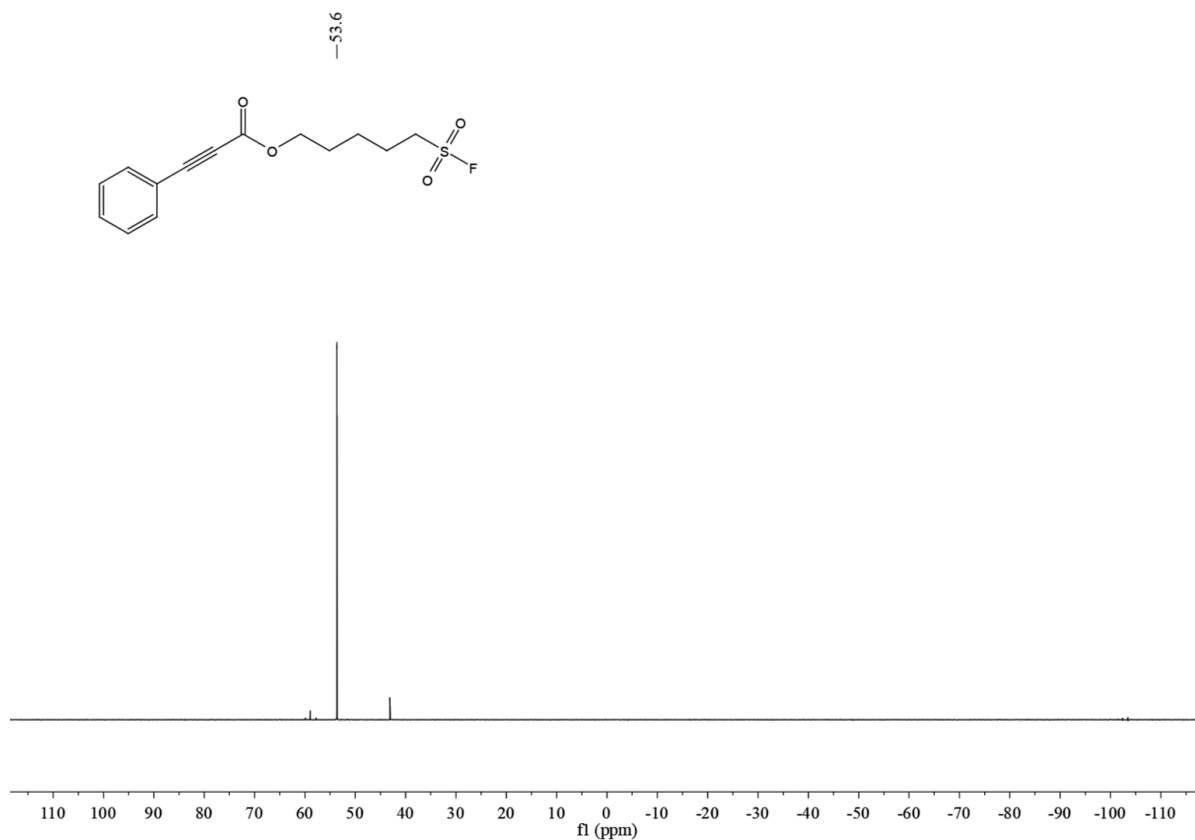

# 5-(fluorosulfonyl)pentyl 2-chloro-3-methylbenzoate (**4r**)

## <sup>1</sup>H NMR

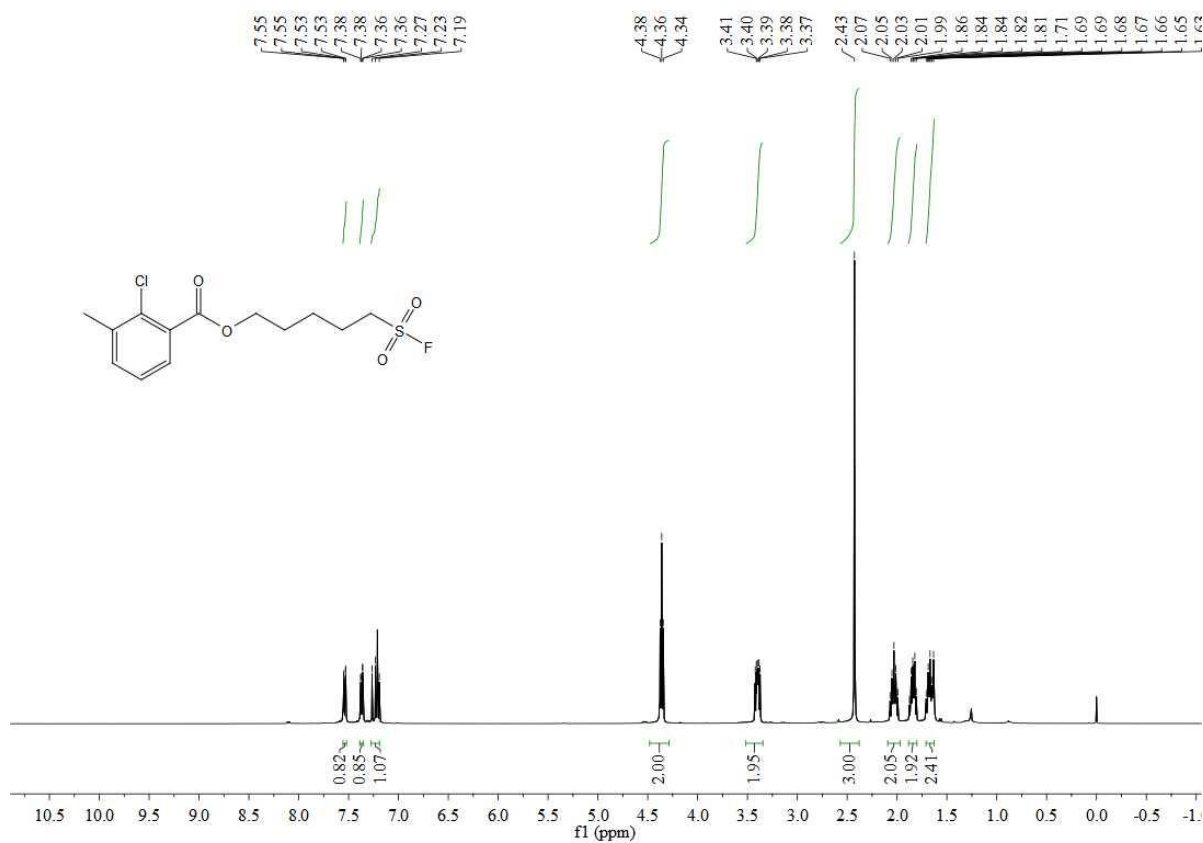

# <sup>13</sup>C NMR

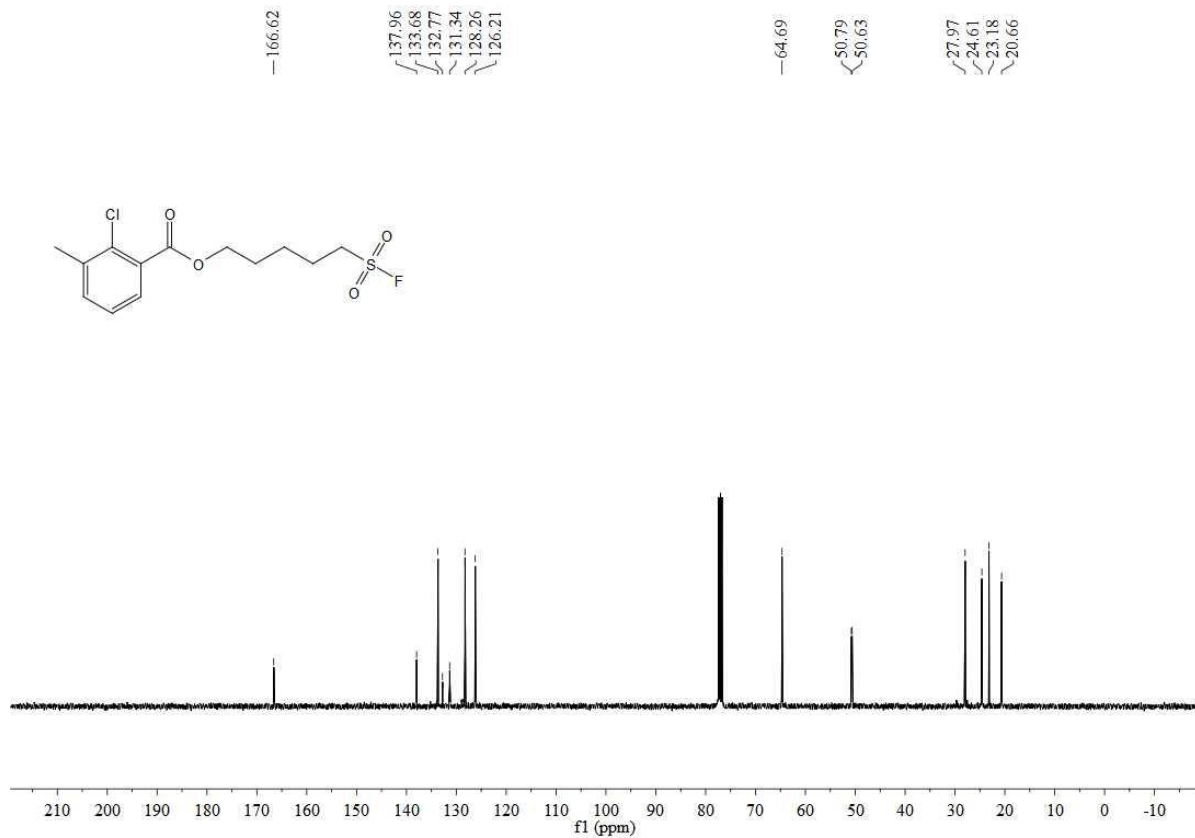

# <sup>19</sup>F NMR

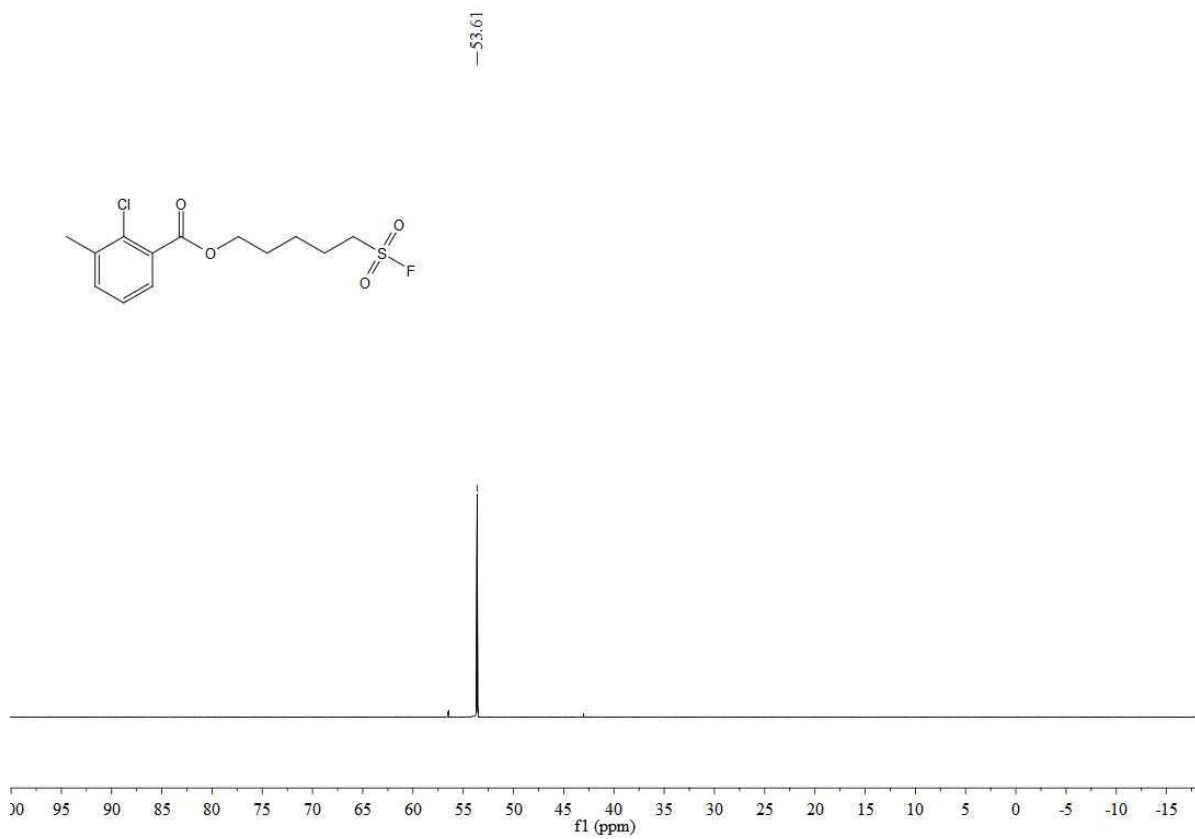

# 5-(fluorosulfonyl)pentyl 2,4,6-trimethoxybenzoate (4s)

## <sup>1</sup>H NMR

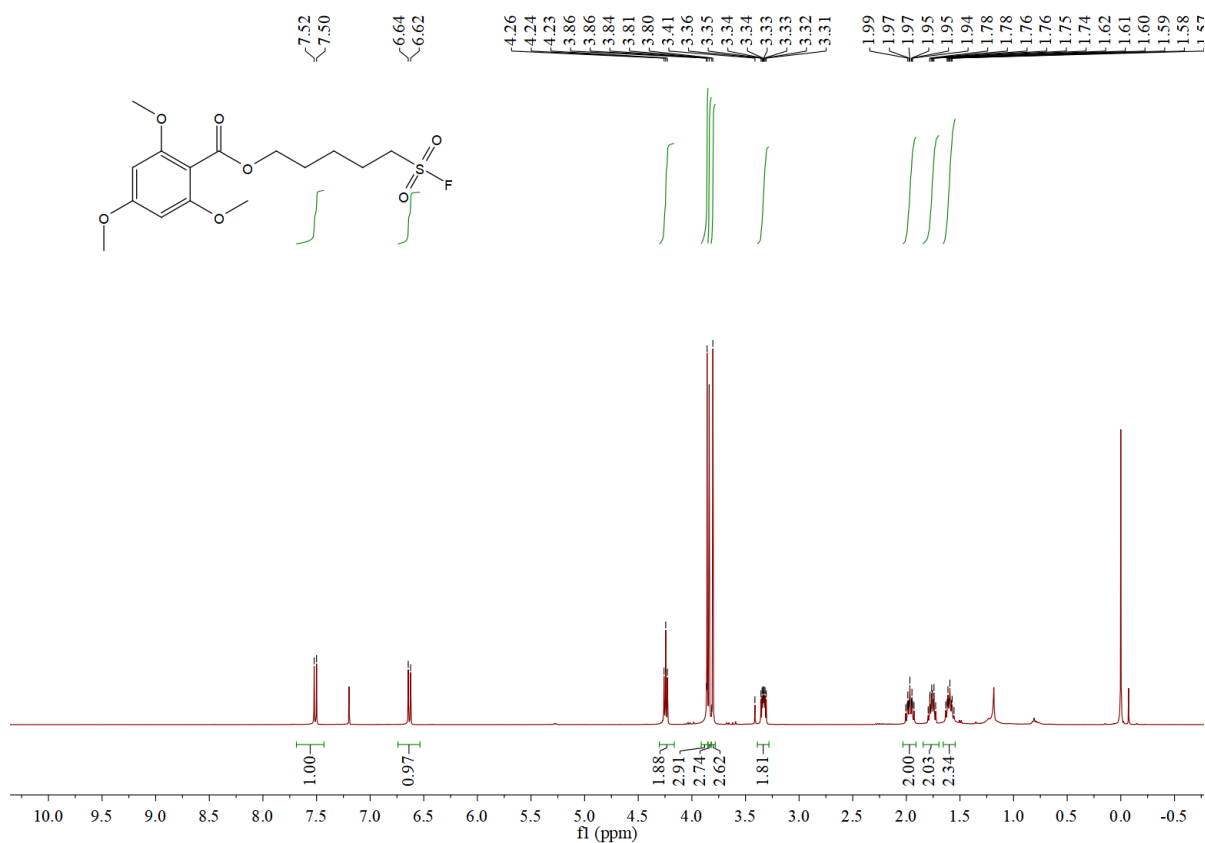

## <sup>13</sup>C NMR

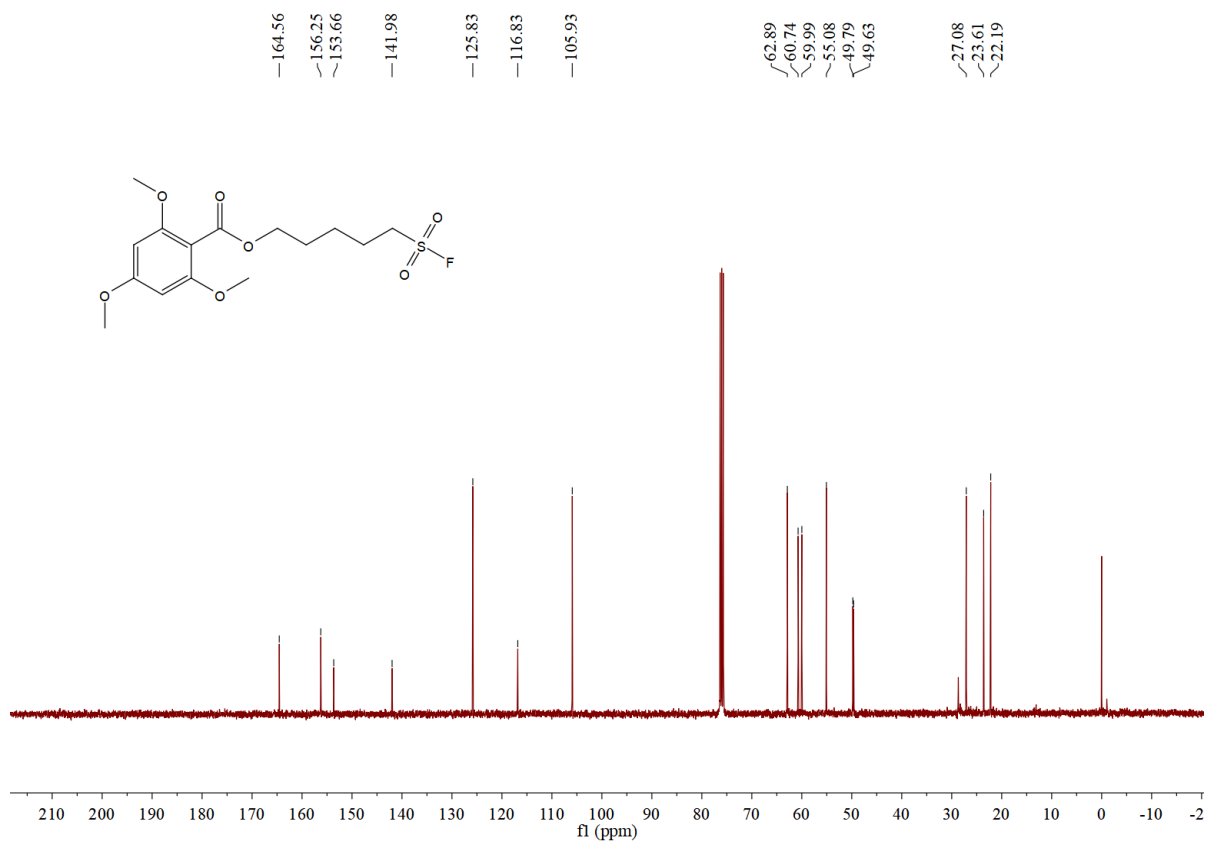

# <sup>19</sup>F NMR

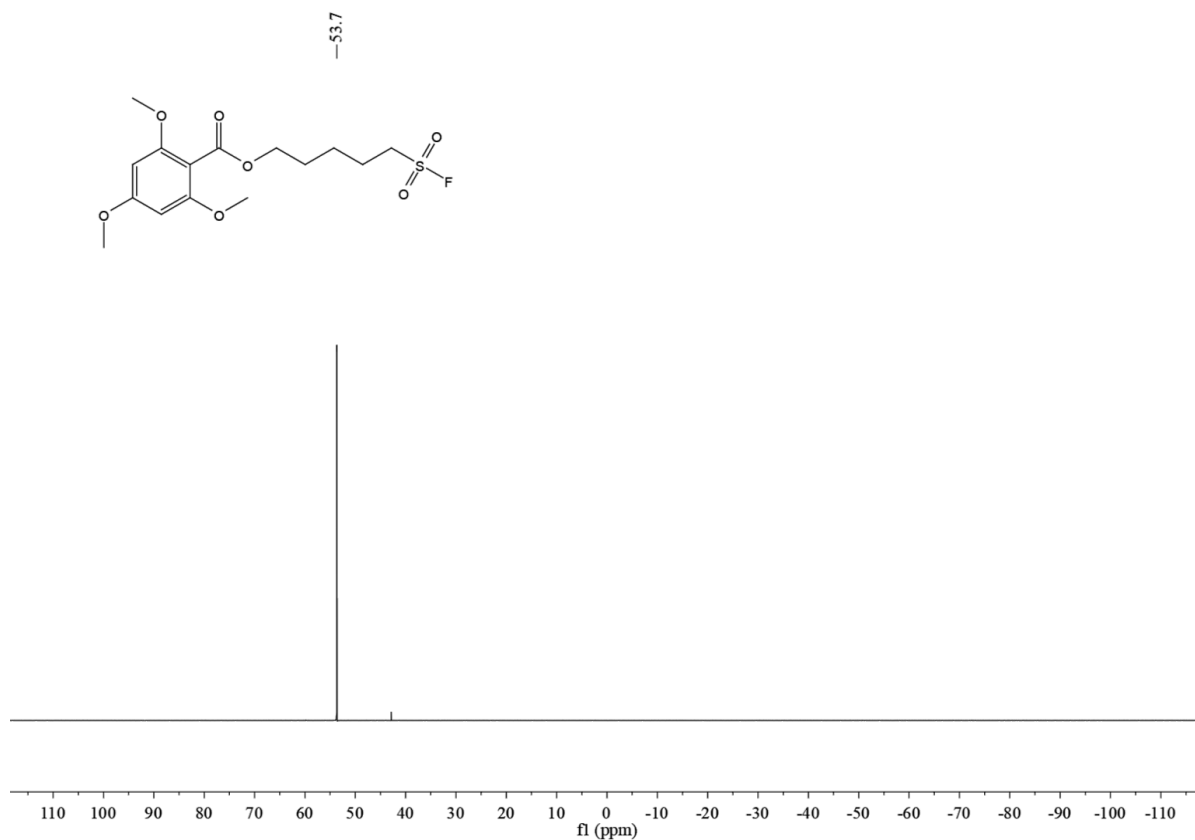

## 5-(fluorosulfonyl)pentyl 2-naphthoate (4t)

### <sup>1</sup>H NMR

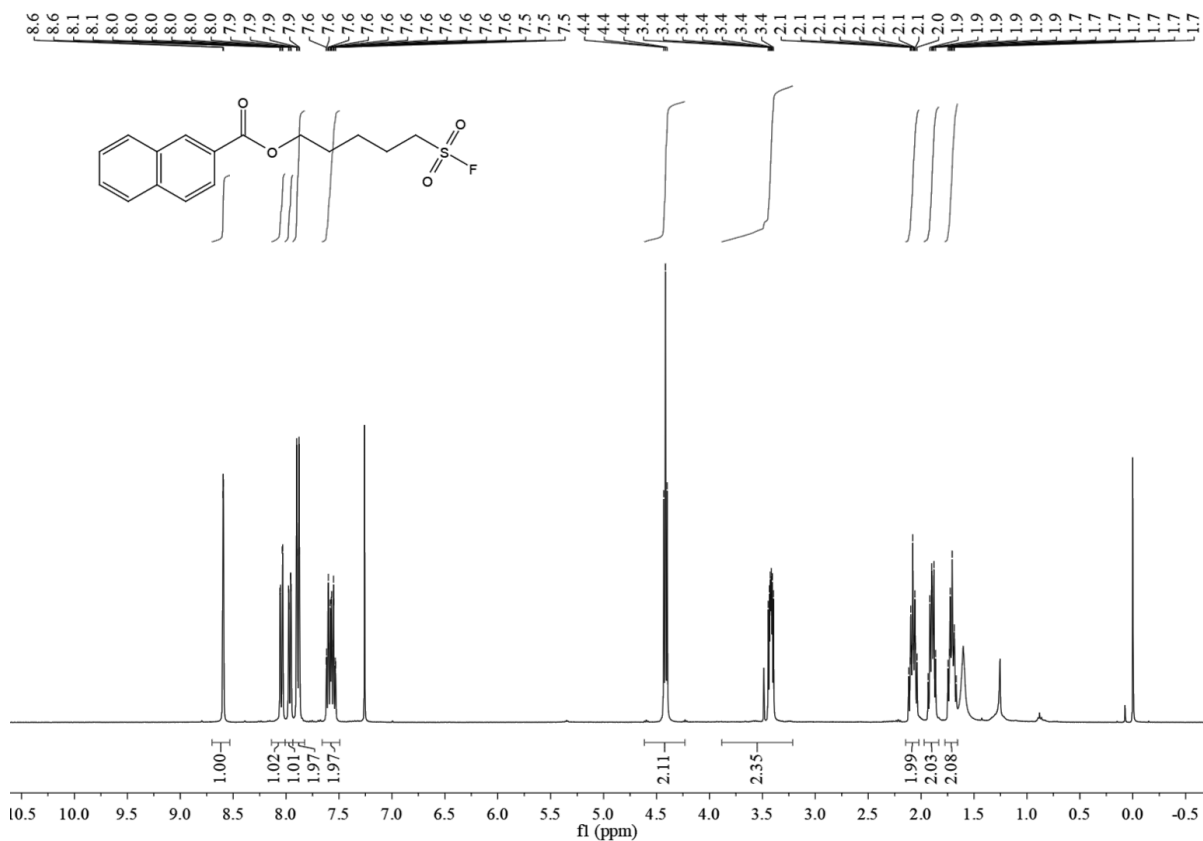

# <sup>13</sup>C NMR

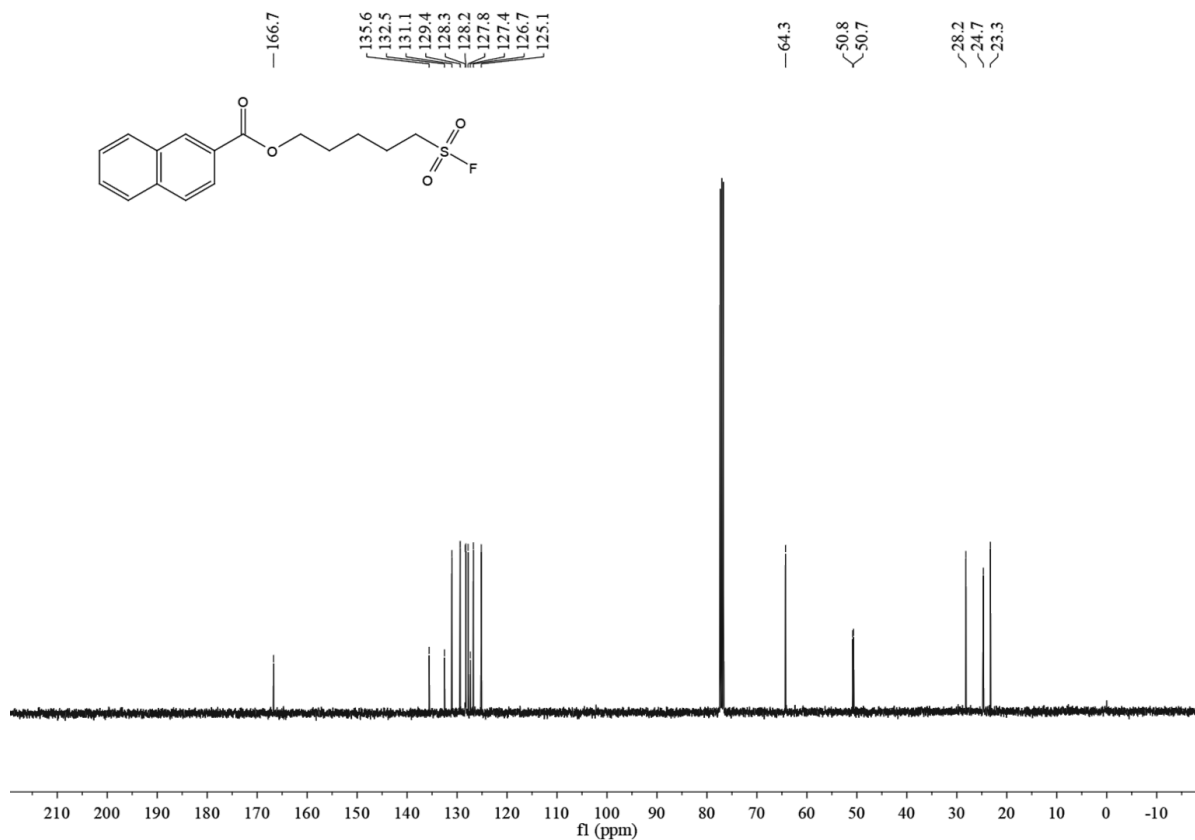

# <sup>19</sup>F NMR

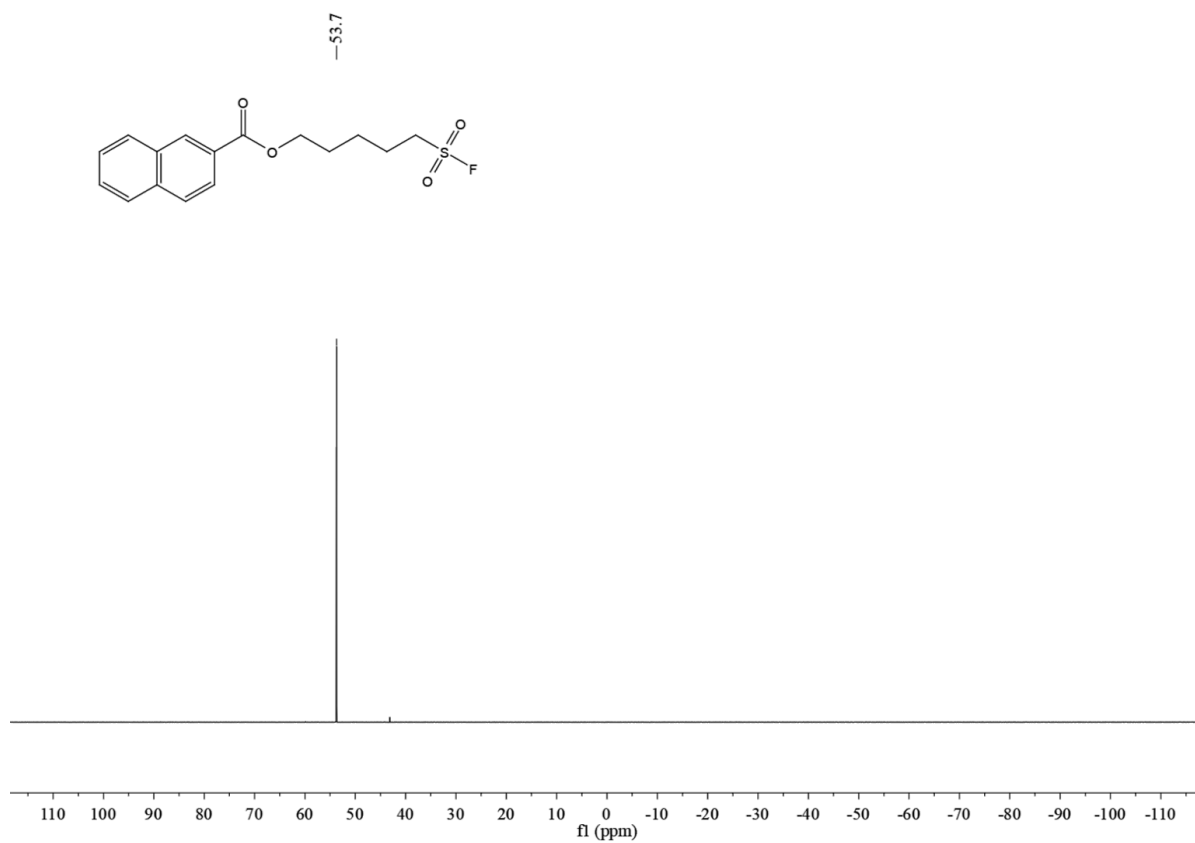

# 5-(fluorosulfonyl)pentyl picolinate (**4u**)

## <sup>1</sup>H NMR

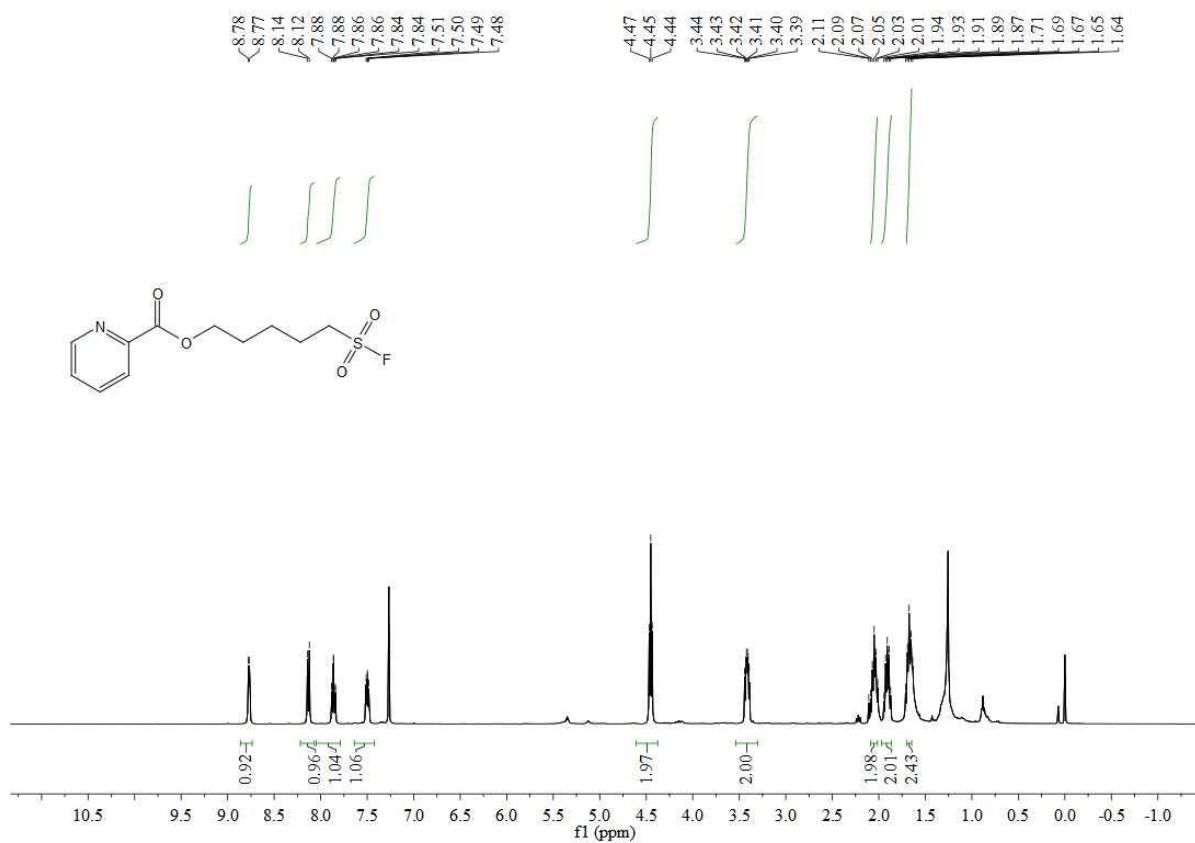

## <sup>13</sup>C NMR

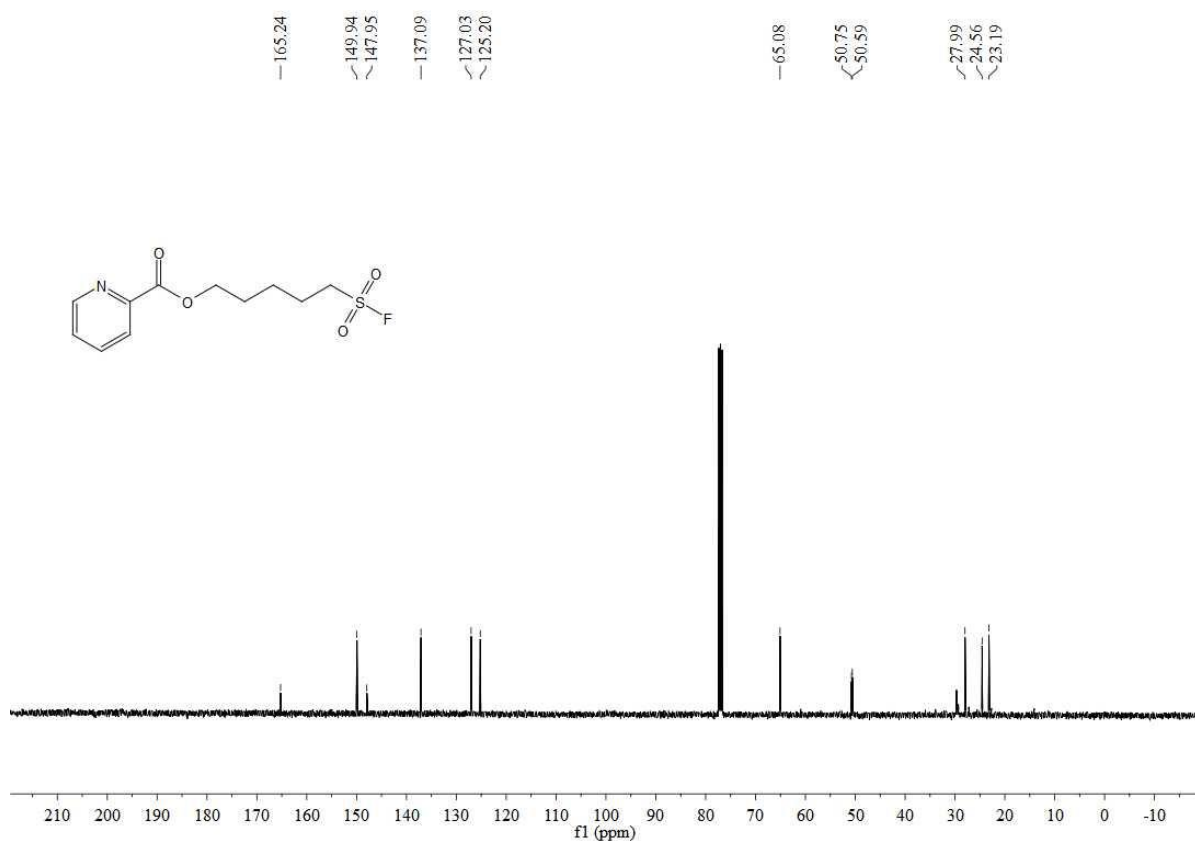

# <sup>19</sup>F NMR

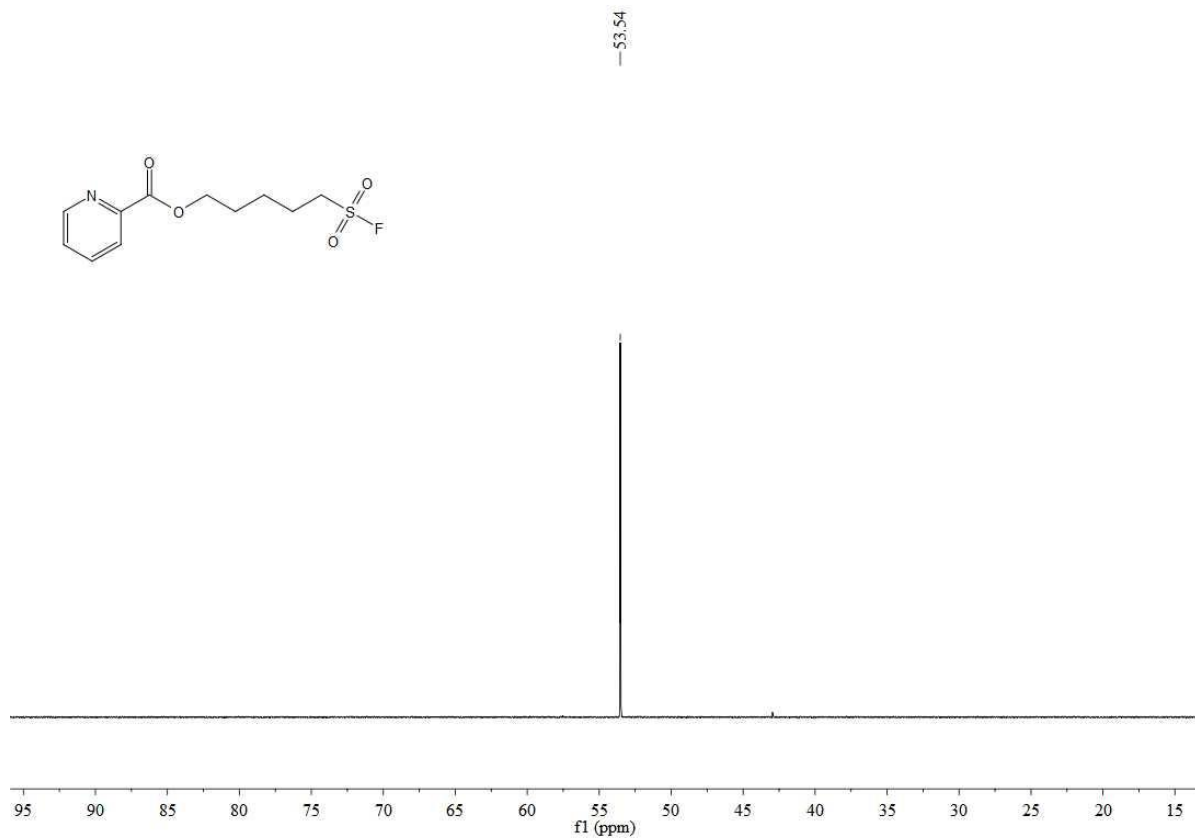

# 5-(fluorosulfonyl)pentyl pyrazine-2-carboxylate (4v)

## <sup>1</sup>H NMR

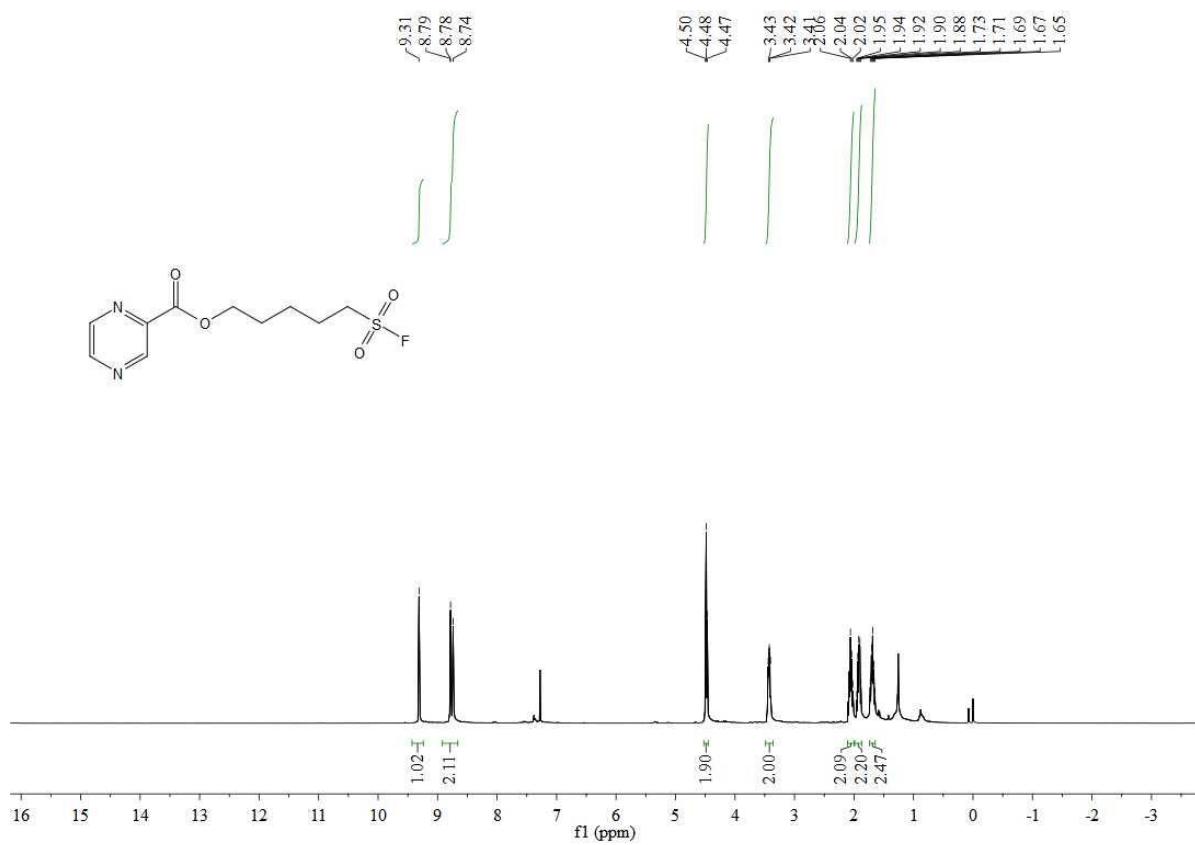

# <sup>13</sup>C NMR

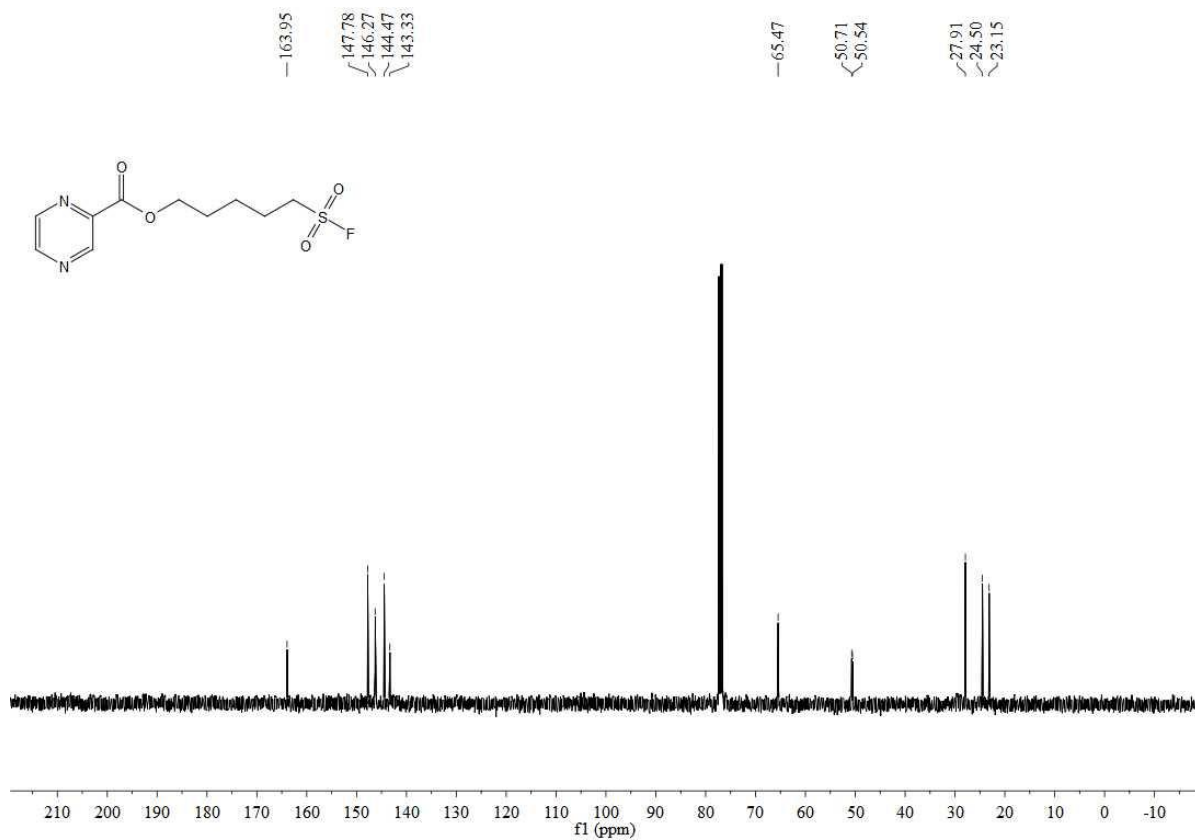

# <sup>19</sup>F NMR

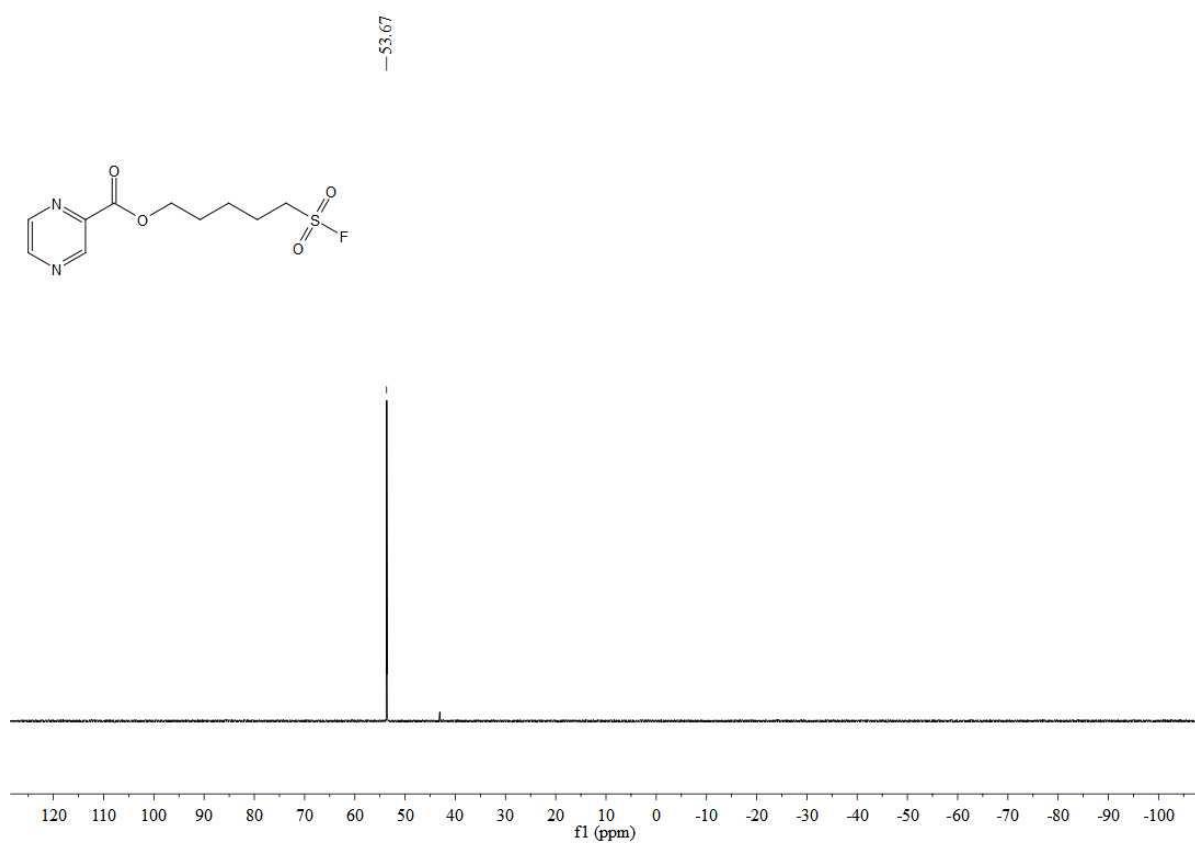



5-(fluorosulfonyl)pentyl thiophene-2-carboxylate (**4w**)

<sup>1</sup>H NMR

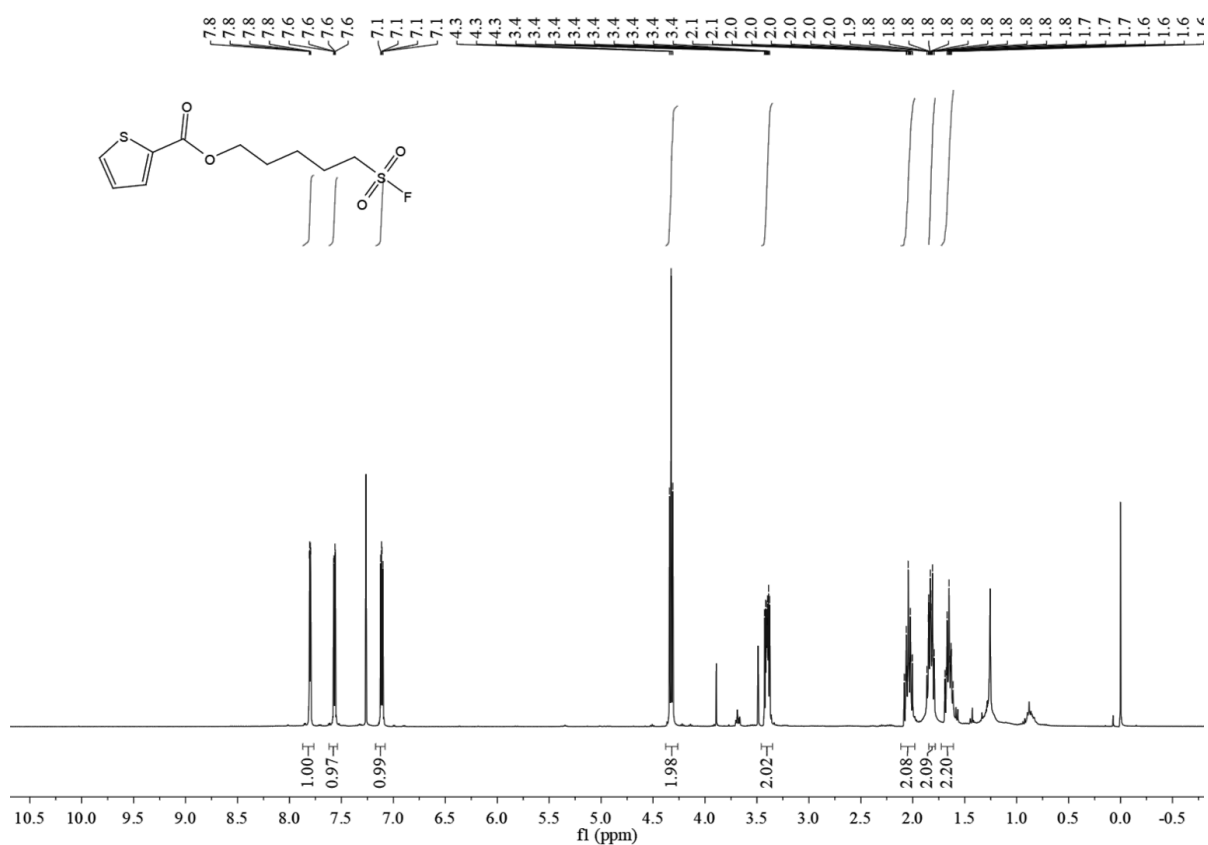

<sup>13</sup>C NMR

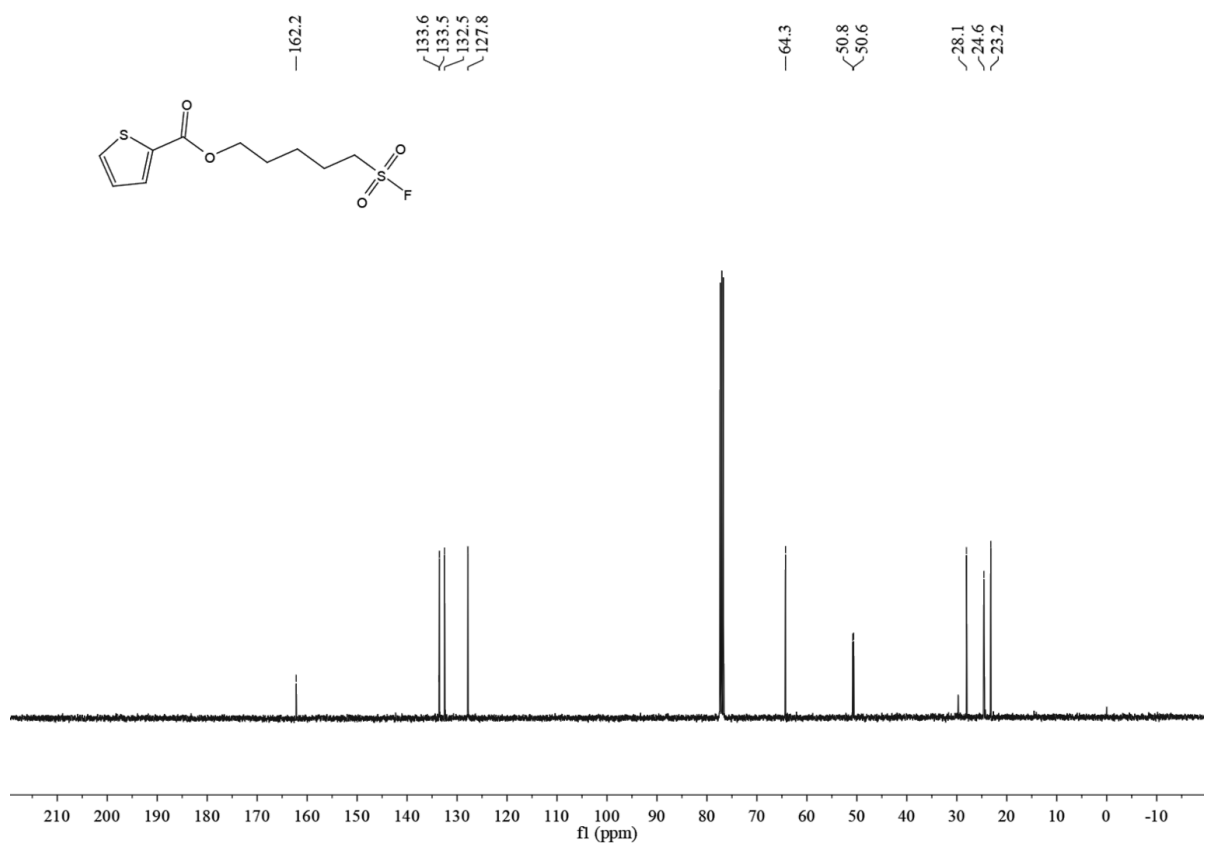

# <sup>19</sup>F NMR

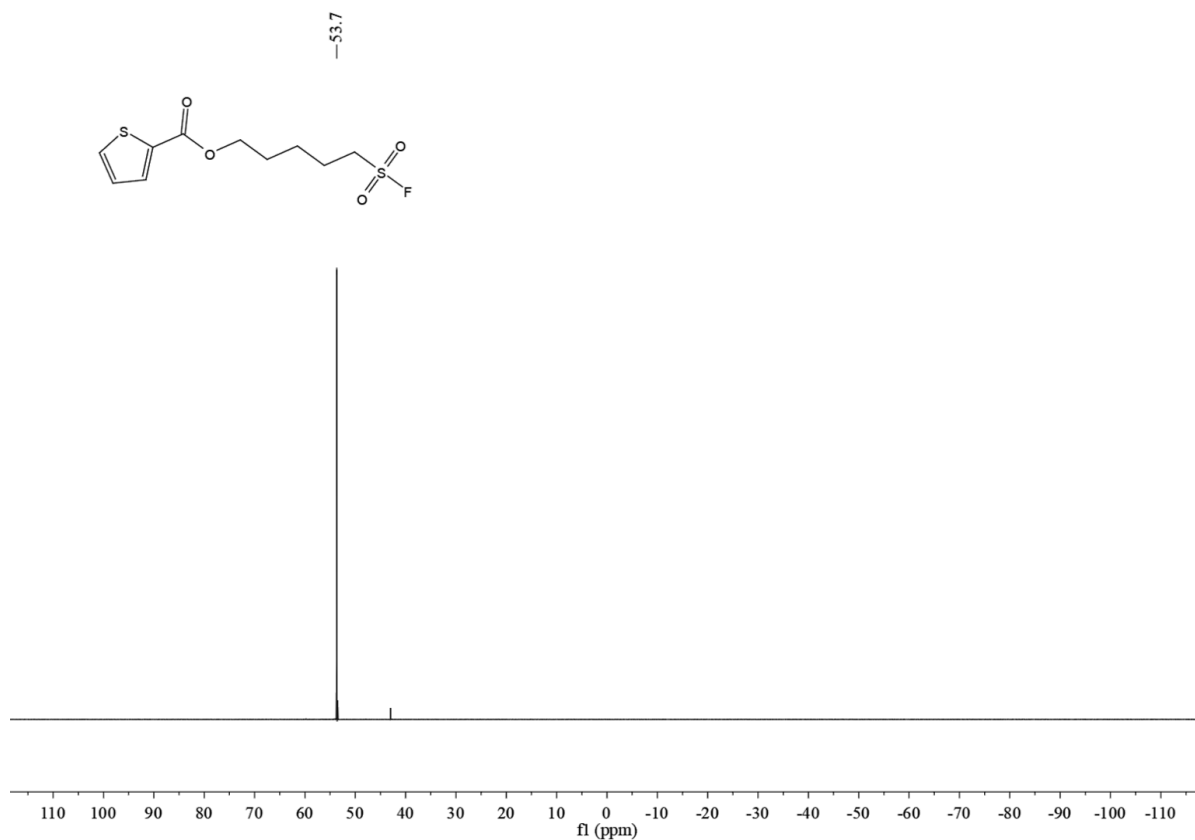

# 5-(fluorosulfonyl)pentyl furan-2-carboxylate (4x)

## <sup>1</sup>H NMR

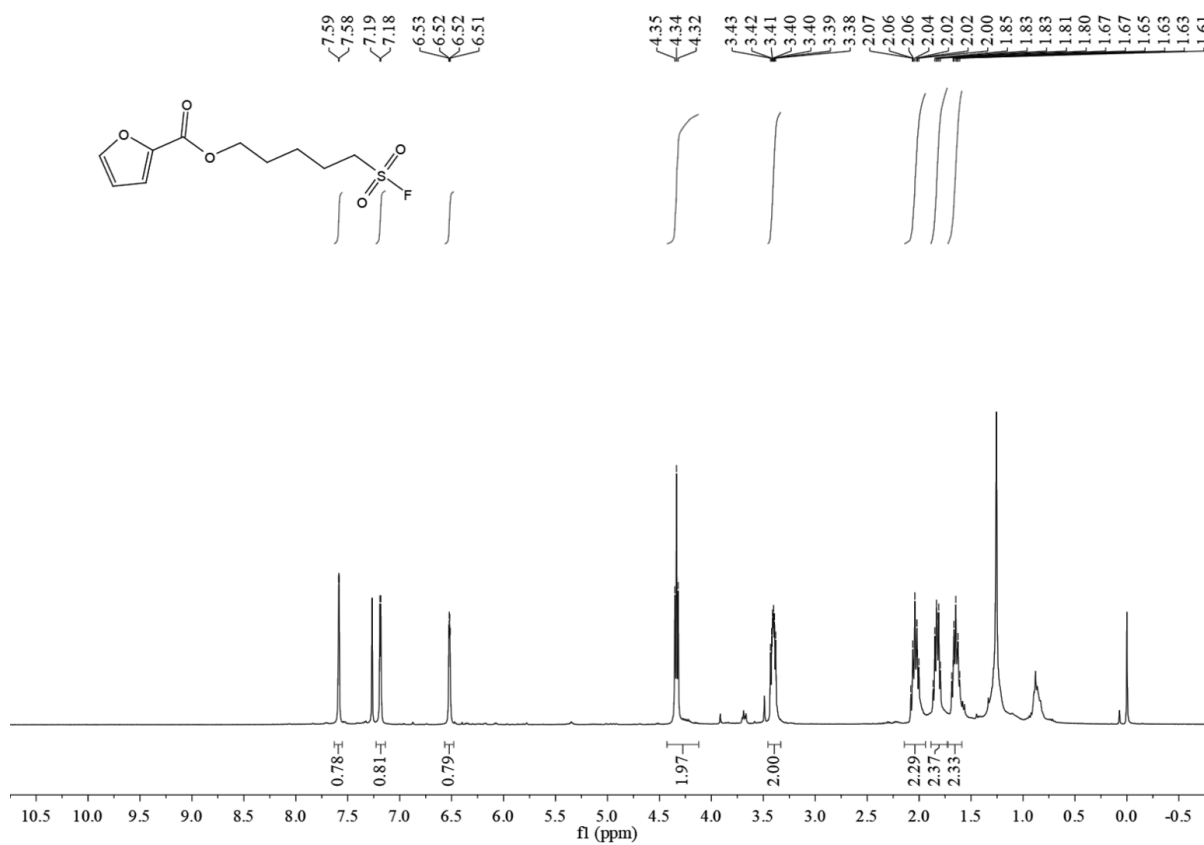

# <sup>13</sup>C NMR

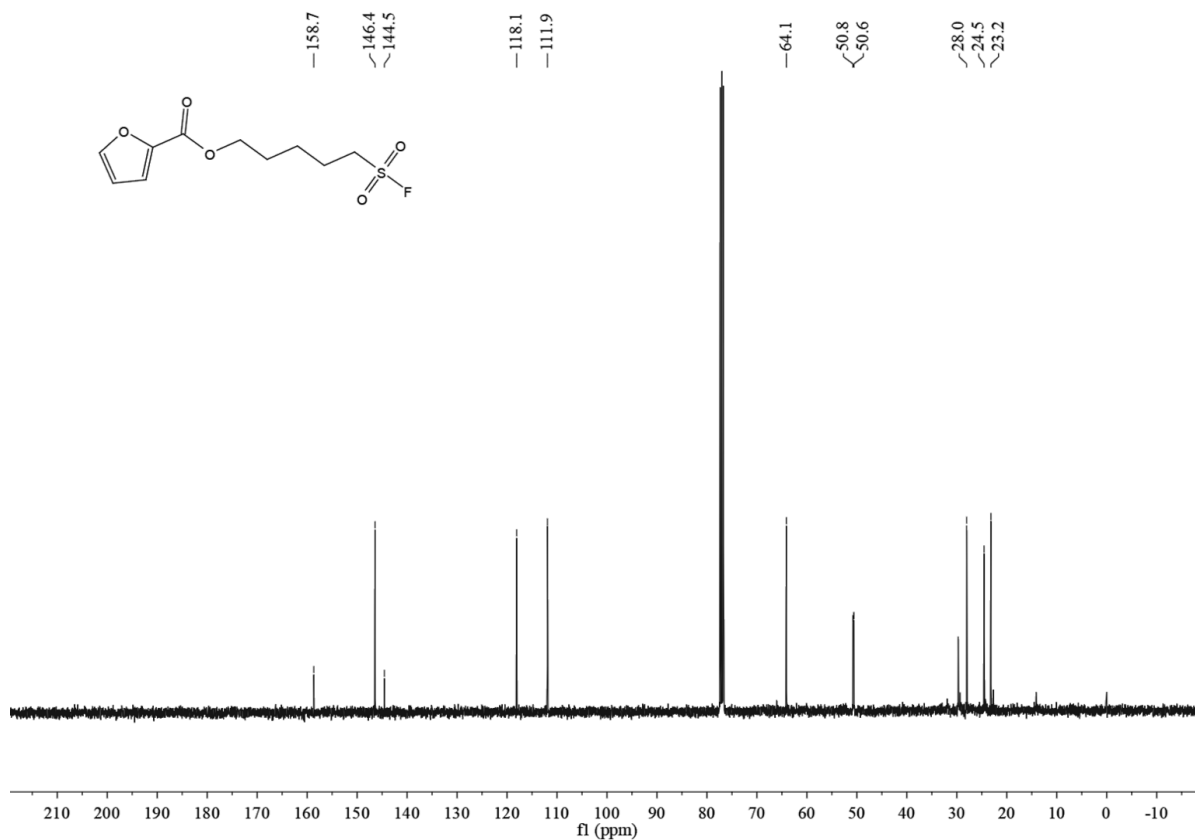

# <sup>19</sup>F NMR

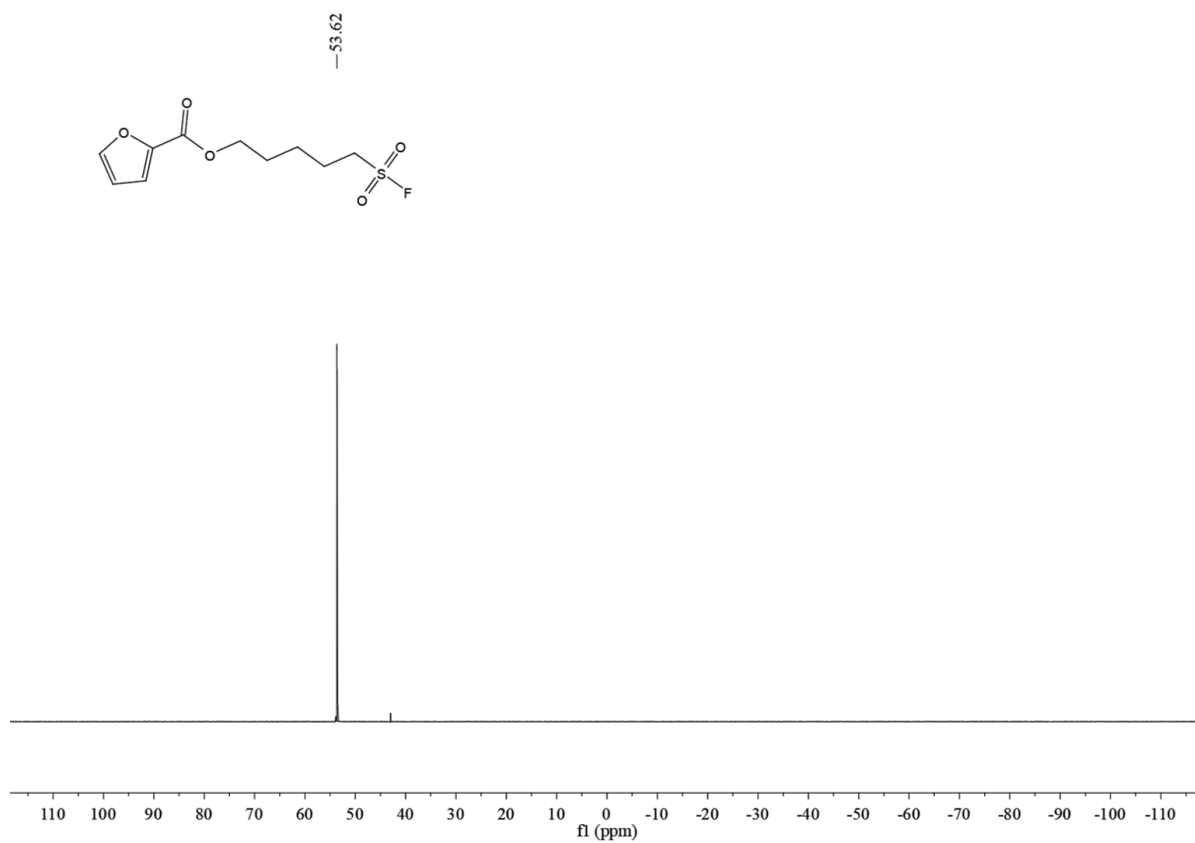

5-(fluorosulfonyl)pentyl 4-methylbenzenesulfonate (**4y**)

<sup>1</sup>H NMR

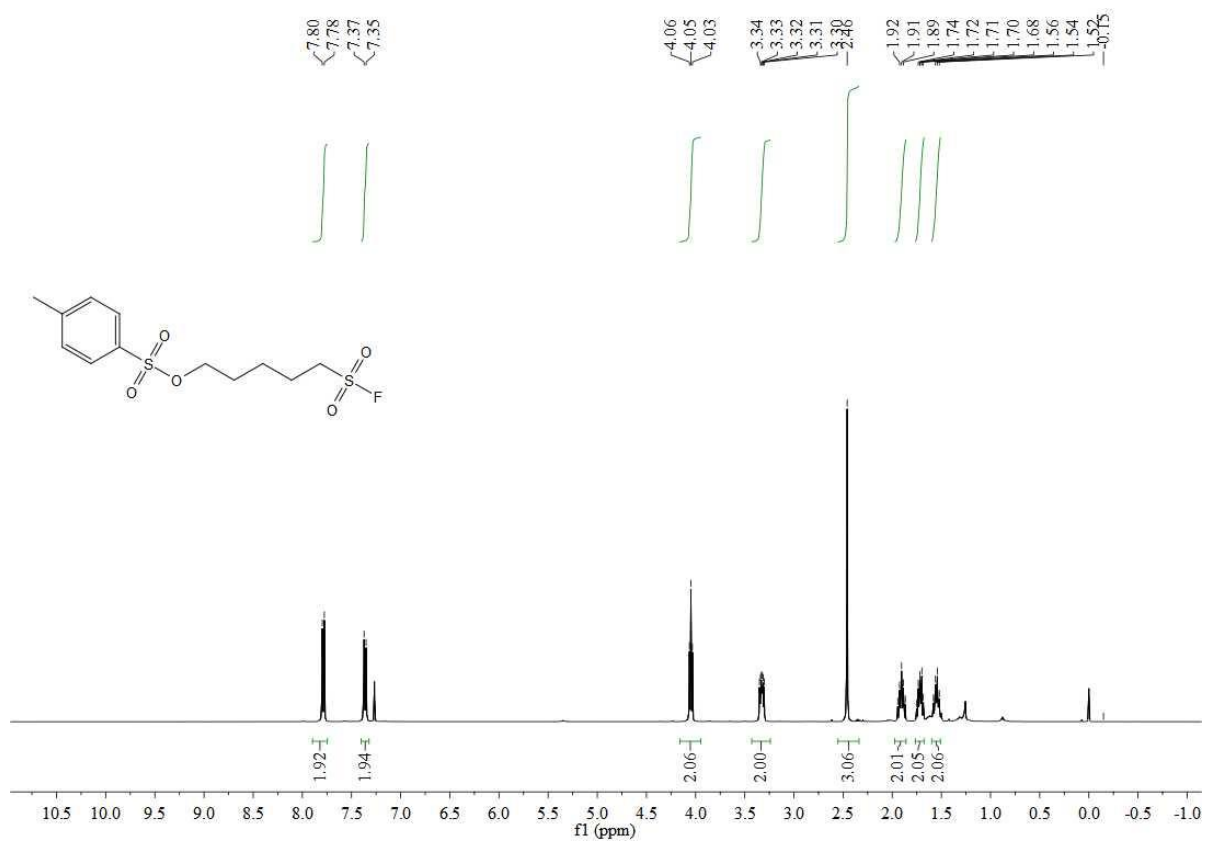

<sup>13</sup>C NMR

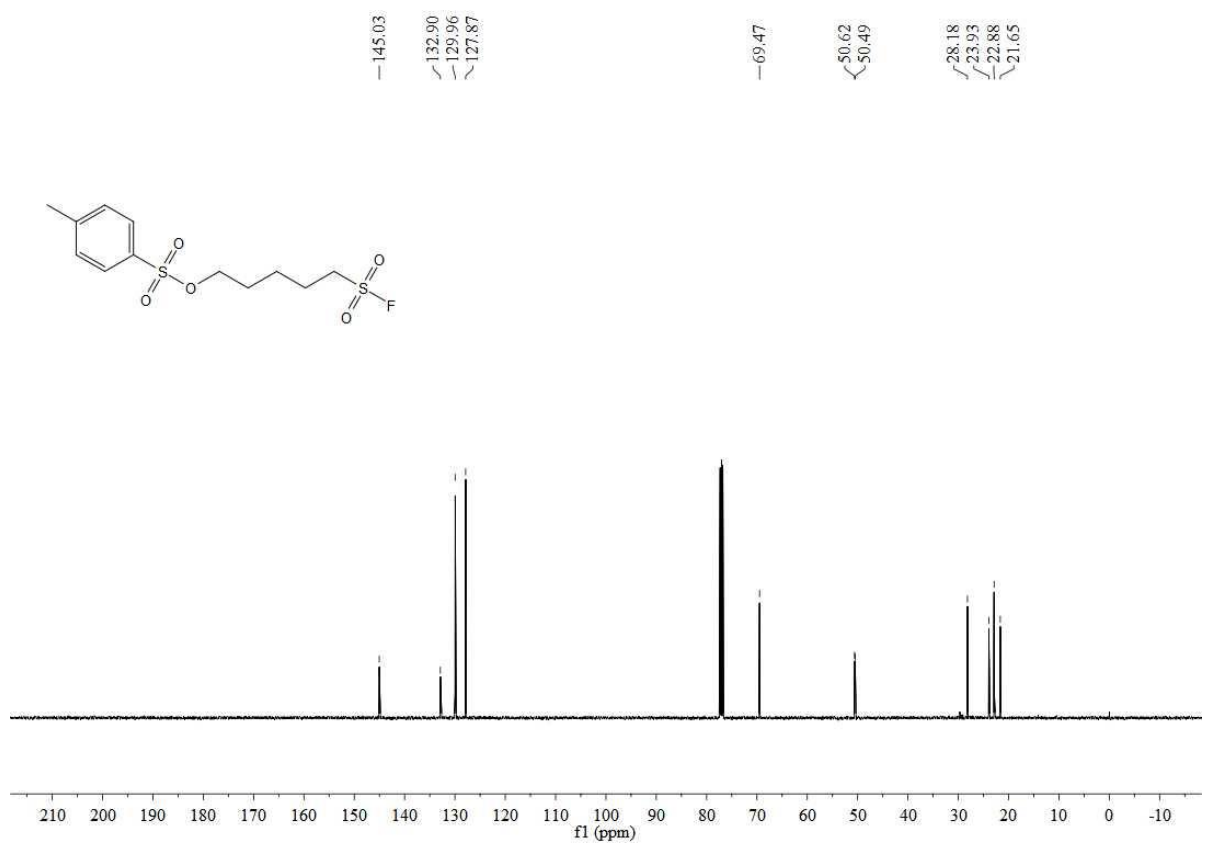

# <sup>19</sup>F NMR

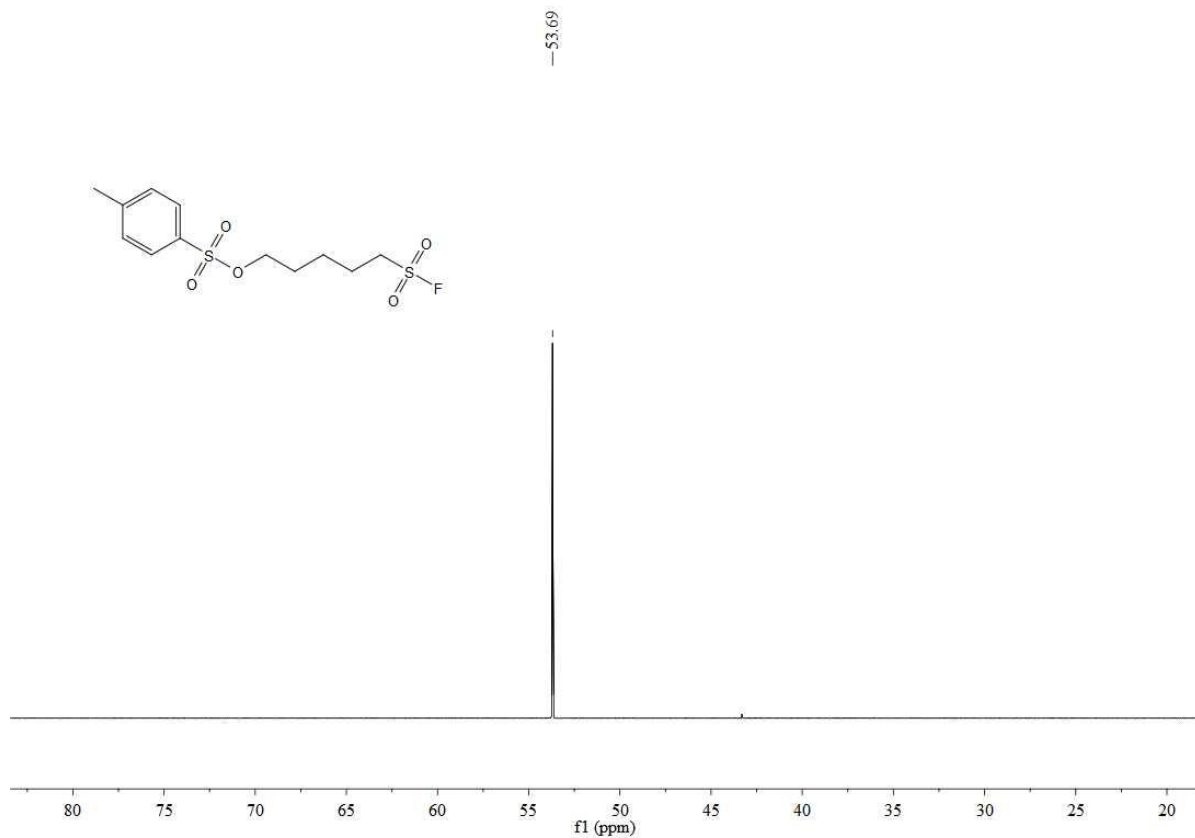

## 5-(fluorosulfonyl)pentyl 4-bromobenzenesulfonate (**4z**)

### <sup>1</sup>H NMR

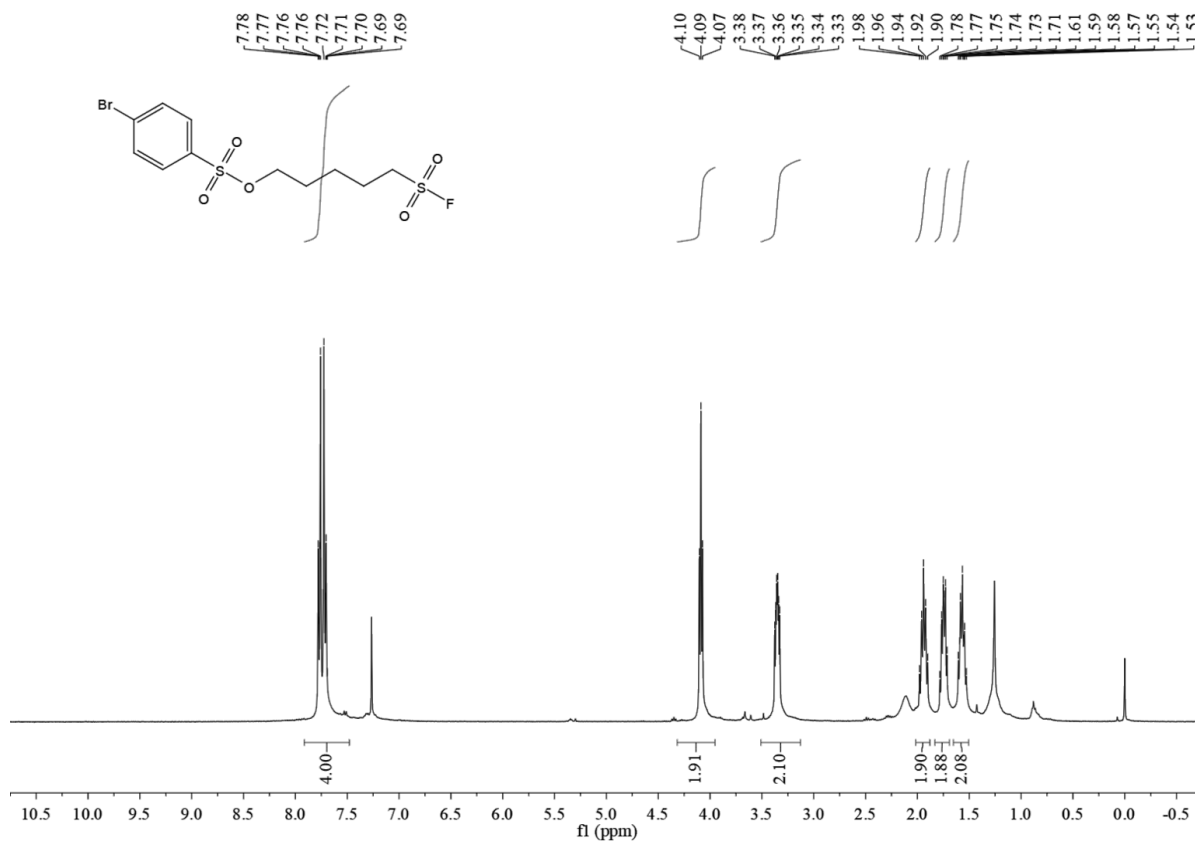

# <sup>13</sup>C NMR

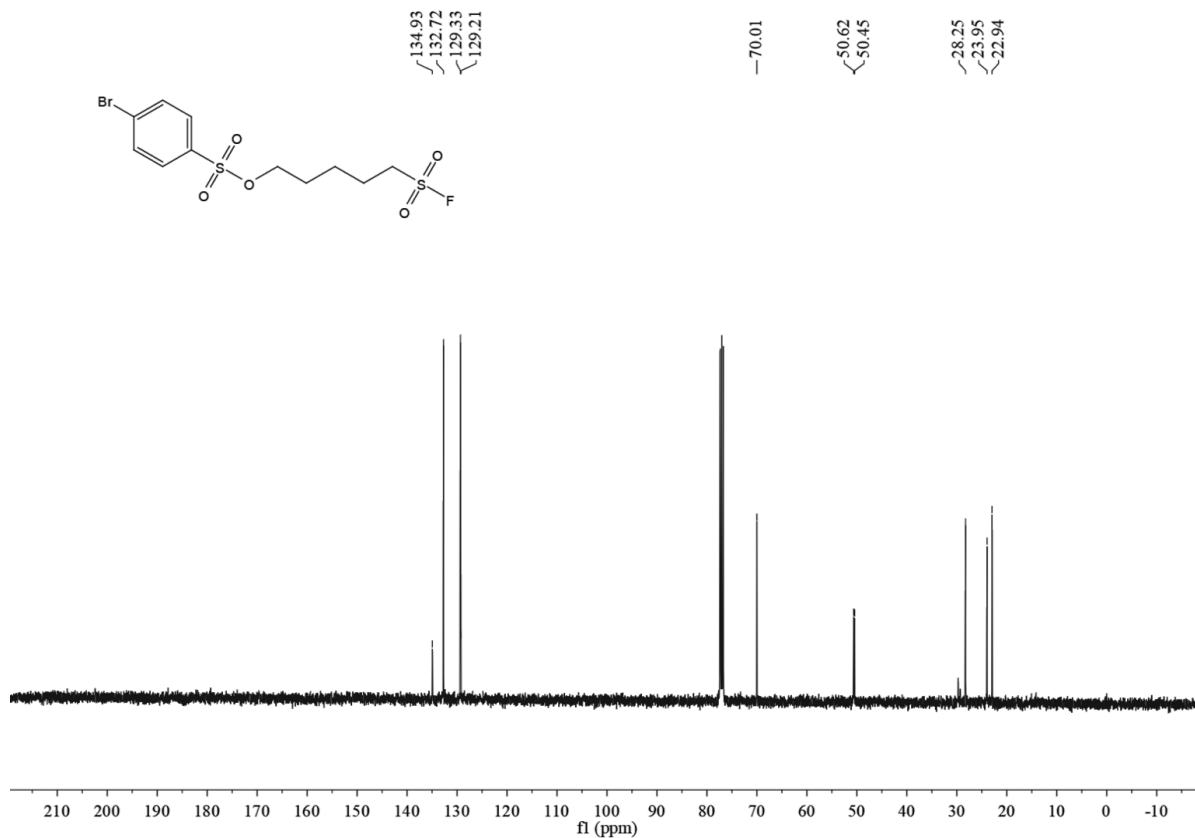

# <sup>19</sup>F NMR

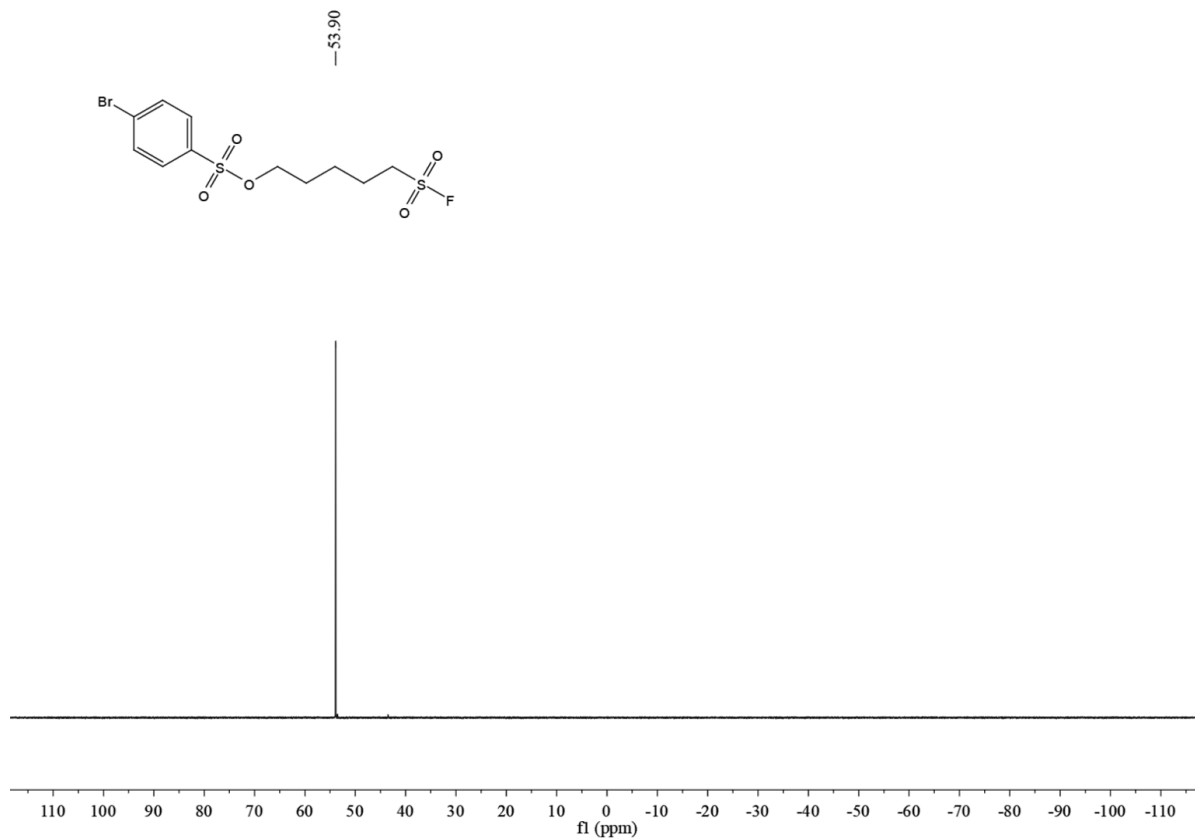

*tert*-butyl 4-((5-(fluorosulfonyl)pentanoyl)oxy)piperidine-1-carboxylate (**4aa**)

<sup>1</sup>H NMR

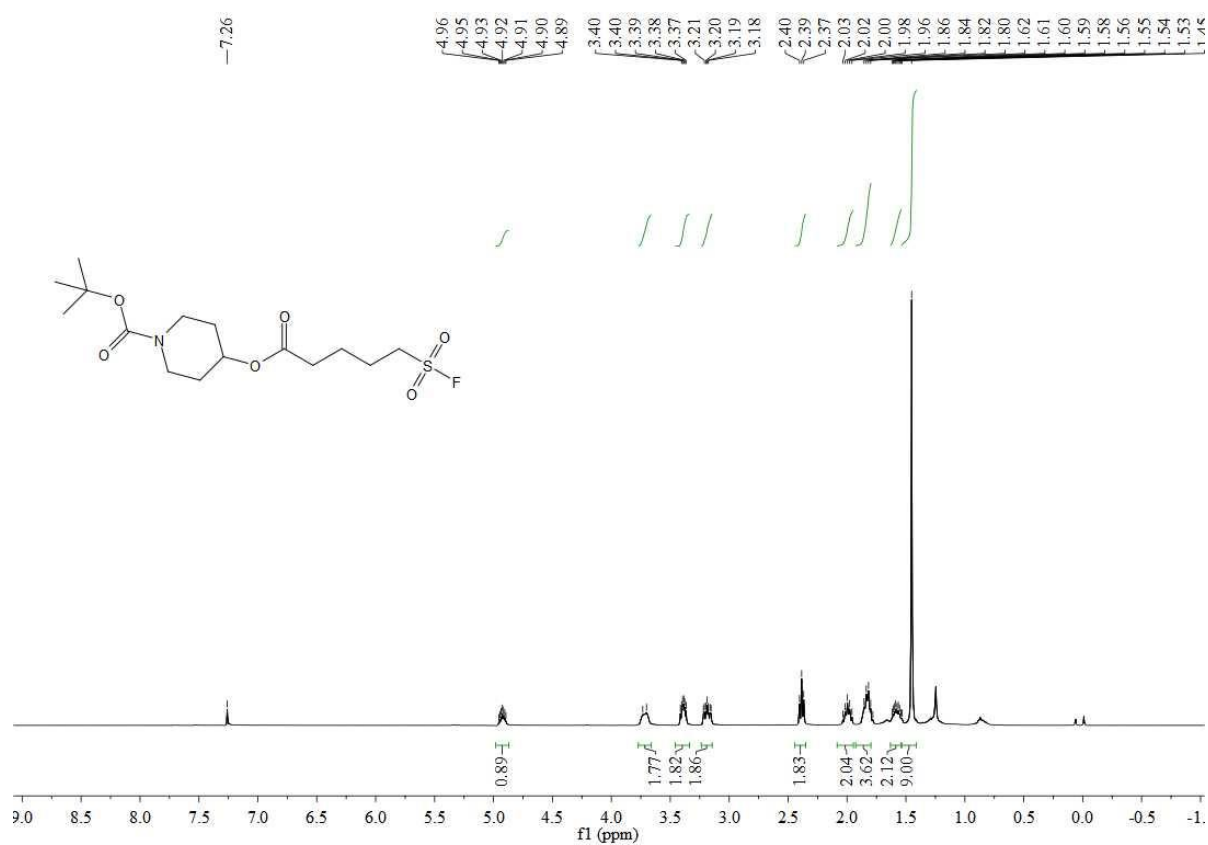

<sup>13</sup>C NMR

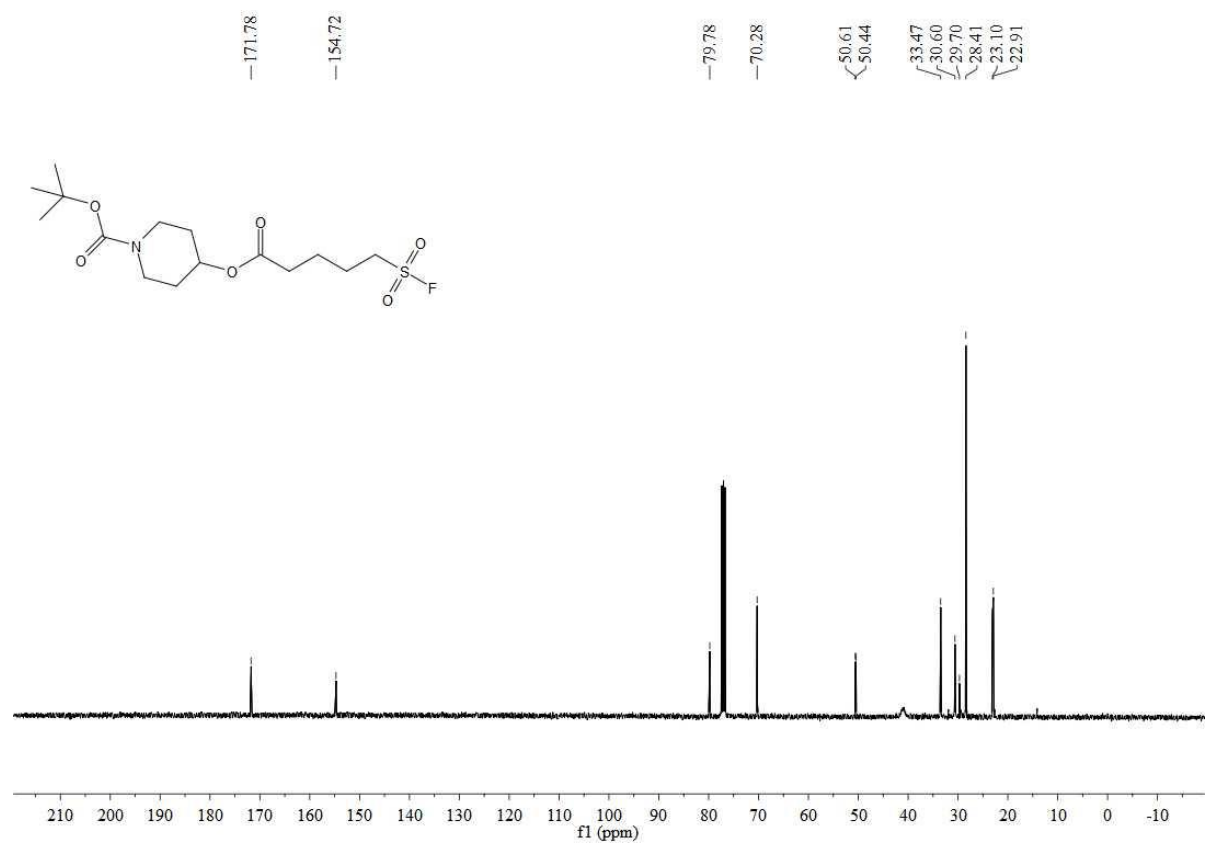

# <sup>19</sup>F NMR

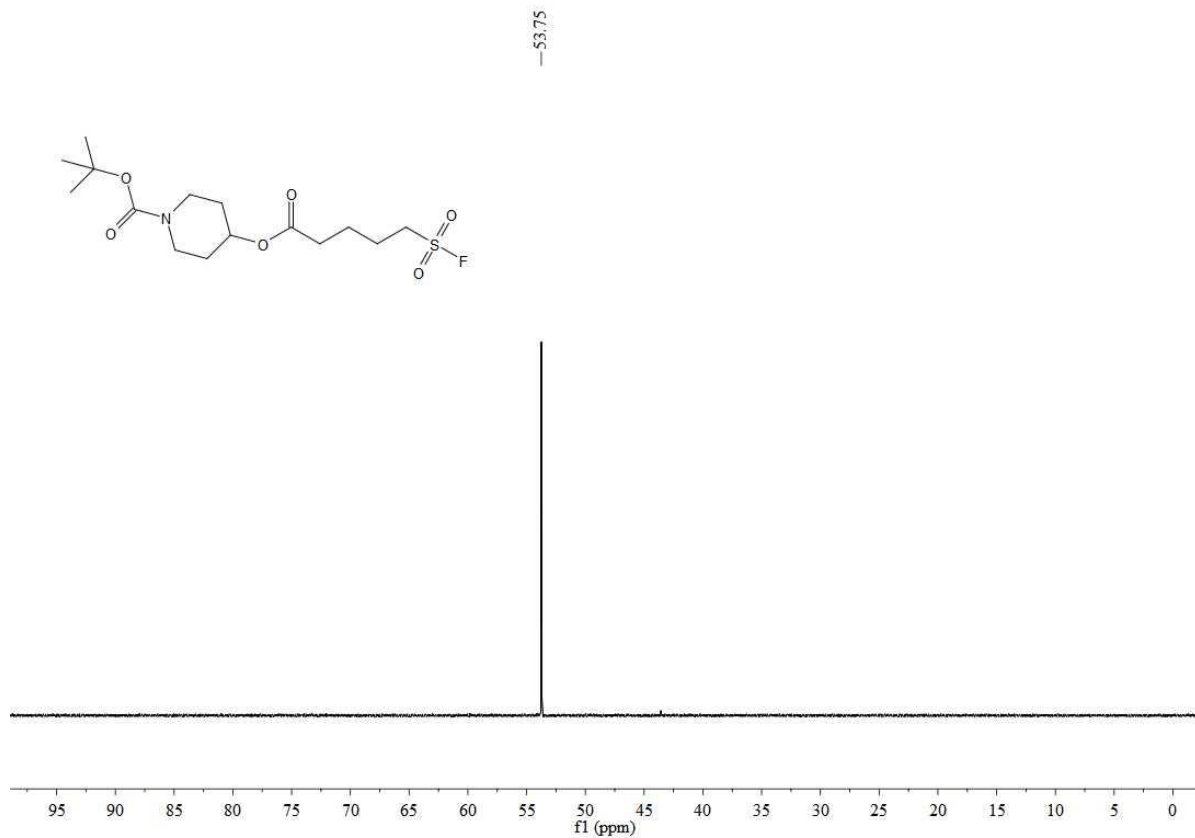

## diethyl (5-(fluorosulfonyl)pentyl) phosphate (4ab)

### <sup>1</sup>H NMR

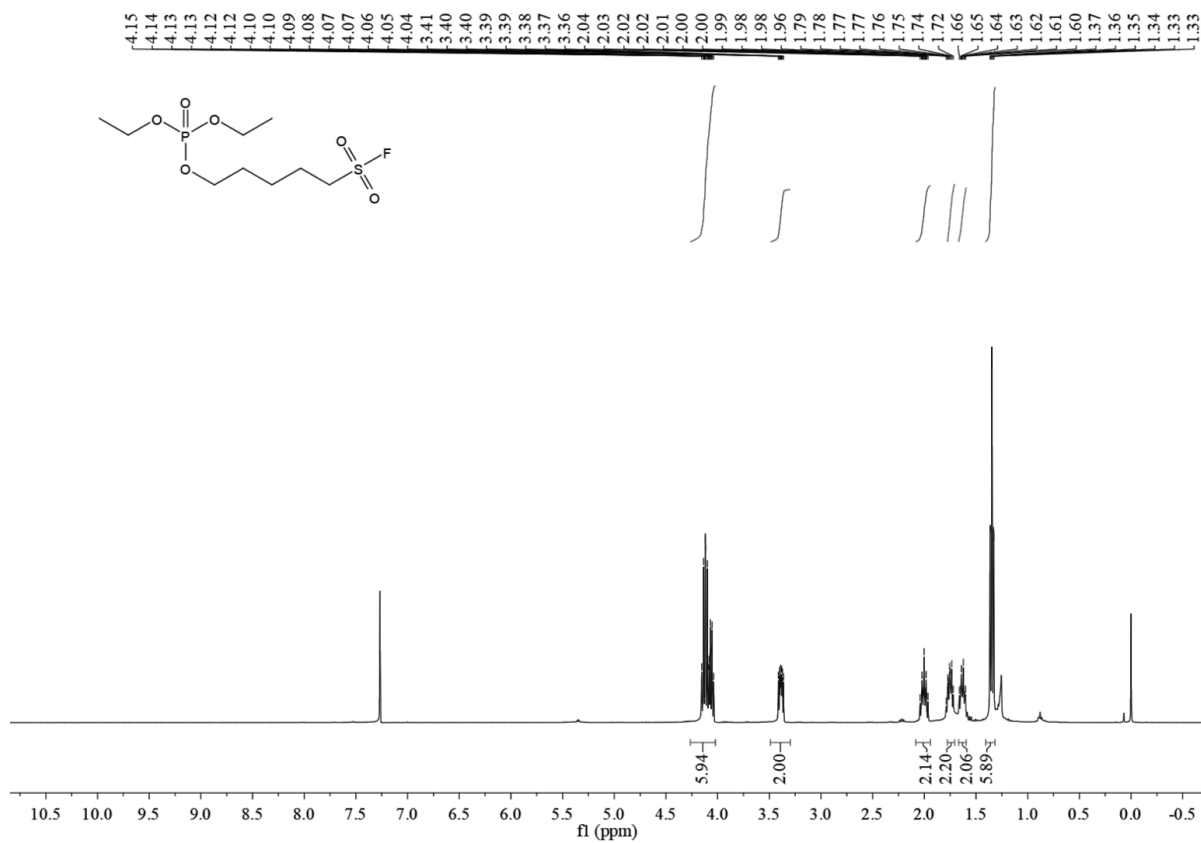



# <sup>13</sup>C NMR

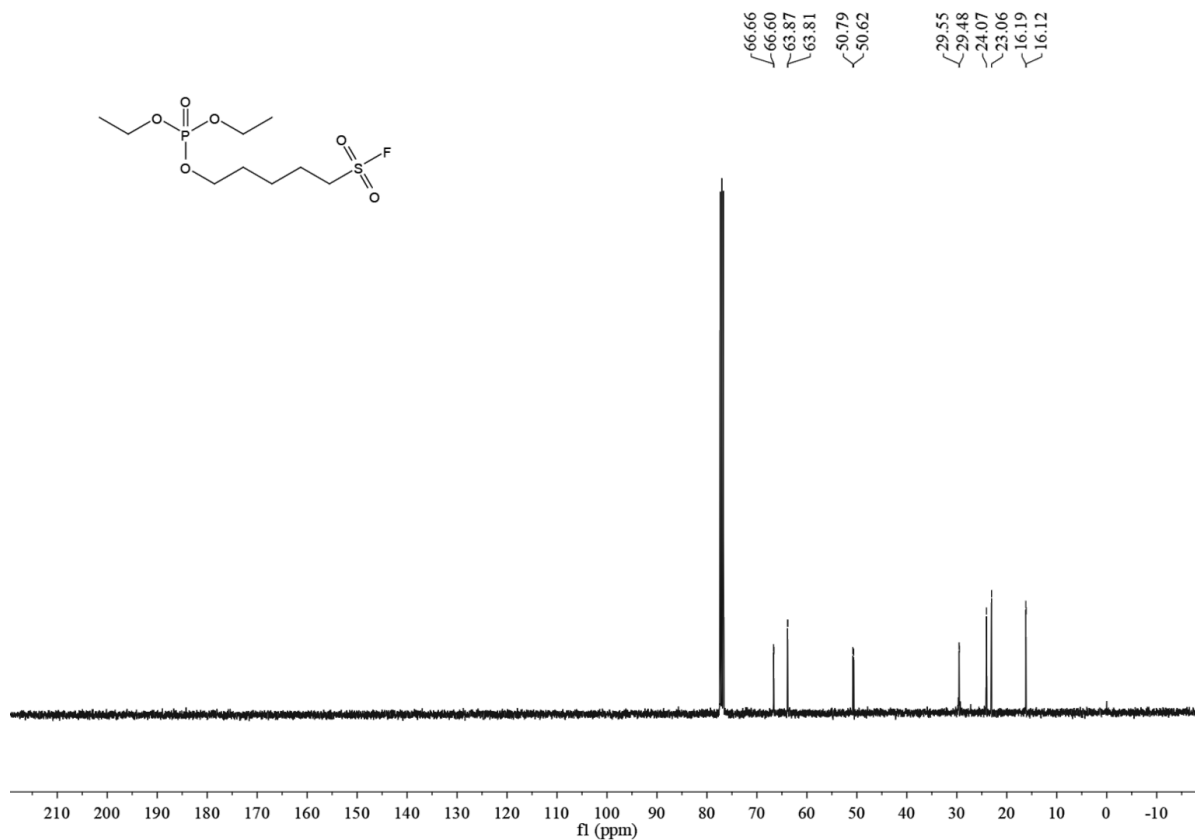

# <sup>19</sup>F NMR

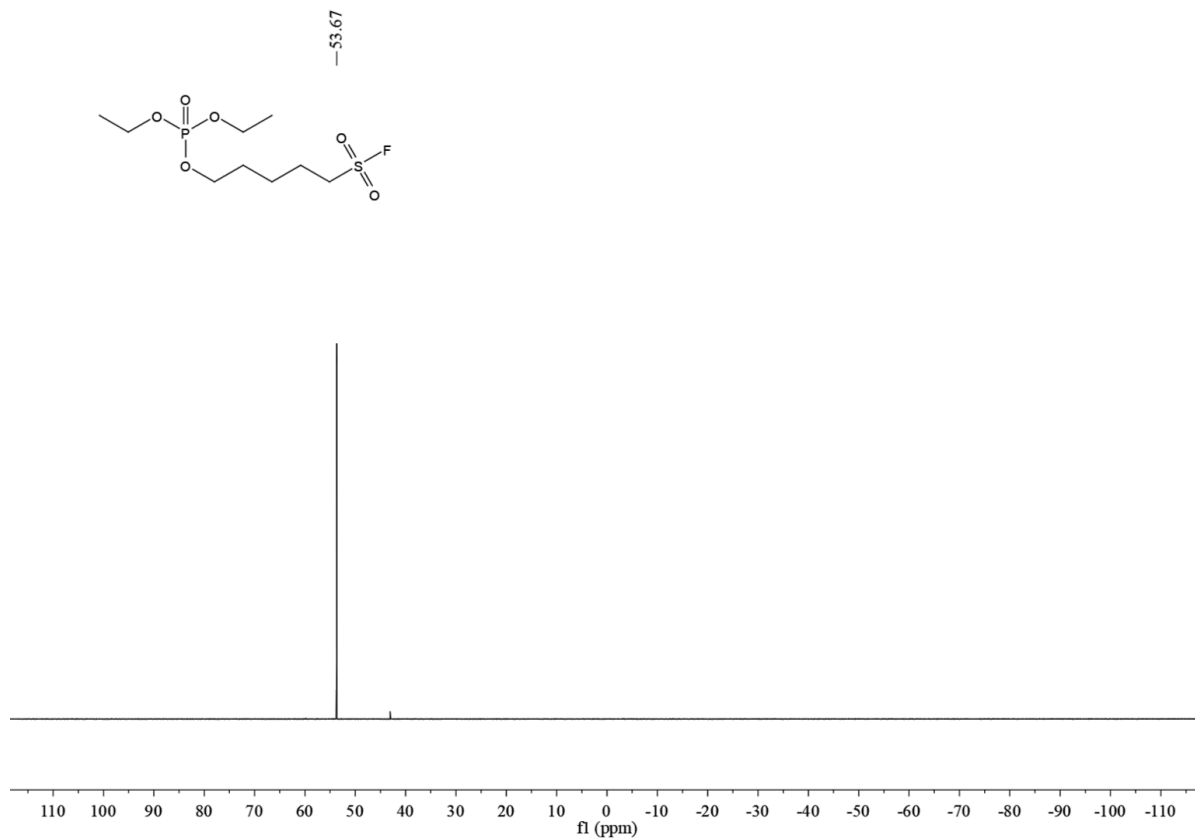

# <sup>31</sup>P NMR

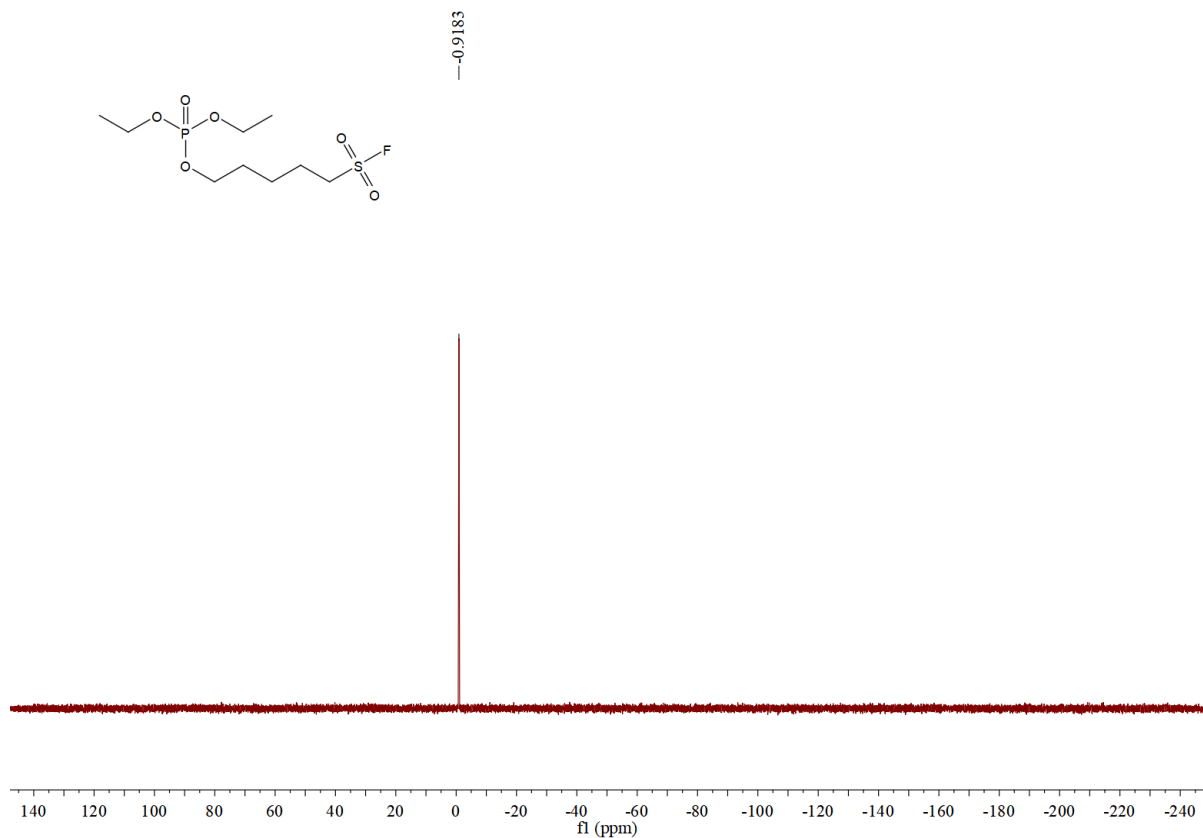

# cyclooctanesulfonyl fluoride (4ac)

## <sup>1</sup>H NMR

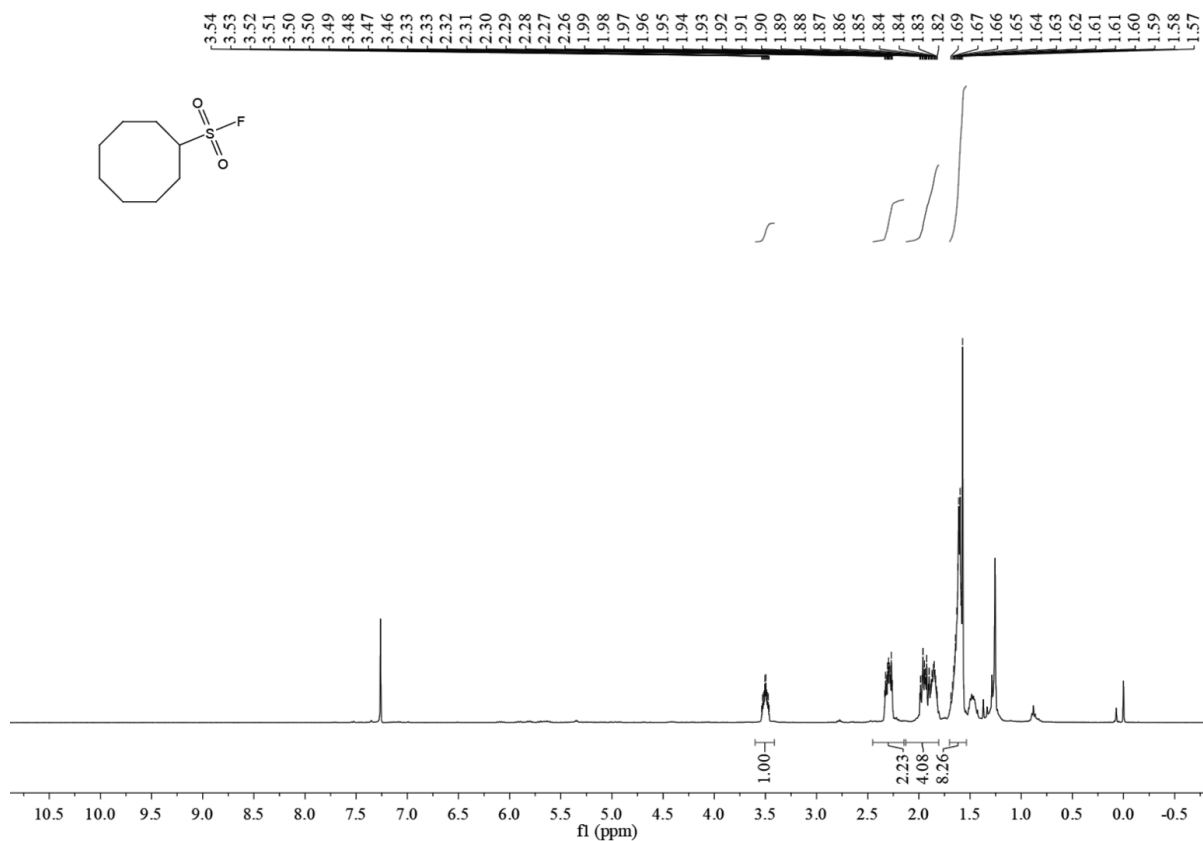

# <sup>13</sup>C NMR

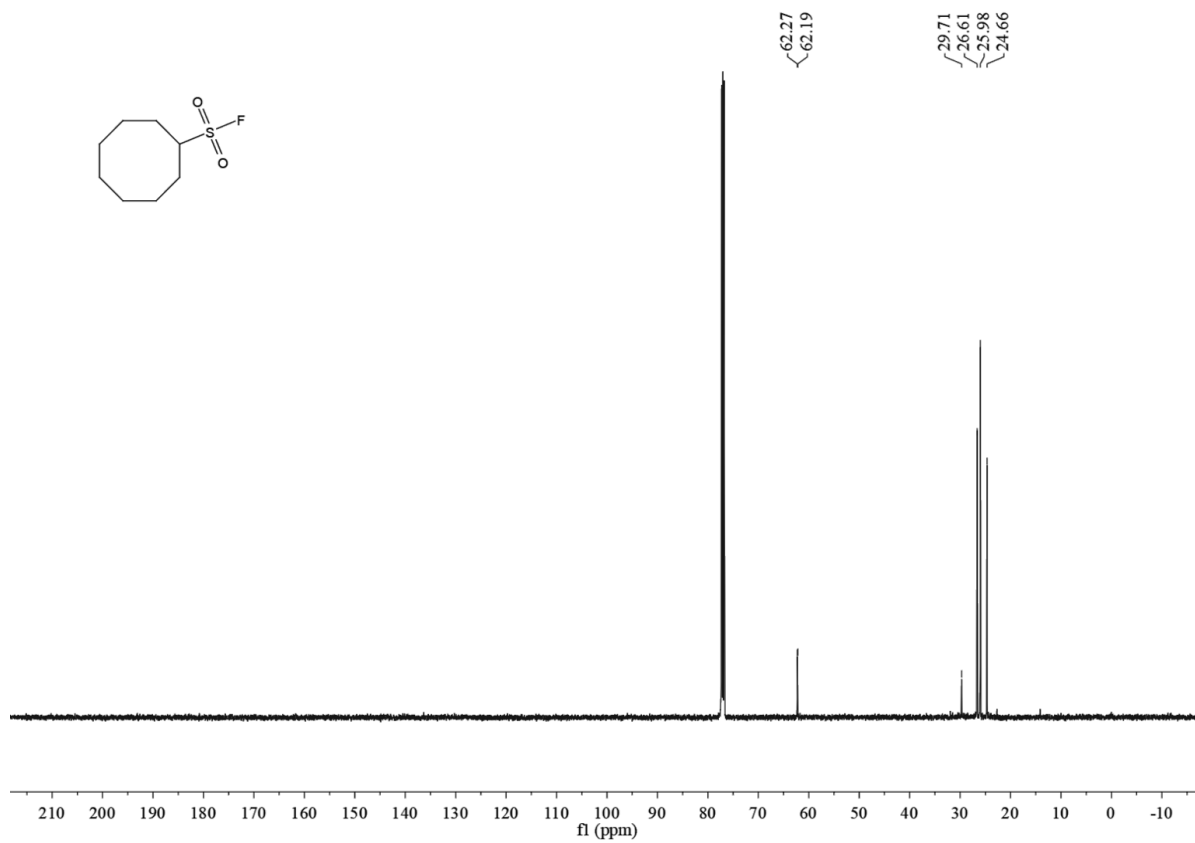

# <sup>19</sup>F NMR

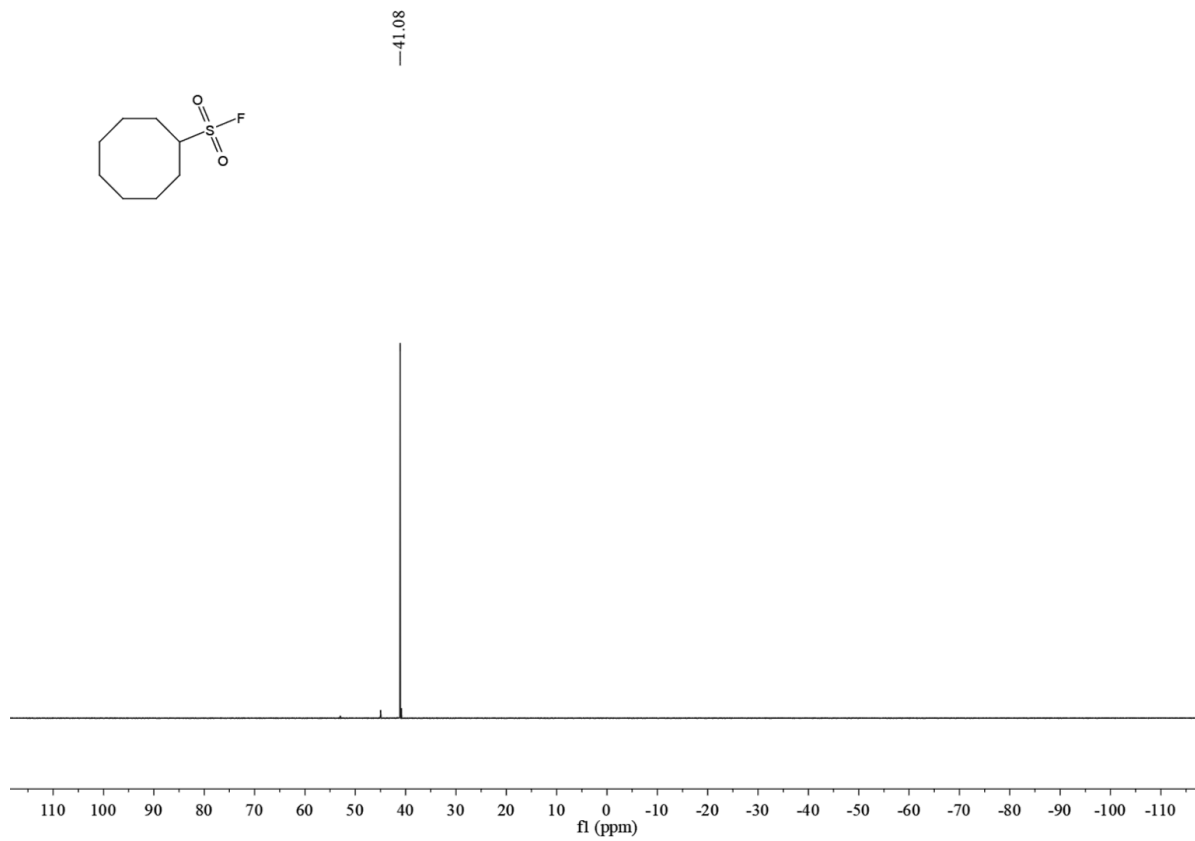

cycloheptanesulfonyl fluoride (4ad)

<sup>1</sup>H NMR

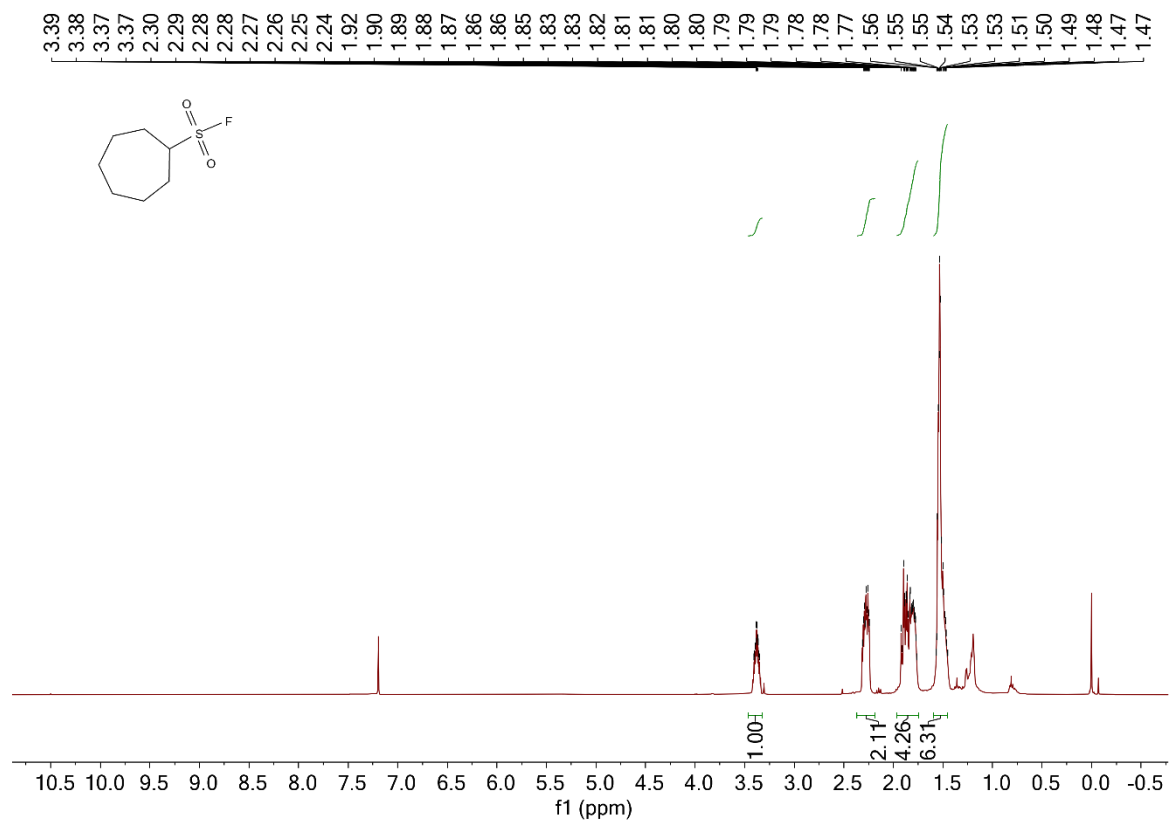

<sup>13</sup>C NMR

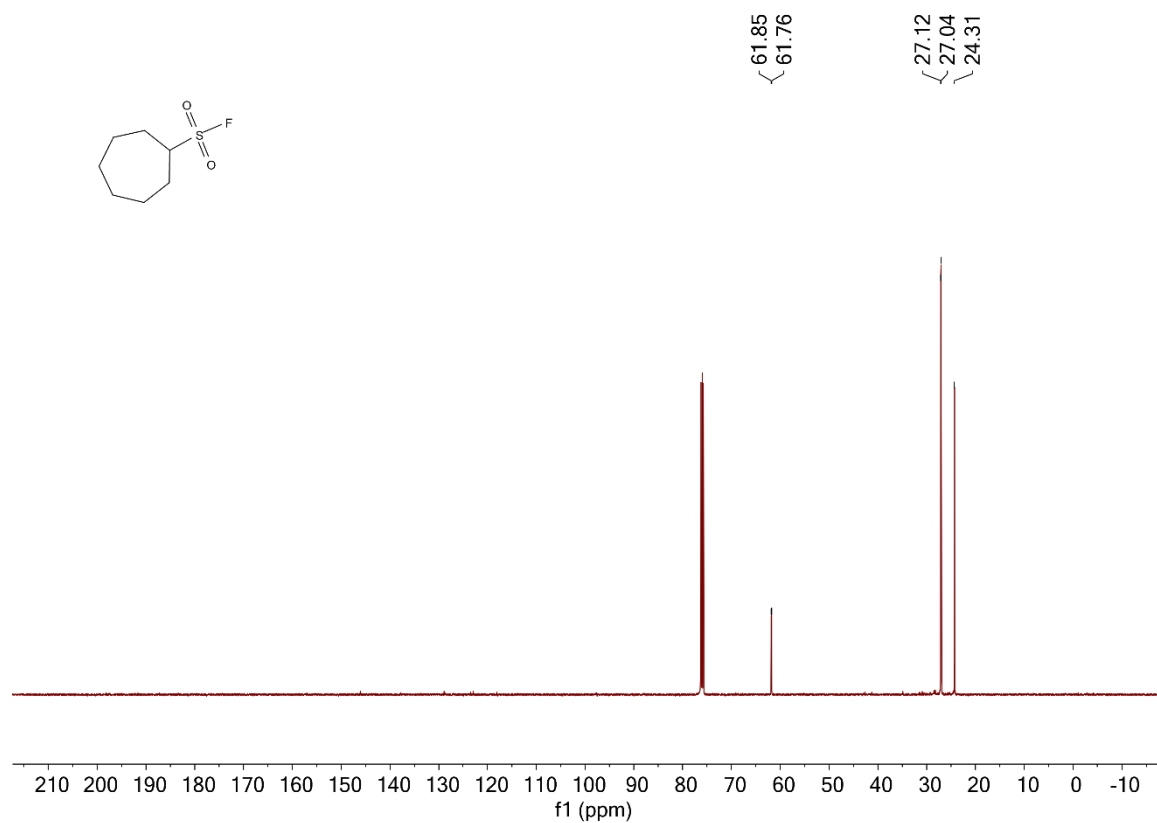

# <sup>19</sup>F NMR

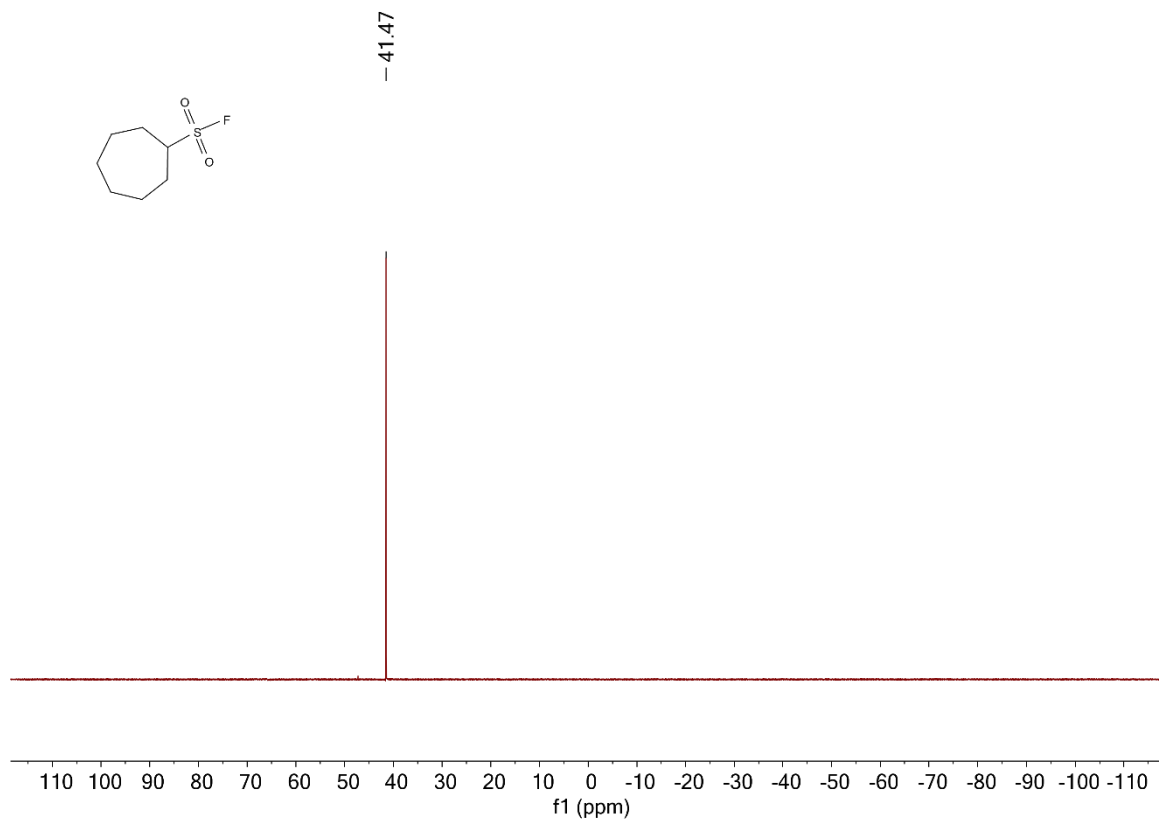

## 3-(fluorosulfonyl)-2-methylpropyl benzoate (4ae)

### <sup>1</sup>H NMR

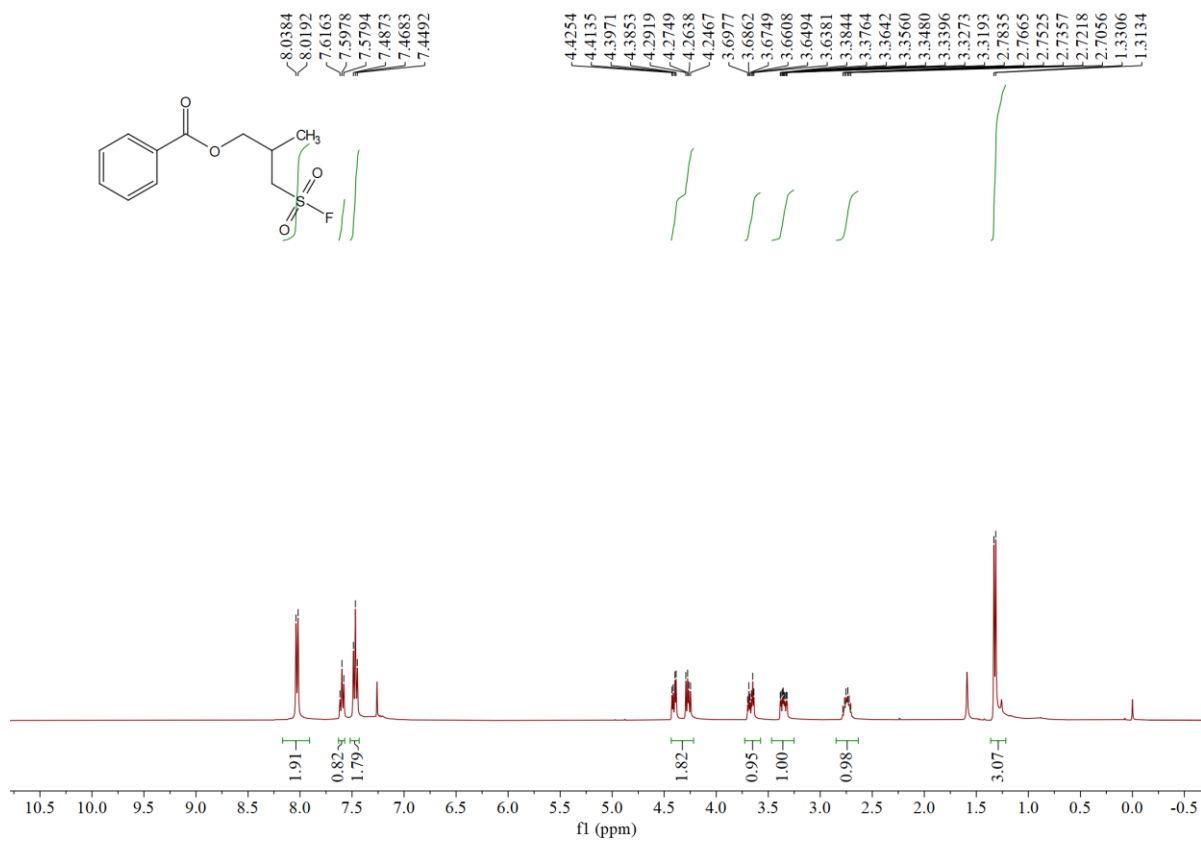

# <sup>13</sup>C NMR

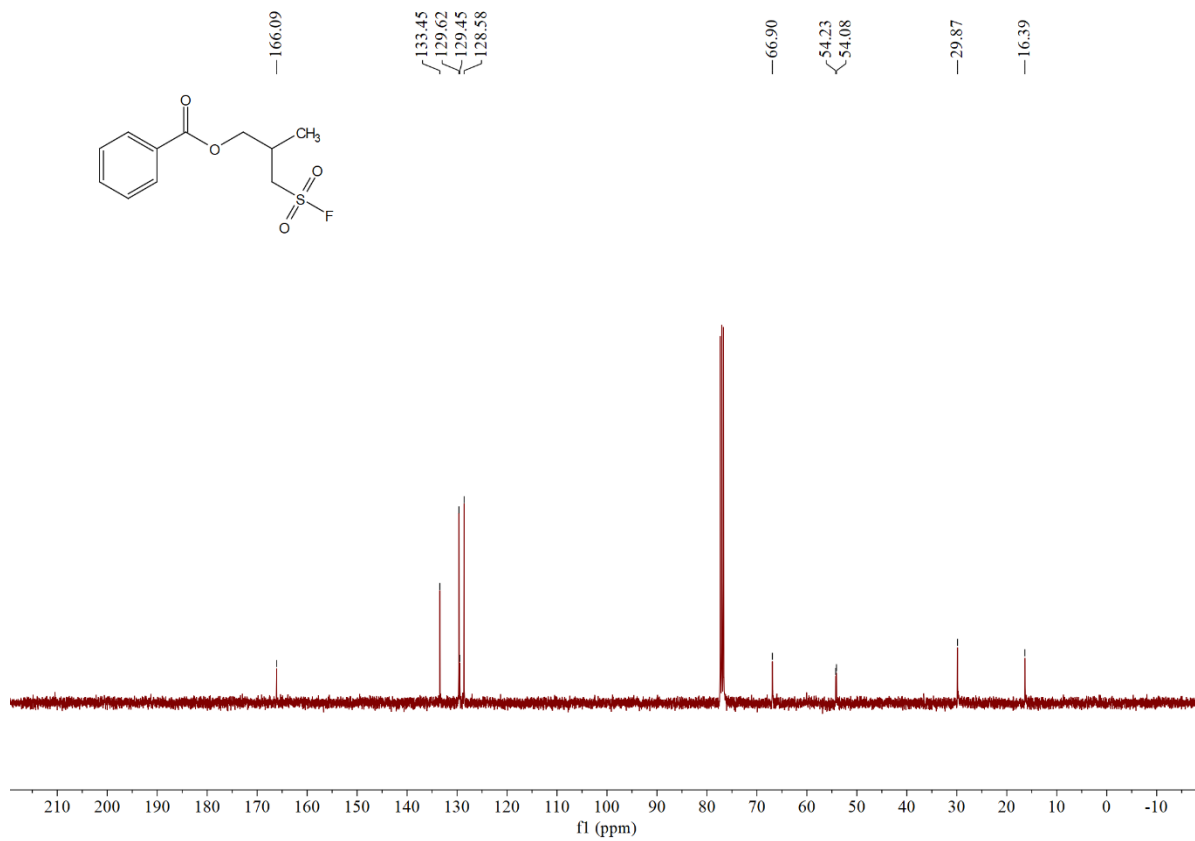

# <sup>19</sup>F NMR

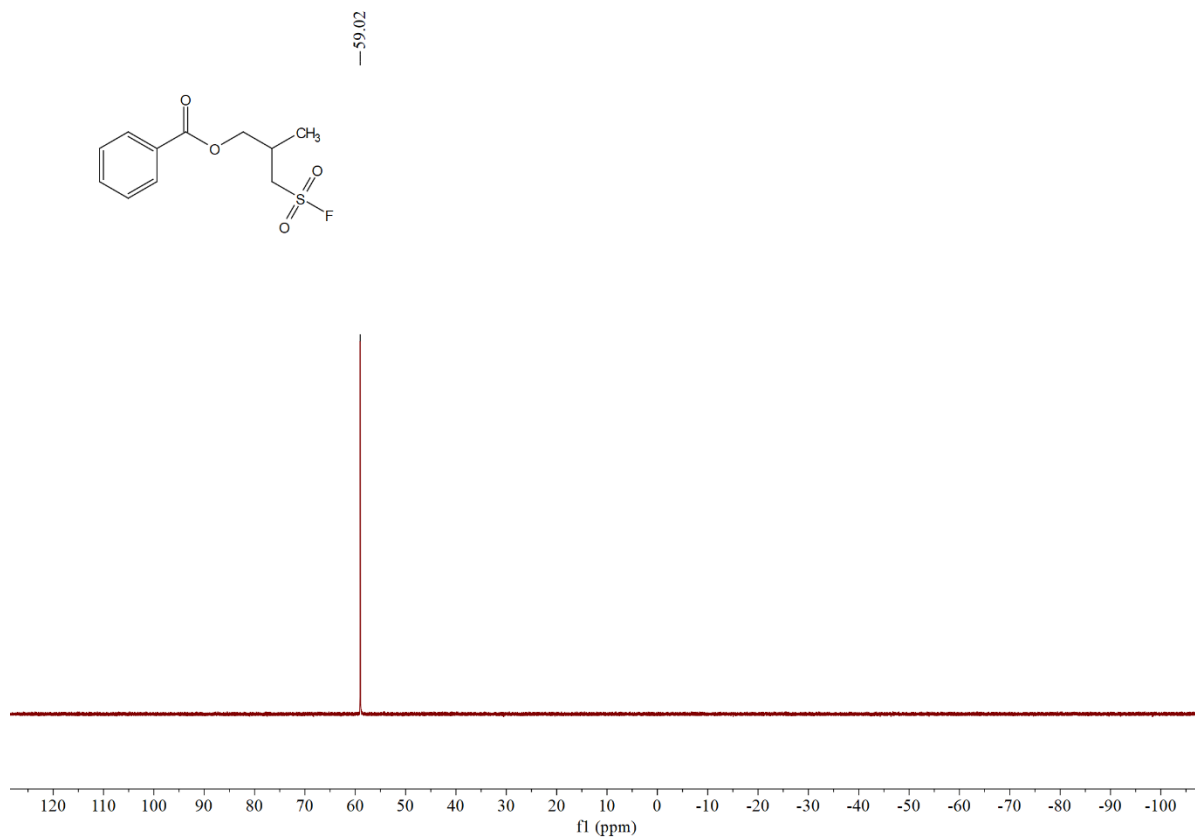

cyclohexylmethanesulfonyl fluoride (4af)

<sup>1</sup>H NMR

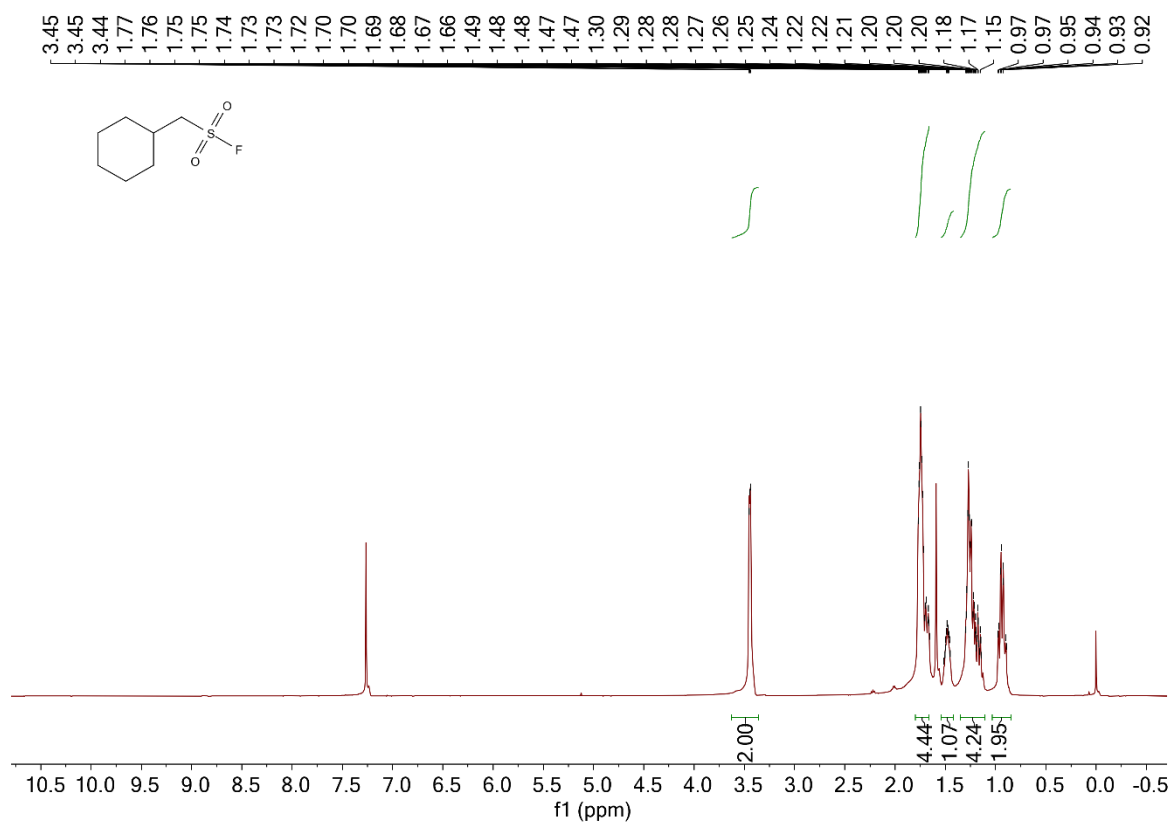

<sup>13</sup>C NMR

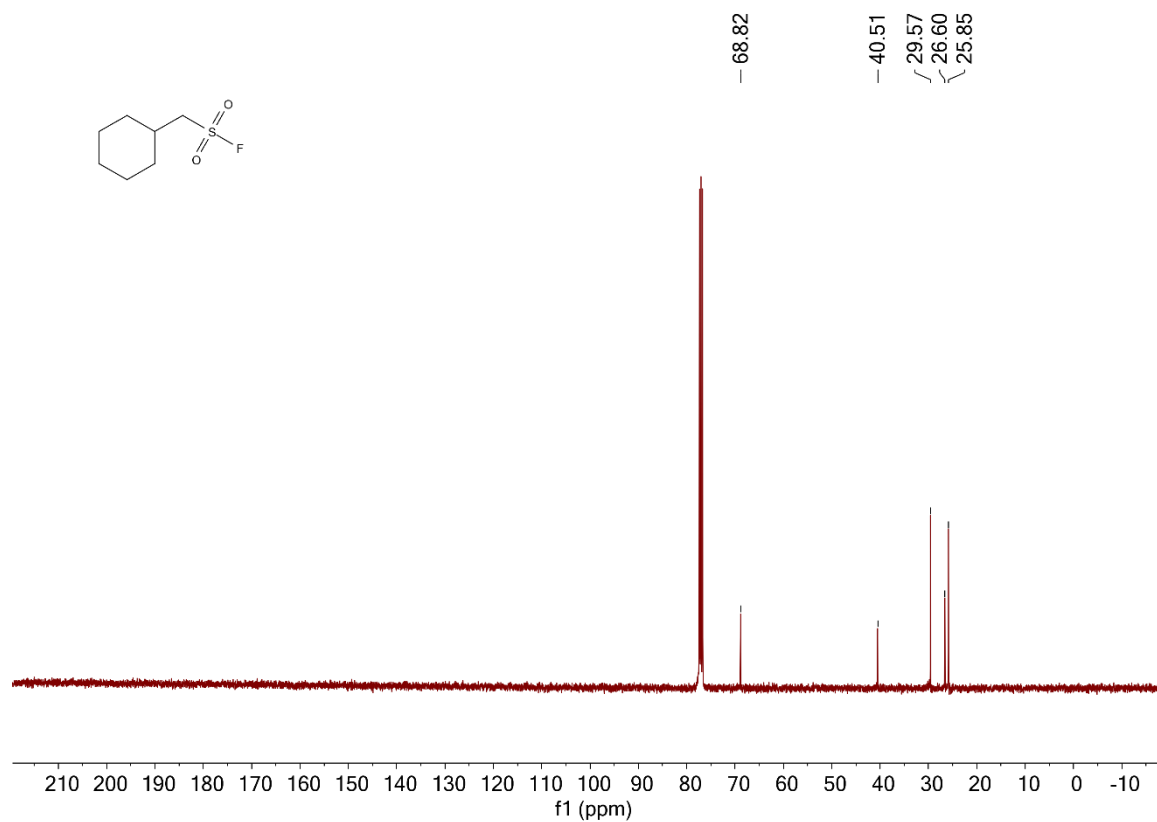

# <sup>19</sup>F NMR

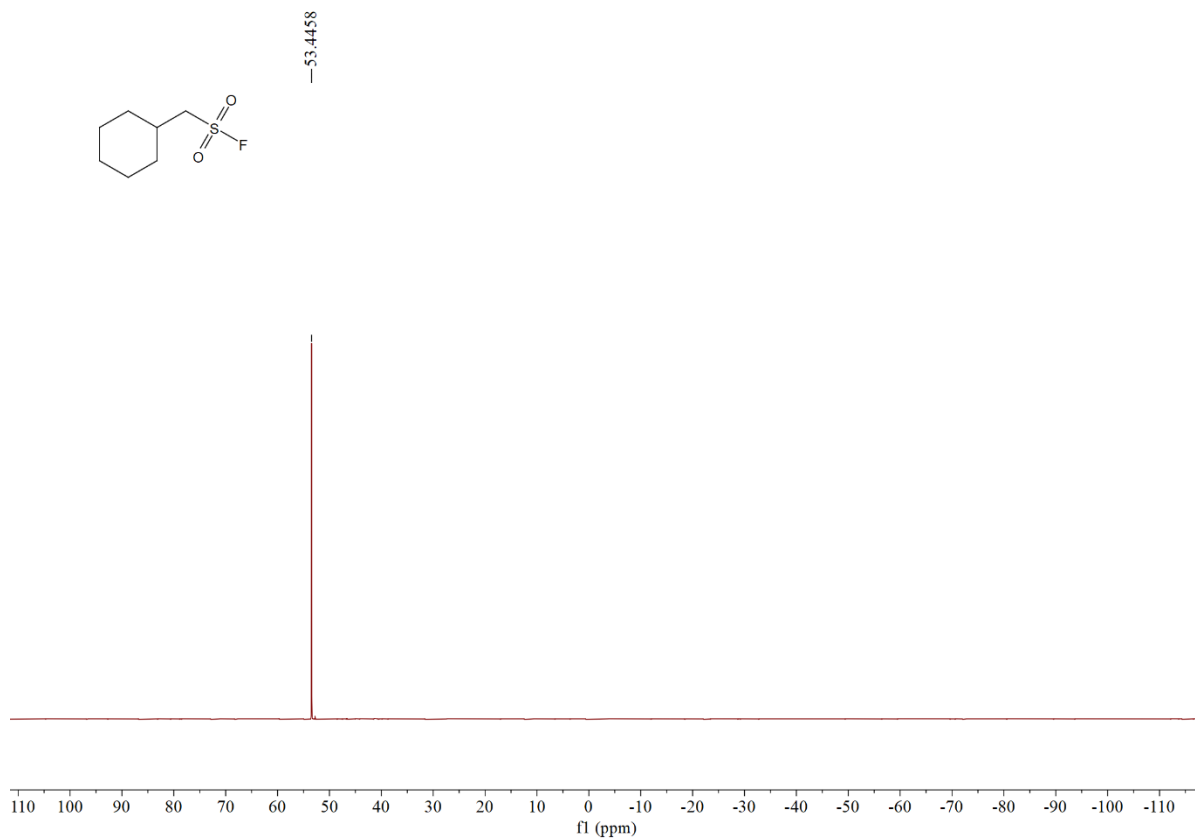

## (tetrahydro-2H-pyran-4-yl)methanesulfonyl fluoride (4ag)

### <sup>1</sup>H NMR

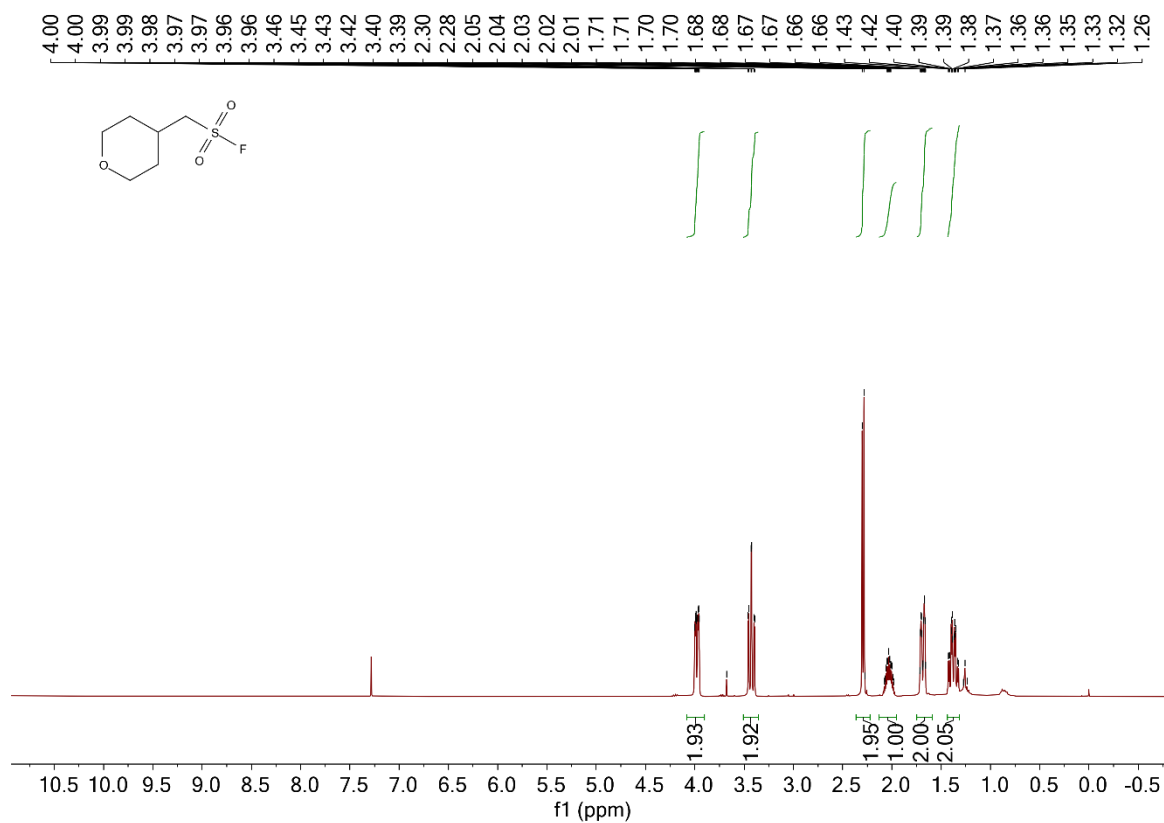



# <sup>13</sup>C NMR

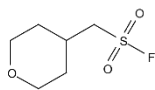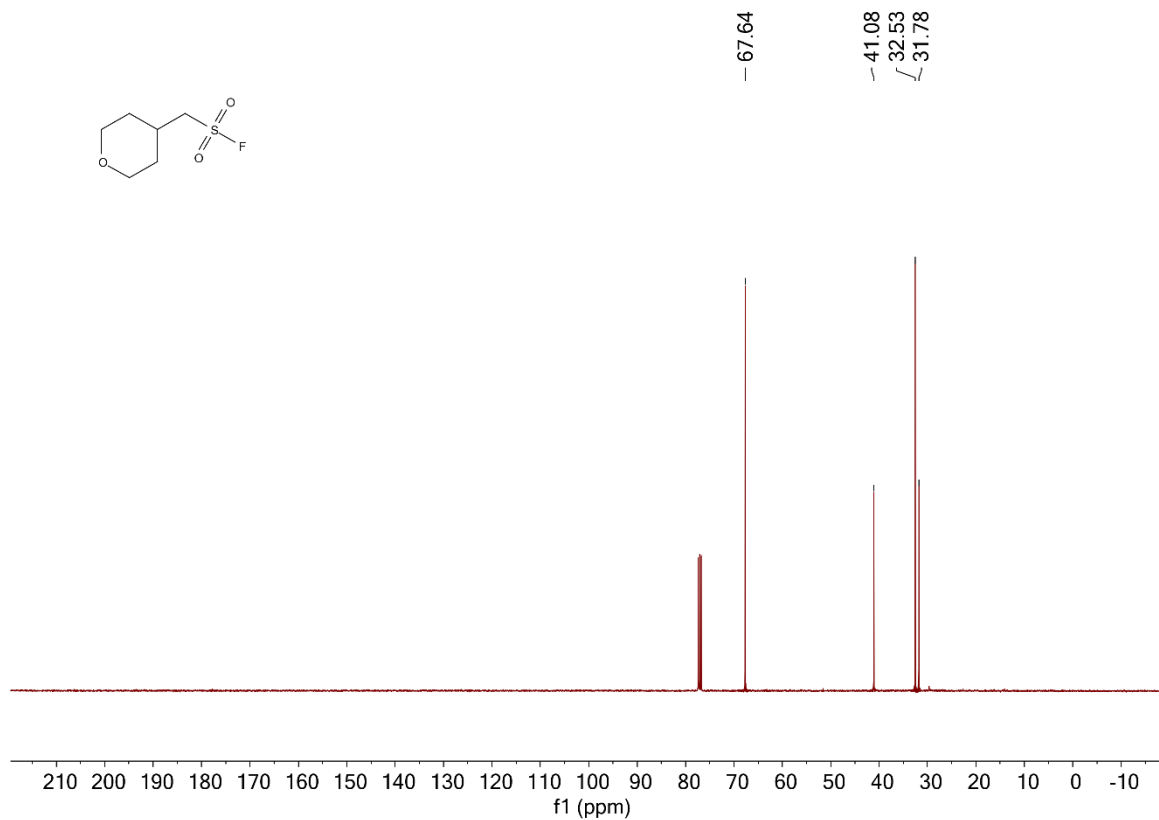

# <sup>19</sup>F NMR

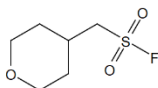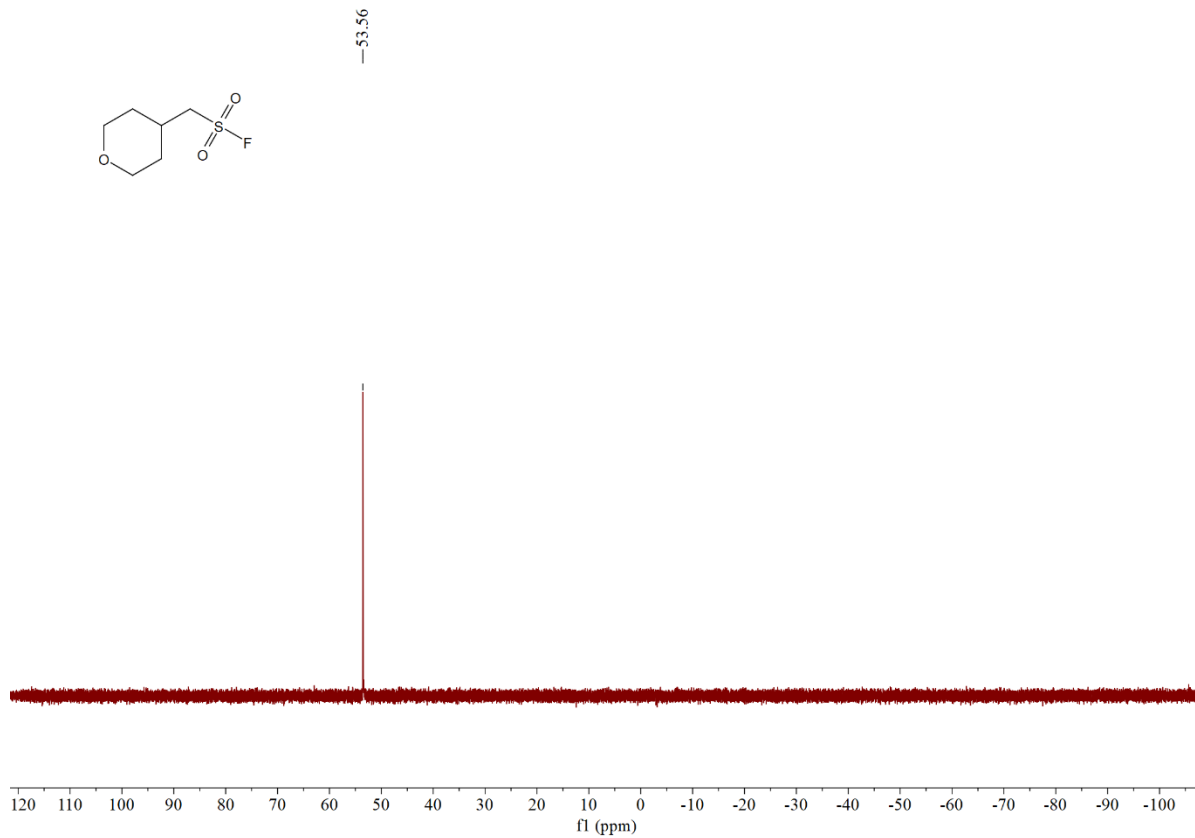

(8*S*,9*R*,13*R*)-13-methyl-17-oxo-7,8,9,11,12,13,14,15,16,17-decahydro-6*H*-cyclopenta[*a*]phenanthren-3-yl 5-(fluorosulfonyl)pentanoate (**4ah**)

<sup>1</sup>H NMR

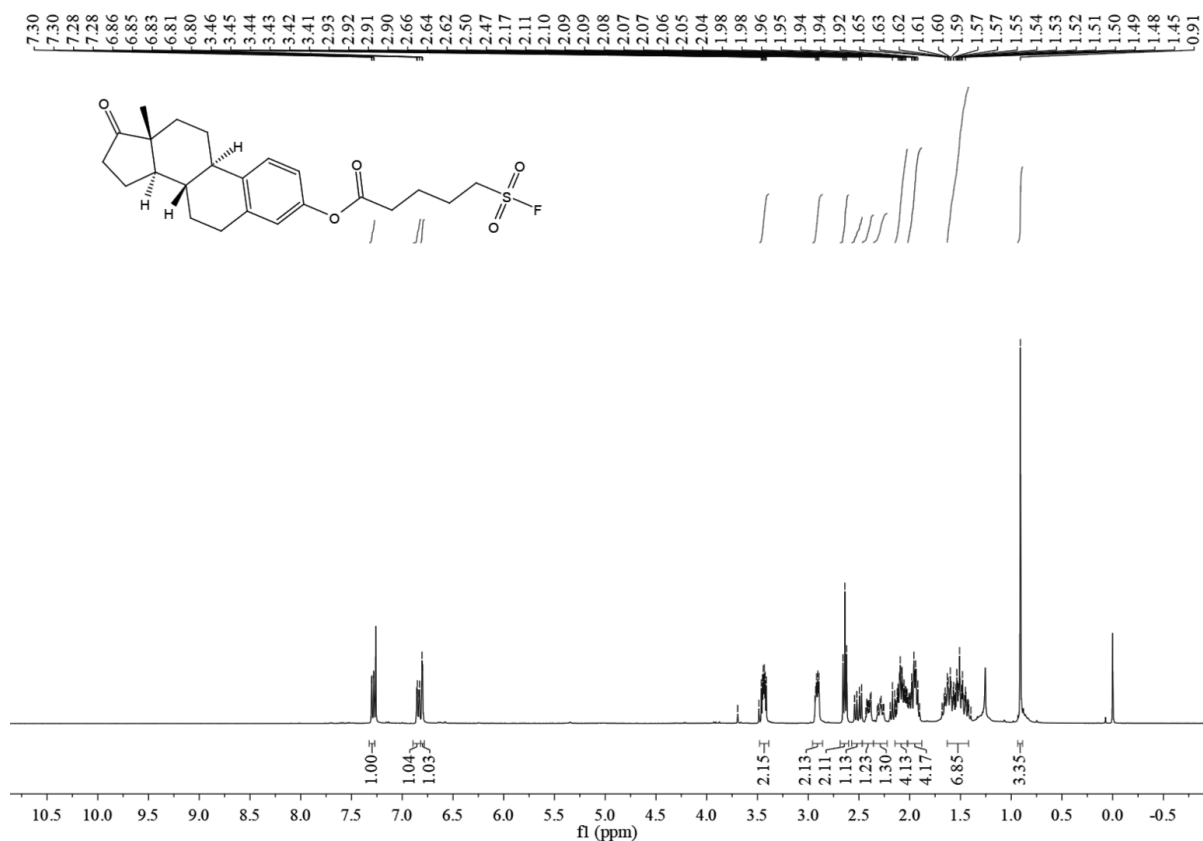

<sup>13</sup>C NMR

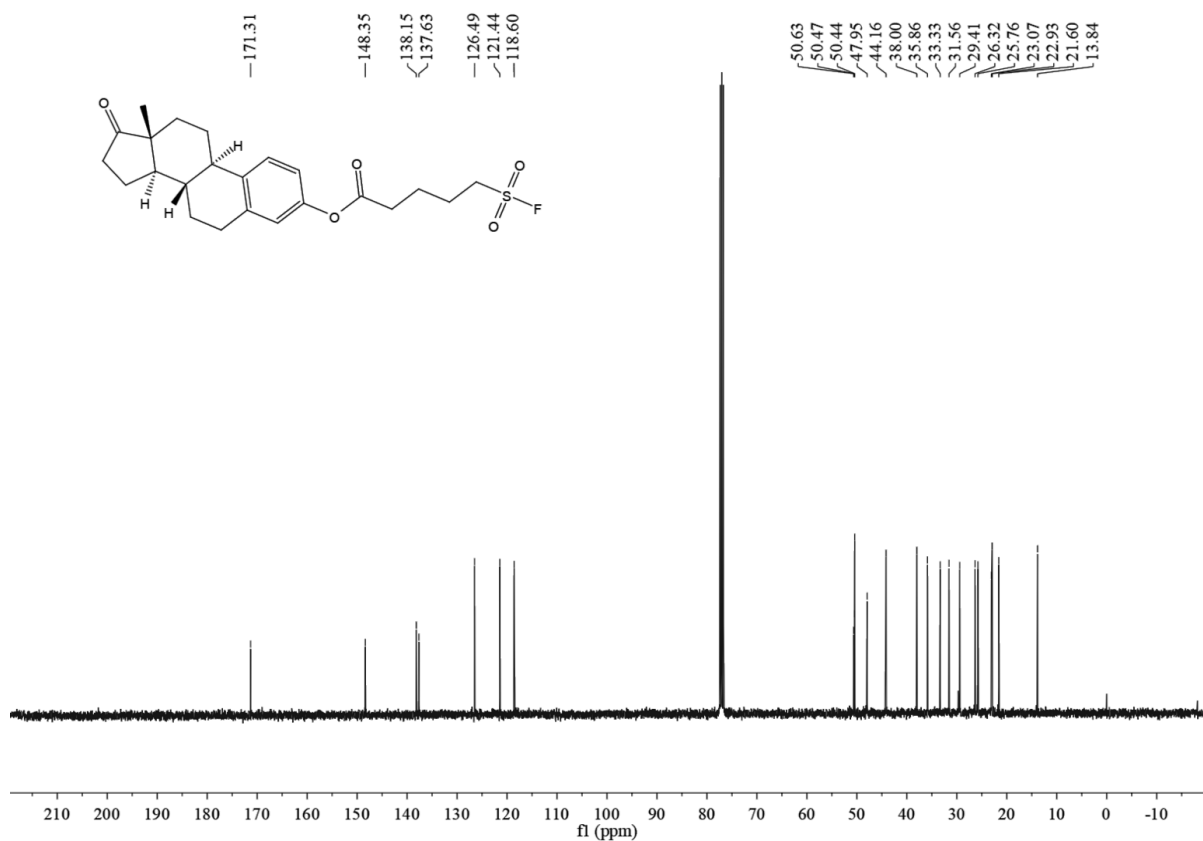

# <sup>19</sup>F NMR

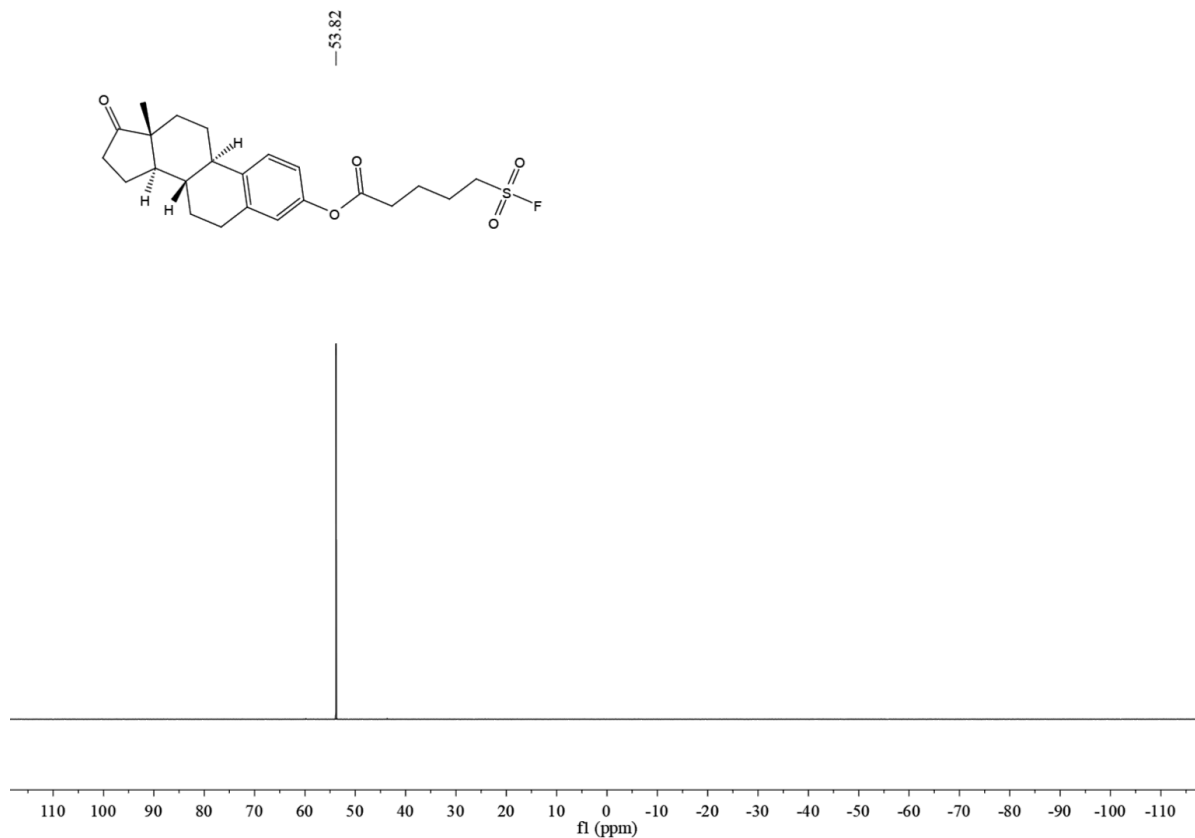

## (1*S*,2*S*)-2-isopropyl-5-methylcyclohexyl 5-(fluorosulfonyl)pentanoate (**4ai**)

### <sup>1</sup>H NMR

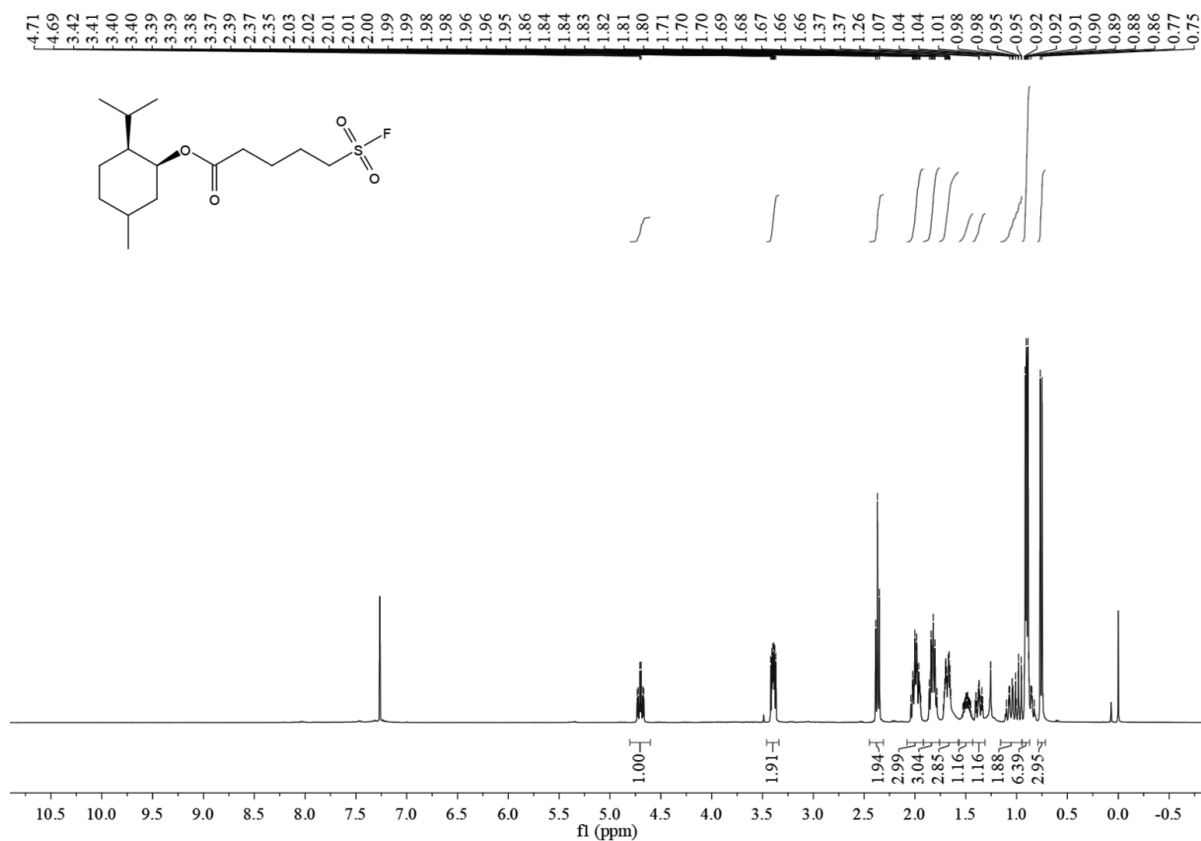

# <sup>13</sup>C NMR

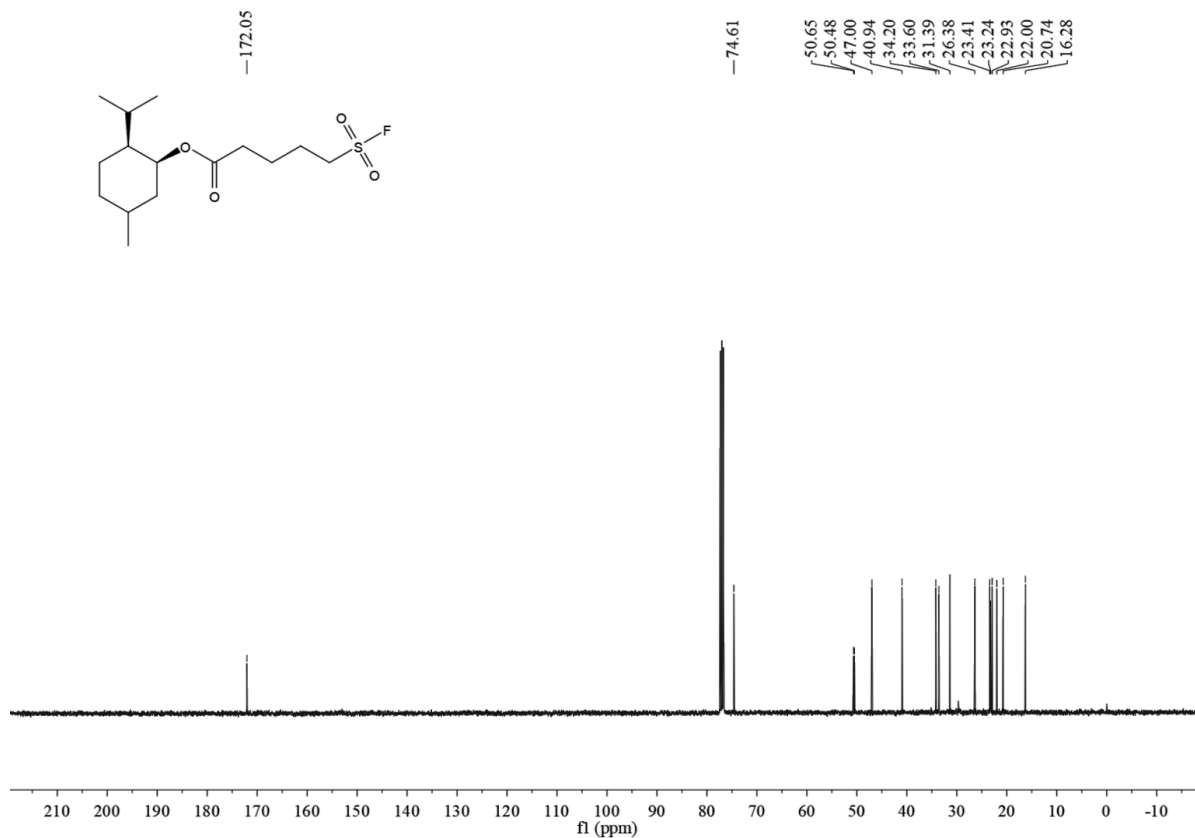

# <sup>19</sup>F NMR

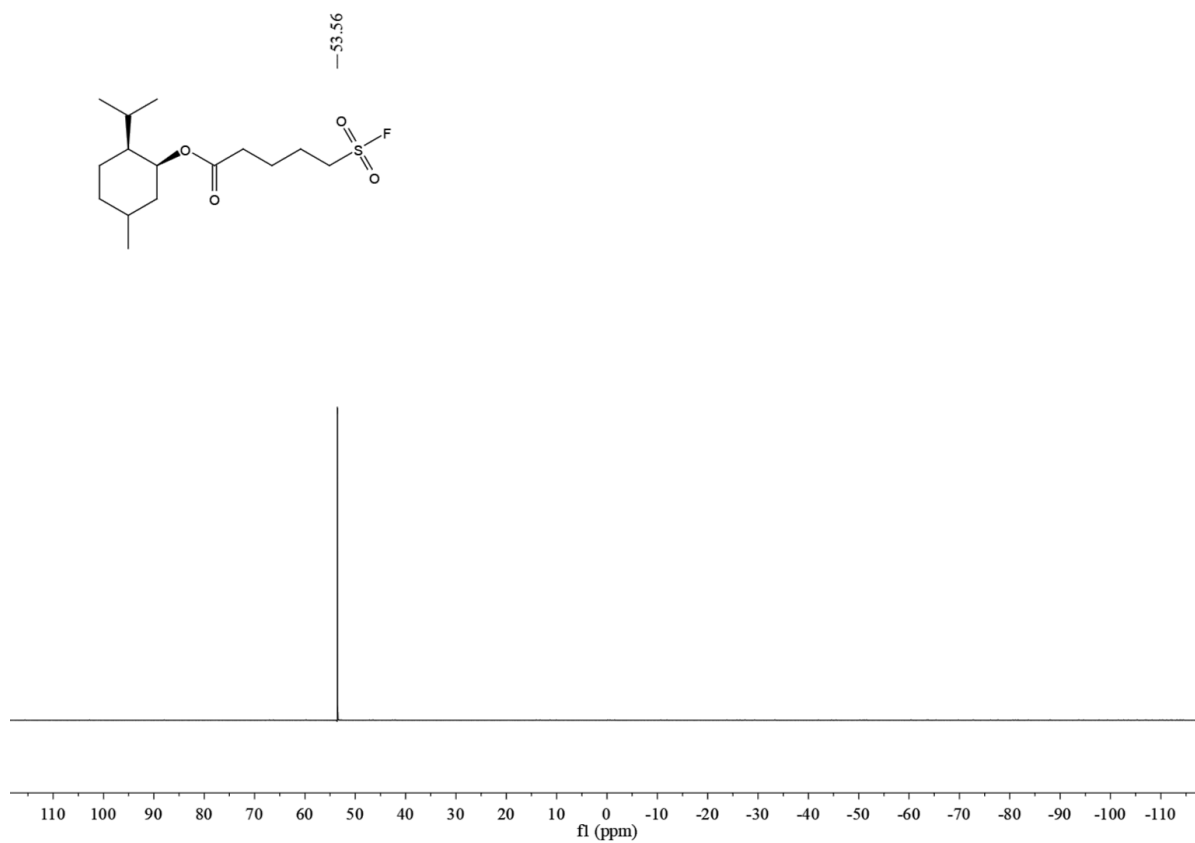

5-(fluorosulfonyl)pentyl 2-(4-isobutylphenyl)propanoate (**4aj**)

<sup>1</sup>H NMR

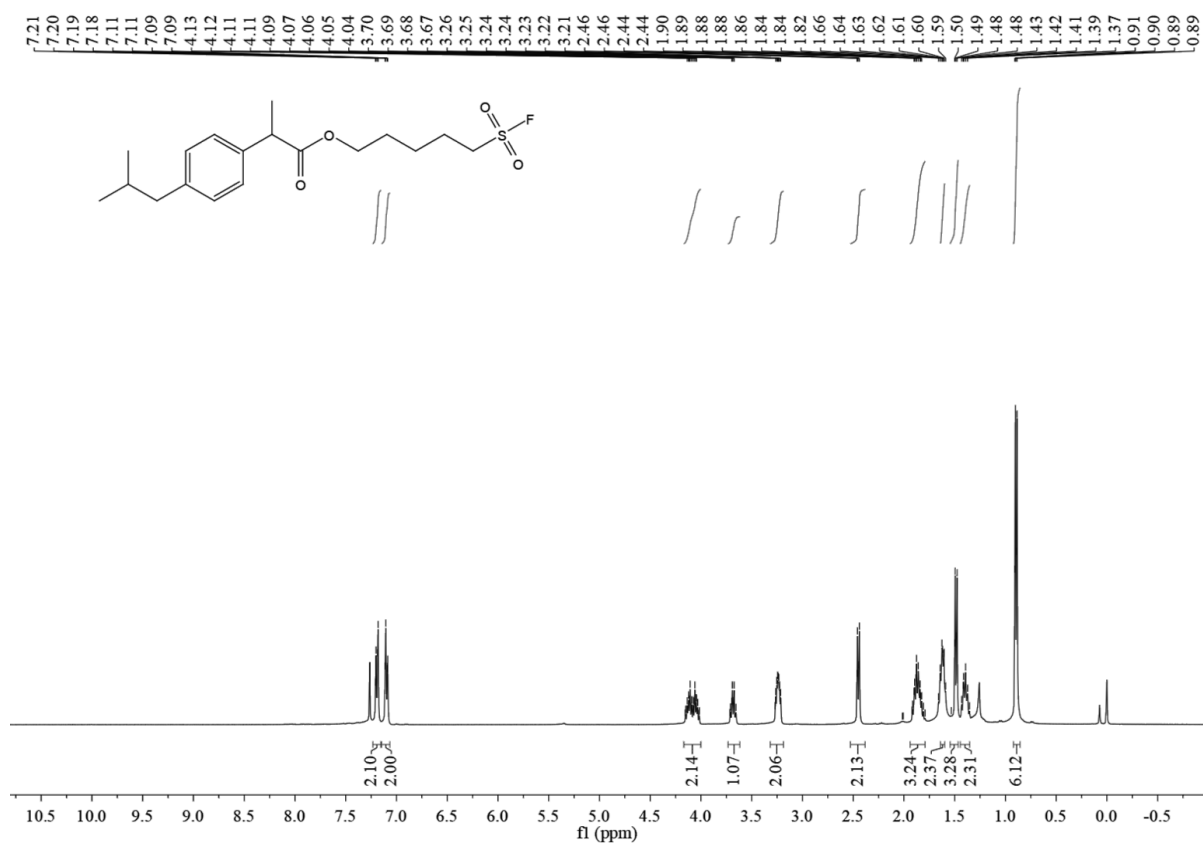

<sup>13</sup>C NMR

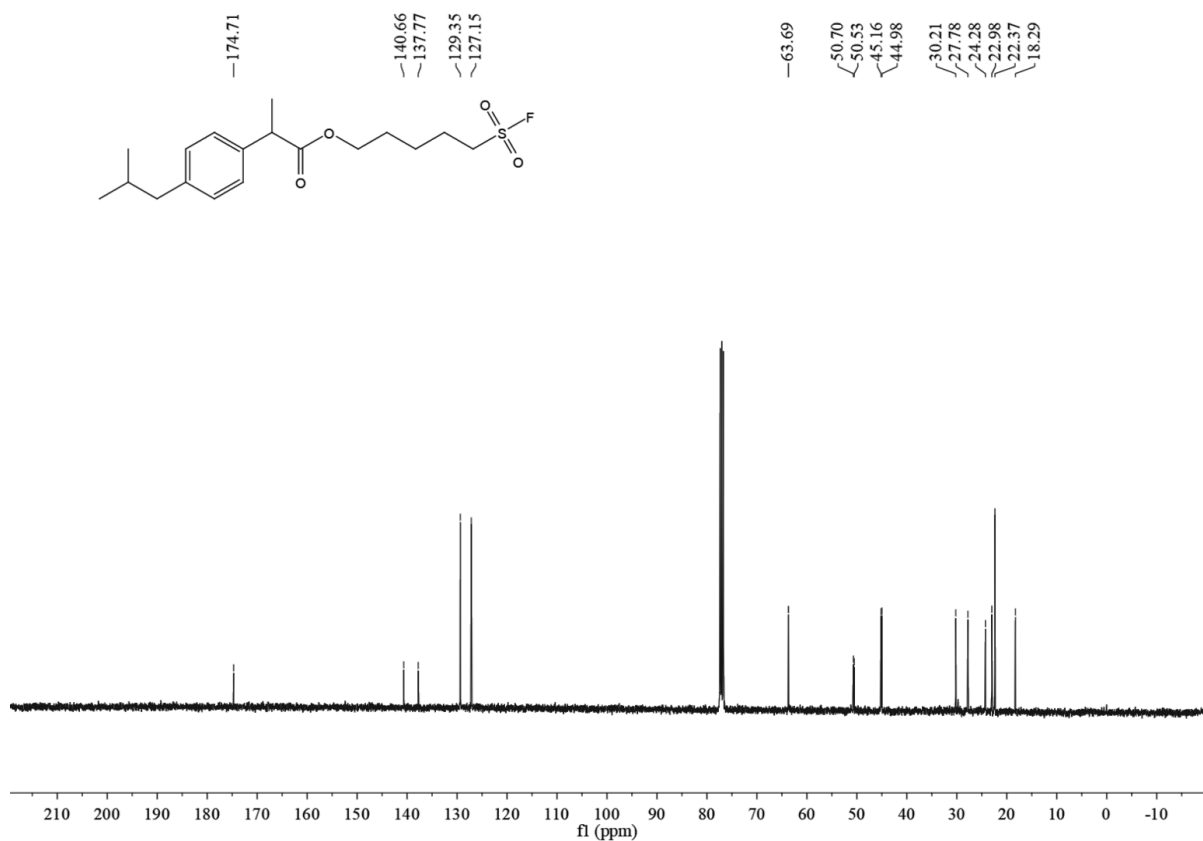

# <sup>19</sup>F NMR

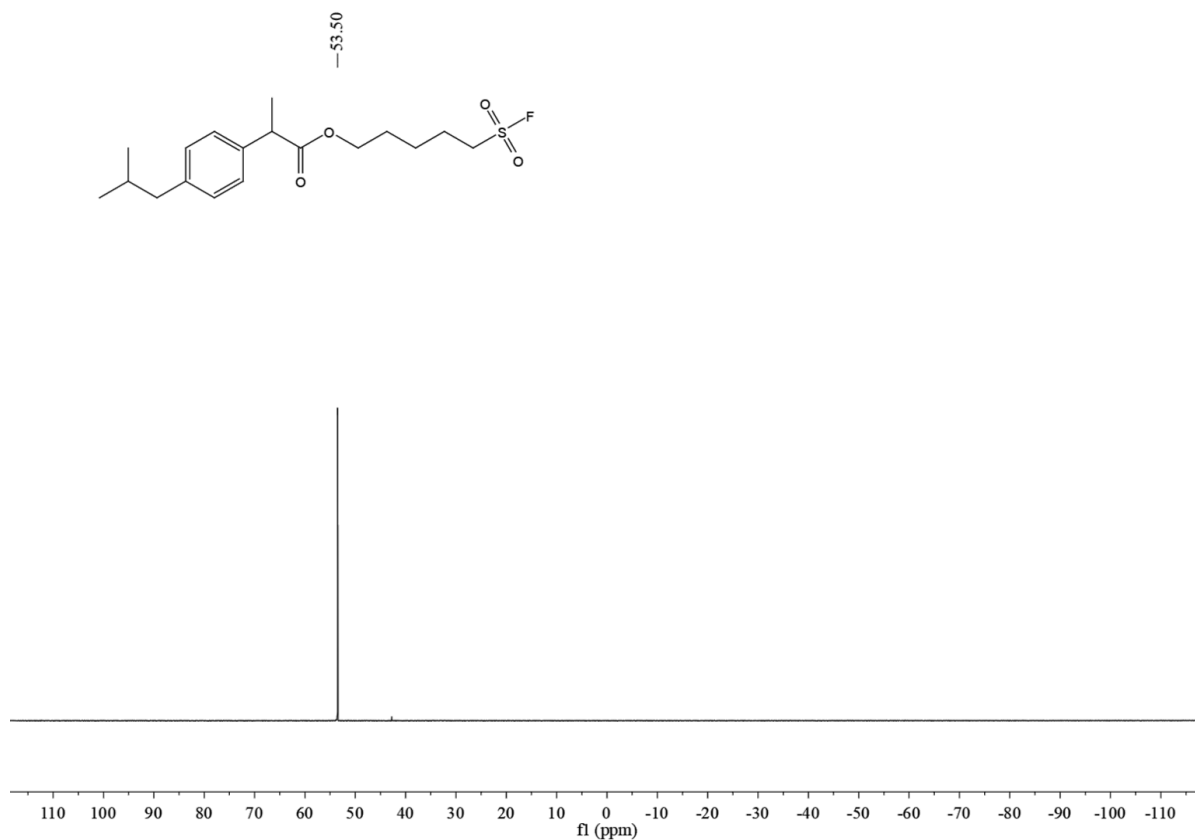

## 4-(fluorosulfonyl)butyl 2-(11-oxo-6,11-dihydrodibenzo[b,e]oxepin-2-yl)acetate (4ak)

### <sup>1</sup>H NMR

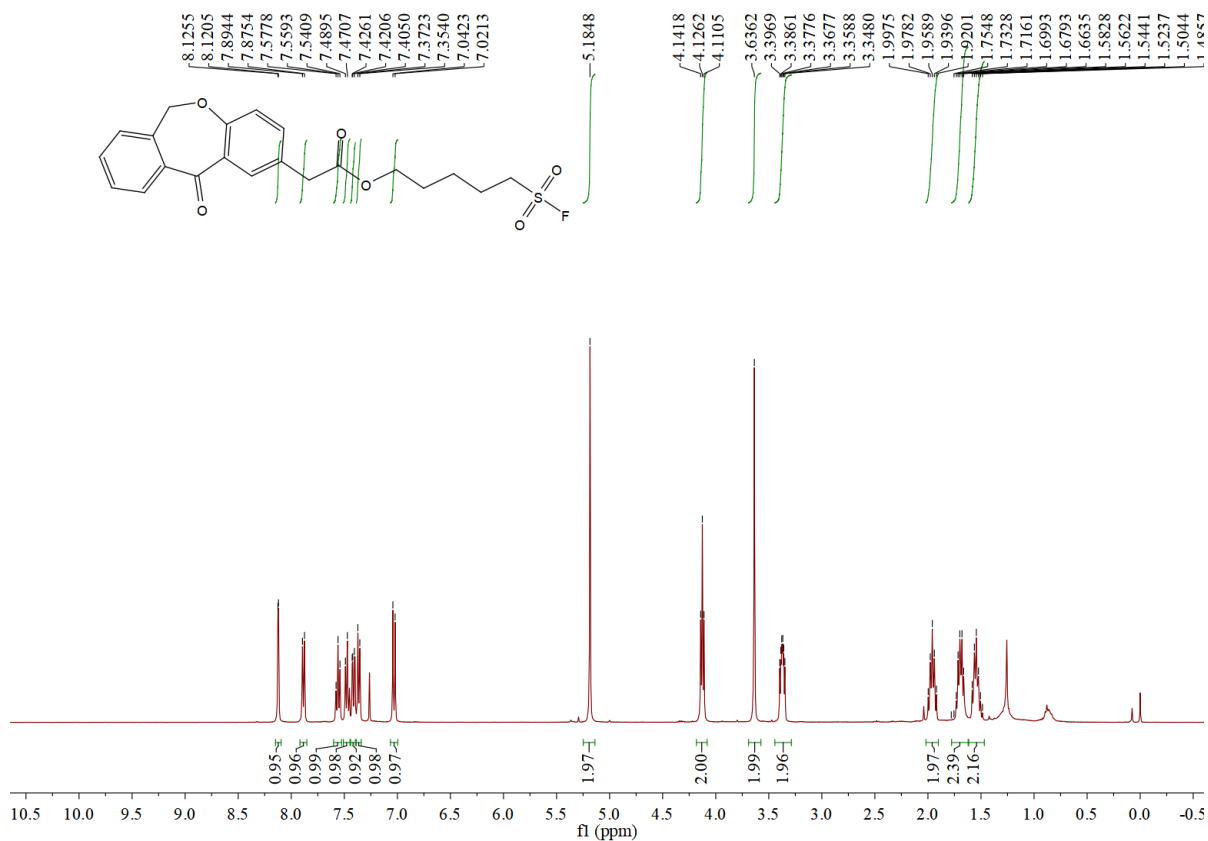

### <sup>13</sup>C NMR

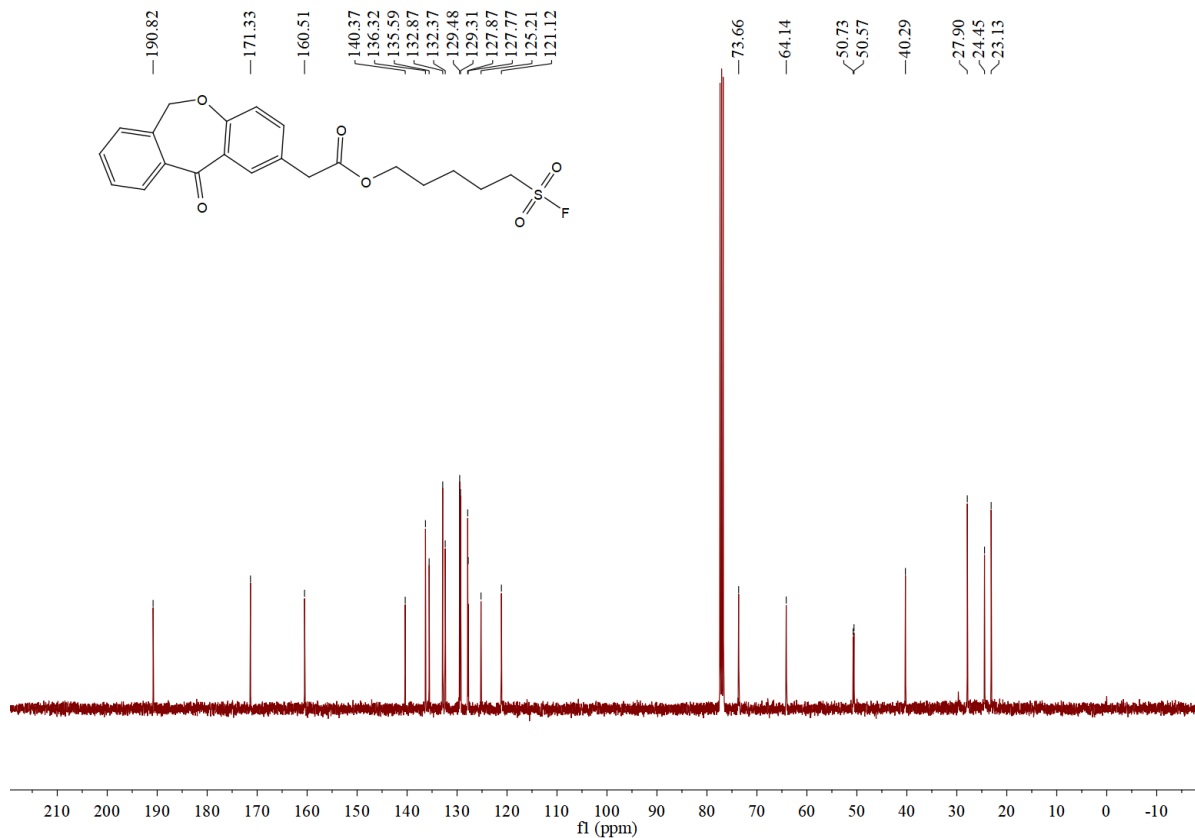

### <sup>19</sup>F NMR

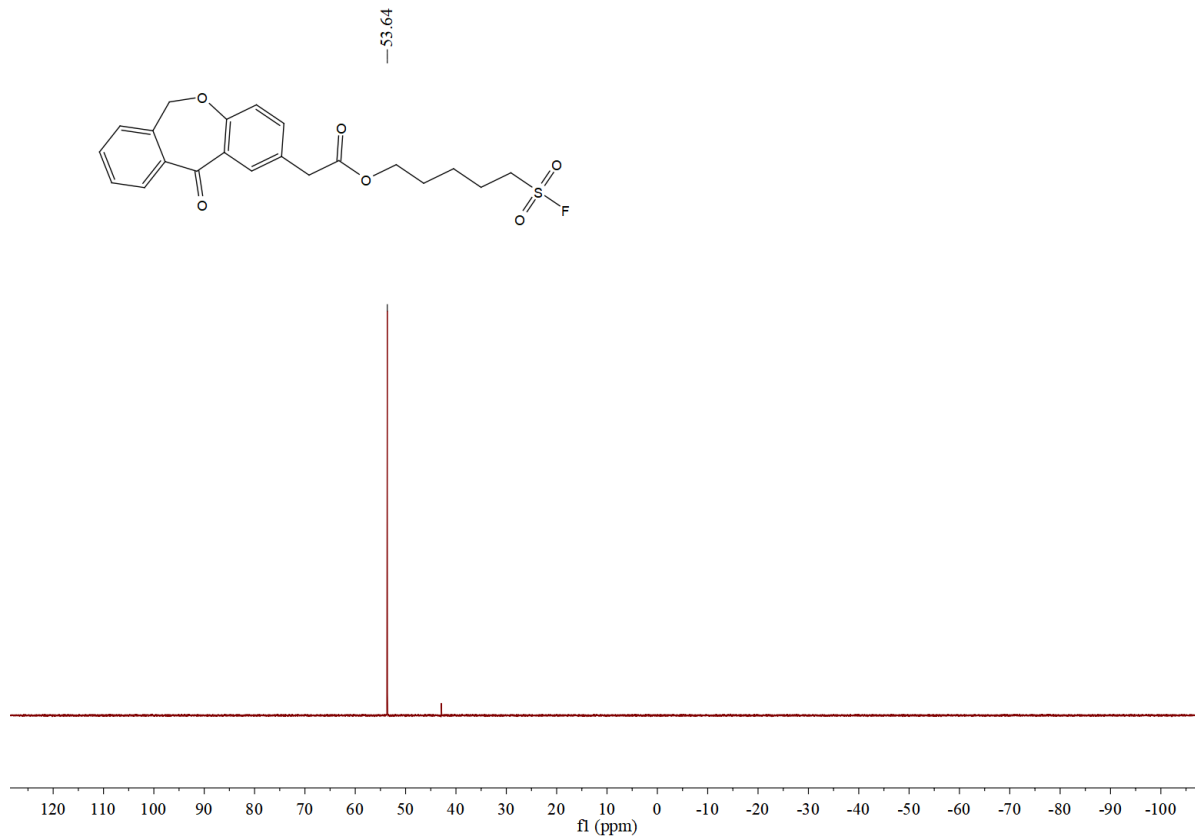

2-(((3*S*,8*S*,9*S*,10*R*,13*R*,14*S*,17*R*)-10,13-dimethyl-17-((*R*)-6-methylheptan-2-yl)-2,3,4,7,8,9,10,11,12,13,14,15,16,17-tetradecahydro-1*H*-cyclopenta[*a*]phenanthren-3-yl)oxy)ethane-1-sulfonyl fluoride (**4al**)

<sup>1</sup>H NMR

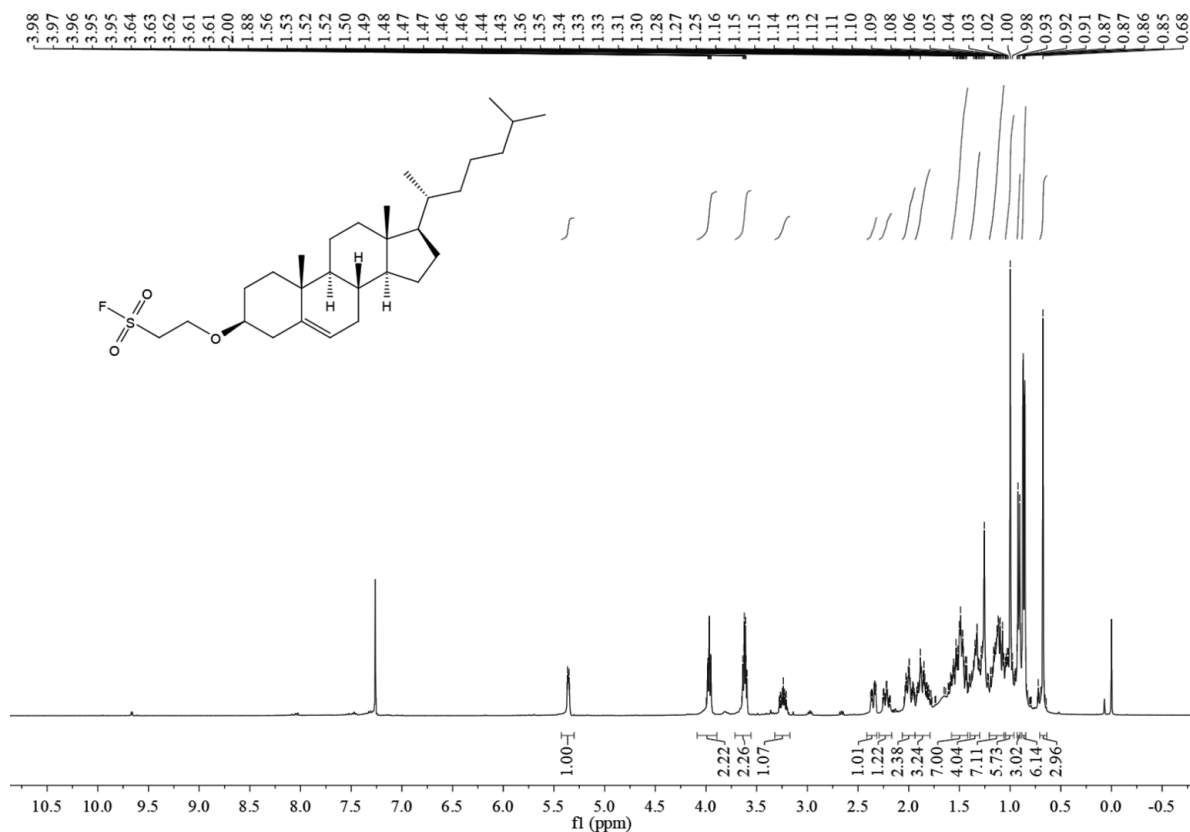

<sup>13</sup>C NMR

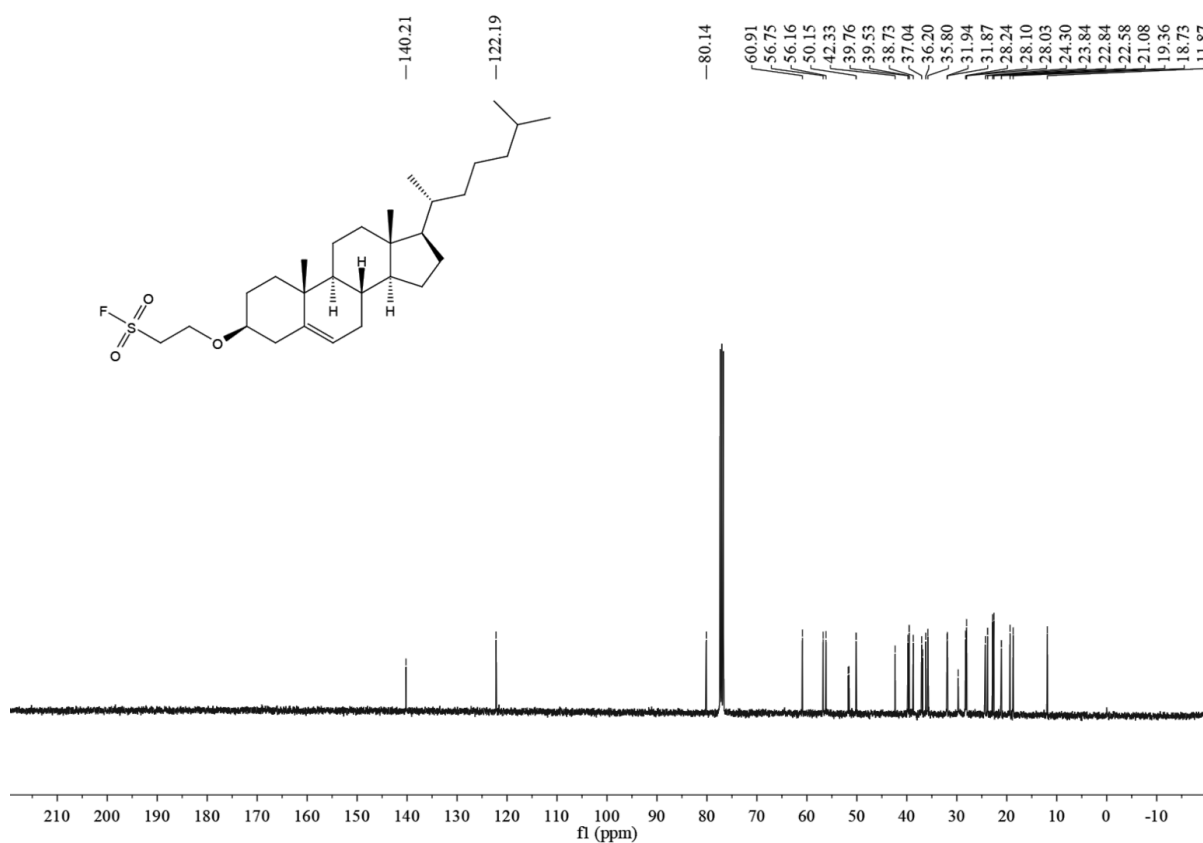



# <sup>19</sup>F NMR

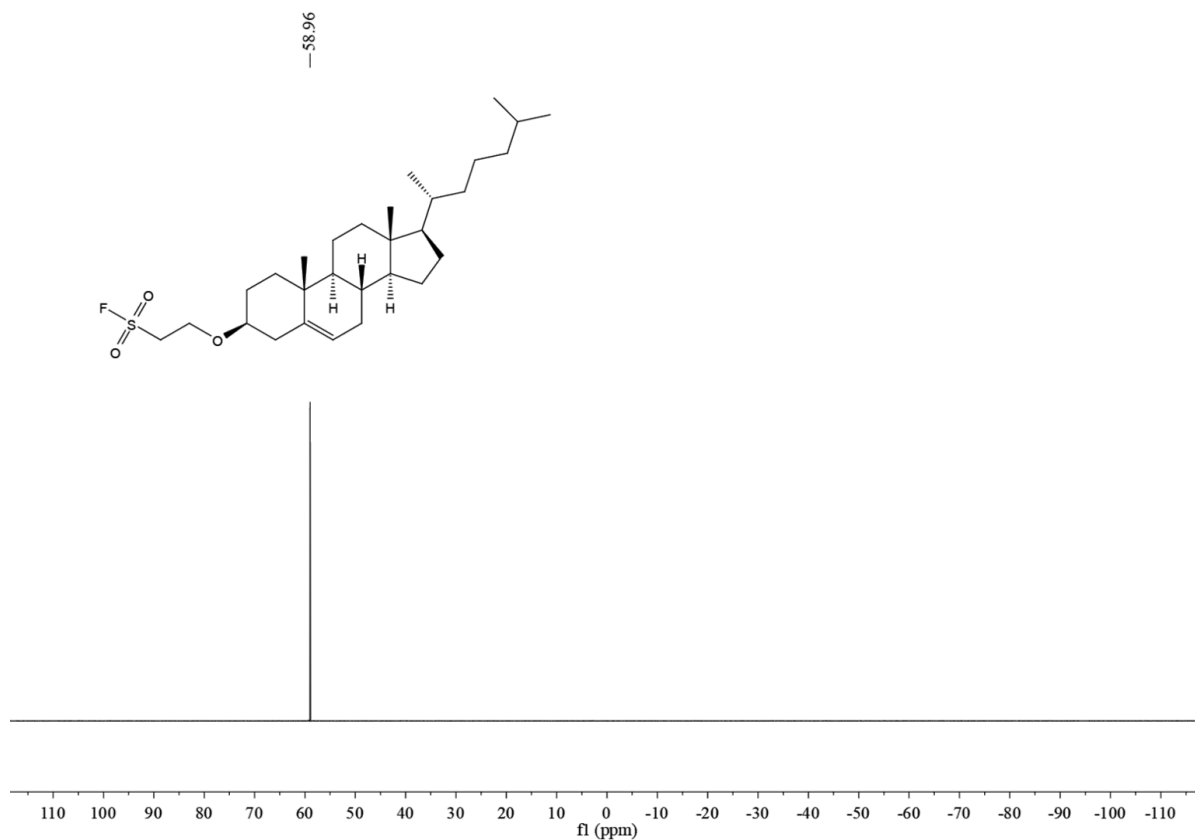

# 2-(3-(phenylsulfonyl)propyl)isoindoline-1,3-dione (6)

## <sup>1</sup>H NMR

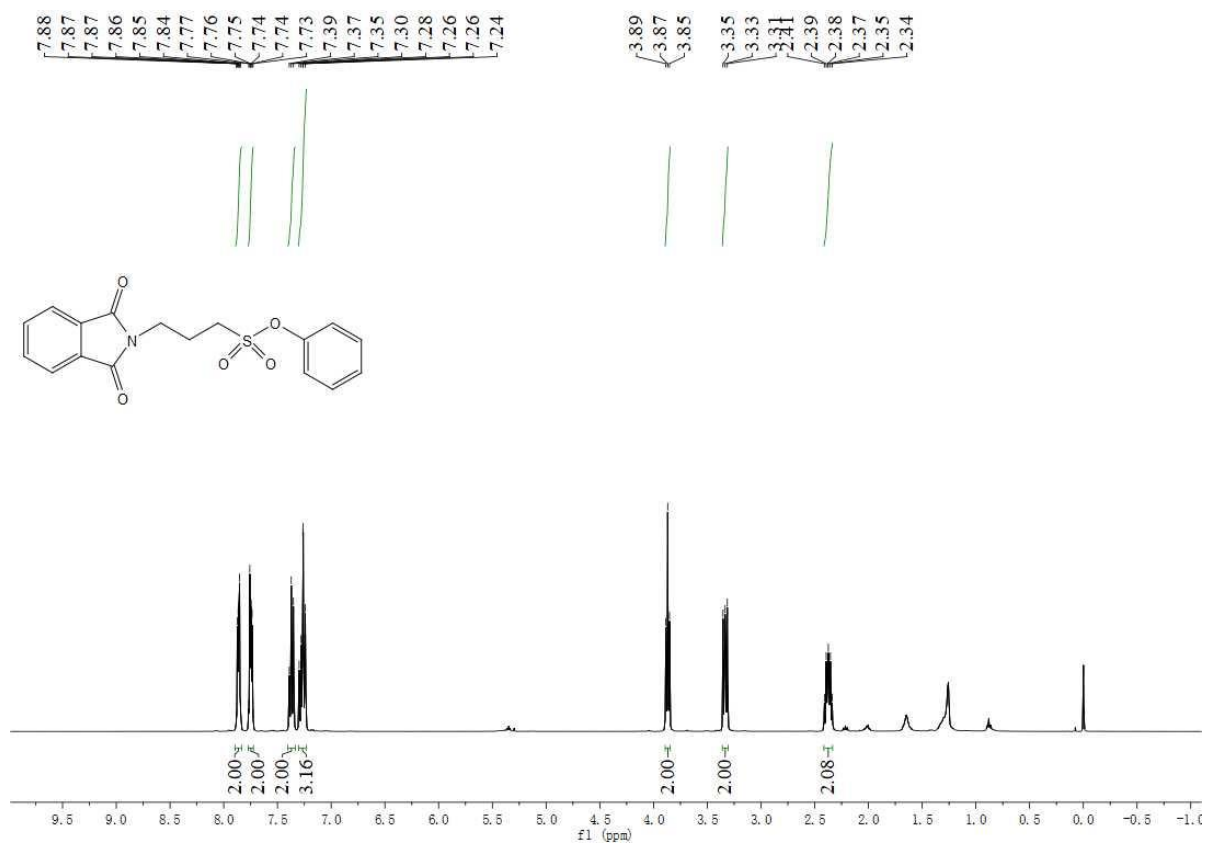

# <sup>13</sup>C NMR

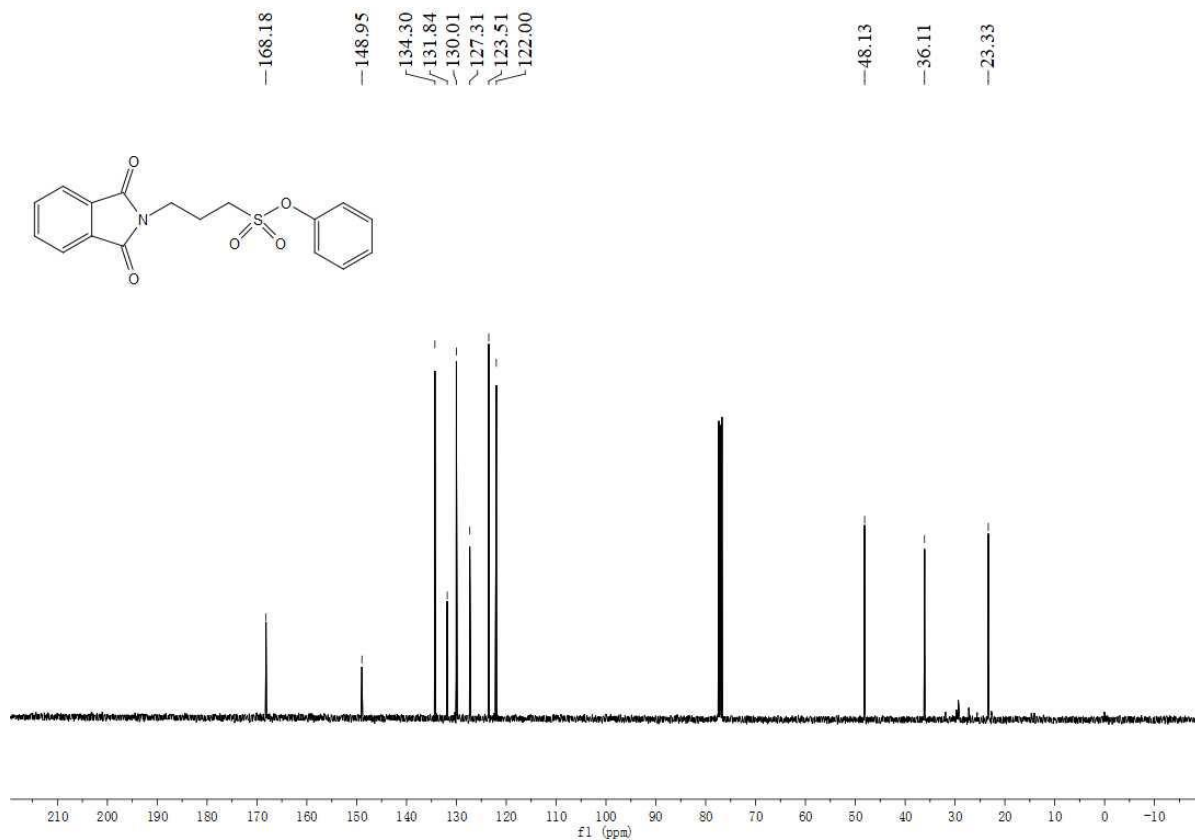

## 2-(3-(morpholinosulfonyl)propyl)isoindoline-1,3-dione (**8**)

### <sup>1</sup>H NMR

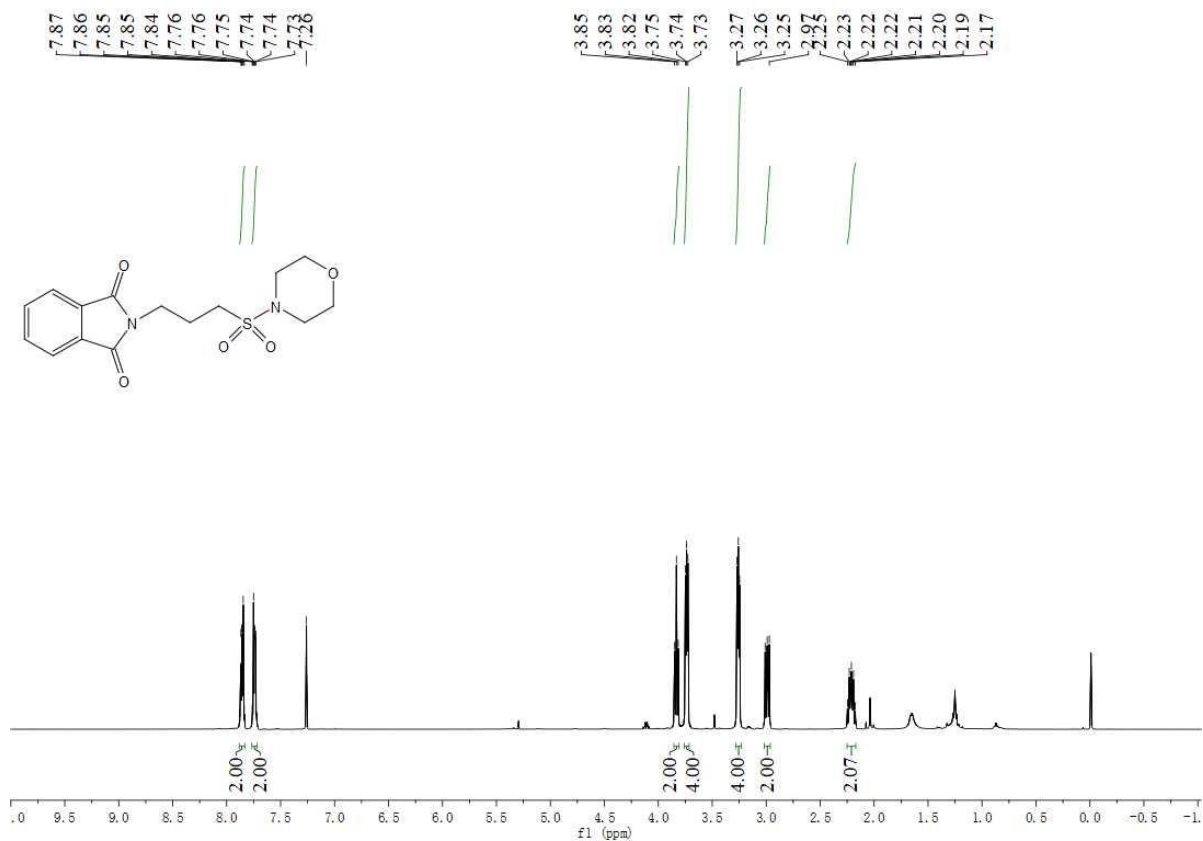

# <sup>13</sup>C NMR

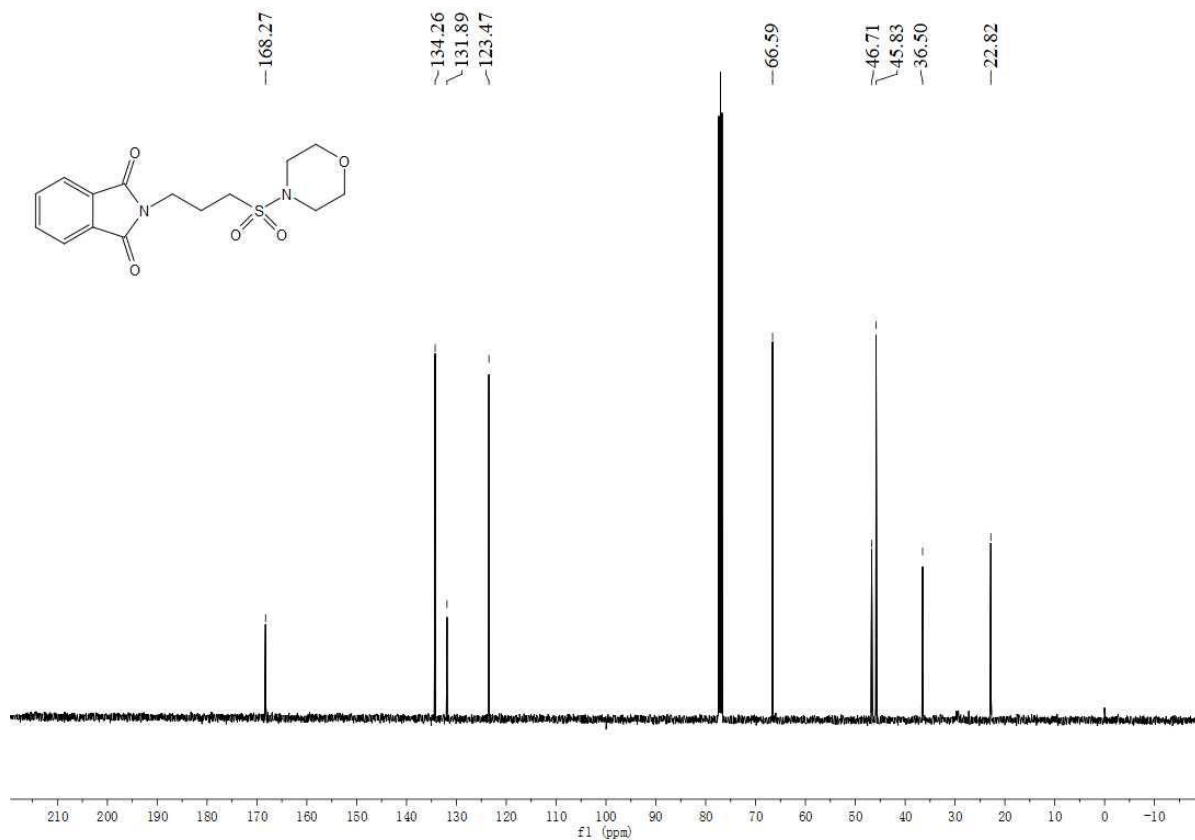

## 3-(1,3-dioxisoindolin-2-yl)propane-1-sulfonamide (10)

### <sup>1</sup>H NMR

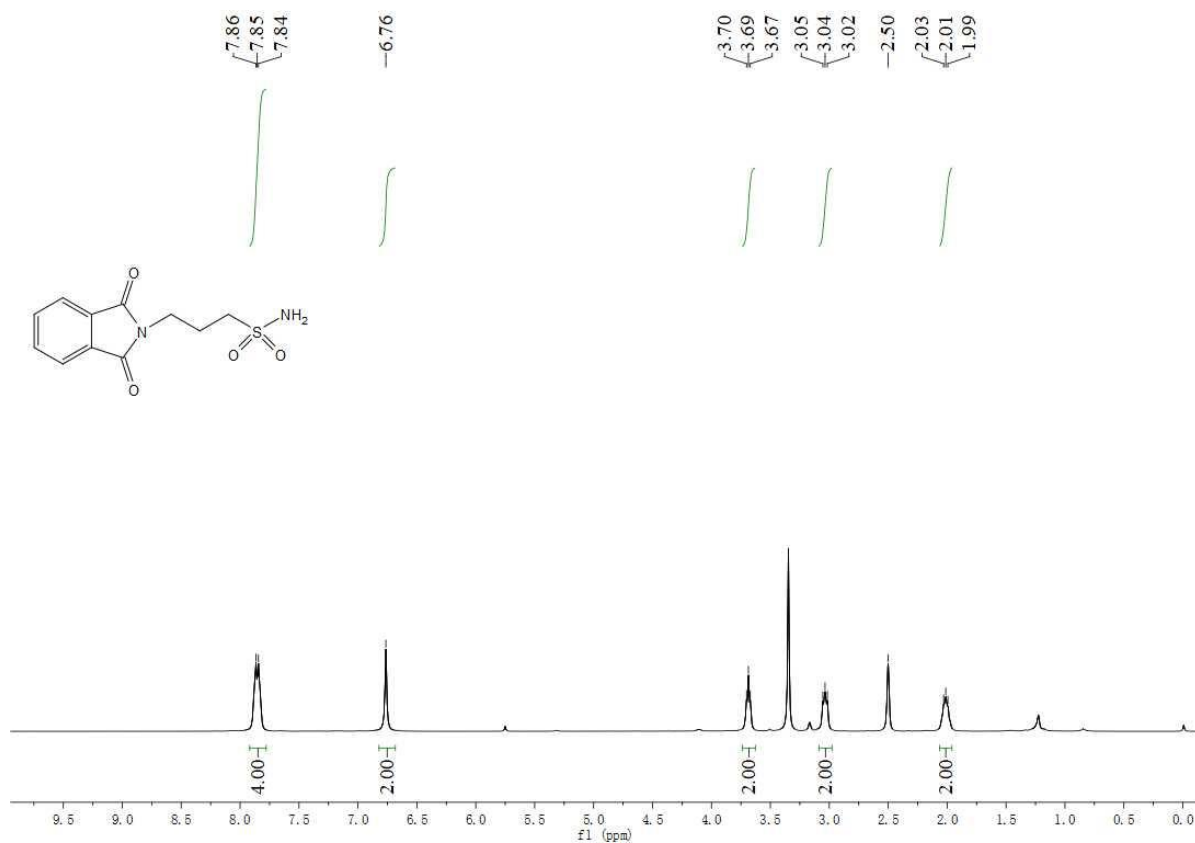

# <sup>13</sup>C NMR

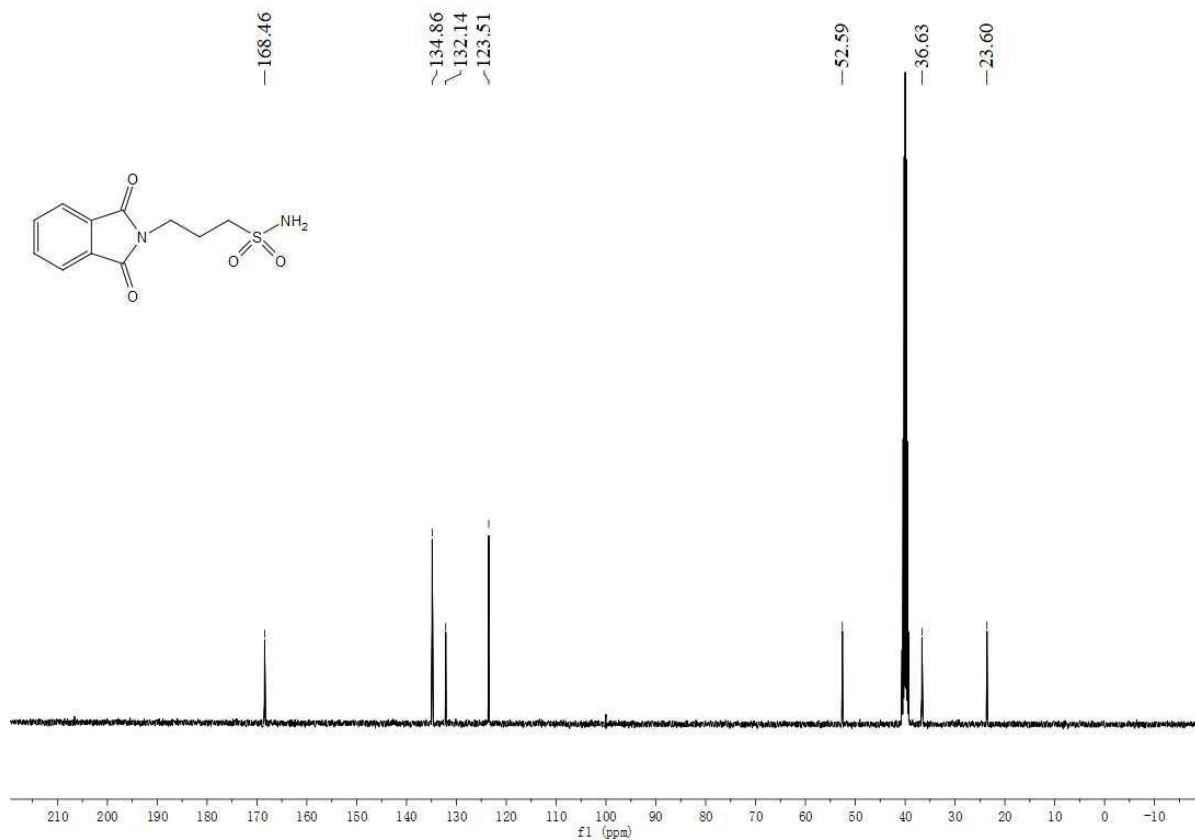

## 3-(1,3-dioxisoindolin-2-yl)propane-1-sulfonyl azide (12)

### <sup>1</sup>H NMR

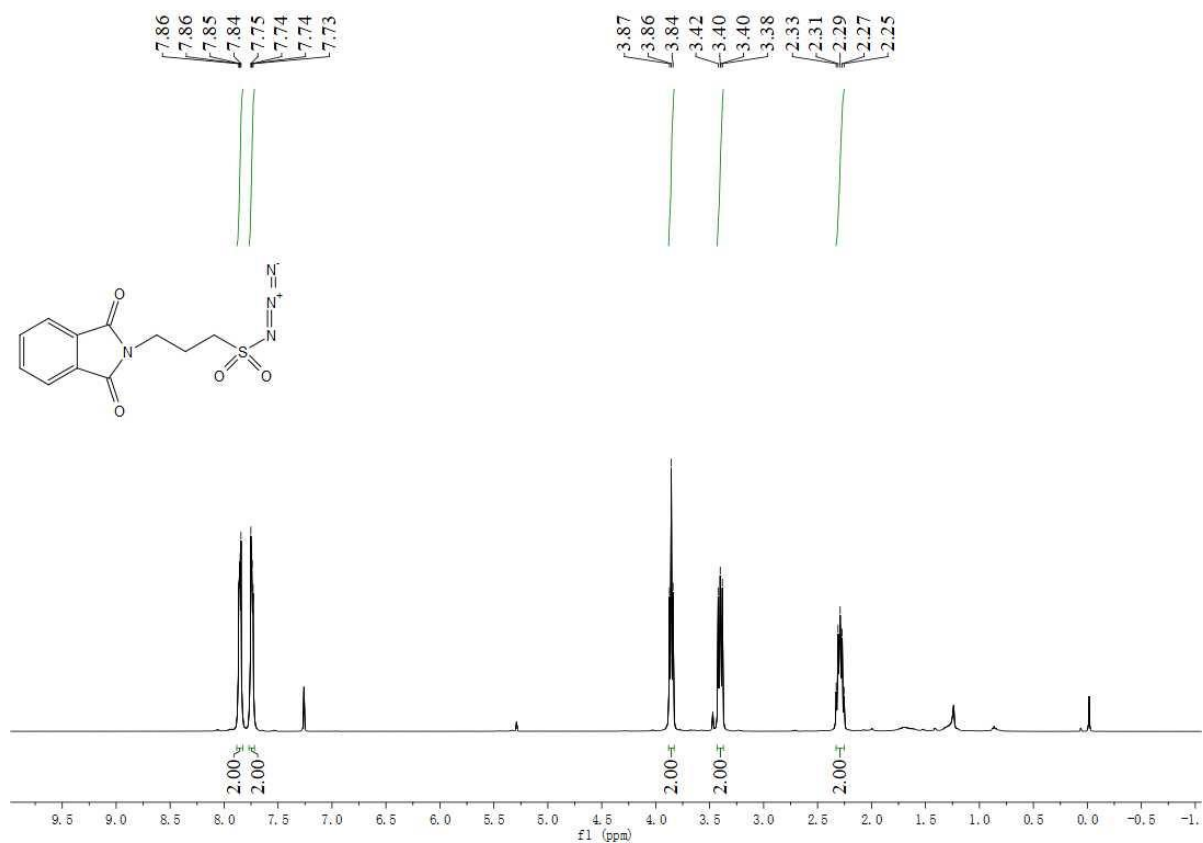

# <sup>13</sup>C NMR

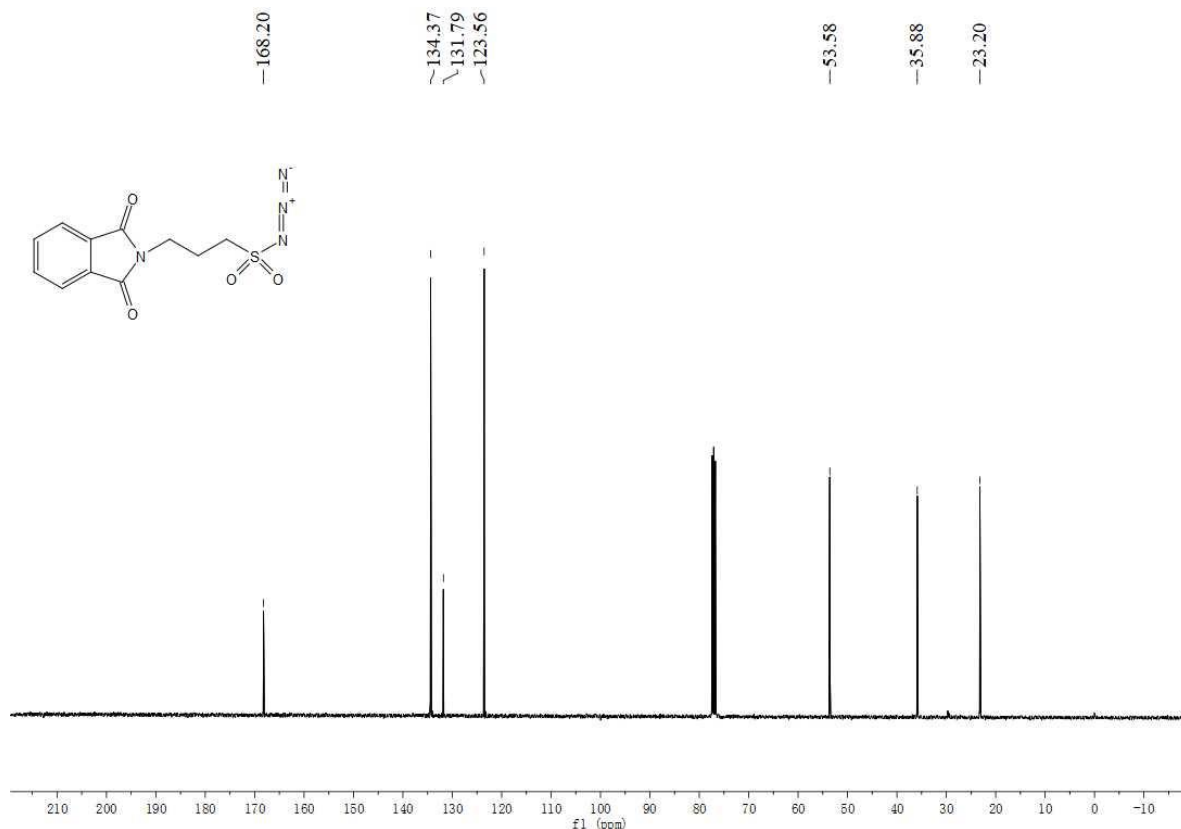

(8*S*,9*R*,13*R*,14*R*)-13-methyl-17-oxo-7,8,9,11,12,13,14,15,16,17-decahydro-6H-cyclopenta[*a*]phenanthren-3-yl 5-((4-(2-(2,6-dioxopiperidin-3-yl)-1,3-dioxisoindolin-5-yl)piperazin-1-yl)sulfonyl)pentanoate (**14**)

# <sup>1</sup>H NMR

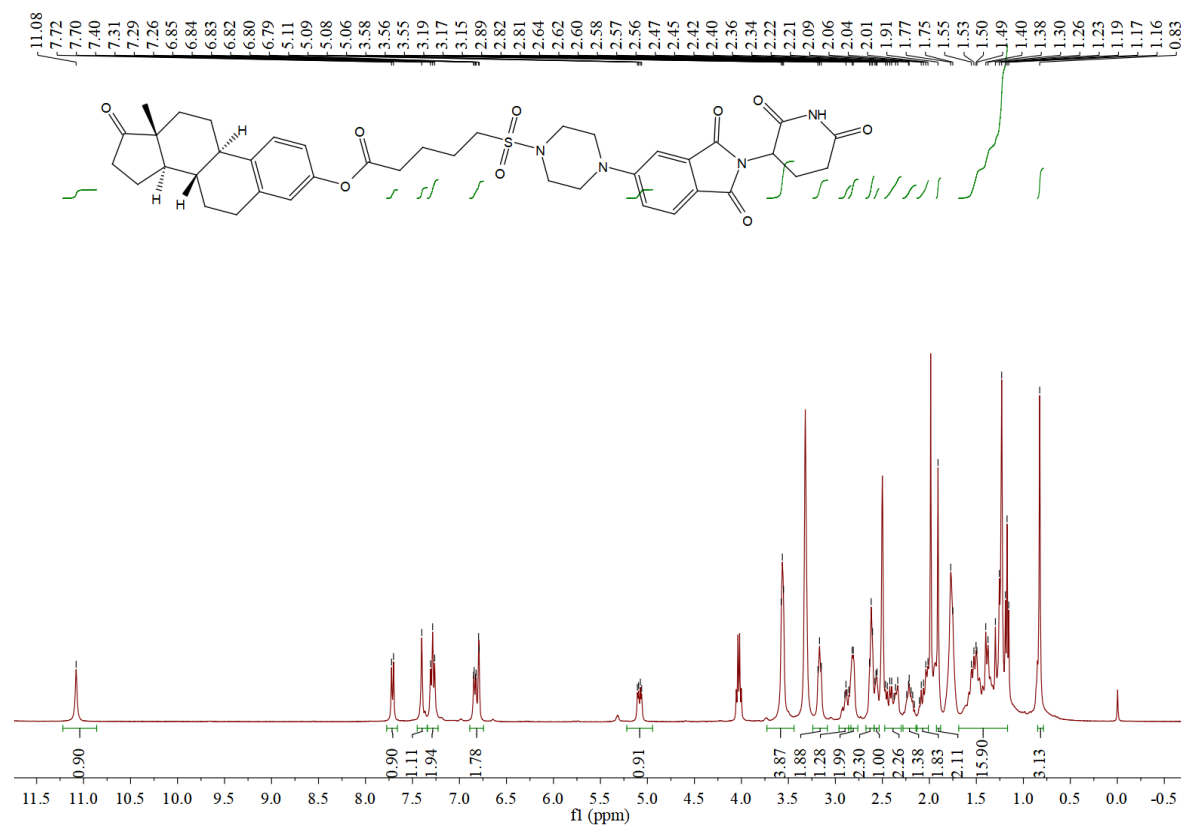

# <sup>13</sup>C NMR

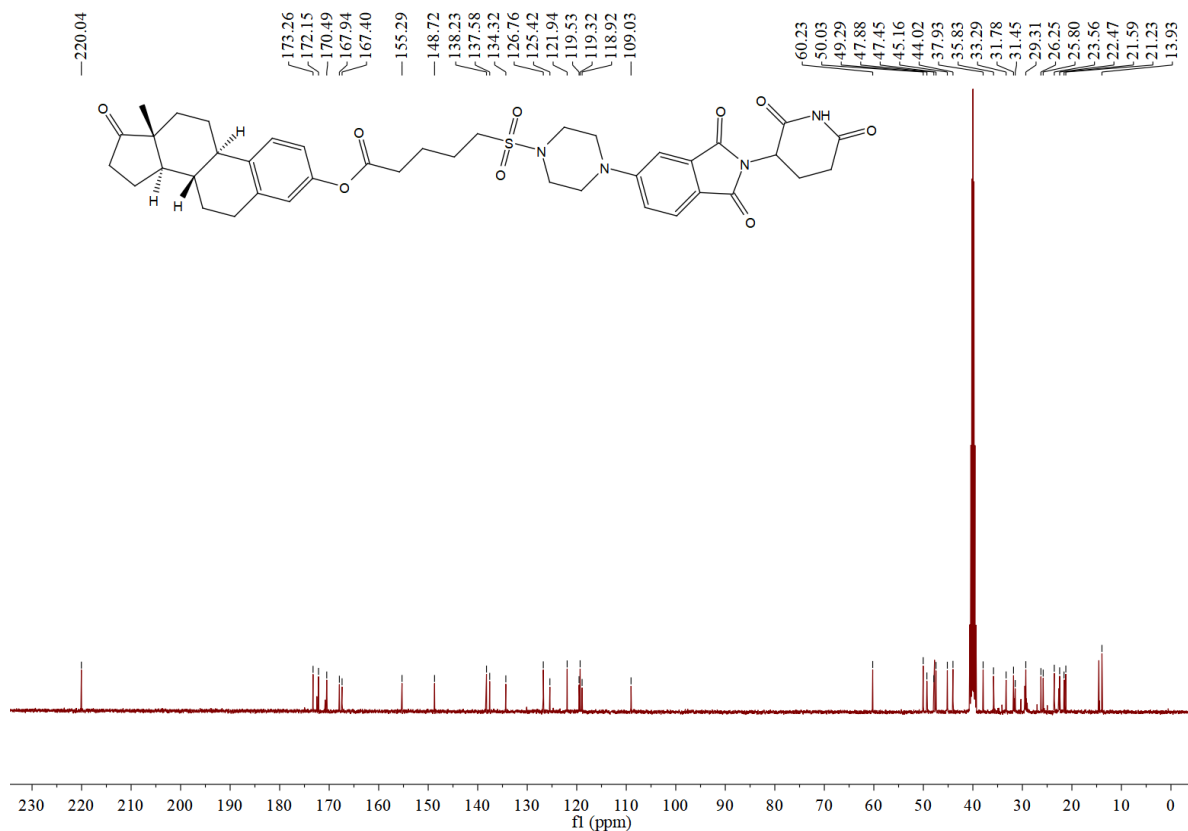

5-(((8*R*,9*S*,13*S*,14*S*)-13-methyl-17-oxo-7,8,9,11,12,13,14,15,16,17-decahydro-6*H*-cyclopenta[*a*]phenanthren-3-yl)oxy)sulfonyl)pentyl 2-(4-isobutylphenyl)propanoate (**16**)

# <sup>1</sup>H NMR

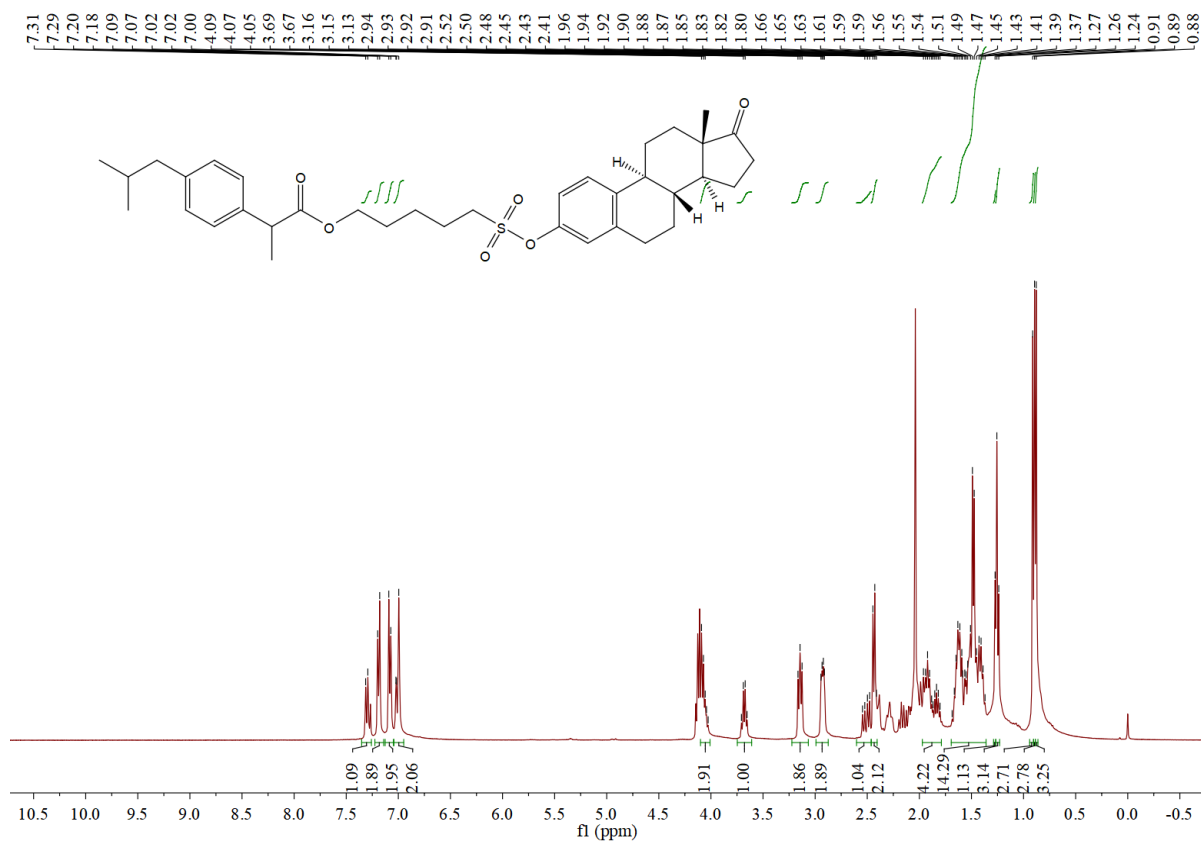

# <sup>13</sup>C NMR

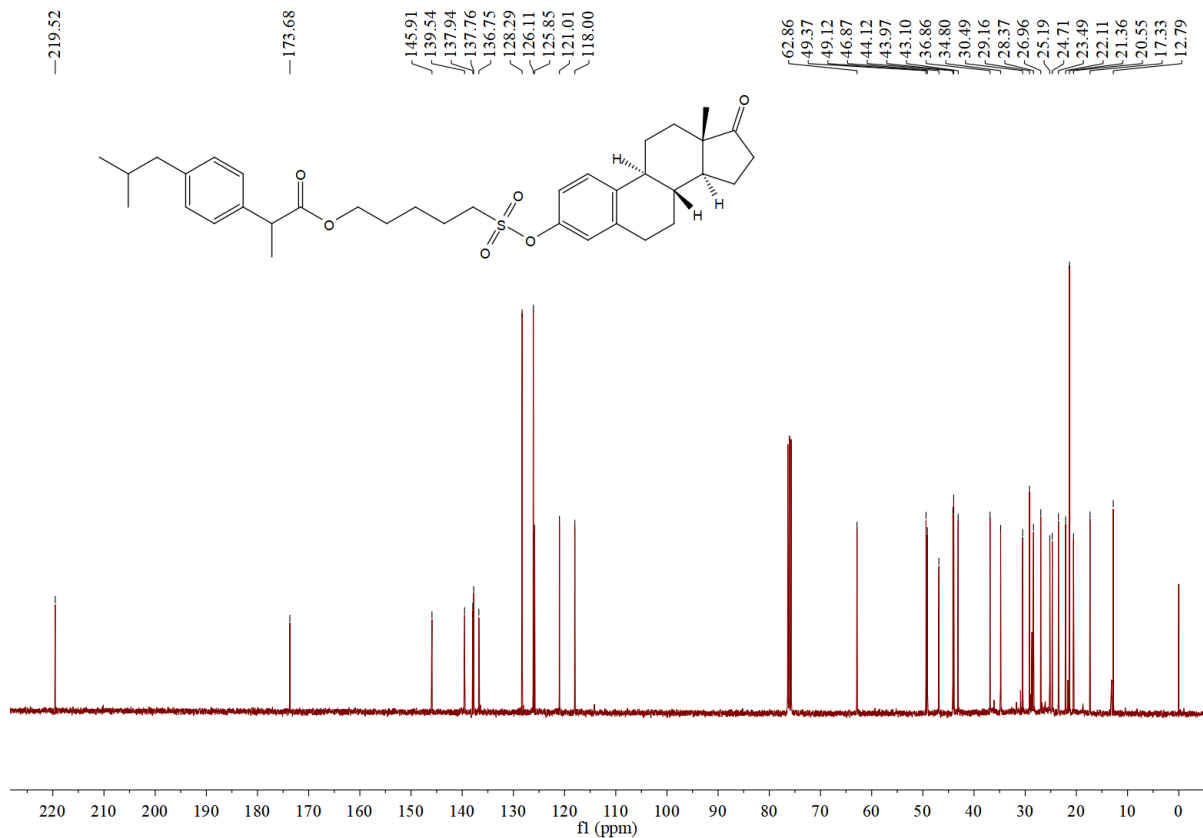

# Phenanthridine (19)

## <sup>1</sup>H NMR

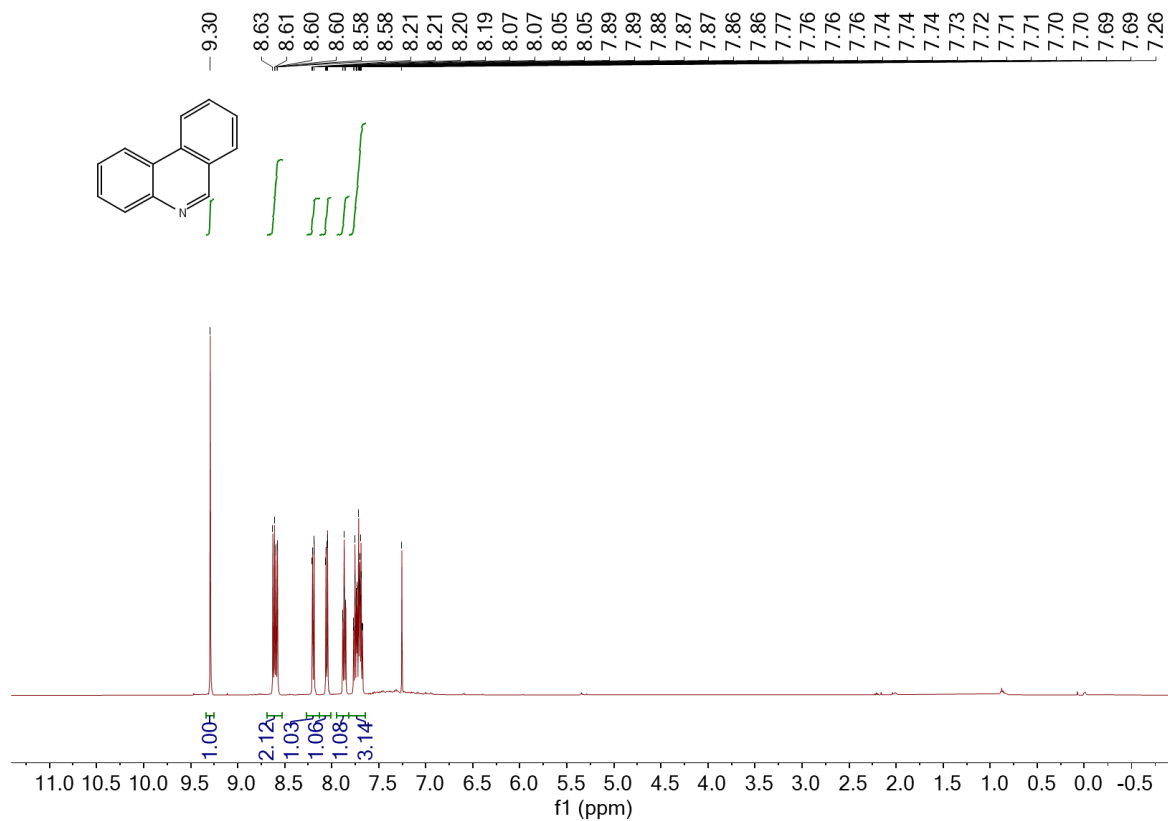

# <sup>13</sup>C NMR

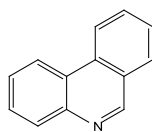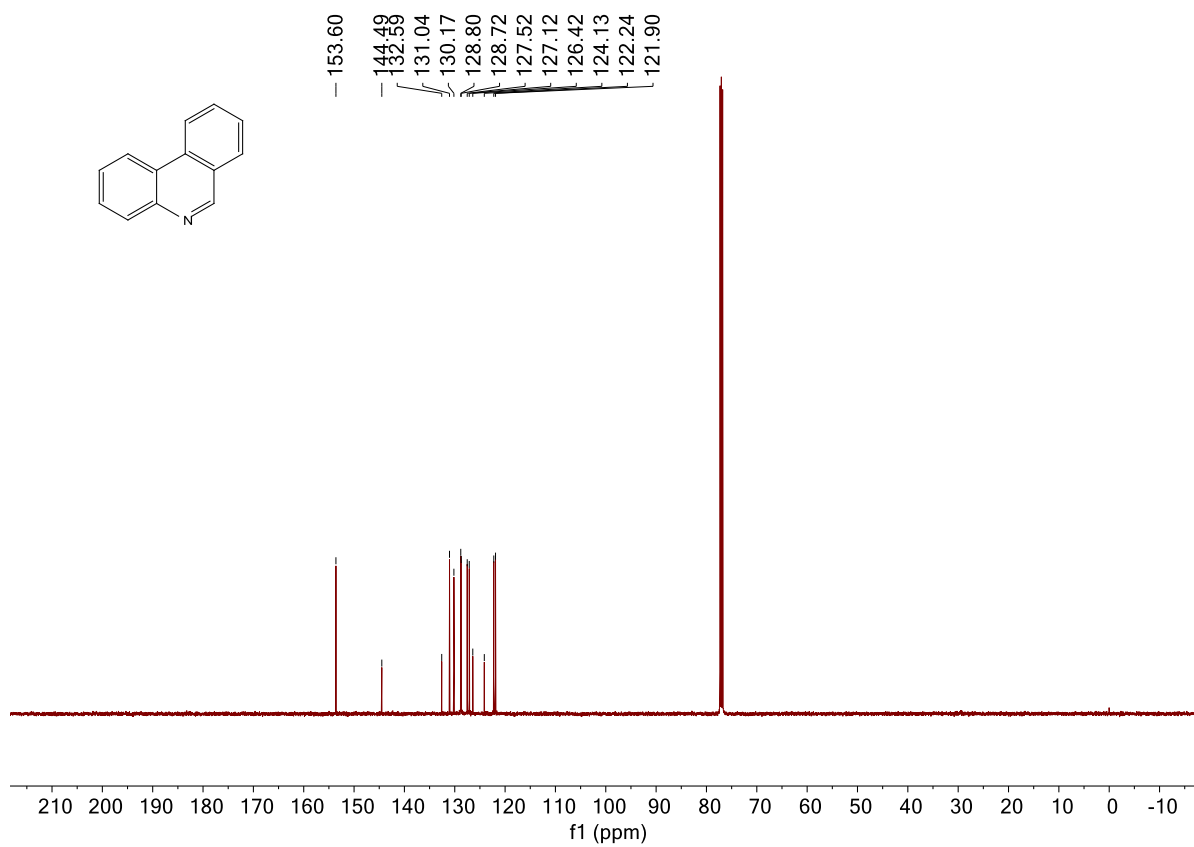

Supplement: d4gc06205a1.pdf [file d4gc06205a1.pdf]
